# Supplementary material for: Return of the Tbx5; lineage-tracing reveals ventricular cardiomyocyte-like precursors in the injured adult mammalian heart
Source: bioRxiv preprint, doi:10.1101/2022.01.28.473428, version 2 (2022-03-01)
Supplement: Supplementary Data 1 [file 473428_file04.xlsx]

## Sheet: DEG (YFP+ vs Pdgfra+)
Probe	Chromosome	Start	End	Probe Strand	Feature	ID	Description	Feature Strand	Type	Feature Orientation	Distance	P-value (EdgeR stats p<0.05 after correction)	FDR (EdgeR stats p<0.05 after correction)	Log2 Fold Change (EdgeR stats p<0.05 after correction)	Galaxy192-[RNA_STAR_on_data_16_and_data_15__mapped.bam].bam	Galaxy1000-[RNA_STAR_on_data_949_and_data_948__mapped.bam].bam	Galaxy1018-[RNA_STAR_on_data_961_and_data_960__mapped.bam].bam	Galaxy189-[RNA_STAR_on_data_14_and_data_13__mapped.bam].bam	Galaxy781-[RNA_STAR_on_data_771_and_data_770__mapped.bam].bam	Galaxy1186-[RNA_STAR_on_data_1115_and_data_1114__mapped.bam].bam	Galaxy1238-[adult_YFP__13-1.bam].bam	Galaxy210-[RNA_STAR_on_data_28_and_data_27__mapped.bam].bam	Galaxy1222-[RNA_STAR_on_data_1139_and_data_1138__mapped.bam].bam	Galaxy1050-[RNA_STAR_on_data_1022_and_data_1021__mapped.bam].bam	Galaxy1210-[RNA_STAR_on_data_1131_and_data_1130__mapped.bam].bam	Galaxy1213-[RNA_STAR_on_data_1133_and_data_1132__mapped.bam].bam	Galaxy1059-[RNA_STAR_on_data_1028_and_data_1027__mapped.bam].bam	Galaxy1086-[RNA_STAR_on_data_1070_and_data_1069__mapped.bam].bam	Galaxy841-[RNA_STAR_on_data_807_and_data_806__mapped.bam].bam	Galaxy991-[RNA_STAR_on_data_943_and_data_942__mapped.bam].bam	Galaxy1006-[RNA_STAR_on_data_953_and_data_952__mapped.bam].bam	Galaxy1207-[RNA_STAR_on_data_1129_and_data_1128__mapped.bam].bam	Galaxy829-[RNA_STAR_on_data_799_and_data_798__mapped.bam].bam	Galaxy967-[RNA_STAR_on_data_926_and_data_925__mapped.bam].bam	Galaxy1171-[RNA_STAR_on_data_1105_and_data_1104__mapped.bam].bam	Galaxy887-[RNA_STAR_on_data_863_and_data_862__mapped.bam].bam	Galaxy186-[RNA_STAR_on_data_12_and_data_11__mapped.bam].bam	Galaxy207-[RNA_STAR_on_data_26_and_data_25__mapped.bam].bam	Galaxy183-[RNA_STAR_on_data_10_and_data_9__mapped.bam].bam	Galaxy817-[RNA_STAR_on_data_791_and_data_790__mapped.bam].bam	Galaxy847-[RNA_STAR_on_data_811_and_data_810__mapped.bam].bam	Galaxy970-[RNA_STAR_on_data_928_and_data_927__mapped.bam].bam	Galaxy869-[RNA_STAR_on_data_851_and_data_850__mapped.bam].bam	Galaxy994-[RNA_STAR_on_data_945_and_data_944__mapped.bam].bam	Galaxy1162-[RNA_STAR_on_data_1099_and_data_1098__mapped.bam].bam	Galaxy875-[RNA_STAR_on_data_855_and_data_854__mapped.bam].bam	Galaxy1234-[RNA_STAR_on_data_1147_and_data_1146__mapped.bam].bam	Galaxy973-[RNA_STAR_on_data_930_and_data_929__mapped.bam].bam	Galaxy1003-[RNA_STAR_on_data_951_and_data_950__mapped.bam].bam
Gm19938	1	3647309	3658904	-	Gm19938	ENSMUSG00000102331	predicted gene, 19938 [Source:MGI Symbol;Acc:MGI:5012123]	-	gene	Name match	0	0.00242082	0.0110249	6.70242	-11.2921	-3.26115	-8.86364	-15.4203	-24.0085	-23.8046	-19.3382	-18.2415	-14.9703	-11.1093	-16.363	-16.7703	-16.0555	-10.8192	-18.9913	-15.6421	-16.7876	-17.5126	-15.6753	-13.3359	-13.3891	-17.6904	-17.4258	-11.0397	-10.5946	-12.043	-14.0162	-12.7428	-13.4926	-16.3965	-15.1514	-14.7555	-15.8569	-13.8934	-17.4417
Mrpl15	1	4773206	4785739	-	Mrpl15	ENSMUSG00000033845	mitochondrial ribosomal protein L15 [Source:MGI Symbol;Acc:MGI:1351639]	-	gene	Name match	0	1.06841e-10	1.38881e-09	-5.06143	-9.27351	-10.8338	-11.505	-5.35395	-17.7399	-16.4887	-9.47346	-12.8441	-6.75059	-11.2752	-8.06115	-8.21875	-13.216	-5.20152	-11.272	-8.38317	-11.5778	-9.79337	-15.7876	-6.02001	-6.52912	-10.2583	-17.538	-11.1519	-10.7068	-12.1552	-6.99909	-7.5737	-6.94505	-11.1473	-8.05629	-6.60721	-7.1306	-8.41789	-9.83965
Gm37144	1	4778063	4779212	-	Gm37144	ENSMUSG00000102275	predicted gene, 37144 [Source:MGI Symbol;Acc:MGI:5610372]	-	gene	Name match	0	9.99843e-11	1.30493e-09	7.98581	-5.82737	-11.3325	-12.3724	-3.09513	-14.2937	-13.0426	-6.02731	-9.39799	-3.30445	-7.82906	-4.71724	-4.95344	-9.76986	-1.79076	-7.82588	-4.93703	-8.1317	-6.34723	-12.3414	-2.57387	-3.08298	-7.01462	-14.0918	-7.70577	-7.2607	-8.70906	-3.55295	-4.12755	-3.49891	-7.70113	-4.85808	-3.16107	-3.68445	-5.02735	-6.39351
Lypla1	1	4807788	4848410	+	Lypla1	ENSMUSG00000025903	lysophospholipase 1 [Source:MGI Symbol;Acc:MGI:1344588]	+	gene	Name match	0	1.18161e-14	2.5319e-13	-4.84243	-11.0782	-7.98502	-19.515	-17.2289	-16.1813	-25.6133	-15.2944	-14.6887	-16.779	-21.3036	-18.1717	-18.579	-22.2641	-16.5872	-20.8	-17.4508	-13.0519	-19.3213	-17.484	-15.1446	-15.1977	-19.499	-19.2344	-12.8484	-12.4033	-13.8517	-15.8248	-14.5514	-15.3013	-18.2052	-16.96	-16.5642	-17.6655	-19.3135	-19.2503
Gm37988	1	4807892	4886770	+	Gm37988	ENSMUSG00000104217	predicted gene, 37988 [Source:MGI Symbol;Acc:MGI:5611216]	+	gene	Name match	0	1.08752e-19	4.24407e-18	-4.59724	-11.399	-8.82276	-17.0042	-18.1863	-17.1387	-26.5706	-16.2518	-15.646	-17.7363	-22.2609	-19.129	-12.2654	-23.2215	-12.1831	-15.5392	-18.4081	-14.0092	-20.2786	-13.0414	-16.1019	-16.1551	-13.7045	-20.1918	-13.8057	-13.3606	-14.809	-16.7822	-15.5088	-16.2586	-19.1625	-17.9174	-17.5215	-18.6229	-13.0854	-13.5011
Tcea1	1	4857814	4897909	+	Tcea1	ENSMUSG00000033813	transcription elongation factor A (SII) 1 [Source:MGI Symbol;Acc:MGI:1196624]	+	gene	Name match	0	2.5042e-32	3.301e-30	-7.13897	-11.3971	-24.0595	-24.555	-17.2101	-25.7983	-25.5944	-21.128	-20.0313	-16.7601	-21.2847	-18.1529	-13.0862	-22.2453	-11.2069	-14.1373	-17.4319	-18.5774	-19.3025	-12.0652	-15.1257	-15.1789	-13.4213	-19.2156	-12.8295	-12.3844	-13.8328	-15.806	-14.5326	-15.2825	-18.1863	-13.2042	-16.5454	-17.6467	-14.2357	-19.2315
Atp6v1h	1	5070018	5162529	+	Atp6v1h	ENSMUSG00000033793	ATPase, H+ transporting, lysosomal V1 subunit H [Source:MGI Symbol;Acc:MGI:1914864]	+	gene	Name match	0	7.08611e-05	0.000412027	-4.96597	-10.7575	-18.1137	-18.3613	-11.2419	-27.0045	-20.766	-14.5169	-21.2375	-10.4924	-22.4909	-19.359	-12.2567	-23.4515	-11.2475	-13.8695	-12.8714	-13.5872	-20.5086	-18.6714	-16.3319	-9.54659	-20.6864	-20.4218	-14.0357	-13.5906	-15.039	-17.0122	-15.7388	-9.70728	-11.7729	-18.1474	-13.2776	-11.7467	-14.159	-14.4277
Rb1cc1	1	6206197	6276648	+	Rb1cc1	ENSMUSG00000025907	RB1-inducible coiled-coil 1 [Source:MGI Symbol;Acc:MGI:1341850]	+	gene	Name match	0	2.39876e-13	4.34917e-12	-7.75199	-11.5336	-15.5608	-10.671	-12.9644	-19.6521	-26.4076	-21.9412	-20.8445	-17.5733	-22.0979	-18.966	-19.3733	-23.0585	-17.3815	-21.5943	-18.2451	-19.3906	-20.1156	-18.2784	-15.9389	-15.9921	-20.2934	-20.0288	-13.6427	-13.1976	-14.646	-16.6192	-15.3458	-16.0956	-18.9995	-17.7544	-17.3585	-18.4599	-15.312	-14.5004
Pcmtd1	1	7088920	7173628	+	Pcmtd1	ENSMUSG00000051285	protein-L-isoaspartate (D-aspartate) O- methyltransferase domain containing 1 [Source:MGI Symbol;Acc:MGI:2441773]	+	gene	Name match	0	9.86674e-23	5.17183e-21	-9.90608	-11.6999	-16.107	-20.0558	-12.6136	-20.1254	-20.1465	-16.9258	-21.1103	-11.2114	-15.3663	-19.2319	-13.6798	-23.3243	-12.286	-14.9268	-14.8996	-12.471	-14.0007	-18.5442	-16.2048	-16.258	-20.5593	-20.2947	-13.9086	-13.4635	-14.9119	-16.885	-15.6117	-16.3615	-19.2654	-12.3447	-14.013	-13.3258	-13.9179	-15.2517
Gm37005	1	8643696	8644859	-	Gm37005	ENSMUSG00000103884	predicted gene, 37005 [Source:MGI Symbol;Acc:MGI:5610233]	-	gene	Name match	0	0.00497606	0.0215769	6.08517	-14.4315	-8.03219	-4.21446	-12.1038	-20.692	-20.4881	-16.0217	-14.925	-11.6538	-16.1784	-13.0466	-13.4538	-17.139	-11.4621	-15.6748	-12.3257	-13.4711	-14.1962	-12.3589	-10.0195	-10.0726	-14.3739	-14.1093	-7.72323	-7.27815	-8.72652	-10.6997	-9.4263	-10.1762	-13.08	-11.8349	-11.4391	-12.5404	-14.1883	-14.1252
Sgk3	1	9798107	9900845	+	Sgk3	ENSMUSG00000025915	serum/glucocorticoid regulated kinase 3 [Source:MGI Symbol;Acc:MGI:2182368]	+	gene	Name match	0	8.48302e-07	6.45264e-06	-4.62858	-9.51258	-15.0385	-15.4229	-7.88709	-18.3599	-16.6175	-13.4236	-12.6707	-8.05567	-12.1054	-9.1307	-9.68608	-13.6958	-7.83422	-12.0902	-9.00622	-10.038	-10.7817	-9.38754	-6.51581	-6.54044	-11.6196	-12.3178	-7.96888	-13.7419	-6.40891	-7.78022	-5.92266	-6.95069	-9.43323	-7.88454	-7.72566	-8.99263	-10.2605	-10.3535
Mcmdc2	1	9908638	9942085	+	Mcmdc2	ENSMUSG00000046101	minichromosome maintenance domain containing 2 [Source:MGI Symbol;Acc:MGI:3045334]	+	gene	Name match	0	9.26031e-05	0.000530474	7.6384	-11.1018	-9.13076	-7.82393	-8.34122	-17.3904	-17.8146	-13.7258	-14.2254	-10.5917	-13.0574	-11.1394	-11.0913	-14.6321	-12.6954	-12.844	-17.1704	-18.3158	-13.2451	-13.7297	-11.1272	-14.9174	-12.3662	-13.7146	-12.568	-12.1229	-13.5713	-9.96618	-7.36416	-9.37706	-12.6435	-8.86231	-9.88388	-11.5052	-12.6332	-12.5326
Snhg6	1	9941959	9944118	-	Snhg6	ENSMUSG00000098234	small nucleolar RNA host gene 6 [Source:MGI Symbol;Acc:MGI:1921074]	-	gene	Name match	0	4.06156e-08	3.74107e-07	-6.56834	-11.712	-15.7863	-20.3407	-8.59581	-21.5839	-21.3801	-16.9137	-15.8169	-12.5458	-17.0704	-13.9385	-14.3458	-14.557	-8.61703	-16.5668	-13.2176	-10.4037	-15.0881	-13.2508	-10.9114	-10.9646	-15.2658	-15.0012	-8.61517	-8.17009	-9.61846	-11.5916	-10.3182	-11.0681	-13.972	-12.7268	-12.331	-13.4324	-11.9283	-15.0171
Cops5	1	10024601	10038168	-	Cops5	ENSMUSG00000025917	COP9 signalosome subunit 5 [Source:MGI Symbol;Acc:MGI:1349415]	-	gene	Name match	0	1.29951e-08	1.27273e-07	-6.3087	-10.4302	-18.6438	-22.9918	-15.6468	-24.235	-20.5573	-19.5648	-18.468	-15.1969	-13.4402	-16.5896	-11.8449	-16.6231	-10.0982	-19.2179	-12.2573	-13.4027	-17.7392	-12.2905	-9.71005	-13.6157	-17.917	-17.6524	-11.2663	-10.8212	-12.2696	-10.2834	-12.9693	-13.7192	-16.6231	-11.4186	-10.2451	-11.4079	-13.6725	-17.6683
Prex2	1	10993465	11303681	+	Prex2	ENSMUSG00000048960	phosphatidylinositol-3,4,5-trisphosphate- dependent Rac exchange factor 2 [Source:MGI Symbol;Acc:MGI:1923385]	+	gene	Name match	0	2.85452e-18	9.63902e-17	-6.54916	-12.4564	-17.1553	-18.5314	-13.0791	-28.75	-23.8706	-17.2839	-18.4387	-15.2379	-24.2365	-21.1046	-17.1899	-20.4601	-14.4612	-17.1546	-20.3837	-21.5291	-22.2542	-20.4169	-18.0775	-18.1307	-17.1507	-22.1674	-15.7813	-15.3362	-16.7846	-18.7577	-13.3323	-18.2342	-21.1381	-19.8929	-19.4971	-20.5985	-22.2464	-22.1833
Sulf1	1	12692277	12861192	+	Sulf1	ENSMUSG00000016918	sulfatase 1 [Source:MGI Symbol;Acc:MGI:2138563]	+	gene	Name match	0	1.80631e-38	4.25751e-36	-10.3278	-12.6276	-14.8224	-16.249	-12.533	-27.8731	-22.1597	-17.8029	-22.1061	-13.513	-18.8152	-12.4246	-13.7824	-24.3201	-18.6431	-15.157	-19.5067	-20.6522	-15.1167	-19.54	-17.2005	-17.2537	-21.555	-21.2904	-14.9043	-14.4592	-15.9076	-17.8808	-16.6074	-17.3572	-20.2611	-14.694	-12.4681	-19.7215	-14.0276	-16.8323
Ncoa2	1	13139105	13374083	-	Ncoa2	ENSMUSG00000005886	nuclear receptor coactivator 2 [Source:MGI Symbol;Acc:MGI:1276533]	-	gene	Name match	0	2.44226e-05	0.000151776	-4.36187	-12.8335	-15.6367	-16.7324	-13.4798	-17.1012	-20.949	-17.3977	-22.5823	-19.3111	-17.1139	-20.7039	-14.7112	-24.7963	-19.1194	-23.3321	-15.9241	-14.7096	-21.8535	-20.0162	-17.6767	-11.6006	-22.0312	-17.3667	-15.3805	-14.9354	-11.6469	-18.357	-17.0836	-12.981	-20.7373	-14.386	-19.0964	-20.1977	-17.5237	-17.4606
Tram1	1	13564698	13589910	-	Tram1	ENSMUSG00000025935	translocating chain-associating membrane protein 1 [Source:MGI Symbol;Acc:MGI:1919515]	-	gene	Name match	0	7.57519e-24	4.5774e-22	-6.17421	-13.8096	-14.6383	-14.453	-10.8652	-25.129	-24.9251	-14.8149	-19.362	-16.0908	-16.5565	-12.6311	-17.8908	-21.576	-12.2876	-20.1118	-16.7627	-17.9081	-14.6738	-16.7959	-14.4565	-14.5096	-18.8109	-18.5463	-12.1602	-11.7152	-13.1635	-15.1367	-13.8633	-14.6132	-17.517	-12.6605	-15.8761	-16.9774	-18.6253	-14.4102
Lactb2	1	13623330	13660546	-	Lactb2	ENSMUSG00000025937	lactamase, beta 2 [Source:MGI Symbol;Acc:MGI:2442551]	-	gene	Name match	0	5.90062e-05	0.000348216	-6.06225	-11.7008	-15.5616	-19.1662	-13.7807	-25.6908	-25.4869	-21.0205	-19.9238	-11.9157	-17.1183	-13.2495	-14.0527	-18.5264	-16.4609	-20.6736	-17.3245	-18.4699	-19.195	-17.3577	-15.0183	-10.6715	-19.3727	-19.1081	-12.722	-12.277	-13.7253	-15.6985	-14.4251	-15.175	-18.0788	-16.8337	-16.4379	-17.5392	-19.1871	-19.124
Msc	1	14753346	14755992	-	Msc	ENSMUSG00000025930	musculin [Source:MGI Symbol;Acc:MGI:1333884]	-	gene	Name match	0	4.41221e-07	3.50368e-06	-8.07873	-15.6167	-14.4946	-20.634	-13.2891	-21.8773	-21.6734	-17.207	-16.1103	-12.8391	-17.3637	-14.2318	-14.6391	-18.3243	-12.6473	-16.8601	-13.5109	-14.6564	-15.3814	-13.5441	-11.2047	-11.2579	-15.5592	-15.2946	-8.90849	-8.46342	-9.91179	-11.885	-10.6116	-11.3614	-14.2653	-13.0202	-12.6243	-13.7257	-15.3736	-15.3105
Terf1	1	15805646	15844052	+	Terf1	ENSMUSG00000025925	telomeric repeat binding factor 1 [Source:MGI Symbol;Acc:MGI:109634]	+	gene	Name match	0	0.00281932	0.0127112	-4.07553	-12.0569	-16.0062	-18.2748	-17.148	-22.4143	-22.2104	-21.0659	-19.9692	-16.698	-21.2226	-18.0908	-18.498	-22.1832	-16.5063	-20.719	-11.6633	-18.5153	-19.2404	-17.4031	-15.0637	-15.1168	-19.4181	-19.1535	-12.7674	-12.3224	-13.7707	-15.7439	-14.4705	-15.2204	-18.1242	-16.8791	-16.4833	-17.5846	-19.2325	-19.1694
Rpl7	1	16101295	16104662	-	Rpl7	ENSMUSG00000043716	ribosomal protein L7 [Source:MGI Symbol;Acc:MGI:98073]	-	gene	Name match	0	1.14255e-17	3.56081e-16	-4.696	-6.7301	-20.486	-12.5911	-13.6366	-4.94852	-4.82707	-17.5545	-16.4578	-13.1866	-17.7112	-14.5794	-14.9866	-18.6718	-12.9949	-17.2076	-13.8585	-15.0039	-15.729	-13.8917	-11.5523	-11.6054	-15.9067	-15.6421	-9.25603	-8.81095	-10.2593	-12.2325	-3.79587	-11.709	-14.6128	-13.3677	-12.9719	-14.0732	-15.7211	-15.658
Rdh10	1	16105774	16133734	+	Rdh10	ENSMUSG00000025921	retinol dehydrogenase 10 (all-trans) [Source:MGI Symbol;Acc:MGI:1924238]	+	gene	Name match	0	0.00811385	0.0340502	-5.41444	-11.877	-23.5395	-24.035	-16.6901	-25.2783	-25.0744	-20.608	-19.5113	-16.2401	-20.7647	-17.6328	-14.7181	-21.7252	-16.0483	-20.2611	-16.9119	-18.0573	-18.7824	-16.9451	-14.6057	-14.6589	-18.9602	-18.6956	-12.3095	-11.8644	-13.3128	-15.2859	-14.0126	-14.7624	-13.1924	-11.8097	-16.0253	-17.1267	-18.7746	-18.7115
Ube2w	1	16540790	16619489	-	Ube2w	ENSMUSG00000025939	ubiquitin-conjugating enzyme E2W (putative) [Source:MGI Symbol;Acc:MGI:1914049]	-	gene	Name match	0	6.43467e-14	1.26041e-12	-6.10009	-12.1688	-15.0844	-18.543	-13.6387	-26.7712	-26.5673	-17.8615	-16.4599	-17.733	-22.2576	-19.1258	-19.533	-23.2182	-17.5413	-21.754	-18.4049	-19.5503	-20.2754	-18.4381	-16.0987	-16.1518	-20.4531	-20.1885	-13.8024	-13.3574	-14.8057	-16.7789	-15.5055	-16.2554	-19.1592	-17.9141	-17.5183	-18.6196	-20.2675	-20.2044
Eloc	1	16641725	16657042	-	Eloc	ENSMUSG00000079658	elongin C [Source:MGI Symbol;Acc:MGI:1915173]	-	gene	Name match	0	1.00447e-17	3.16093e-16	-6.29905	-18.1495	-22.6713	-16.6054	-15.8219	-10.1006	-24.2062	-19.7398	-18.6431	-15.3719	-19.8965	-16.7646	-17.1719	-20.8571	-15.1801	-19.3929	-16.0437	-17.1892	-17.9142	-16.0769	-13.7375	-13.7907	-18.092	-17.8274	-11.4413	-10.9962	-12.4446	-14.4178	-13.1444	-13.8942	-16.7981	-15.553	-15.1571	-16.2585	-17.9064	-17.8433
Tmem70	1	16665207	16678275	+	Tmem70	ENSMUSG00000025940	transmembrane protein 70 [Source:MGI Symbol;Acc:MGI:1915068]	+	gene	Name match	0	0.00589417	0.025299	-4.68058	-13.8615	-9.2706	-10.9548	-15.5928	-24.181	-23.9771	-12.209	-18.414	-15.1428	-19.6674	-16.5356	-16.9428	-20.628	-14.951	-19.1638	-15.8146	-16.9601	-17.6852	-15.8479	-13.5084	-13.5616	-17.8629	-17.5983	-11.2122	-10.7671	-12.2155	-14.1887	-12.9153	-13.6651	-16.569	-15.3239	-14.928	-16.0294	-17.6773	-13.3747
Ly96	1	16688051	16709611	+	Ly96	ENSMUSG00000025779	lymphocyte antigen 96 [Source:MGI Symbol;Acc:MGI:1341909]	+	gene	Name match	0	4.27115e-05	0.000256565	-2.63087	-11.6578	-23.1645	-15.2744	-16.3151	-24.9033	-24.6994	-20.233	-19.1363	-15.8651	-20.3897	-17.2578	-17.6651	-21.3503	-15.6733	-19.8861	-16.5369	-17.6824	-18.4074	-16.5701	-14.2307	-14.2839	-18.5852	-18.3206	-11.9345	-11.4894	-12.9378	-14.911	-13.6376	-14.3874	-17.2913	-16.0462	-15.6503	-16.7517	-18.3996	-18.3365
Jph1	1	16964560	17097889	-	Jph1	ENSMUSG00000042686	junctophilin 1 [Source:MGI Symbol;Acc:MGI:1891495]	-	gene	Name match	0	0.00124996	0.0059816	5.53688	-8.86803	-9.13428	-7.14635	-12.5248	-27.5318	-27.3279	-17.4616	-15.105	-18.4936	-23.0182	-15.5644	-20.2936	-23.9788	-13.9019	-22.5146	-14.0592	-20.3109	-14.6551	-12.6716	-16.8592	-16.9124	-21.2137	-20.9491	-14.563	-14.1179	-11.4143	-17.5395	-16.2661	-17.0159	-19.9198	-14.6158	-14.0394	-19.3802	-21.0281	-20.965
Pi15	1	17601901	17630939	+	Pi15	ENSMUSG00000067780	peptidase inhibitor 15 [Source:MGI Symbol;Acc:MGI:1934659]	+	gene	Name match	0	3.83608e-13	6.78915e-12	-5.54739	-11.7604	-15.2375	-17.7087	-11.7853	-25.3328	-21.2765	-20.6626	-19.5658	-16.2946	-20.8193	-17.6874	-18.0946	-17.2355	-11.4915	-15.7713	-16.9665	-18.1119	-18.837	-12.5258	-14.6603	-14.7134	-13.8627	-18.7501	-12.3641	-11.919	-9.21535	-15.3405	-14.0671	-14.817	-13.8684	-12.1538	-16.0799	-17.1812	-18.8292	-18.766
Gm28653	1	20669882	20684298	+	Gm28653	ENSMUSG00000099906	predicted gene 28653 [Source:MGI Symbol;Acc:MGI:5579359]	+	gene	Name match	0	7.07099e-09	7.19862e-08	-4.01032	-11.2662	-22.5838	-15.7574	-15.7344	-24.3226	-24.1187	-19.6523	-18.5556	-15.2844	-10.9531	-16.6772	-17.0844	-20.7696	-15.0927	-19.3054	-15.9563	-17.1017	-17.8268	-15.9895	-13.6501	-13.7032	-18.0045	-17.7399	-11.3538	-10.9088	-12.3571	-14.3303	-13.0569	-13.8068	-16.7106	-15.4655	-15.0697	-16.171	-17.8189	-17.7558
Mcm3	1	20802968	20820312	-	Mcm3	ENSMUSG00000041859	minichromosome maintenance complex component 3 [Source:MGI Symbol;Acc:MGI:101845]	-	gene	Name match	0	0.00139579	0.0066219	-3.10904	-11.2699	-22.8506	-23.3461	-16.0012	-24.5894	-24.3855	-19.9191	-18.8224	-15.5512	-20.0758	-16.9439	-17.3512	-21.0363	-15.3594	-19.5722	-16.223	-9.54402	-18.0935	-16.2562	-13.9168	-13.97	-18.2713	-18.0067	-11.6206	-11.1755	-12.6239	-14.597	-13.3237	-14.0735	-16.9774	-15.7323	-15.3364	-16.4378	-13.4743	-18.0226
Paqr8	1	20890606	20939650	+	Paqr8	ENSMUSG00000025931	progestin and adipoQ receptor family member VIII [Source:MGI Symbol;Acc:MGI:1921479]	+	gene	Name match	0	0.00023326	0.00126381	-3.20885	-12.7339	-14.8898	-24.8457	-11.6763	-26.0889	-25.8851	-21.4187	-20.3219	-17.0508	-21.5754	-18.4435	-14.5288	-22.5359	-16.859	-21.0718	-17.7226	-18.868	-19.5931	-17.7558	-15.4164	-15.4696	-19.7708	-19.5063	-13.1202	-12.6751	-14.1235	-10.9446	-14.8232	-15.5731	-14.74	-17.2318	-16.836	-17.9374	-19.5853	-19.5222
Tram2	1	20996299	21079229	-	Tram2	ENSMUSG00000041779	translocating chain-associating membrane protein 2 [Source:MGI Symbol;Acc:MGI:1924817]	-	gene	Name match	0	2.20932e-30	2.39003e-28	-6.97171	-11.0462	-16.2111	-16.2131	-12.749	-26.8467	-26.6429	-22.1765	-21.0797	-17.8086	-22.3332	-13.5575	-13.9647	-23.2937	-17.6168	-21.8296	-18.4804	-19.6258	-20.3509	-18.5136	-16.1742	-16.2274	-20.5287	-20.2641	-13.878	-13.4329	-14.8813	-16.8544	-15.581	-16.3309	-19.2348	-12.0047	-17.5938	-18.6952	-20.3431	-14.8426
Tmem14a	1	21218575	21230167	+	Tmem14a	ENSMUSG00000025933	transmembrane protein 14A [Source:MGI Symbol;Acc:MGI:1922962]	+	gene	Name match	0	0.00030814	0.00163662	-2.57936	-17.7475	-22.2693	-6.41342	-15.4199	-24.0081	-23.8042	-19.3378	-18.2411	-14.9699	-19.4945	-16.3627	-16.7699	-16.2156	-9.53868	-18.9909	-15.6417	-16.7872	-17.5123	-15.675	-13.3355	-13.3887	-17.69	-17.4254	-11.0393	-10.5942	-12.0426	-14.0158	-12.7424	-13.4923	-16.3961	-15.151	-14.7551	-15.8565	-17.5044	-17.4413
Gsta3	1	21240589	21265661	+	Gsta3	ENSMUSG00000025934	glutathione S-transferase, alpha 3 [Source:MGI Symbol;Acc:MGI:95856]	+	gene	Name match	0	5.63857e-24	3.47803e-22	-9.75316	-13.0646	-23.3822	-23.8777	-16.5328	-25.121	-24.9171	-20.4507	-19.354	-16.0828	-15.0978	-17.4755	-17.8828	-16.168	-15.891	-20.1038	-16.7546	-17.9001	-14.2252	-16.7879	-14.4484	-14.5016	-18.8029	-18.5383	-12.1522	-11.7071	-13.1555	-15.1287	-9.1183	-14.6051	-17.509	-16.2639	-15.868	-16.9694	-18.6173	-18.5542
Ogfrl1	1	23366424	23397772	-	Ogfrl1	ENSMUSG00000026158	opioid growth factor receptor-like 1 [Source:MGI Symbol;Acc:MGI:1917405]	-	gene	Name match	0	0.00176261	0.00820791	6.1055	-12.1481	-15.3188	-7.69415	-16.8551	-25.4433	-7.93021	-16.0974	-19.6763	-10.6384	-20.9297	-17.7978	-18.2051	-16.0103	-16.2133	-20.4261	-17.0769	-9.65671	-18.9474	-17.1101	-8.78582	-14.8239	-19.1252	-14.5386	-12.4745	-12.0294	-13.4778	-15.4509	-7.42564	-14.9274	-17.8313	-16.5861	-16.1903	-17.2917	-13.1729	-18.8765
B3gat2	1	23761753	23849158	+	B3gat2	ENSMUSG00000026156	beta-1,3-glucuronyltransferase 2 (glucuronosyltransferase S) [Source:MGI Symbol;Acc:MGI:2389490]	+	gene	Name match	0	2.2128e-12	3.59616e-11	-8.87663	-12.6335	-19.5082	-15.8425	-18.3344	-26.9226	-26.7187	-16.674	-21.1556	-17.8844	-22.409	-13.9959	-14.247	-17.7257	-17.6926	-18.294	-18.5562	-19.7017	-20.4267	-18.5894	-16.25	-16.3032	-15.993	-20.3399	-13.9538	-13.5087	-14.9571	-16.9303	-15.6569	-16.4067	-19.3106	-18.0655	-12.6107	-18.771	-16.2669	-20.3558
Smap1	1	23844846	23922317	-	Smap1	ENSMUSG00000026155	small ArfGAP 1 [Source:MGI Symbol;Acc:MGI:2138261]	-	gene	Name match	0	5.13621e-16	1.33044e-14	-6.31866	-12.0552	-17.6778	-7.9856	-13.8384	-18.9745	-26.5447	-18.9262	-17.2445	-12.0989	-22.2349	-19.1031	-19.5103	-23.1955	-17.5186	-21.7313	-12.5863	-15.2057	-20.2527	-18.4154	-16.076	-16.1291	-20.4304	-20.1658	-13.7797	-13.3347	-14.783	-16.7562	-15.4828	-16.2327	-19.1366	-17.8914	-17.4956	-18.5969	-20.2448	-20.1817
Sdhaf4	1	23995939	24005656	-	Sdhaf4	ENSMUSG00000026154	succinate dehydrogenase complex assembly factor 4 [Source:MGI Symbol;Acc:MGI:1915252]	-	gene	Name match	0	1.97511e-07	1.65598e-06	-3.26097	-10.2749	-18.0554	-22.5103	-11.3129	-13.8805	-19.4908	-17.3463	-11.6848	-14.7154	-19.24	-16.1081	-11.6629	-16.3481	-10.4647	-14.6775	-15.3872	-16.5327	-17.2577	-15.4204	-13.081	-13.1342	-17.4355	-17.1709	-10.7848	-10.3397	-11.7881	-13.7613	-12.4879	-13.2377	-16.1416	-14.8965	-14.5006	-11.865	-12.191	-17.1868
Fam135a	1	24011093	24100341	-	Fam135a	ENSMUSG00000026153	family with sequence similarity 135, member A [Source:MGI Symbol;Acc:MGI:1915437]	-	gene	Name match	0	1.11372e-07	9.69151e-07	-3.70348	-11.458	-15.8235	-20.0028	-9.70467	-26.9527	-19.7639	-11.8849	-13.0795	-10.8436	-14.6218	-11.1837	-10.9663	-15.1444	-8.65784	-14.2366	-10.805	-19.7318	-14.2825	-11.4903	-8.71027	-16.3333	-13.1606	-13.633	-13.9839	-13.5388	-9.74773	-11.416	-8.76678	-16.4368	-13.1663	-10.2156	-8.40818	-10.6212	-11.5255	-10.8807
Lmbrd1	1	24678630	24766301	+	Lmbrd1	ENSMUSG00000073725	LMBR1 domain containing 1 [Source:MGI Symbol;Acc:MGI:1915671]	+	gene	Name match	0	1.33715e-15	3.27757e-14	-6.452	-13.3955	-14.9342	-19.8593	-10.1315	-26.927	-21.6169	-12.0494	-9.54391	-11.3792	-14.5471	-10.9397	-12.6788	-16.4406	-7.86729	-15.9764	-13.3642	-19.706	-15.3249	-12.4195	-8.94253	-16.3076	-14.5261	-9.19296	-10.6363	-13.5131	-14.9615	-16.9346	-11.9243	-16.4111	-19.315	-12.2454	-8.42134	-11.1395	-12.1998	-10.8705
Gm5524	1	27884046	27902396	+	Gm5524	ENSMUSG00000101514	predicted gene 5524 [Source:MGI Symbol;Acc:MGI:3646041]	+	gene	Name match	0	0.0031544	0.0141058	-1.85313	-18.4102	-8.44528	-23.4274	-11.4711	-24.6707	-24.4668	-20.0004	-18.9037	-15.6325	-16.4202	-17.0253	-17.4325	-21.1177	-15.4408	-19.6535	-16.3043	-17.4498	-18.1749	-16.3376	-13.9981	-14.0513	-13.6156	-13.0291	-11.7019	-11.2568	-12.7052	-14.6784	-13.405	-14.1549	-17.0587	-9.5955	-10.7422	-16.5191	-18.167	-18.1039
Phf3	1	30802339	30873921	-	Phf3	ENSMUSG00000048874	PHD finger protein 3 [Source:MGI Symbol;Acc:MGI:2446126]	-	gene	Name match	0	4.03256e-13	7.11214e-12	-8.46144	-12.321	-24.8957	-18.8298	-18.0463	-26.6345	-26.4306	-21.9642	-20.8675	-13.1963	-22.1209	-14.5891	-19.3963	-23.0814	-11.3456	-21.6173	-18.2681	-19.4135	-20.1386	-18.3013	-15.9619	-11.6151	-20.3164	-20.0518	-13.6657	-13.2206	-14.669	-16.6421	-15.3688	-16.1186	-19.0225	-17.7773	-17.3815	-18.4829	-20.1308	-20.0677
Gm37906	1	30865504	30868538	-	Gm37906	ENSMUSG00000104315	predicted gene, 37906 [Source:MGI Symbol;Acc:MGI:5611134]	-	gene	Name match	0	4.62671e-06	3.21118e-05	-8.92452	-15.8141	-20.3358	-20.8313	-13.4864	-22.0746	-21.8707	-17.4043	-16.3076	-13.0364	-17.561	-10.0292	-14.8364	-18.5216	-12.8447	-17.0574	-13.7083	-14.8537	-15.5788	-13.7415	-11.4021	-7.05529	-15.7565	-15.4919	-9.10583	-8.66076	-10.1091	-12.0823	-10.8089	-11.5588	-14.4626	-13.2175	-12.8217	-13.923	-15.5709	-15.5078
Ptp4a1	1	30940302	30949309	-	Ptp4a1	ENSMUSG00000117310	protein tyrosine phosphatase 4a1 [Source:NCBI gene;Acc:19243]	-	gene	Name match	0	1.90524e-37	3.98878e-35	-7.42893	-12.5877	-21.9053	-22.4008	-15.0559	-23.6441	-23.4403	-18.9738	-17.8771	-14.6059	-19.1305	-15.9987	-16.4059	-20.0911	-14.4142	-18.6269	-15.2778	-16.4232	-17.1483	-15.311	-12.9716	-13.0247	-17.326	-17.0614	-10.6753	-10.2303	-11.6786	-13.6518	-12.3784	-13.1283	-16.0322	-14.787	-14.3912	-15.4925	-17.1405	-17.0773
Ptp4a1	1	30940302	30949770	-	Ptp4a1	ENSMUSG00000117310	protein tyrosine phosphatase 4a1 [Source:NCBI gene;Acc:19243]	-	gene	Name match	0	7.08932e-36	1.24909e-33	-7.3153	-12.6597	-21.9773	-22.4729	-15.1279	-23.7161	-23.5123	-19.0459	-17.9491	-14.6779	-19.2026	-16.0707	-16.4779	-20.1631	-14.4862	-18.6989	-15.3498	-16.4952	-17.2203	-15.383	-13.0436	-13.0967	-17.398	-17.1334	-10.7473	-10.3023	-11.7506	-13.7238	-12.4504	-13.2003	-16.1042	-14.859	-14.4632	-15.5645	-17.2125	-17.1493
Prim2	1	33453810	33669795	-	Prim2	ENSMUSG00000026134	DNA primase, p58 subunit [Source:MGI Symbol;Acc:MGI:97758]	-	gene	Name match	0	0.00309133	0.0138394	-1.71422	-12.3701	-16.5425	-18.0413	-15.0281	-28.2277	-28.0238	-16.8055	-22.4607	-10.9342	-16.496	-20.5823	-20.9895	-24.6747	-12.696	-23.2105	-19.8614	-21.0068	-21.7319	-19.8946	-17.5552	-17.6083	-21.9096	-17.493	-15.2589	-14.8139	-16.2622	-18.2354	-11.2864	-17.7119	-20.6157	-12.8967	-18.9748	-14.2803	-21.724	-21.6609
Rab23	1	33719887	33742564	+	Rab23	ENSMUSG00000004768	RAB23, member RAS oncogene family [Source:MGI Symbol;Acc:MGI:99833]	+	gene	Name match	0	8.33209e-14	1.60817e-12	-9.72517	-11.2875	-23.2373	-17.2589	-10.914	-24.9761	-24.7723	-20.3059	-14.7352	-15.9379	-20.4626	-17.3307	-17.7379	-21.4231	-15.7462	-19.959	-12.3703	-17.7552	-13.8047	-16.643	-14.3036	-14.3567	-18.658	-18.3934	-12.0074	-11.5623	-13.0107	-14.9838	-13.7104	-14.4603	-17.3642	-11.2666	-15.7232	-16.8245	-18.4725	-18.4093
Zfp451	1	33761545	33814595	-	Zfp451	ENSMUSG00000042197	zinc finger protein 451 [Source:MGI Symbol;Acc:MGI:2137896]	-	gene	Name match	0	9.27059e-15	2.01558e-13	-8.68552	-12.2428	-16.9895	-15.4538	-17.614	-26.2022	-25.9984	-21.5319	-20.4352	-17.164	-21.6887	-18.5568	-18.964	-18.2493	-16.9723	-21.185	-17.8359	-18.9813	-16.2325	-17.8691	-15.5297	-15.5828	-19.8841	-19.6195	-13.2334	-12.7884	-14.2367	-16.2099	-14.9365	-15.6864	-18.5903	-17.3451	-16.9493	-12.5411	-19.6986	-19.6354
Dst	1	33908225	34308661	+	Dst	ENSMUSG00000026131	dystonin [Source:MGI Symbol;Acc:MGI:104627]	+	gene	Name match	0	1.35469e-07	1.16068e-06	-3.32839	-11.7706	-16.8118	-15.658	-11.3838	-24.7964	-23.0076	-16.3832	-14.7689	-12.5883	-13.6763	-13.5007	-16.0557	-18.9871	-12.8057	-17.2627	-16.4301	-15.8385	-13.3106	-15.9894	-18.4458	-18.499	-18.4783	-18.2137	-16.1496	-15.7045	-11.246	-19.126	-10.9727	-18.6025	-16.9621	-20.2612	-13.0695	-14.4054	-17.8188	-16.7557
Gm37354	1	33922455	33924838	+	Gm37354	ENSMUSG00000103596	predicted gene, 37354 [Source:MGI Symbol;Acc:MGI:5610582]	+	gene	Name match	0	1.50507e-05	9.70629e-05	-7.79504	-10.7288	-19.9875	-20.483	-13.1381	-21.7263	-21.5224	-17.056	-15.9593	-12.6881	-17.2127	-14.0809	-14.4881	-18.1733	-12.4963	-16.7091	-13.3599	-14.5054	-15.2305	-13.3932	-11.0537	-11.1069	-15.4082	-15.1436	-8.75752	-8.31245	-9.76081	-11.734	-10.4606	-11.2105	-14.1143	-12.8692	-12.4733	-13.5747	-15.2226	-15.1595
Gm38157	1	34032100	34033797	+	Gm38157	ENSMUSG00000103364	predicted gene, 38157 [Source:MGI Symbol;Acc:MGI:5611385]	+	gene	Name match	0	0.00363324	0.0161014	5.87242	-14.9762	-19.498	-19.9935	-12.6485	-21.2367	-21.0329	-16.5665	-15.4697	-12.1986	-16.7232	-6.71139	-13.9986	-17.6837	-12.0068	-16.2196	-12.8704	-14.0158	-14.7409	-12.9036	-10.5642	-10.6174	-14.9187	-14.6541	-8.26797	-7.8229	-9.27127	-11.2444	-9.97104	-10.7209	-13.6248	-12.3796	-5.47425	-6.70434	-14.7331	-14.67
Ccdc115	1	34436670	34439672	-	Ccdc115	ENSMUSG00000042111	coiled-coil domain containing 115 [Source:MGI Symbol;Acc:MGI:1916918]	-	gene	Name match	0	1.01671e-05	6.73349e-05	-6.4732	-15.7988	-20.3205	-12.4256	-13.4711	-22.0593	-21.8555	-17.389	-16.2923	-13.0211	-17.5457	-14.4139	-14.8211	-18.5063	-12.8294	-17.0421	-13.693	-14.8384	-15.5635	-13.7262	-11.3868	-11.4399	-15.7412	-15.4766	-9.09054	-8.64547	-10.0938	-12.067	-10.7936	-11.5435	-14.4474	-13.2022	-12.8064	-9.36341	-15.5557	-15.4925
Imp4	1	34439851	34449356	+	Imp4	ENSMUSG00000026127	IMP4, U3 small nucleolar ribonucleoprotein [Source:MGI Symbol;Acc:MGI:106572]	+	gene	Name match	0	0.0017297	0.00808004	-5.07972	-9.95165	-21.983	-13.8346	-7.90473	-23.7217	-23.5179	-19.0515	-17.9547	-10.8311	-19.2082	-10.6024	-16.4836	-20.1687	-14.4918	-18.7046	-15.3554	-16.5008	-17.2259	-15.3886	-7.43776	-13.1024	-17.4037	-17.1391	-10.753	-10.3079	-11.7563	-13.7294	-12.456	-7.88398	-10.8285	-14.8646	-9.0314	-15.5702	-11.1119	-17.155
Hs6st1	1	36068400	36106446	+	Hs6st1	ENSMUSG00000045216	heparan sulfate 6-O-sulfotransferase 1 [Source:MGI Symbol;Acc:MGI:1354958]	+	gene	Name match	0	0.00140534	0.00666454	-5.60867	-11.2933	-17.4743	-16.0419	-12.6605	-25.7226	-25.5188	-15.4085	-19.9556	-10.9778	-21.2091	-13.6033	-13.632	-22.1696	-16.4927	-15.853	-17.3563	-18.5017	-19.2268	-17.3895	-15.0501	-15.1032	-19.4045	-19.1399	-12.7538	-12.3088	-13.7571	-15.7303	-14.4569	-15.2068	-18.1107	-12.0131	-16.4697	-17.571	-19.219	-19.1558
Arid5a	1	36307733	36324029	+	Arid5a	ENSMUSG00000037447	AT rich interactive domain 5A (MRF1-like) [Source:MGI Symbol;Acc:MGI:2443039]	+	gene	Name match	0	4.02064e-06	2.81639e-05	-4.68239	-12.8774	-22.7607	-23.2562	-15.9112	-20.647	-19.3887	-16.0922	-18.7324	-15.4613	-19.9859	-16.854	-17.2613	-20.9464	-15.2695	-19.4823	-16.1331	-17.2785	-18.0036	-16.1663	-13.8269	-13.8801	-18.1813	-17.9167	-11.5307	-11.0856	-12.534	-14.5071	-13.2337	-13.9836	-16.8875	-15.6423	-15.2465	-16.3479	-17.9958	-17.9327
Kansl3	1	36335730	36369181	-	Kansl3	ENSMUSG00000010453	KAT8 regulatory NSL complex subunit 3 [Source:MGI Symbol;Acc:MGI:1918055]	-	gene	Name match	0	5.77514e-05	0.00034115	-2.8479	-11.0369	-19.0023	-6.98447	-12.0963	-25.5369	-25.3331	-20.8667	-19.7699	-16.4987	-21.0234	-17.8915	-18.2987	-21.9839	-16.307	-20.5198	-17.1706	-13.4636	-19.0411	-17.2038	-14.8644	-14.9175	-19.2188	-18.9542	-12.5682	-12.1231	-13.5714	-15.5446	-14.2712	-15.0211	-17.925	-16.6798	-16.284	-11.9479	-19.0333	-18.9701
Cnnm4	1	36471620	36508764	+	Cnnm4	ENSMUSG00000037408	cyclin M4 [Source:MGI Symbol;Acc:MGI:2151060]	+	gene	Name match	0	5.50614e-05	0.000325963	-6.08748	-11.5612	-17.029	-20.5923	-9.2267	-22.0766	-25.4841	-21.0177	-19.921	-16.6498	-17.0224	-18.0426	-18.4498	-22.135	-9.7669	-20.6708	-17.3217	-18.4671	-19.1922	-17.3549	-15.0155	-15.0686	-19.3699	-19.1053	-12.7192	-12.2742	-13.7225	-15.6957	-14.4223	-15.1722	-14.7541	-16.8309	-9.84012	-17.5364	-19.1843	-14.5769
Cnnm3	1	36511867	36528237	+	Cnnm3	ENSMUSG00000001138	cyclin M3 [Source:MGI Symbol;Acc:MGI:2151055]	+	gene	Name match	0	1.09445e-07	9.53784e-07	-5.23344	-10.7805	-15.4859	-14.8723	-15.9178	-24.506	-20.6907	-19.8357	-18.739	-15.4678	-14.3168	-16.8605	-17.2678	-20.953	-10.8021	-19.4888	-11.9876	-17.2851	-18.0101	-16.1729	-13.8334	-13.8866	-18.1879	-17.9233	-11.5372	-11.0921	-12.5405	-14.5137	-13.2403	-13.9901	-16.894	-15.6489	-15.253	-11.2024	-18.0023	-17.9392
Cox5b	1	36691449	36693681	+	Cox5b	ENSMUSG00000061518	cytochrome c oxidase subunit 5B [Source:MGI Symbol;Acc:MGI:88475]	+	gene	Name match	0	8.48478e-06	5.67529e-05	-2.3605	-11.0494	-19.8931	-11.003	-2.52318	-5.45919	-4.3502	-16.9616	-15.8649	-12.5937	-17.1183	-13.9865	-14.3937	-18.0789	-12.4019	-16.6147	-13.2655	-14.411	-15.1361	-13.2988	-10.9593	-11.0125	-15.3138	-15.0492	-8.66312	-8.21805	-9.66641	-11.6396	-1.98057	-11.1161	-14.0199	-12.7748	-12.3789	-13.4803	-15.1282	-15.0651
Actr1b	1	36698114	36714422	-	Actr1b	ENSMUSG00000037351	ARP1 actin-related protein 1B, centractin beta [Source:MGI Symbol;Acc:MGI:1917446]	-	gene	Name match	0	0.0028936	0.0130197	-3.06739	-9.08514	-22.7617	-17.3503	-15.9123	-20.8891	-20.5597	-19.8302	-18.7335	-15.4623	-19.9869	-16.8551	-17.2623	-20.9475	-15.2706	-19.4833	-16.1342	-17.2796	-18.0047	-16.1674	-13.828	-13.8811	-18.1824	-17.9178	-11.5317	-11.0867	-12.535	-14.5082	-13.2348	-13.9847	-16.8885	-15.6434	-15.2476	-16.3489	-17.9968	-17.9337
Tmem131	1	36792191	36943666	-	Tmem131	ENSMUSG00000026116	transmembrane protein 131 [Source:MGI Symbol;Acc:MGI:1927110]	-	gene	Name match	0	0.00887212	0.0368887	-2.05246	-12.7758	-17.1491	-16.4518	-19.1277	-22.4764	-22.1901	-17.5013	-15.8427	-18.6777	-23.2023	-20.0704	-16.3257	-24.1628	-13.427	-22.6987	-19.3495	-16.095	-21.22	-19.3827	-17.0433	-17.0965	-21.3978	-15.1998	-14.7471	-14.302	-15.7504	-17.7235	-16.4502	-17.2	-20.1039	-13.2473	-13.7873	-15.2423	-21.2122	-17.0902
Gm38115	1	36913601	36916539	-	Gm38115	ENSMUSG00000102930	predicted gene, 38115 [Source:MGI Symbol;Acc:MGI:5611343]	-	gene	Name match	0	0.00125989	0.00602375	-6.98169	-15.7677	-20.2894	-20.785	-13.44	-22.0282	-21.8244	-17.358	-16.2612	-12.9901	-17.5147	-14.3828	-14.7901	-18.4752	-12.7983	-17.0111	-13.6619	-14.8073	-15.5324	-13.6951	-11.3557	-11.4088	-15.7101	-15.4455	-9.05946	-8.61439	-10.0628	-12.0359	-10.7625	-11.5124	-14.4163	-13.1711	-12.7753	-13.8766	-15.5246	-15.4614
Inpp4a	1	37299865	37410736	+	Inpp4a	ENSMUSG00000026113	inositol polyphosphate-4-phosphatase, type I [Source:MGI Symbol;Acc:MGI:1931123]	+	gene	Name match	0	1.7848e-12	2.93679e-11	-4.8043	-11.3198	-15.9955	-26.0224	-11.1591	-27.2657	-21.4504	-16.399	-21.4987	-12.0094	-16.6459	-13.5375	-20.0275	-23.7127	-12.1288	-18.1896	-13.2879	-20.0447	-15.1584	-18.9325	-16.5931	-16.6463	-15.4032	-20.683	-14.2969	-13.8518	-15.3002	-17.2734	-11.3885	-16.7498	-19.6537	-18.4086	-18.0127	-13.5026	-15.1506	-16.0874
Unc50	1	37430139	37439124	+	Unc50	ENSMUSG00000026111	unc-50 homolog [Source:MGI Symbol;Acc:MGI:1914637]	+	gene	Name match	0	1.3291e-09	1.48521e-08	-3.82832	-11.9061	-13.3835	-22.3973	-15.0524	-23.6406	-23.4367	-18.9703	-17.8736	-9.59242	-19.127	-15.9952	-16.4024	-20.0876	-14.4106	-18.6234	-9.21535	-16.4197	-17.1448	-15.3075	-12.968	-13.0212	-17.3225	-17.0579	-10.6718	-10.2267	-11.6751	-13.6483	-12.3749	-13.1248	-16.0286	-14.7835	-14.3876	-15.489	-17.1369	-17.0738
Mgat4a	1	37439340	37541016	-	Mgat4a	ENSMUSG00000026110	mannoside acetylglucosaminyltransferase 4, isoenzyme A [Source:MGI Symbol;Acc:MGI:2662992]	-	gene	Name match	0	0.000314798	0.00166944	-5.01978	-11.1546	-25.402	-17.1568	-11.1621	-27.1408	-21.03	-16.8266	-21.3738	-13.427	-17.7203	-12.8676	-13.4652	-17.8812	-12.6295	-22.1236	-13.8675	-19.9198	-15.1006	-11.9277	-11.5613	-16.5214	-20.8227	-20.5581	-14.172	-13.7269	-15.1753	-17.1484	-15.8751	-16.6249	-19.5288	-13.3768	-13.092	-18.9892	-14.2563	-14.6671
Tsga10	1	37754776	37866429	-	Tsga10	ENSMUSG00000060771	testis specific 10 [Source:MGI Symbol;Acc:MGI:2685063]	-	gene	Name match	0	0.00173894	0.00811894	-5.1596	-12.5057	-17.0407	-18.1663	-14.9506	-23.9539	-27.0719	-17.8686	-21.5088	-18.2376	-22.7622	-19.6304	-20.0376	-23.7228	-18.0459	-22.2586	-18.9095	-20.0549	-20.78	-18.9427	-16.6033	-16.6564	-20.9577	-16.4536	-14.307	-13.862	-15.3103	-17.2835	-16.0101	-11.8006	-19.6638	-18.4187	-18.0229	-19.1242	-20.7721	-16.8566
Mitd1	1	37874801	37890411	-	Mitd1	ENSMUSG00000026088	MIT, microtubule interacting and transport, domain containing 1 [Source:MGI Symbol;Acc:MGI:1916278]	-	gene	Name match	0	3.62346e-06	2.55119e-05	-7.12002	-9.94804	-22.6986	-23.1941	-15.8492	-24.4374	-24.2335	-19.7671	-18.6704	-15.3992	-19.9238	-16.792	-17.1992	-20.8844	-15.2075	-19.4202	-16.0711	-17.2165	-17.9416	-16.1043	-13.7649	-13.818	-13.3823	-17.8547	-11.4686	-11.0236	-12.4719	-14.4451	-13.1717	-13.9216	-16.8254	-15.5803	-15.1845	-16.2858	-17.9337	-17.8706
Mrpl30	1	37890477	37898535	+	Mrpl30	ENSMUSG00000026087	mitochondrial ribosomal protein L30 [Source:MGI Symbol;Acc:MGI:1333820]	+	gene	Name match	0	7.48475e-08	6.66307e-07	-3.35338	-17.223	-21.7447	-22.2402	-14.8953	-6.11469	-23.2797	-18.8132	-17.7165	-14.4453	-18.9699	-15.8381	-16.2453	-19.9305	-14.2536	-18.4663	-15.1172	-16.2626	-16.9877	-15.1504	-12.811	-12.8641	-17.1654	-16.9008	-10.5147	-10.0697	-11.518	-13.4912	-12.2178	-12.9677	-15.8716	-7.54366	-14.2306	-15.3319	-16.9798	-16.9167
Txndc9	1	37985189	37997893	-	Txndc9	ENSMUSG00000058407	thioredoxin domain containing 9 [Source:MGI Symbol;Acc:MGI:2138153]	-	gene	Name match	0	1.34661e-08	1.31632e-07	-3.64719	-12.5578	-22.4014	-18.2855	-15.552	-6.38323	-23.9364	-19.47	-18.3732	-7.98426	-19.6267	-16.4948	-16.9021	-20.5872	-14.9103	-19.1231	-15.7739	-16.9193	-17.6444	-15.8071	-13.4677	-13.5208	-17.8221	-17.5575	-11.1715	-10.7264	-12.1748	-14.1479	-12.8745	-13.6244	-16.5283	-15.2831	-14.8873	-15.9886	-17.6366	-17.5734
Eif5b	1	37998010	38055579	+	Eif5b	ENSMUSG00000026083	eukaryotic translation initiation factor 5B [Source:MGI Symbol;Acc:MGI:2441772]	+	gene	Name match	0	3.24573e-19	1.21471e-17	-6.32477	-11.0342	-24.5814	-25.0769	-17.732	-21.4133	-26.1163	-21.6499	-20.5532	-17.282	-21.8066	-18.6747	-14.608	-22.7671	-17.0902	-21.303	-17.9538	-19.0992	-19.8243	-17.987	-15.6476	-15.7008	-20.0021	-19.7375	-13.3514	-12.9063	-14.3547	-16.3278	-15.0545	-15.8043	-18.7082	-14.1411	-17.0672	-18.1686	-16.3426	-12.4721
Rev1	1	38052786	38129801	-	Rev1	ENSMUSG00000026082	REV1, DNA directed polymerase [Source:MGI Symbol;Acc:MGI:1929074]	-	gene	Name match	0	4.72194e-06	3.27217e-05	-5.64654	-12.3908	-19.7617	-15.5277	-18.1518	-22.5005	-20.9579	-22.0697	-20.973	-17.7018	-22.2264	-19.0946	-19.5018	-23.187	-17.5101	-21.7228	-18.3736	-19.5191	-20.2442	-18.4069	-16.0674	-16.1206	-20.4219	-20.1573	-13.7712	-13.3261	-14.7745	-16.7477	-15.4743	-16.2242	-19.128	-12.3386	-17.4871	-18.5884	-20.2363	-14.3488
Aff3	1	38177326	38664955	-	Aff3	ENSMUSG00000037138	AF4/FMR2 family, member 3 [Source:MGI Symbol;Acc:MGI:106927]	-	gene	Name match	0	0.000419039	0.00218009	-2.06448	-11.7836	-16.4742	-16.8361	-13.5331	-24.2062	-22.9592	-18.6495	-23.6356	-20.3644	-17.3883	-13.8238	-15.3685	-25.8495	-11.4622	-18.7739	-13.9069	-22.1816	-22.9067	-15.4912	-18.73	-12.2388	-16.4247	-18.5804	-16.4338	-15.9887	-17.4371	-19.4102	-12.078	-18.8867	-15.9381	-14.0184	-14.0203	-15.8136	-13.6176	-14.6285
Chst10	1	38863867	38898161	-	Chst10	ENSMUSG00000026080	carbohydrate sulfotransferase 10 [Source:MGI Symbol;Acc:MGI:2138283]	-	gene	Name match	0	3.29434e-06	2.33192e-05	-7.54661	-11.9804	-17.3245	-24.3296	-12.5107	-21.0989	-25.369	-16.1656	-19.8058	-16.5347	-21.0593	-17.9274	-18.3347	-22.0198	-11.2367	-20.5557	-17.2065	-18.3519	-19.077	-17.2397	-14.9003	-14.9535	-19.2547	-18.9901	-12.6041	-12.159	-13.6074	-15.5805	-14.3071	-15.057	-17.9609	-16.7157	-16.3199	-17.4213	-19.0692	-19.006
Pdcl3	1	38985608	38997238	+	Pdcl3	ENSMUSG00000026078	phosducin-like 3 [Source:MGI Symbol;Acc:MGI:1916083]	+	gene	Name match	0	8.40234e-09	8.44767e-08	-3.68923	-13.4303	-22.274	-22.7695	-15.4246	-6.37974	-23.809	-19.3425	-18.2458	-14.9746	-19.4992	-16.3674	-16.7746	-20.4598	-14.7829	-18.9956	-15.6465	-16.7919	-17.517	-15.6797	-13.3403	-13.3934	-17.6947	-17.4301	-11.044	-10.599	-12.0473	-14.0205	-4.3567	-13.497	-16.4009	-15.1557	-14.7599	-15.8612	-17.5091	-17.446
Npas2	1	39193731	39363236	+	Npas2	ENSMUSG00000026077	neuronal PAS domain protein 2 [Source:MGI Symbol;Acc:MGI:109232]	+	gene	Name match	0	1.50067e-05	9.6828e-05	-4.28913	-11.6566	-18.9873	-14.7587	-12.5085	-27.8781	-24.0628	-23.2078	-22.1111	-18.8399	-19.6276	-20.2327	-20.6399	-24.3251	-13.6888	-15.981	-19.5118	-15.5983	-21.3823	-19.545	-17.2056	-17.2587	-21.56	-21.2954	-14.9093	-14.4643	-15.9126	-12.1792	-16.6124	-11.0008	-20.2661	-19.021	-18.6252	-19.7265	-21.3744	-14.5011
Rpl31	1	39367842	39371911	+	Rpl31	ENSMUSG00000073702	ribosomal protein L31 [Source:MGI Symbol;Acc:MGI:2149632]	+	gene	Name match	0	4.42614e-07	3.51318e-06	-4.13312	-16.2374	-20.7591	-21.2547	-13.9097	-10.1438	-22.2941	-12.5464	-16.7309	-13.4598	-17.9844	-14.8525	-15.2598	-18.9449	-13.268	-17.4808	-14.1316	-15.277	-16.0021	-14.1648	-11.8254	-11.8786	-16.1798	-15.9152	-9.52916	-9.08409	-10.5325	-12.5056	-11.2322	-11.9821	-14.886	-13.6408	-13.245	-14.3464	-15.9943	-15.9311
Map4k4	1	39900913	40026310	+	Map4k4	ENSMUSG00000026074	mitogen-activated protein kinase kinase kinase kinase 4 [Source:MGI Symbol;Acc:MGI:1349394]	+	gene	Name match	0	9.13541e-14	1.7575e-12	-6.84837	-10.0613	-16.184	-15.6155	-9.09759	-18.925	-17.3359	-16.2287	-21.6763	-12.2307	-12.9073	-10.4885	-10.7379	-14.0103	-8.14098	-13.869	-10.5155	-11.7712	-13.1807	-10.1834	-8.48944	-11.502	-13.0905	-13.5793	-14.4745	-14.0294	-9.15587	-8.69164	-7.02276	-9.17553	-12.1479	-10.0419	-8.12544	-10.2848	-10.7283	-10.423
Il1r1	1	40225080	40317257	+	Il1r1	ENSMUSG00000026072	interleukin 1 receptor, type I [Source:MGI Symbol;Acc:MGI:96545]	+	gene	Name match	0	6.6867e-36	1.18401e-33	-10.8012	-10.7241	-16.0026	-17.3656	-18.4111	-26.9993	-21.0584	-22.329	-21.2323	-17.9611	-14.9328	-13.8799	-19.7611	-23.4463	-13.9169	-21.9821	-13.3934	-15.7195	-20.5034	-18.6661	-16.3267	-16.3799	-20.6812	-20.4166	-14.0305	-13.5854	-15.0338	-17.007	-15.7336	-16.4834	-19.3873	-18.1422	-17.7463	-18.8477	-14.986	-20.4325
Il1rl2	1	40324610	40367562	+	Il1rl2	ENSMUSG00000070942	interleukin 1 receptor-like 2 [Source:MGI Symbol;Acc:MGI:1913107]	+	gene	Name match	0	3.09577e-11	4.34469e-10	-8.34594	-14.1275	-24.1588	-6.01096	-12.698	-25.8976	-25.6937	-21.2273	-20.1306	-12.6199	-11.8397	-18.2522	-18.6594	-22.3446	-16.6677	-20.8804	-17.5312	-18.6767	-19.4018	-17.5645	-15.225	-15.2782	-19.5795	-19.3149	-12.9288	-12.4837	-13.9321	-15.9053	-14.6319	-15.3818	-12.8857	-17.0405	-16.6447	-17.746	-19.3939	-19.3308
Mrps9	1	42851233	42905683	+	Mrps9	ENSMUSG00000060679	mitochondrial ribosomal protein S9 [Source:MGI Symbol;Acc:MGI:1916777]	+	gene	Name match	0	1.02594e-06	7.70834e-06	-7.31301	-12.9204	-17.8896	-24.9965	-12.7447	-26.2398	-26.0359	-21.5695	-16.0729	-17.2016	-21.7262	-14.635	-19.0016	-22.6868	-17.0099	-21.2226	-17.8734	-19.0189	-19.744	-17.9067	-15.5672	-15.6204	-19.9217	-19.6571	-13.271	-12.8259	-14.2743	-16.2475	-14.9741	-15.724	-18.6278	-17.3827	-16.9869	-18.0882	-19.7361	-19.673
Gpr45	1	42952872	43035456	+	Gpr45	ENSMUSG00000041907	G protein-coupled receptor 45 [Source:MGI Symbol;Acc:MGI:2135882]	+	gene	Name match	0	0.000345355	0.00182178	-6.99553	-12.4798	-16.6738	-15.8088	-18.2525	-26.8407	-26.6369	-22.1705	-16.8342	-17.8025	-22.3272	-15.0433	-15.8656	-23.2877	-17.6108	-21.8235	-18.4744	-14.9442	-20.3449	-18.5076	-16.1682	-16.2213	-20.5226	-20.258	-13.8719	-13.4269	-14.8752	-16.8484	-15.575	-16.3249	-19.2288	-17.9836	-17.5878	-18.6891	-20.3371	-20.2739
Tgfbrap1	1	43047200	43098637	-	Tgfbrap1	ENSMUSG00000070939	transforming growth factor, beta receptor associated protein 1 [Source:MGI Symbol;Acc:MGI:2447427]	-	gene	Name match	0	0.00192844	0.00891958	-6.37152	-14.2216	-15.9181	-16.5288	-17.5695	-26.1577	-22.1014	-15.4047	-20.3907	-17.1195	-21.6441	-18.5122	-18.9195	-22.6047	-16.9277	-21.1405	-17.7913	-14.6973	-19.6618	-17.8246	-15.4851	-15.5383	-19.8396	-19.575	-13.1889	-12.7438	-14.1922	-16.1654	-14.892	-15.6418	-18.5457	-17.3006	-16.9047	-18.0061	-19.654	-19.5909
Fhl2	1	43123074	43196984	-	Fhl2	ENSMUSG00000008136	four and a half LIM domains 2 [Source:MGI Symbol;Acc:MGI:1338762]	-	gene	Name match	0	4.85795e-06	3.36053e-05	-7.57582	-11.6278	-14.9697	-11.2636	-18.0924	-11.3463	-20.2804	-22.0104	-20.9136	-17.6424	-17.3712	-13.3286	-14.1205	-23.1276	-17.4507	-21.6634	-18.3143	-19.4597	-20.1848	-18.3475	-16.0081	-16.0612	-20.3625	-20.0979	-13.7119	-6.14899	-9.8627	-16.6883	-15.4149	-16.1648	-13.9167	-17.8235	-17.4277	-18.529	-20.177	-20.1138
Gm38228	1	43560273	43561565	+	Gm38228	ENSMUSG00000103945	predicted gene, 38228 [Source:MGI Symbol;Acc:MGI:5611456]	+	gene	Name match	0	0.0027937	0.0126037	-4.83694	-9.5731	-19.1048	-19.6004	-12.2554	-20.8436	-20.6398	-16.1734	-15.0766	-11.8055	-16.3301	-13.1982	-13.6054	-17.2906	-11.6137	-15.8265	-12.4773	-13.6227	-14.3478	-12.5105	-10.1711	-10.2242	-14.5255	-14.2609	-7.87486	-7.42978	-8.87815	-10.8513	-9.57793	-10.3278	-13.2317	-11.9865	-11.5907	-12.692	-14.34	-14.2768
Uxs1	1	43746966	43827800	-	Uxs1	ENSMUSG00000057363	UDP-glucuronate decarboxylase 1 [Source:MGI Symbol;Acc:MGI:1915133]	-	gene	Name match	0	5.69661e-06	3.90426e-05	-5.65302	-10.8698	-16.2082	-16.2149	-10.3554	-26.8098	-20.2445	-17.4026	-21.0428	-11.1278	-14.4163	-12.6905	-13.2497	-23.2568	-10.9201	-21.7926	-12.2691	-12.036	-13.5621	-12.2162	-9.94087	-16.1904	-20.4917	-20.2271	-13.841	-13.396	-8.60487	-11.0508	-10.4852	-16.294	-19.1979	-11.1569	-17.5569	-11.7118	-11.8921	-13.2966
Tpp2	1	43933647	44003000	+	Tpp2	ENSMUSG00000041763	tripeptidyl peptidase II [Source:MGI Symbol;Acc:MGI:102724]	+	gene	Name match	0	4.52843e-09	4.74312e-08	-8.51433	-12.4281	-15.2345	-11.9626	-10.5448	-26.5888	-26.385	-21.9185	-20.8218	-17.5506	-17.0653	-18.9434	-14.6751	-23.0358	-17.3589	-17.5127	-18.2225	-19.3679	-20.093	-18.2557	-15.9163	-15.9694	-20.2707	-20.0061	-13.62	-13.175	-14.6233	-16.5965	-11.2642	-16.073	-18.9769	-17.7317	-17.3359	-18.4372	-20.0852	-13.9158
Gm29247	1	44091463	44110790	-	Gm29247	ENSMUSG00000101104	predicted gene 29247 [Source:MGI Symbol;Acc:MGI:5579953]	-	gene	Name match	0	3.69642e-06	2.59999e-05	-6.77785	-12.2886	-16.3001	-19.6498	-16.1573	-24.7455	-24.5417	-20.0753	-18.9785	-15.7073	-20.232	-17.1001	-17.5073	-21.1925	-15.5156	-19.7284	-16.3792	-17.5246	-18.2497	-16.4124	-14.073	-14.1261	-18.4274	-18.1628	-11.7768	-11.3317	-12.7801	-14.7532	-13.4798	-14.2297	-17.1336	-15.8884	-15.4926	-16.5939	-18.2419	-18.1787
Kdelc1	1	44106546	44118808	-	Kdelc1	ENSMUSG00000026047	KDEL (Lys-Asp-Glu-Leu) containing 1 [Source:MGI Symbol;Acc:MGI:1919300]	-	gene	Name match	0	8.36281e-08	7.38831e-07	-8.3913	-10.8186	-22.3504	-22.8459	-15.5009	-24.0891	-23.8853	-19.4189	-18.3221	-15.051	-14.4694	-16.4437	-16.851	-20.5361	-14.8592	-19.072	-15.7228	-16.8682	-17.5933	-15.756	-13.4166	-13.4698	-17.7711	-17.5065	-11.1204	-10.6753	-12.1237	-14.0968	-12.8234	-13.5733	-16.4772	-15.232	-14.8362	-15.9376	-12.6786	-17.5224
Bivm	1	44118957	44144770	+	Bivm	ENSMUSG00000041684	basic, immunoglobulin-like variable motif containing [Source:MGI Symbol;Acc:MGI:2179809]	+	gene	Name match	0	0.000380924	0.00199639	-7.50903	-11.541	-15.0482	-23.9197	-16.5748	-25.163	-24.9591	-20.4927	-19.396	-16.1248	-20.6494	-17.5176	-17.9248	-21.61	-15.933	-20.1458	-16.7966	-17.9421	-18.6672	-16.8299	-14.4904	-14.5436	-18.8449	-18.5803	-12.1942	-11.7491	-13.1975	-15.1707	-13.8973	-14.6472	-17.551	-16.3059	-15.91	-17.0114	-18.6593	-18.5962
Gulp1	1	44551511	44796838	+	Gulp1	ENSMUSG00000056870	GULP, engulfment adaptor PTB domain containing 1 [Source:MGI Symbol;Acc:MGI:1920407]	+	gene	Name match	0	8.08456e-19	2.91823e-17	-5.44653	-12.5313	-16.2146	-7.78282	-12.1477	-20.0259	-24.2483	-17.5892	-22.6445	-19.3733	-15.5027	-13.5588	-16.3774	-21.006	-15.5701	-23.3943	-15.2493	-21.1906	-21.9156	-20.0784	-17.7389	-13.3922	-17.134	-21.8288	-15.4427	-14.9976	-16.446	-18.4192	-17.1458	-17.8956	-20.7995	-19.5544	-12.5471	-20.2599	-18.0554	-21.8447
Gm37626	1	44560885	44565447	+	Gm37626	ENSMUSG00000102319	predicted gene, 37626 [Source:MGI Symbol;Acc:MGI:5610854]	+	gene	Name match	0	0.00293017	0.0131693	-6.13785	-11.443	-20.9241	-21.4196	-14.0747	-22.6629	-22.459	-17.9926	-16.8959	-13.6247	-18.1493	-15.0175	-11.9508	-19.1099	-13.4329	-17.6457	-14.2965	-15.442	-16.1671	-14.3298	-11.9903	-12.0435	-16.3448	-16.0802	-9.69412	-9.24904	-10.6974	-12.6706	-11.3972	-12.1471	-15.0509	-13.8058	-13.4099	-14.5113	-16.1592	-16.0961
Col3a1	1	45311538	45349706	+	Col3a1	ENSMUSG00000026043	collagen, type III, alpha 1 [Source:MGI Symbol;Acc:MGI:88453]	+	gene	Name match	0	6.1284e-37	1.21852e-34	-6.84626	-12.4945	-23.9884	-20.4251	-12.5947	-25.7272	-25.5234	-21.057	-19.9602	-10.1277	-16.8137	-13.4062	-18.4891	-16.9778	-16.4973	-12.2497	-17.3609	-10.1207	-19.2314	-17.3941	-9.41083	-15.1079	-19.4091	-19.1445	-12.7585	-12.3134	-10.0248	-15.7349	-14.4615	-15.2114	-18.1153	-16.8701	-16.4743	-17.5757	-15.3711	-15.549
Col5a2	1	45374321	45503282	-	Col5a2	ENSMUSG00000026042	collagen, type V, alpha 2 [Source:MGI Symbol;Acc:MGI:88458]	-	gene	Name match	0	2.28006e-21	1.03905e-19	-5.37992	-10.4264	-16.9029	-17.055	-9.13248	-19.6879	-17.8378	-17.617	-14.3263	-10.4797	-12.8874	-10.9181	-10.327	-14.3399	-8.18141	-13.6106	-11.1388	-11.627	-13.4608	-11.2912	-7.89761	-11.32	-13.4901	-15.0486	-14.5149	-14.0699	-7.81164	-9.50651	-8.61479	-11.5305	-11.5853	-9.82714	-8.56306	-10.2762	-12.05	-12.1576
Wdr75	1	45795166	45823619	+	Wdr75	ENSMUSG00000025995	WD repeat domain 75 [Source:MGI Symbol;Acc:MGI:1920924]	+	gene	Name match	0	7.69309e-08	6.83487e-07	-7.70487	-13.136	-19.2428	-24.0602	-16.7153	-15.9226	-16.5639	-20.6332	-19.5365	-16.2653	-13.6954	-17.658	-18.0653	-14.5985	-16.0735	-20.2863	-16.9371	-10.9764	-18.8076	-16.9703	-14.6309	-14.6841	-18.9854	-18.7208	-12.3347	-11.8896	-13.338	-15.3112	-14.0378	-14.7876	-17.6915	-16.4464	-12.3136	-17.1519	-13.0932	-18.7367
Slc40a1	1	45908068	45926523	-	Slc40a1	ENSMUSG00000025993	solute carrier family 40 (iron-regulated transporter), member 1 [Source:MGI Symbol;Acc:MGI:1315204]	-	gene	Name match	0	1.54224e-07	1.31127e-06	-7.16272	-10.3297	-22.9401	-23.4357	-16.0907	-24.6789	-24.4751	-20.0087	-18.9119	-15.6407	-20.1654	-17.0335	-17.4407	-21.1259	-15.449	-19.6618	-16.3126	-17.458	-18.1831	-16.3458	-14.0064	-14.0595	-18.3608	-18.0962	-11.7102	-11.2651	-12.7134	-14.6866	-13.4132	-14.1631	-17.067	-15.8218	-15.426	-16.5273	-18.1753	-18.1121
Dnah7b	1	46066315	46373550	+	Dnah7b	ENSMUSG00000041144	dynein, axonemal, heavy chain 7B [Source:MGI Symbol;Acc:MGI:2684953]	+	gene	Name match	0	0.00543782	0.0234278	-4.90778	-12.6406	-16.5974	-13.4418	-15.9959	-23.8837	-22.5989	-17.081	-18.1733	-19.6979	-24.2225	-14.8943	-21.4979	-19.3587	-19.5062	-14.1746	-20.3698	-21.5152	-17.8404	-20.403	-18.0636	-11.8562	-16.7425	-22.1534	-15.7673	-15.3223	-16.7706	-18.7438	-17.4704	-18.2203	-21.1242	-19.879	-19.4832	-20.5845	-14.7676	-22.1693
Slc39a10	1	46807544	46892852	-	Slc39a10	ENSMUSG00000025986	solute carrier family 39 (zinc transporter), member 10 [Source:MGI Symbol;Acc:MGI:1914515]	-	gene	Name match	0	4.69632e-07	3.70613e-06	-7.96282	-12.3252	-18.7113	-25.6443	-11.0493	-20.9282	-26.6837	-16.5417	-21.1205	-17.8494	-18.5215	-19.2421	-19.6494	-23.3345	-8.45302	-21.8704	-18.5212	-19.6666	-20.3917	-18.5544	-16.215	-16.2682	-14.5348	-20.3048	-13.9188	-13.4737	-14.9221	-16.8952	-15.6218	-16.3717	-19.2756	-18.0304	-17.6346	-18.736	-14.8743	-20.3207
Myo1b	1	51749765	51916071	-	Myo1b	ENSMUSG00000018417	myosin IB [Source:MGI Symbol;Acc:MGI:107752]	-	gene	Name match	0	0.0005274	0.00270198	-4.97535	-11.9067	-18.9825	-17.6642	-13.7181	-22.4132	-27.6468	-17.8189	-22.0836	-18.8124	-18.0151	-14.0759	-13.5778	-18.788	-12.1833	-16.981	-12.3323	-12.9858	-15.8452	-19.5175	-17.1781	-17.2312	-21.5325	-12.7985	-14.8818	-14.4368	-15.8851	-17.8583	-11.7891	-17.3348	-14.9992	-13.3821	-18.5977	-14.9032	-21.347	-14.903
Stat1	1	52119440	52161865	+	Stat1	ENSMUSG00000026104	signal transducer and activator of transcription 1 [Source:MGI Symbol;Acc:MGI:103063]	+	gene	Name match	0	0.000530313	0.00271535	-4.00836	-13.1097	-24.141	-24.6365	-17.2916	-16.3333	-25.6759	-15.8876	-20.1128	-16.8416	-21.3662	-18.2344	-18.6416	-22.3268	-16.6498	-20.8626	-17.5134	-18.6589	-19.384	-17.5467	-15.2072	-10.7865	-19.5617	-19.2971	-12.911	-12.4659	-13.9143	-11.4875	-14.6141	-15.3639	-18.2678	-17.0227	-16.6268	-17.7282	-14.7006	-19.313
Gls	1	52163448	52233232	-	Gls	ENSMUSG00000026103	glutaminase [Source:MGI Symbol;Acc:MGI:95752]	-	gene	Name match	0	1.22996e-18	4.35145e-17	-5.95694	-11.2456	-18.3319	-16.9833	-11.4482	-26.5978	-26.3939	-21.9275	-20.8308	-11.4076	-22.0842	-15.2154	-13.9222	-23.0447	-11.6612	-21.5806	-18.2314	-14.2706	-20.1019	-18.2646	-15.9252	-15.9784	-20.2797	-15.4707	-13.629	-13.1839	-14.6323	-16.6054	-15.3321	-16.0819	-18.9858	-17.7406	-17.3448	-18.4462	-15.6942	-20.031
Nab1	1	52457294	52500679	-	Nab1	ENSMUSG00000002881	Ngfi-A binding protein 1 [Source:MGI Symbol;Acc:MGI:107564]	-	gene	Name match	0	7.19477e-15	1.58753e-13	-8.36081	-11.5688	-18.8513	-24.6688	-17.3239	-20.4025	-25.7082	-21.2418	-20.1451	-10.7677	-21.3985	-18.2666	-18.6739	-22.3591	-16.6821	-20.8949	-17.5457	-18.6912	-19.4162	-11.5201	-15.2395	-10.0532	-19.594	-19.3294	-12.9433	-12.4982	-13.9466	-10.5978	-14.6464	-15.3962	-18.3001	-17.055	-16.6591	-17.7605	-19.4084	-19.3453
Gm553	1	52522902	52582679	+	Gm553	ENSMUSG00000100120	predicted gene 553 [Source:MGI Symbol;Acc:MGI:2685399]	+	gene	Name match	0	0.00467692	0.0203866	-5.83396	-11.8326	-16.2453	-17.6305	-11.4054	-26.3745	-26.1706	-21.7042	-20.6075	-13.3769	-21.8609	-13.719	-19.1363	-22.8214	-12.6706	-21.3573	-12.6082	-19.1535	-19.8786	-18.0413	-9.90604	-15.7551	-20.0564	-19.7918	-13.4057	-12.9606	-14.409	-16.3821	-15.1088	-15.8586	-18.7625	-17.5173	-17.1215	-18.2229	-19.8708	-19.8077
Mfsd6	1	52656286	52727462	-	Mfsd6	ENSMUSG00000041439	major facilitator superfamily domain containing 6 [Source:MGI Symbol;Acc:MGI:1922925]	-	gene	Name match	0	7.34377e-10	8.50544e-09	-4.79486	-12.3495	-19.5655	-16.8387	-12.886	-21.9507	-21.2704	-21.956	-20.8592	-17.5881	-22.1127	-18.9808	-19.3881	-23.0732	-17.3963	-21.6091	-18.2599	-19.4053	-20.1304	-18.2931	-15.9537	-16.0069	-20.3082	-20.0436	-13.6575	-13.2124	-14.6608	-16.6339	-15.3605	-16.1104	-19.0143	-17.7691	-17.3733	-13.7991	-20.1226	-20.0595
Inpp1	1	52785427	52817688	-	Inpp1	ENSMUSG00000026102	inositol polyphosphate-1-phosphatase [Source:MGI Symbol;Acc:MGI:104848]	-	gene	Name match	0	1.51716e-09	1.68215e-08	-8.23364	-11.7683	-17.0861	-15.4674	-16.8965	-25.4847	-25.2808	-20.8144	-19.7177	-10.9369	-20.9711	-17.8392	-13.7022	-21.9317	-16.2547	-20.4675	-17.1183	-18.2638	-18.9888	-17.1516	-14.8121	-14.8653	-14.8447	-18.902	-12.5159	-12.0708	-13.5192	-15.4924	-14.219	-14.9688	-17.8727	-16.6276	-16.2317	-17.3331	-18.981	-18.9179
1700019D03Rik	1	52922324	53020179	-	1700019D03Rik	ENSMUSG00000043629	RIKEN cDNA 1700019D03 gene [Source:MGI Symbol;Acc:MGI:1914330]	-	gene	Name match	0	3.97121e-07	3.17759e-06	-6.71104	-12.2053	-16.2758	-15.1366	-12.3009	-27.0855	-22.6422	-17.2188	-21.3185	-18.0473	-22.5719	-19.4401	-19.8473	-23.5325	-17.8556	-16.787	-18.7192	-19.8646	-16.9782	-18.7524	-16.413	-16.4661	-20.7674	-20.5028	-14.1167	-13.6717	-15.12	-17.0932	-15.8198	-16.5697	-19.4735	-18.2284	-17.8326	-18.9339	-20.5818	-20.5187
Gm28778	1	53297111	53318035	+	Gm28778	ENSMUSG00000100679	predicted gene 28778 [Source:MGI Symbol;Acc:MGI:5579484]	+	gene	Name match	0	0.000706835	0.00354424	-5.69609	-12.1077	-23.1213	-19.4648	-11.213	-24.8601	-24.6562	-20.1898	-14.4816	-15.8219	-20.3465	-17.2146	-17.6219	-21.3071	-15.6301	-19.8429	-16.4937	-17.6392	-18.3642	-16.5269	-14.1875	-14.2407	-18.542	-18.2774	-11.8913	-11.4462	-12.8946	-14.8678	-13.5944	-14.3442	-17.2481	-16.003	-15.6071	-16.7085	-18.3564	-18.2933
Osgepl1	1	53313624	53326343	+	Osgepl1	ENSMUSG00000026096	O-sialoglycoprotein endopeptidase-like 1 [Source:MGI Symbol;Acc:MGI:1919335]	+	gene	Name match	0	6.42748e-07	4.96119e-06	-7.47432	-13.2058	-22.4031	-22.8987	-10.4948	-24.1419	-23.9381	-19.4717	-18.3749	-15.1038	-19.6284	-16.4965	-16.9038	-20.5889	-14.912	-19.1248	-15.7756	-16.921	-17.6461	-15.8088	-13.4694	-13.5226	-17.8238	-17.5592	-11.1732	-10.7281	-12.1765	-14.1496	-12.8762	-13.6261	-16.53	-15.2848	-14.889	-15.9904	-17.6383	-17.5751
Gm28551	1	53325507	53352667	-	Gm28551	ENSMUSG00000099913	predicted gene 28551 [Source:MGI Symbol;Acc:MGI:5579257]	-	gene	Name match	0	1.43926e-10	1.84261e-09	-6.53181	-18.9758	-23.4976	-23.9931	-11.2108	-25.2364	-25.0325	-20.5661	-14.1079	-16.1982	-15.5264	-17.5909	-17.9982	-21.6834	-16.0064	-20.2192	-16.87	-18.0155	-18.7405	-16.9033	-14.5638	-8.88002	-18.9183	-18.6537	-12.2676	-11.8225	-13.2709	-15.2441	-13.9707	-14.7205	-17.6244	-16.3793	-15.9834	-17.0848	-18.7327	-13.3883
Asnsd1	1	53344617	53352752	-	Asnsd1	ENSMUSG00000026095	asparagine synthetase domain containing 1 [Source:MGI Symbol;Acc:MGI:1917646]	-	gene	Name match	0	9.51473e-11	1.24867e-09	-5.32167	-17.2367	-21.7584	-22.254	-14.909	-23.4972	-23.2934	-18.827	-17.7302	-14.459	-18.9837	-15.8518	-16.259	-19.9442	-14.2673	-18.4801	-15.1309	-16.2763	-17.0014	-15.1641	-12.8247	-12.8778	-17.1791	-16.9145	-10.5285	-10.0834	-11.5317	-13.5049	-12.2315	-12.9814	-15.8853	-14.6401	-14.2443	-15.3456	-16.9936	-16.9304
Asdurf	1	53348479	53352619	-	Asdurf	ENSMUSG00000117809	Asnsd1 upstream reading frame [Source:NCBI gene;Acc:110599589]	-	gene	Name match	0	0.00716994	0.0303828	-4.22506	-16.2623	-20.7841	-21.2796	-13.9347	-22.5229	-22.319	-17.8526	-16.7559	-13.4847	-18.0093	-14.8775	-15.2847	-18.9699	-13.2929	-17.5057	-14.1565	-15.302	-16.0271	-14.1898	-11.8503	-11.9035	-16.2048	-15.9402	-9.55411	-9.10904	-10.5574	-12.5306	-11.2572	-12.007	-14.9109	-13.6658	-13.2699	-14.3713	-16.0192	-15.9561
Ccdc150	1	54250683	54368727	+	Ccdc150	ENSMUSG00000025983	coiled-coil domain containing 150 [Source:MGI Symbol;Acc:MGI:1925266]	+	gene	Name match	0	0.00235235	0.0107419	6.7239	-13.1491	-25.6173	-17.6708	-12.046	-27.3561	-22.1929	-22.6858	-15.8825	-11.8084	-22.8425	-14.7007	-20.1179	-23.8031	-18.1262	-17.28	-18.9898	-14.9388	-20.8603	-19.023	-16.6836	-16.7367	-15.7161	-20.7734	-14.3873	-13.9423	-10.2844	-17.3638	-16.0904	-11.8303	-19.7441	-18.499	-14.0443	-13.2196	-16.613	-16.245
Gtf3c3	1	54396004	54438971	-	Gtf3c3	ENSMUSG00000041303	general transcription factor IIIC, polypeptide 3 [Source:MGI Symbol;Acc:MGI:2138383]	-	gene	Name match	0	2.39185e-05	0.00014893	-5.90239	-10.5787	-17.5316	-17.2934	-17.3099	-25.8981	-25.6942	-21.2278	-20.1311	-12.123	-21.3845	-10.585	-18.6599	-22.3451	-11.1238	-20.8809	-17.5318	-18.6772	-19.4023	-17.565	-10.0292	-15.2787	-19.58	-19.3154	-12.9293	-12.4843	-13.9326	-15.9058	-14.6324	-10.3234	-18.2861	-17.041	-12.4057	-17.7465	-14.8501	-19.3313
Ankrd44	1	54645340	54926387	-	Ankrd44	ENSMUSG00000052331	ankyrin repeat domain 44 [Source:MGI Symbol;Acc:MGI:3045243]	-	gene	Name match	0	0.0017959	0.00835093	-4.18519	-11.843	-15.9703	-17.0176	-11.0001	-28.6076	-20.7841	-19.3259	-13.4383	-11.7592	-15.7621	-12.7989	-14.1406	-19.545	-10.8902	-17.4842	-14.0231	-21.3867	-22.1118	-14.7649	-11.0148	-12.0033	-14.3826	-16.4135	-15.6388	-15.1937	-9.2047	-18.6153	-17.3419	-18.0917	-15.3518	-12.2586	-12.0941	-13.8446	-13.4925	-14.7908
Sf3b1	1	54985169	55027481	-	Sf3b1	ENSMUSG00000025982	splicing factor 3b, subunit 1 [Source:MGI Symbol;Acc:MGI:1932339]	-	gene	Name match	0	4.58664e-18	1.51713e-16	-5.06209	-12.441	-24.1371	-17.6478	-17.2877	-22.0235	-20.3502	-21.2057	-15.4975	-16.8378	-21.3624	-18.2305	-18.6378	-18.0835	-16.646	-20.8588	-17.5096	-18.655	-19.3801	-17.5428	-15.2034	-15.2566	-19.5578	-19.2932	-12.9072	-12.4621	-13.9105	-15.8836	-14.6102	-15.3601	-18.264	-17.0188	-12.0116	-17.7244	-19.3723	-19.3091
E330011M16Rik	1	55051319	55053112	-	E330011M16Rik	ENSMUSG00000103030	RIKEN cDNA E330011M16 gene [Source:MGI Symbol;Acc:MGI:3704186]	-	gene	Name match	0	0.000279918	0.00149543	-2.29831	-10.38	-19.5773	-20.0728	-8.25395	-21.3161	-21.1122	-16.6458	-15.5491	-12.2779	-16.8025	-13.6707	-7.79662	-17.7631	-12.0861	-16.2989	-12.9497	-14.0952	-14.8203	-12.983	-10.6435	-10.6967	-14.998	-14.7334	-8.34731	-7.90224	-9.35061	-11.3238	-10.0504	-10.8003	-13.7041	-12.459	-12.0631	-13.1645	-14.8124	-14.7493
Coq10b	1	55052770	55072702	+	Coq10b	ENSMUSG00000025981	coenzyme Q10B [Source:MGI Symbol;Acc:MGI:1915126]	+	gene	Name match	0	2.89235e-11	4.07528e-10	-4.28503	-11.705	-23.0512	-23.5467	-11.7279	-24.79	-24.5861	-20.1197	-19.023	-15.7518	-20.2764	-17.1446	-11.2705	-21.237	-15.5601	-19.7728	-16.4236	-17.5691	-18.2942	-16.4569	-14.1174	-14.1706	-18.4719	-18.2073	-11.8212	-11.3761	-12.8245	-14.7977	-13.5243	-14.2742	-17.178	-15.9329	-15.5371	-16.6384	-12.7081	-18.2232
Hspd1	1	55077835	55088243	-	Hspd1	ENSMUSG00000025980	heat shock protein 1 (chaperonin) [Source:MGI Symbol;Acc:MGI:96242]	-	gene	Name match	0	2.8239e-12	4.54159e-11	-7.93851	-10.4067	-22.1139	-22.6094	-15.2645	-23.8527	-23.6488	-19.1824	-18.0857	-14.8145	-19.3391	-16.2072	-16.6145	-20.2997	-14.6227	-18.8355	-15.4863	-16.6318	-17.3568	-15.5195	-13.1801	-13.2333	-17.5346	-17.27	-10.8839	-10.4388	-11.8872	-13.8604	-12.587	-13.3368	-16.2407	-14.9956	-14.5997	-15.7011	-17.349	-17.2859
Hspe1	1	55088132	55091307	+	Hspe1	ENSMUSG00000073676	heat shock protein 1 (chaperonin 10) [Source:MGI Symbol;Acc:MGI:104680]	+	gene	Name match	0	3.24488e-05	0.000197856	-2.82007	-9.79683	-20.4013	-20.8969	-1.33585	-5.67972	-21.9363	-17.4699	-16.3731	-13.1019	-17.6266	-14.4947	-14.9019	-18.5871	-12.9102	-17.1229	-13.7738	-14.9192	-15.6443	-13.807	-11.4676	-11.5207	-15.822	-15.5574	-9.17135	-8.72627	-10.1746	-12.1478	-10.8744	-11.6243	-14.5282	-13.283	-12.8872	-13.9885	-15.6365	-15.5733
Rftn2	1	55170159	55226782	-	Rftn2	ENSMUSG00000025978	raftlin family member 2 [Source:MGI Symbol;Acc:MGI:1921263]	-	gene	Name match	0	0.0122206	0.0497307	-3.60713	-12.734	-14.0903	-25.053	-13.3081	-22.6848	-26.0924	-17.5671	-20.5292	-17.2581	-21.7827	-18.6508	-19.0581	-22.7432	-17.0663	-21.2791	-11.8953	-19.0753	-19.8004	-17.9631	-15.6237	-15.6769	-19.9782	-19.7136	-13.3275	-12.8824	-10.7193	-16.3039	-15.0305	-15.7804	-12.5781	-17.4391	-17.0433	-18.1447	-19.7926	-19.7295
Gm38056	1	55440904	55445930	+	Gm38056	ENSMUSG00000102145	predicted gene, 38056 [Source:MGI Symbol;Acc:MGI:5611284]	+	gene	Name match	0	1.07362e-15	2.65173e-14	-7.03504	-16.5421	-13.7723	-21.5593	-14.2144	-22.8026	-22.5987	-18.1323	-17.0356	-13.7644	-18.289	-15.1572	-15.5644	-19.2496	-13.5727	-17.7854	-14.4363	-15.5817	-16.3068	-14.4695	-12.1301	-12.1832	-16.4845	-16.2199	-9.83383	-9.38876	-10.8371	-12.8103	-11.5369	-12.2868	-15.1906	-13.9455	-13.5497	-14.651	-16.2989	-16.2358
Tyw5	1	57388237	57407101	-	Tyw5	ENSMUSG00000048495	tRNA-yW synthesizing protein 5 [Source:MGI Symbol;Acc:MGI:1915986]	-	gene	Name match	0	0.000226505	0.00123039	-6.81249	-11.9942	-22.9718	-16.6148	-11.0161	-24.7105	-24.5067	-20.0403	-18.9435	-10.5662	-15.045	-17.0651	-17.4724	-16.7576	-15.4806	-19.6934	-16.3442	-17.4896	-18.2147	-16.3774	-14.038	-14.0912	-18.3925	-18.1279	-11.7418	-11.2967	-12.7451	-10.0427	-13.4448	-14.1947	-17.0986	-15.8534	-15.4576	-16.559	-12.0325	-18.1438
Maip1	1	57406328	57417953	+	Maip1	ENSMUSG00000025971	matrix AAA peptidase interacting protein 1 [Source:MGI Symbol;Acc:MGI:1915365]	+	gene	Name match	0	1.18099e-05	7.76084e-05	-6.97965	-10.5884	-14.883	-13.7191	-15.424	-24.0122	-23.8083	-19.3419	-18.2452	-10.6521	-19.4986	-16.3668	-16.774	-20.4592	-14.7822	-18.995	-15.6458	-16.7913	-17.5164	-15.6791	-13.3396	-13.3928	-17.6941	-12.9556	-11.0434	-10.5983	-12.0467	-9.34432	-12.7465	-13.4964	-16.4002	-15.1551	-14.7592	-15.8606	-17.5085	-17.4454
Aox1	1	58029931	58106413	+	Aox1	ENSMUSG00000063558	aldehyde oxidase 1 [Source:MGI Symbol;Acc:MGI:88035]	+	gene	Name match	0	6.10516e-08	5.4982e-07	-6.6308	-12.2621	-15.9843	-17.8111	-13.5303	-26.73	-26.5261	-18.1004	-14.1963	-17.6918	-22.2164	-19.0845	-19.4918	-23.177	-17.5	-21.7128	-18.3636	-19.5091	-20.2341	-18.3969	-16.0574	-16.1106	-20.4119	-20.1473	-13.7612	-13.3161	-14.7645	-16.7377	-15.4643	-16.2141	-19.118	-17.8729	-11.9675	-18.5784	-20.2263	-20.1632
Aox3	1	58113130	58200698	+	Aox3	ENSMUSG00000064294	aldehyde oxidase 3 [Source:MGI Symbol;Acc:MGI:1918974]	+	gene	Name match	0	0.00348256	0.0154857	-5.37848	-12.7118	-17.575	-18.6845	-13.3271	-26.9253	-26.7214	-22.255	-21.1583	-17.8871	-18.0118	-19.2798	-19.6871	-23.3722	-17.6953	-21.9081	-12.1975	-19.7043	-20.4294	-18.5921	-16.2527	-16.3059	-20.6072	-20.3426	-13.9565	-13.5114	-10.3483	-16.9329	-15.6596	-16.4094	-19.3133	-18.0682	-17.6723	-18.7737	-20.4216	-20.3585
Bzw1	1	58392898	58407353	+	Bzw1	ENSMUSG00000051223	basic leucine zipper and W2 domains 1 [Source:MGI Symbol;Acc:MGI:1914132]	+	gene	Name match	0	1.94843e-26	1.48176e-24	-10.3149	-9.70938	-15.6808	-13.236	-15.7383	-24.3265	-24.1226	-19.6562	-18.5595	-15.2883	-19.8129	-16.6811	-17.0883	-20.7735	-15.0966	-19.3093	-15.9602	-17.1056	-17.8307	-15.9934	-13.654	-13.7071	-18.0084	-17.7438	-11.3577	-10.9127	-12.361	-14.3342	-13.0608	-13.8107	-16.7145	-15.4694	-15.0736	-16.1749	-17.8228	-17.7597
Clk1	1	58410189	58424066	-	Clk1	ENSMUSG00000026034	CDC-like kinase 1 [Source:MGI Symbol;Acc:MGI:107403]	-	gene	Name match	0	8.29837e-35	1.34249e-32	-6.78815	-12.4628	-15.4461	-16.1581	-15.6794	-17.1269	-17.7825	-13.9535	-18.5006	-15.2295	-19.7541	-16.6222	-17.0295	-20.7146	-15.0377	-19.2505	-9.02137	-17.0467	-17.7718	-15.9345	-13.5951	-13.6483	-17.9495	-17.6849	-11.2989	-10.8538	-12.3022	-14.2753	-13.0019	-13.7518	-16.6557	-15.4105	-15.0147	-16.1161	-17.764	-17.7008
Ppil3	1	58430994	58445486	-	Ppil3	ENSMUSG00000026035	peptidylprolyl isomerase (cyclophilin)-like 3 [Source:MGI Symbol;Acc:MGI:1917475]	-	gene	Name match	0	1.26492e-08	1.24055e-07	-8.3416	-18.0696	-22.5914	-16.2207	-15.742	-24.3302	-24.1263	-19.6599	-18.5632	-15.292	-19.8166	-16.6848	-17.092	-20.7772	-15.1002	-19.313	-15.9638	-17.1093	-17.8344	-15.9971	-13.6576	-13.7108	-18.0121	-17.7475	-11.3614	-10.9163	-12.3647	-14.3379	-13.0645	-13.8144	-16.7182	-15.4731	-15.0772	-16.1786	-17.8265	-17.7634
Nif3l1	1	58445151	58481816	+	Nif3l1	ENSMUSG00000026036	Ngg1 interacting factor 3-like 1 (S. pombe) [Source:MGI Symbol;Acc:MGI:1929485]	+	gene	Name match	0	1.98947e-09	2.17534e-08	-4.37144	-15.7973	-23.9305	-11.634	-12.1742	-20.4729	-18.3022	-15.7595	-19.9023	-16.6311	-21.1557	-12.2571	-14.1916	-22.1163	-16.4393	-20.6521	-17.3029	-18.4484	-15.2141	-17.3362	-14.9967	-15.0499	-19.3512	-19.0866	-12.7005	-12.2554	-13.7038	-15.677	-9.92965	-15.1534	-18.0573	-10.7533	-12.2643	-17.5177	-14.9262	-19.1025
Fam126b	1	58522806	58586323	-	Fam126b	ENSMUSG00000038174	family with sequence similarity 126, member B [Source:MGI Symbol;Acc:MGI:1098784]	-	gene	Name match	0	1.20319e-07	1.0409e-06	-6.26501	-11.1187	-17.1618	-16.3118	-13.5519	-26.462	-26.2581	-18.3178	-20.695	-17.4238	-21.9484	-18.8166	-19.2238	-22.909	-17.2321	-21.4448	-18.0957	-19.2411	-19.9662	-18.1289	-15.7895	-15.8426	-20.1439	-19.8793	-13.4932	-13.0482	-14.4965	-16.4697	-15.1963	-15.9462	-18.85	-17.6049	-17.2091	-18.3104	-19.9583	-19.8952
Ndufb3	1	58586384	58595964	+	Ndufb3	ENSMUSG00000026032	NADH:ubiquinone oxidoreductase subunit B3 [Source:MGI Symbol;Acc:MGI:1913745]	+	gene	Name match	0	0.00267177	0.0120827	-1.94313	-17.4725	-21.9943	-22.4898	-2.32134	-6.58844	-23.5292	-13.0282	-17.9661	-14.6949	-13.9382	-16.0877	-16.4949	-20.1801	-8.89171	-18.7159	-15.3667	-16.5122	-17.2373	-15.4	-13.0605	-13.1137	-17.415	-17.1504	-10.7643	-10.3192	-11.7676	-13.7408	-12.4674	-13.2172	-16.1211	-14.876	-14.4801	-15.5815	-17.2294	-17.1663
Cflar	1	58711508	58758884	+	Cflar	ENSMUSG00000026031	CASP8 and FADD-like apoptosis regulator [Source:MGI Symbol;Acc:MGI:1336166]	+	gene	Name match	0	2.55628e-08	2.40689e-07	-5.6661	-10.1068	-18.4203	-17.4839	-11.5709	-19.887	-25.8352	-16.0073	-20.272	-17.0008	-21.5255	-18.3936	-12.8675	-22.486	-16.8091	-21.0218	-17.6727	-18.8181	-19.5432	-17.7059	-15.3665	-15.4196	-19.7209	-19.4563	-13.0702	-12.6252	-14.0735	-16.0467	-14.7733	-15.5232	-18.4271	-17.1819	-16.7861	-17.8874	-19.5354	-19.4722
Trak2	1	58900449	58973430	-	Trak2	ENSMUSG00000026028	trafficking protein, kinesin binding 2 [Source:MGI Symbol;Acc:MGI:1918077]	-	gene	Name match	0	1.02361e-05	6.77539e-05	-6.44848	-11.7302	-20.3793	-16.7514	-11.1278	-26.6624	-26.4585	-21.9921	-12.1584	-17.6242	-22.1488	-19.0169	-19.4242	-23.1094	-17.4324	-21.6452	-18.296	-19.4415	-20.1665	-18.3293	-15.9898	-16.043	-20.3443	-20.0797	-13.6936	-13.2485	-14.6969	-16.6701	-15.3967	-16.1465	-19.0504	-17.8053	-17.4094	-18.5108	-20.1587	-20.0956
Stradb	1	58973522	58995715	+	Stradb	ENSMUSG00000026027	STE20-related kinase adaptor beta [Source:MGI Symbol;Acc:MGI:2144047]	+	gene	Name match	0	0.0046089	0.0201221	-1.82931	-13.5325	-23.2062	-16.6918	-16.3568	-6.42702	-24.7411	-20.2747	-19.178	-15.9068	-20.4314	-17.2996	-17.7068	-21.392	-15.7151	-19.9278	-16.5787	-17.7241	-18.4492	-16.6119	-14.2725	-14.3256	-18.6269	-18.3623	-11.9762	-11.5312	-12.9795	-14.9527	-13.6793	-14.4292	-17.333	-16.0879	-15.6921	-8.41742	-18.4413	-18.3782
Tmem237	1	59100590	59120408	-	Tmem237	ENSMUSG00000038079	transmembrane protein 237 [Source:MGI Symbol;Acc:MGI:2138365]	-	gene	Name match	0	3.07083e-09	3.27915e-08	-4.01	-12.9097	-23.0429	-15.148	-16.1935	-24.7817	-24.5779	-20.1115	-19.0147	-15.7435	-20.2682	-17.1363	-17.5435	-21.2287	-15.5518	-19.7645	-16.4154	-17.5608	-18.2859	-16.4486	-14.1092	-14.1623	-18.4636	-18.199	-11.8129	-11.3679	-12.8162	-14.7894	-13.516	-14.2659	-17.1698	-15.9246	-15.5288	-16.6301	-18.2781	-18.2149
Als2	1	59162926	59237231	-	Als2	ENSMUSG00000026024	alsin Rho guanine nucleotide exchange factor [Source:MGI Symbol;Acc:MGI:1921268]	-	gene	Name match	0	0.00269958	0.0122023	4.41099	-11.9404	-6.83732	-5.14966	-12.7002	-19.6659	-26.4845	-22.018	-20.9213	-17.6501	-22.1747	-19.0429	-19.4501	-23.1353	-17.4584	-21.6711	-18.322	-19.4674	-20.1925	-18.3552	-11.2199	-16.0689	-20.3702	-15.1987	-13.7195	-13.2745	-14.7228	-16.696	-15.4226	-16.1725	-19.0764	-17.8312	-17.4354	-18.5367	-15.0785	-20.1215
Fzd7	1	59482424	59486955	+	Fzd7	ENSMUSG00000041075	frizzled class receptor 7 [Source:MGI Symbol;Acc:MGI:108570]	+	gene	Name match	0	0.000268788	0.00143899	-5.3958	-10.6859	-20.9143	-18.0879	-14.0649	-22.6531	-22.4492	-13.6609	-16.8861	-13.6149	-18.1395	-15.0076	-15.4149	-19.1	-13.4231	-17.6359	-14.2867	-15.4321	-16.1572	-14.3199	-11.9805	-12.0337	-16.335	-16.0704	-9.68428	-9.23921	-10.6876	-12.6607	-11.3874	-12.1372	-15.0411	-13.7959	-13.4001	-14.5015	-16.1494	-16.0863
Sumo1	1	59586558	59670834	-	Sumo1	ENSMUSG00000026021	small ubiquitin-like modifier 1 [Source:MGI Symbol;Acc:MGI:1197010]	-	gene	Name match	0	2.88831e-21	1.30454e-19	-5.35446	-11.8575	-14.8512	-16.9511	-12.9203	-9.49563	-21.7592	-16.5883	-21.103	-13.4319	-17.0751	-19.2245	-15.2319	-16.6731	-11.3795	-21.8528	-18.5036	-19.6491	-20.3741	-13.8613	-12.0454	-16.2506	-20.5519	-20.2873	-13.9012	-13.4561	-14.9045	-16.8777	-15.6043	-16.3541	-19.258	-18.0129	-17.617	-18.7184	-14.4329	-20.3032
Nop58	1	59684971	59719044	+	Nop58	ENSMUSG00000026020	NOP58 ribonucleoprotein [Source:MGI Symbol;Acc:MGI:1933184]	+	gene	Name match	0	2.16269e-16	5.80922e-15	-5.8605	-19.303	-23.8247	-24.3202	-16.9753	-21.8265	-25.3596	-20.8932	-19.7965	-16.5253	-21.0499	-17.9181	-18.3253	-22.0105	-16.3336	-20.5463	-17.1972	-18.3426	-19.0677	-17.2304	-14.891	-14.9441	-19.2454	-18.9808	-12.5947	-12.1497	-13.598	-15.5712	-14.2978	-15.0477	-17.9515	-16.7064	-16.3106	-17.4119	-19.0598	-18.9967
Bmpr2	1	59763400	59879014	+	Bmpr2	ENSMUSG00000067336	bone morphogenetic protein receptor, type II (serine/threonine kinase) [Source:MGI Symbol;Acc:MGI:1095407]	+	gene	Name match	0	1.16225e-18	4.12419e-17	-6.03026	-11.9769	-14.9626	-18.0482	-12.9712	-27.3261	-27.1222	-15.344	-17.1592	-10.7522	-16.6382	-13.4843	-14.9359	-23.7731	-18.0961	-15.9671	-18.9597	-20.1052	-20.8303	-18.993	-16.6535	-16.7067	-15.856	-20.7434	-14.3573	-13.9122	-15.3606	-17.3338	-16.0604	-16.8103	-19.7141	-12.1075	-11.382	-19.1745	-20.8224	-20.7593
Fam117b	1	59913006	59985346	+	Fam117b	ENSMUSG00000041040	family with sequence similarity 117, member B [Source:MGI Symbol;Acc:MGI:1920000]	+	gene	Name match	0	0.00766782	0.0323271	-4.2146	-11.6635	-17.7931	-25.4064	-13.45	-26.6497	-21.1645	-17.9205	-20.8826	-17.6115	-22.1361	-19.0042	-19.4115	-23.0966	-17.4197	-21.6325	-18.2833	-19.4287	-20.1538	-18.3165	-15.9771	-16.0303	-20.3316	-20.067	-13.6809	-13.2358	-9.57797	-16.6573	-15.3839	-16.1338	-19.0377	-17.7925	-17.3967	-18.4981	-15.6017	-20.0829
Wdr12	1	60069785	60098645	-	Wdr12	ENSMUSG00000026019	WD repeat domain 12 [Source:MGI Symbol;Acc:MGI:1927241]	-	gene	Name match	0	0.000232118	0.00125858	-3.76194	-10.6306	-15.1948	-20.6068	-11.3358	-25.324	-25.1201	-20.6537	-19.557	-16.2858	-20.8104	-17.6785	-18.0858	-21.771	-16.094	-20.3068	-9.89872	-18.103	-18.8281	-16.9908	-14.6514	-14.7046	-19.0059	-18.7413	-12.3552	-11.9101	-13.3585	-15.3316	-14.0583	-14.8081	-17.712	-16.4669	-16.071	-17.1724	-18.8203	-18.7572
Carf	1	60098247	60153953	+	Carf	ENSMUSG00000026017	calcium response factor [Source:MGI Symbol;Acc:MGI:2182269]	+	gene	Name match	0	0.00108024	0.0052473	-5.00462	-11.2827	-24.5339	-21.2925	-17.6845	-16.8516	-26.0688	-21.6024	-20.5057	-17.2345	-21.7591	-18.6273	-19.0345	-22.7197	-17.0428	-21.2555	-17.9063	-19.0518	-19.7769	-17.9396	-15.6001	-15.6533	-19.9546	-19.69	-13.3039	-12.8588	-14.3072	-16.2804	-15.007	-15.7569	-18.6607	-17.4156	-17.0198	-18.1211	-19.769	-19.7059
Nbeal1	1	60180599	60338328	+	Nbeal1	ENSMUSG00000073664	neurobeachin like 1 [Source:MGI Symbol;Acc:MGI:2444343]	+	gene	Name match	0	6.56968e-32	8.32105e-30	-6.98084	-11.6928	-16.9675	-18.0391	-12.4794	-11.9317	-27.5704	-16.0331	-15.9726	-12.1578	-23.2607	-20.1288	-16.0621	-24.2212	-13.1828	-17.3196	-15.5554	-20.5533	-21.2784	-19.4411	-17.1017	-12.3024	-18.3041	-21.1915	-14.8054	-14.3604	-15.8087	-17.7819	-16.5085	-17.2584	-20.1623	-18.9171	-18.5213	-13.7157	-21.2706	-16.1485
Cyp20a1	1	60343323	60388060	+	Cyp20a1	ENSMUSG00000049439	cytochrome P450, family 20, subfamily a, polypeptide 1 [Source:MGI Symbol;Acc:MGI:1925201]	+	gene	Name match	0	1.8425e-16	5.02501e-15	-7.05364	-11.5326	-24.2175	-24.7131	-12.0868	-21.7169	-20.6936	-15.0255	-20.1893	-16.9182	-21.4428	-18.3109	-18.7182	-22.4033	-16.7264	-20.9392	-17.59	-18.7354	-19.4605	-17.6232	-15.2838	-15.337	-19.6382	-19.3736	-12.9876	-12.5425	-13.9909	-15.964	-14.6906	-15.4405	-18.3444	-17.0992	-16.7034	-17.8048	-19.4527	-19.3895
6030460B20Rik	1	60353119	60354176	+	6030460B20Rik	ENSMUSG00000103822	RIKEN cDNA 6030460B20 gene [Source:MGI Symbol;Acc:MGI:1924974]	+	gene	Name match	0	0.00338812	0.0150865	-6.08033	-14.2937	-18.8155	-19.311	-11.966	-20.5542	-20.3504	-15.884	-14.7872	-11.5161	-16.0407	-12.9088	-13.3161	-17.0012	-11.3243	-15.5371	-12.1879	-13.3333	-14.0584	-12.2211	-9.8817	-9.93486	-14.2362	-13.9716	-7.58547	-7.1404	-8.58877	-10.5619	-9.28855	-10.0384	-12.9423	-11.6971	-11.3013	-12.4027	-14.0506	-13.9875
Abi2	1	60409619	60481158	+	Abi2	ENSMUSG00000026782	abl-interactor 2 [Source:MGI Symbol;Acc:MGI:106913]	+	gene	Name match	0	7.1352e-14	1.3877e-12	-8.56411	-11.5593	-24.8948	-16.7385	-18.0454	-21.4372	-26.4297	-21.9633	-20.8666	-13.8584	-17.3831	-11.2512	-15.3365	-23.0806	-13.3447	-21.6164	-18.2672	-19.4127	-20.1378	-18.3005	-15.961	-16.0142	-20.3155	-20.0509	-13.6648	-13.2197	-14.6681	-16.6413	-15.3679	-16.1177	-19.0216	-17.7765	-13.5282	-18.482	-20.1299	-20.0668
Raph1	1	60482292	60567104	-	Raph1	ENSMUSG00000026014	Ras association (RalGDS/AF-6) and pleckstrin homology domains 1 [Source:MGI Symbol;Acc:MGI:1924550]	-	gene	Name match	0	0.00508316	0.0220064	-2.03353	-12.1674	-18.4185	-8.10001	-13.384	-15.4941	-26.6753	-22.2089	-21.1121	-17.8409	-22.3656	-14.6223	-19.6409	-23.3261	-17.6492	-21.8619	-18.5128	-19.6582	-20.3833	-18.546	-10.6283	-16.2597	-20.561	-20.2964	-13.9103	-13.4653	-14.9136	-16.8868	-15.6134	-16.3633	-19.2672	-18.022	-17.6262	-18.7275	-20.3755	-20.3123
Pard3b	1	61638824	62642284	+	Pard3b	ENSMUSG00000052062	par-3 family cell polarity regulator beta [Source:MGI Symbol;Acc:MGI:1919301]	+	gene	Name match	0	6.91761e-08	6.18915e-07	-3.62871	-12.3614	-16.7343	-17.2852	-13.1996	-23.9879	-23.6955	-18.1868	-19.2393	-14.0151	-16.6514	-15.7155	-15.9037	-21.2151	-13.1134	-25.4265	-15.6585	-16.3703	-16.1234	-12.0562	-12.2616	-14.28	-17.8443	-16.7203	-17.4749	-17.0298	-18.4782	-20.4514	-12.6684	-12.9429	-17.0948	-14.7481	-13.2973	-22.2921	-16.7219	-15.7591
Nrp2	1	62703285	62818695	+	Nrp2	ENSMUSG00000025969	neuropilin 2 [Source:MGI Symbol;Acc:MGI:1100492]	+	gene	Name match	0	0.00532256	0.0229646	-5.72501	-11.621	-15.7393	-17.9858	-11.5065	-23.4711	-21.4131	-18.0418	-21.5565	-13.6098	-17.073	-14.2407	-14.1785	-17.261	-11.6378	-16.9844	-11.5957	-13.5412	-14.2834	-13.5905	-12.7986	-13.2302	-13.6055	-15.097	-14.3548	-13.9097	-10.9581	-17.3312	-16.0578	-12.9553	-19.7116	-14.227	-13.9186	-12.9325	-14.3825	-14.0656
Ino80d	1	62958418	63114667	-	Ino80d	ENSMUSG00000040865	INO80 complex subunit D [Source:MGI Symbol;Acc:MGI:3027003]	-	gene	Name match	0	1.3569e-06	1.00569e-05	-6.17037	-11.1807	-18.8364	-16.3654	-11.763	-22.0851	-22.0124	-23.0904	-21.9936	-18.7224	-18.4512	-15.3193	-13.911	-24.2076	-13.0933	-22.7434	-12.2423	-20.5397	-21.2648	-12.6316	-17.0881	-17.1412	-15.2682	-16.271	-14.7918	-14.3468	-10.3212	-17.7683	-16.4949	-17.2448	-20.1487	-12.8689	-12.3113	-19.609	-17.6455	-16.7199
Ino80dos	1	63113078	63158290	+	Ino80dos	ENSMUSG00000084799	INO80 complex subunit D, opposite strand [Source:MGI Symbol;Acc:MGI:3651861]	+	gene	Name match	0	0.00233589	0.0106709	-4.43098	-8.77031	-15.8424	-15.0083	-12.5875	-18.9867	-19.5496	-21.3013	-20.2046	-16.9334	-21.458	-12.3412	-11.909	-22.4186	-16.7416	-20.9544	-12.5463	-12.5326	-19.4757	-17.6385	-9.14702	-11.3928	-13.0096	-19.3889	-13.0028	-12.5577	-14.0061	-15.9793	-9.64698	-15.4557	-18.3596	-17.1145	-10.4373	-12.4201	-19.4679	-14.3459
Ndufs1	1	63143596	63176833	-	Ndufs1	ENSMUSG00000025968	NADH:ubiquinone oxidoreductase core subunit S1 [Source:MGI Symbol;Acc:MGI:2443241]	-	gene	Name match	0	1.15181e-12	1.94193e-11	-5.78709	-9.79771	-14.4009	-8.45735	-16.9395	-25.5277	-18.5719	-20.8574	-14.8538	-16.4895	-21.0141	-12.7302	-18.2895	-21.9747	-16.2977	-20.5105	-12.1024	-18.3068	-19.0318	-17.1945	-8.70312	-10.9489	-13.3297	-18.945	-12.5589	-12.1138	-13.5622	-15.5354	-9.20308	-15.0118	-17.9157	-16.6706	-9.99344	-17.3761	-19.024	-13.902
Eef1b2	1	63176825	63180486	+	Eef1b2	ENSMUSG00000025967	eukaryotic translation elongation factor 1 beta 2 [Source:MGI Symbol;Acc:MGI:1929520]	+	gene	Name match	0	1.9576e-15	4.67289e-14	-4.68556	-7.86153	-20.6067	-21.1023	-13.7573	-22.3455	-22.1417	-17.6753	-16.5785	-13.3074	-17.832	-14.7001	-15.1074	-18.7925	-13.1156	-17.3284	-13.9792	-15.1246	-15.8497	-14.0124	-11.673	-11.7262	-16.0274	-15.7628	-9.37677	-8.93169	-10.3801	-12.3532	-11.0798	-11.8297	-14.7336	-13.4884	-13.0926	-14.194	-15.8419	-15.7787
Klf7	1	64029447	64122282	-	Klf7	ENSMUSG00000025959	Kruppel-like factor 7 (ubiquitous) [Source:MGI Symbol;Acc:MGI:1935151]	-	gene	Name match	0	7.88197e-12	1.18767e-10	-4.27402	-10.7098	-25.2707	-17.775	-18.4213	-27.0095	-26.8057	-17.4868	-21.2425	-17.9713	-18.4371	-13.5397	-19.7713	-18.9826	-17.7796	-13.6067	-18.6432	-19.7886	-20.5137	-18.6764	-16.337	-12.9162	-20.6914	-20.4268	-14.0407	-13.5957	-15.044	-17.0172	-15.7438	-16.4937	-19.3976	-18.1524	-17.7566	-18.8579	-20.5059	-20.4427
Gm26649	1	64029463	64032927	+	Gm26649	ENSMUSG00000097272	predicted gene, 26649 [Source:MGI Symbol;Acc:MGI:5477143]	+	gene	Name match	0	6.94579e-06	4.70334e-05	-3.41311	-11.9463	-20.527	-14.2558	-13.6776	-22.2658	-22.0619	-17.5955	-16.4988	-13.2276	-17.7522	-14.6203	-15.0276	-18.7128	-13.0358	-17.0966	-13.8994	-15.0449	-15.7699	-13.9326	-11.5932	-11.6464	-15.9477	-15.6831	-9.29699	-8.85192	-10.3003	-12.2735	-11.0001	-11.7499	-14.6538	-13.4087	-13.0128	-14.1142	-15.7621	-15.699
Creb1	1	64532645	64604548	+	Creb1	ENSMUSG00000025958	cAMP responsive element binding protein 1 [Source:MGI Symbol;Acc:MGI:88494]	+	gene	Name match	0	2.01219e-12	3.29571e-11	-8.71388	-12.2858	-21.5802	-18.3387	-18.0527	-26.6409	-26.437	-21.9706	-20.8739	-17.6027	-22.1273	-18.9955	-19.4027	-19.029	-13.937	-18.1498	-18.2746	-19.42	-16.6711	-18.3078	-15.9684	-11.4101	-14.679	-20.0582	-13.6721	-13.2271	-14.6754	-16.6486	-10.0533	-11.6511	-19.0289	-17.7838	-12.7124	-18.4893	-14.4307	-20.0741
Plekhm3	1	64785983	64956824	-	Plekhm3	ENSMUSG00000051344	pleckstrin homology domain containing, family M, member 3 [Source:MGI Symbol;Acc:MGI:2443627]	-	gene	Name match	0	1.27564e-09	1.42771e-08	-8.45817	-11.4868	-8.84515	-19.1543	-12.9793	-23.4895	-27.6856	-17.5126	-17.4469	-18.8512	-18.1795	-20.244	-16.6919	-20.1844	-12.2221	-22.8723	-15.0492	-13.4397	-21.3936	-15.5969	-17.2169	-17.27	-12.6249	-21.3067	-14.9207	-14.4756	-15.9239	-17.8971	-16.6237	-12.8997	-20.2775	-19.0323	-18.6365	-19.7378	-16.1463	-21.3226
Idh1	1	65158616	65186500	-	Idh1	ENSMUSG00000025950	isocitrate dehydrogenase 1 (NADP+), soluble [Source:MGI Symbol;Acc:MGI:96413]	-	gene	Name match	0	5.42388e-35	8.89592e-33	-10.903	-11.4955	-13.6253	-15.6454	-10.5799	-25.2743	-19.5261	-14.7516	-19.5073	-16.2361	-20.7608	-17.6289	-18.0361	-21.7213	-11.1375	-20.2572	-16.908	-18.0534	-18.7785	-16.9412	-14.6018	-14.6549	-18.9562	-14.1473	-12.3056	-11.8605	-13.3088	-15.282	-14.0086	-14.7585	-17.6624	-16.4172	-12.1689	-17.1227	-13.2611	-18.7075
Pikfyve	1	65186683	65278695	+	Pikfyve	ENSMUSG00000025949	phosphoinositide kinase, FYVE type zinc finger containing [Source:MGI Symbol;Acc:MGI:1335106]	+	gene	Name match	0	0.0010096	0.00491823	-4.83154	-9.9898	-15.0211	-18.5246	-12.4751	-26.9967	-26.7928	-17.715	-15.8682	-17.9585	-22.4831	-14.8773	-14.7991	-23.4437	-12.8074	-17.0201	-18.6303	-19.7758	-20.5008	-18.6636	-16.3241	-16.3773	-13.4181	-15.9401	-14.0279	-13.5828	-15.0312	-17.0044	-15.731	-16.4808	-19.3847	-18.1396	-13.5917	-18.8451	-20.493	-20.4299
Rpe	1	66700831	66719805	+	Rpe	ENSMUSG00000026005	ribulose-5-phosphate-3-epimerase [Source:MGI Symbol;Acc:MGI:1913896]	+	gene	Name match	0	3.04325e-14	6.20702e-13	-8.845	-11.897	-22.9801	-15.5293	-16.1307	-24.7189	-24.5151	-20.0487	-18.9519	-15.6808	-15.7314	-17.0735	-17.4808	-17.429	-15.489	-13.619	-16.3526	-17.498	-18.2231	-16.3858	-14.0464	-14.0996	-18.4008	-18.1362	-11.7502	-11.3051	-12.7535	-14.7266	-13.4532	-14.2031	-17.107	-15.8618	-15.466	-16.5674	-18.2153	-18.1521
Kansl1l	1	66719248	66817562	-	Kansl1l	ENSMUSG00000026004	KAT8 regulatory NSL complex subunit 1-like [Source:MGI Symbol;Acc:MGI:1915941]	-	gene	Name match	0	1.06587e-10	1.38602e-09	-8.37432	-12.8983	-16.9726	-25.849	-14.352	-21.1074	-22.5665	-17.27	-16.2664	-13.3785	-22.5787	-19.4468	-19.8541	-23.5392	-17.8623	-22.0751	-18.7259	-19.8713	-20.5964	-18.7591	-16.4197	-16.4729	-20.7742	-15.9652	-14.1235	-13.6784	-15.1268	-17.0999	-15.8265	-16.5764	-14.8689	-18.2351	-17.8393	-18.9407	-15.9771	-20.5255
Acadl	1	66830839	66863277	-	Acadl	ENSMUSG00000026003	acyl-Coenzyme A dehydrogenase, long-chain [Source:MGI Symbol;Acc:MGI:87866]	-	gene	Name match	0	5.88063e-10	6.88705e-09	-3.94329	-11.4507	-19.9013	-15.8589	-16.9044	-7.69673	-25.2887	-20.8223	-19.7256	-10.5475	-20.979	-17.8471	-18.2544	-21.9396	-16.2626	-20.4754	-17.1262	-18.2717	-18.9967	-17.1594	-14.82	-14.8732	-19.1745	-18.9099	-12.5238	-12.0787	-13.5271	-15.5003	-14.2269	-14.9767	-17.8806	-16.6355	-16.2396	-17.341	-14.3775	-18.9258
Lancl1	1	67000517	67038872	-	Lancl1	ENSMUSG00000026000	LanC (bacterial lantibiotic synthetase component C)-like 1 [Source:MGI Symbol;Acc:MGI:1336997]	-	gene	Name match	0	1.36588e-12	2.28016e-11	-7.28338	-11.5144	-14.318	-24.491	-11.3502	-21.5823	-21.4715	-16.3271	-19.9673	-16.6961	-21.2207	-18.0889	-18.4961	-22.1813	-16.5043	-16.3172	-11.6924	-18.5134	-19.2385	-17.4012	-15.0617	-15.1149	-15.6792	-19.1516	-12.7655	-12.3204	-13.7688	-15.742	-14.4686	-15.2185	-12.3265	-16.8772	-16.4813	-17.5827	-15.3782	-15.3151
Atic	1	71557150	71579631	+	Atic	ENSMUSG00000026192	5-aminoimidazole-4-carboxamide ribonucleotide formyltransferase/IMP cyclohydrolase [Source:MGI Symbol;Acc:MGI:1351352]	+	gene	Name match	0	1.99915e-05	0.000125999	-5.65601	-11.3514	-23.2248	-18.8134	-16.3754	-24.9636	-24.7597	-20.2933	-13.7227	-15.9254	-20.45	-17.3182	-13.1811	-21.4106	-15.7337	-19.9464	-16.5973	-17.7427	-18.4678	-16.6305	-14.2911	-14.3442	-18.6455	-18.3809	-11.9948	-11.5498	-12.9981	-14.9713	-13.6979	-14.4478	-17.3516	-16.1065	-15.7107	-16.812	-18.4599	-18.3968
Fn1	1	71585520	71653200	-	Fn1	ENSMUSG00000026193	fibronectin 1 [Source:MGI Symbol;Acc:MGI:95566]	-	gene	Name match	0	6.83236e-16	1.74191e-14	-5.143	-11.3145	-16.4244	-25.3103	-13.1695	-26.5536	-26.3497	-21.8833	-20.7866	-12.078	-17.8006	-18.9082	-19.3154	-23.0006	-17.3236	-21.5364	-18.1872	-19.3327	-20.0578	-18.2205	-15.881	-15.9342	-20.2355	-19.9709	-13.5848	-13.1397	-14.5881	-16.5613	-15.2879	-16.0378	-18.9416	-17.6965	-17.3006	-18.402	-20.0499	-19.9868
D230017M19Rik	1	72236465	72274869	+	D230017M19Rik	ENSMUSG00000097131	RIKEN cDNA D230017M19 gene [Source:MGI Symbol;Acc:MGI:2445071]	+	gene	Name match	0	0.00983218	0.0405583	5.79714	-13.0017	-23.9973	-8.14414	-17.1479	-19.7768	-25.5323	-21.0659	-19.9691	-16.698	-21.2226	-18.0907	-18.4979	-22.1831	-12.6537	-20.719	-17.3698	-18.5152	-19.2403	-17.403	-15.0636	-15.1167	-19.418	-19.1534	-12.7674	-12.3223	-13.7707	-15.7438	-7.19948	-15.2203	-18.1242	-16.879	-16.4832	-17.5845	-19.2325	-19.1693
Xrcc5	1	72307427	72394952	+	Xrcc5	ENSMUSG00000026187	X-ray repair complementing defective repair in Chinese hamster cells 5 [Source:MGI Symbol;Acc:MGI:104517]	+	gene	Name match	0	0.00193549	0.00894856	-6.33209	-12.2174	-15.1898	-25.6813	-18.3363	-26.9245	-26.7207	-17.2443	-21.1575	-17.8864	-22.411	-19.2791	-15.142	-23.3715	-17.6946	-21.9074	-18.5582	-19.7036	-20.4287	-14.2695	-16.252	-16.3052	-15.4101	-20.3419	-13.9558	-13.5107	-14.9591	-16.9322	-15.6588	-16.4087	-19.3126	-18.0674	-17.6716	-18.773	-20.4209	-20.3578
Smarcal1	1	72583251	72633134	+	Smarcal1	ENSMUSG00000039354	SWI/SNF related matrix associated, actin dependent regulator of chromatin, subfamily a-like 1 [Source:MGI Symbol;Acc:MGI:1859183]	+	gene	Name match	0	0.00152909	0.00719579	-5.34735	-11.516	-15.9842	-24.8701	-17.5252	-26.1134	-20.5876	-21.4431	-20.3464	-17.0752	-15.8933	-18.468	-18.8752	-22.5604	-16.8835	-21.0962	-17.7471	-18.8925	-15.6582	-17.7803	-15.4409	-15.494	-19.7953	-19.5307	-13.1446	-12.6996	-14.1479	-16.1211	-14.8477	-15.5976	-18.5015	-17.2563	-16.8605	-17.9618	-19.6098	-19.5466
Rpl37a	1	72711290	72713813	+	Rpl37a	ENSMUSG00000046330	ribosomal protein L37a [Source:MGI Symbol;Acc:MGI:98068]	+	gene	Name match	0	2.02713e-08	1.93737e-07	-2.55004	-15.5481	-16.2174	-20.5654	-13.2204	-6.3732	-21.6048	-17.1384	-16.0416	-12.7704	-2.83656	-14.1632	-14.5704	-18.2556	-12.5787	-16.7914	-13.4423	-14.5877	-15.3128	-13.4755	-11.1361	-11.1892	-15.4905	-15.2259	-8.83985	-8.39477	-9.84314	-11.8163	-10.5429	-11.2928	-14.1967	-12.9515	-12.5557	-5.43357	-15.305	-15.2418
Tns1	1	73910231	74124449	-	Tns1	ENSMUSG00000055322	tensin 1 [Source:MGI Symbol;Acc:MGI:104552]	-	gene	Name match	0	6.24318e-13	1.08232e-11	-3.88713	-11.2641	-16.6246	-10.1119	-12.7342	-11.4077	-20.8266	-17.036	-15.1471	-10.6769	-18.124	-12.7602	-14.1818	-16.3816	-12.4589	-17.3462	-15.8901	-14.7344	-21.72	-15.6433	-17.5433	-12.9209	-21.8978	-15.7532	-15.2471	-14.802	-16.2504	-12.6792	-16.9501	-17.7	-20.6039	-14.6218	-12.8567	-20.0643	-17.6533	-21.6491
Aamp	1	74279840	74284738	-	Aamp	ENSMUSG00000006299	angio-associated migratory protein [Source:MGI Symbol;Acc:MGI:107809]	-	gene	Name match	0	4.72647e-19	1.74141e-17	-8.57423	-16.5049	-21.0266	-21.5221	-14.1772	-22.7654	-22.5615	-13.2427	-16.9984	-10.1158	-18.2518	-15.12	-15.5272	-19.2124	-13.5355	-17.7482	-14.3991	-15.5445	-16.2696	-14.4323	-12.0928	-12.146	-16.4473	-16.1827	-9.79662	-9.35155	-10.7999	-12.7731	-11.4997	-12.2496	-15.1534	-13.9083	-13.5125	-14.6138	-16.2617	-16.1986
Gm28364	1	74281161	74281866	+	Gm28364	ENSMUSG00000101503	predicted gene 28364 [Source:MGI Symbol;Acc:MGI:5579070]	+	gene	Name match	0	0.00016338	0.0009056	-4.5323	-13.7101	-18.2319	-18.7274	-11.3824	-19.9706	-19.7668	-15.3004	-14.2036	-10.9325	-15.4571	-12.3252	-12.7325	-16.4176	-10.7407	-14.9535	-11.6043	-12.7497	-13.4748	-11.6375	-9.2981	-9.35126	-13.6526	-13.388	-7.00187	-6.5568	-8.00517	-9.97834	-8.70495	-9.45481	-12.3587	-11.1135	-10.7177	-11.8191	-13.467	-13.4039
Pnkd	1	74284930	74353694	+	Pnkd	ENSMUSG00000026179	paroxysmal nonkinesiogenic dyskinesia [Source:MGI Symbol;Acc:MGI:1930773]	+	gene	Name match	0	0.00060233	0.00305595	-2.16107	-11.5201	-15.2428	-19.9718	-14.3769	-10.1412	-21.3627	-21.9062	-16.1339	-12.0644	-17.2105	-12.8722	-13.6014	-17.9173	-11.9851	-17.015	-18.2102	-19.3556	-20.0807	-18.2434	-15.904	-15.9571	-20.2584	-14.5564	-13.6077	-13.1627	-14.611	-16.5842	-15.3108	-16.0607	-18.9646	-17.7194	-17.3236	-13.8806	-20.0728	-13.6289
Tmbim1	1	74288247	74305622	-	Tmbim1	ENSMUSG00000006301	transmembrane BAX inhibitor motif containing 1 [Source:MGI Symbol;Acc:MGI:1916910]	-	gene	Name match	0	9.83119e-18	3.09648e-16	-7.41789	-12.1133	-13.4893	-17.9872	-16.0037	-24.5919	-24.3881	-19.9217	-18.8249	-15.5538	-20.0784	-16.9465	-11.9923	-21.0389	-10.0005	-15.0304	-16.2256	-17.371	-18.0961	-16.2588	-13.9194	-13.9725	-18.2738	-12.5718	-11.6232	-11.1781	-12.6265	-14.5996	-13.3262	-14.0761	-16.98	-15.7348	-15.339	-11.896	-18.0883	-11.6443
Ctdsp1	1	74391509	74397285	+	Ctdsp1	ENSMUSG00000026176	CTD (carboxy-terminal domain, RNA polymerase II, polypeptide A) small phosphatase 1 [Source:MGI Symbol;Acc:MGI:2654470]	+	gene	Name match	0	1.77463e-05	0.000112868	-3.56318	-16.7427	-21.2644	-21.76	-14.415	-14.2738	-22.7994	-18.333	-17.2362	-13.965	-18.4897	-15.3578	-15.765	-19.4502	-13.7733	-17.9861	-14.6369	-15.7823	-16.5074	-14.6701	-12.3307	-12.3838	-16.6851	-16.4205	-10.0345	-9.58938	-11.0377	-13.0109	-11.7375	-12.4874	-15.3913	-14.1461	-13.7503	-14.8516	-16.4996	-11.8921
Usp37	1	74435511	74544284	-	Usp37	ENSMUSG00000033364	ubiquitin specific peptidase 37 [Source:MGI Symbol;Acc:MGI:2442483]	-	gene	Name match	0	6.79215e-05	0.000396554	-2.60553	-11.5611	-9.64032	-6.34684	-12.176	-20.5315	-20.3124	-13.43	-16.3649	-11.8982	-14.7083	-14.0831	-12.1406	-16.2293	-12.1837	-14.8401	-10.7197	-13.4389	-20.7423	-12.9201	-16.5655	-8.70516	-20.92	-20.6554	-14.2693	-13.8243	-9.26263	-12.5088	-15.9724	-11.3608	-16.0147	-12.2517	-10.614	-11.992	-13.8275	-14.8469
Cnot9	1	74506058	74530842	+	Cnot9	ENSMUSG00000026174	CCR4-NOT transcription complex, subunit 9 [Source:MGI Symbol;Acc:MGI:1928902]	+	gene	Name match	0	1.85239e-13	3.40364e-12	-9.21101	-10.9369	-15.3806	-16.3871	-12.6637	-25.1043	-18.5196	-15.8897	-19.3373	-10.1592	-14.4845	-17.4589	-11.9592	-14.8757	-15.8744	-15.2347	-16.738	-17.8834	-18.6085	-16.7712	-14.4318	-14.4849	-18.7862	-18.5216	-12.1355	-11.6905	-13.1388	-15.112	-13.8386	-9.22701	-17.4923	-16.2472	-15.8514	-10.0592	-18.6006	-12.7131
Plcd4	1	74542888	74567794	+	Plcd4	ENSMUSG00000026173	phospholipase C, delta 4 [Source:MGI Symbol;Acc:MGI:107469]	+	gene	Name match	0	0.00106675	0.00518317	-2.23476	-11.9709	-4.8013	-9.45873	-11.1233	-17.926	-18.398	-13.4065	-15.1924	-16.0732	-12.2859	-17.466	-17.8732	-21.5584	-15.8814	-15.8547	-16.745	-11.7843	-18.6156	-12.4563	-14.4388	-14.492	-18.7933	-18.5287	-12.1426	-11.6975	-13.1459	-9.87961	-13.8457	-14.5956	-17.4994	-16.2543	-15.8584	-16.9598	-18.6077	-14.9332
Zfp142	1	74565127	74588246	-	Zfp142	ENSMUSG00000026135	zinc finger protein 142 [Source:MGI Symbol;Acc:MGI:1924514]	-	gene	Name match	0	1.10747e-06	8.29462e-06	-6.27101	-9.78407	-14.4585	-23.7607	-16.4158	-25.004	-20.5607	-16.8598	-15.085	-15.9658	-20.4904	-17.3585	-17.7658	-21.451	-15.774	-16.6649	-11.7307	-17.7831	-18.5081	-12.9339	-14.3314	-14.3846	-18.6859	-12.7774	-12.0352	-11.5901	-13.0385	-15.0117	-13.7383	-14.4881	-17.392	-16.1469	-15.751	-12.241	-18.5003	-18.4372
Ttll4	1	74661745	74703730	+	Ttll4	ENSMUSG00000033257	tubulin tyrosine ligase-like family, member 4 [Source:MGI Symbol;Acc:MGI:1914784]	+	gene	Name match	0	2.05516e-07	1.71864e-06	-7.22136	-11.1761	-15.6702	-16.4034	-17.2765	-18.3818	-19.3591	-10.8053	-20.0977	-12.7677	-13.4443	-11.5916	-10.3608	-14.9023	-8.98295	-12.7589	-8.87066	-12.7639	-12.8771	-10.2922	-15.1922	-7.0219	-19.5467	-19.2821	-12.896	-12.4509	-8.321	-8.50126	-14.599	-9.41555	-11.3865	-10.7264	-11.0004	-8.71881	-12.4812	-13.824
Cyp27a1	1	74713574	74737892	+	Cyp27a1	ENSMUSG00000026170	cytochrome P450, family 27, subfamily a, polypeptide 1 [Source:MGI Symbol;Acc:MGI:88594]	+	gene	Name match	0	2.72165e-24	1.71749e-22	-9.55884	-7.58889	-23.3381	-23.8337	-16.4887	-12.0784	-24.8731	-13.7155	-19.3099	-16.0387	-20.5634	-17.4315	-12.3292	-21.5239	-10.447	-20.0597	-11.6044	-17.856	-18.5811	-16.7438	-14.4044	-14.4575	-18.7588	-18.4942	-12.1081	-11.6631	-13.1114	-15.0846	-13.8112	-7.18026	-13.2255	-16.2198	-15.824	-16.9253	-18.5733	-14.1882
Cnppd1	1	75134554	75142711	-	Cnppd1	ENSMUSG00000033159	cyclin Pas1/PHO80 domain containing 1 [Source:MGI Symbol;Acc:MGI:1916421]	-	gene	Name match	0	8.4058e-05	0.000483704	-7.67358	-9.58873	-21.7623	-22.2579	-14.9129	-23.5011	-23.2973	-18.8309	-17.7341	-14.4629	-18.9876	-15.8557	-16.2629	-19.9481	-14.2712	-18.4839	-15.1348	-16.2802	-17.0053	-15.168	-12.8286	-12.8817	-17.183	-16.9184	-10.5324	-10.0873	-11.5356	-13.5088	-12.2354	-12.9853	-15.8892	-14.644	-14.2482	-15.3495	-16.9975	-16.9343
Retreg2	1	75142778	75147913	+	Retreg2	ENSMUSG00000049339	reticulophagy regulator family member 2 [Source:MGI Symbol;Acc:MGI:2388278]	+	gene	Name match	0	1.78599e-06	1.30203e-05	-7.02634	-8.08561	-21.0948	-21.5903	-10.7714	-22.8336	-22.6297	-18.1633	-17.0666	-13.7954	-18.32	-15.1881	-15.5954	-19.2805	-13.6036	-17.8164	-14.4672	-15.6126	-16.3377	-14.5004	-12.161	-12.2142	-16.5155	-16.2509	-9.86478	-9.41971	-10.8681	-12.8412	-11.5679	-12.3177	-15.2216	-13.9764	-13.5806	-14.682	-16.3299	-16.2668
Zfand2b	1	75168646	75171629	+	Zfand2b	ENSMUSG00000026197	zinc finger, AN1 type domain 2B [Source:MGI Symbol;Acc:MGI:1916068]	+	gene	Name match	0	0.00192879	0.0089199	-4.63151	-10.1782	-20.3114	-20.8069	-9.06202	-17.8982	-21.8463	-17.3799	-16.2832	-13.012	-17.5366	-14.4047	-14.812	-18.4971	-12.8202	-17.033	-13.6838	-9.9768	-15.5543	-13.717	-11.3776	-11.4308	-15.7321	-15.4675	-9.08138	-8.63631	-10.0847	-12.0578	-10.7845	-11.5343	-14.4382	-13.193	-12.7972	-13.8986	-15.5465	-15.4834
Atg9a	1	75180860	75192196	-	Atg9a	ENSMUSG00000033124	autophagy related 9A [Source:MGI Symbol;Acc:MGI:2138446]	-	gene	Name match	0	0.00489395	0.0212467	-3.7845	-8.9267	-22.2371	-22.7326	-15.3877	-23.9759	-19.4501	-19.3056	-18.2089	-14.9377	-19.4623	-11.134	-16.7377	-20.4229	-8.30853	-18.9587	-15.6095	-16.755	-17.48	-15.6428	-13.3033	-13.3565	-17.6578	-17.3932	-11.0071	-10.562	-12.0104	-13.9836	-12.7102	-13.46	-16.3639	-15.1188	-14.7229	-15.8243	-17.4722	-17.4091
Glb1l	1	75198236	75210813	-	Glb1l	ENSMUSG00000026200	galactosidase, beta 1-like [Source:MGI Symbol;Acc:MGI:1921827]	-	gene	Name match	0	0.00237867	0.0108497	-6.21225	-10.3913	-22.3869	-14.4968	-15.5375	-24.1257	-23.9219	-19.4555	-18.3587	-15.0876	-19.6122	-12.0804	-16.8876	-20.5727	-14.8958	-19.1086	-15.7594	-16.9048	-17.6299	-15.7926	-13.4532	-13.5064	-17.8076	-17.543	-11.157	-10.7119	-12.1603	-14.1334	-12.86	-13.6099	-16.5138	-10.0292	-14.8728	-15.9742	-17.6221	-17.5589
Stk16	1	75210838	75215606	+	Stk16	ENSMUSG00000026201	serine/threonine kinase 16 [Source:MGI Symbol;Acc:MGI:1313271]	+	gene	Name match	0	3.43236e-10	4.14949e-09	-7.6623	-10.5861	-20.9878	-21.4833	-14.1384	-19.1152	-22.5227	-18.0563	-16.9596	-13.6884	-18.213	-15.0812	-15.4884	-19.1736	-13.4967	-17.7094	-14.3602	-15.5057	-16.2308	-14.3935	-12.054	-12.1072	-16.4085	-16.1439	-9.75782	-9.31275	-10.7611	-12.7343	-11.4609	-12.2108	-15.1146	-13.8695	-13.4737	-14.575	-16.2229	-16.1598
Tuba4a	1	75214228	75219865	-	Tuba4a	ENSMUSG00000026202	tubulin, alpha 4A [Source:MGI Symbol;Acc:MGI:1095410]	-	gene	Name match	0	1.53096e-05	9.84434e-05	-6.66434	-11.6487	-21.2293	-21.7248	-9.42053	-19.3567	-22.7642	-18.2978	-17.2011	-8.49251	-18.4545	-15.3227	-15.7299	-19.4151	-8.12671	-17.9509	-14.6017	-15.7472	-16.4723	-14.635	-12.2955	-12.3487	-16.65	-16.3854	-9.99932	-9.55425	-11.0026	-12.9758	-11.7024	-12.4523	-15.3561	-14.111	-13.7151	-14.8165	-16.4644	-16.4013
A630095N17Rik	1	75220095	75232102	-	A630095N17Rik	ENSMUSG00000096094	RIKEN cDNA A630095N17 gene [Source:MGI Symbol;Acc:MGI:2686470]	-	gene	Name match	0	0.00951846	0.0393371	-5.38799	-17.7983	-22.32	-22.8156	-15.4706	-24.0588	-23.855	-19.3886	-18.2918	-15.0207	-19.5453	-16.4134	-16.8207	-20.5058	-14.8289	-19.0417	-15.6925	-16.8379	-17.563	-15.7257	-13.3863	-13.4394	-17.7407	-17.4761	-11.0901	-10.645	-12.0934	-14.0665	-12.7931	-13.543	-16.4469	-15.2017	-14.8059	-15.9072	-17.5552	-17.492
Dnajb2	1	75236406	75245692	+	Dnajb2	ENSMUSG00000026203	DnaJ heat shock protein family (Hsp40) member B2 [Source:MGI Symbol;Acc:MGI:1928739]	+	gene	Name match	0	2.44889e-05	0.000152109	-7.2714	-11.1258	-21.9493	-22.4449	-15.0999	-20.7288	-23.4843	-19.0179	-17.9211	-10.7975	-19.1746	-16.0427	-16.4499	-20.1351	-14.4582	-18.6709	-15.3218	-16.4672	-17.1923	-15.355	-13.0156	-13.0687	-17.37	-17.1054	-10.7193	-10.2743	-11.7226	-13.6958	-12.4224	-13.1723	-16.0762	-14.831	-14.4352	-10.7407	-17.1845	-17.1213
Dnpep	1	75307896	75317990	-	Dnpep	ENSMUSG00000026209	aspartyl aminopeptidase [Source:MGI Symbol;Acc:MGI:1278328]	-	gene	Name match	0	2.37007e-19	8.94518e-18	-8.9502	-13.489	-17.6698	-13.3825	-15.2203	-14.0381	-23.6046	-19.1382	-18.0415	-10.2964	-19.2949	-16.163	-16.5703	-20.2555	-14.5785	-14.5518	-15.4421	-16.5876	-17.3126	-15.4754	-13.1359	-13.1891	-17.4904	-17.2258	-10.8397	-10.3946	-11.843	-13.8162	-12.5428	-13.2926	-16.1965	-14.9514	-14.5555	-15.6569	-17.3048	-17.2417
Des	1	75360329	75368579	+	Des	ENSMUSG00000026208	desmin [Source:MGI Symbol;Acc:MGI:94885]	+	gene	Name match	0	0.000225571	0.00122659	6.48879	-12.1049	-17.6267	-22.2742	-8.94438	-4.94227	-23.3136	-18.8472	-17.7505	-8.62685	-19.0039	-15.872	-16.2793	-7.52101	-14.2875	-18.5003	-15.1511	-16.2966	-17.0216	-15.1844	-1.25413	-12.8981	-17.1994	-16.9348	-10.5487	-10.1036	-11.552	-13.5252	-0.444689	-13.0016	-15.9055	-14.6604	-14.2645	-15.3659	-17.0138	-16.9507
Gmppa	1	75435930	75443179	+	Gmppa	ENSMUSG00000033021	GDP-mannose pyrophosphorylase A [Source:MGI Symbol;Acc:MGI:1916330]	+	gene	Name match	0	0.00412203	0.0181098	-5.88946	-13.4589	-13.0521	-22.0876	-9.68379	-23.3309	-23.127	-18.6606	-17.5639	-9.14071	-12.536	-10.833	-16.0927	-19.7779	-14.1009	-18.3137	-10.0052	-16.11	-16.8351	-14.9978	-12.6583	-12.7115	-17.0128	-16.7482	-10.3621	-9.91704	-11.3654	-13.3386	-12.0652	-12.8151	-15.7189	-14.4738	-9.01905	-10.3269	-16.8272	-16.7641
Chpf	1	75474569	75479307	-	Chpf	ENSMUSG00000032997	chondroitin polymerizing factor [Source:MGI Symbol;Acc:MGI:106576]	-	gene	Name match	0	5.06761e-12	7.8623e-11	-9.10746	-12.135	-15.4344	-21.4742	-14.1293	-22.7175	-22.5136	-13.7253	-16.9505	-13.6793	-18.2039	-15.0721	-15.4793	-19.1645	-13.4875	-17.7003	-14.3511	-15.4966	-16.2217	-14.3844	-12.0449	-6.69818	-16.3994	-16.1348	-9.74872	-9.30364	-10.752	-12.7252	-11.4518	-7.96219	-15.1055	-9.38645	-13.4645	-14.5659	-16.2138	-16.1507
Obsl1	1	75479310	75506452	-	Obsl1	ENSMUSG00000026211	obscurin-like 1 [Source:MGI Symbol;Acc:MGI:2138628]	-	gene	Name match	0	0.000244582	0.00132013	-4.44258	-10.7301	-19.8852	-15.6017	-16.6472	-21.4985	-25.0316	-16.3257	-19.4684	-11.2379	-20.7218	-17.59	-17.9972	-21.6824	-16.0055	-20.2182	-16.8691	-18.0145	-18.7396	-16.9023	-14.5629	-14.616	-18.9173	-18.6527	-12.2666	-11.8216	-8.53297	-15.2431	-13.9697	-14.7196	-17.6235	-16.3783	-15.9825	-17.0838	-18.7318	-18.6686
Stk11ip	1	75521529	75537335	+	Stk11ip	ENSMUSG00000026213	serine/threonine kinase 11 interacting protein [Source:MGI Symbol;Acc:MGI:1918978]	+	gene	Name match	0	0.000420631	0.00218774	-5.21237	-13.399	-14.628	-23.2121	-10.761	-24.4554	-24.2515	-19.7851	-18.6884	-15.4172	-19.9418	-16.81	-17.2172	-20.9024	-15.2255	-19.4382	-16.0891	-17.2345	-17.9596	-16.1223	-13.7829	-13.836	-18.1373	-17.8727	-11.4866	-11.0416	-12.4899	-14.4631	-13.1897	-13.9396	-16.8434	-15.5983	-15.2025	-16.3038	-17.9517	-17.8886
Slc4a3	1	75546266	75562172	+	Slc4a3	ENSMUSG00000006576	solute carrier family 4 (anion exchanger), member 3 [Source:MGI Symbol;Acc:MGI:109350]	+	gene	Name match	0	6.21924e-05	0.000365443	-5.19179	-11.2446	-22.7257	-14.8308	-15.8763	-24.4645	-24.2606	-15.3943	-18.6975	-15.4263	-19.9509	-16.8191	-17.2263	-20.9115	-15.2346	-19.4473	-16.0982	-17.2436	-17.9687	-16.1314	-13.792	-13.8451	-18.1464	-17.8818	-11.4957	-11.0507	-12.499	-14.4722	-13.1988	-13.9487	-16.8525	-15.6074	-15.2116	-16.3129	-17.9608	-17.8977
Epha4	1	77367185	77515088	-	Epha4	ENSMUSG00000026235	Eph receptor A4 [Source:MGI Symbol;Acc:MGI:98277]	-	gene	Name match	0	1.32451e-05	8.63225e-05	-6.41107	-10.783	-16.271	-16.4644	-14.2974	-27.6814	-20.6251	-23.0112	-21.9144	-18.6432	-17.7679	-15.299	-20.4432	-17.3915	-18.4515	-22.6642	-19.3151	-20.4605	-16.8637	-13.5524	-10.95	-12.5881	-21.3633	-21.0987	-14.7127	-14.2676	-15.7159	-17.6891	-16.4157	-17.1656	-14.6695	-18.8243	-18.4285	-19.5298	-21.1778	-16.9626
Farsb	1	78417975	78488897	-	Farsb	ENSMUSG00000026245	phenylalanyl-tRNA synthetase, beta subunit [Source:MGI Symbol;Acc:MGI:1346035]	-	gene	Name match	0	0.00531752	0.022954	-5.7695	-12.2543	-16.4967	-18.6867	-12.5233	-19.2499	-20.8729	-21.9508	-20.8541	-17.5829	-22.1075	-15.2387	-15.061	-19.1087	-17.3911	-17.4519	-18.2547	-13.8906	-20.1253	-18.288	-15.9485	-16.0017	-20.303	-20.0384	-13.6523	-13.2072	-14.6556	-16.6288	-9.74395	-11.4938	-19.0091	-17.764	-13.6312	-15.1476	-16.506	-13.9481
Acsl3	1	78657825	78707743	+	Acsl3	ENSMUSG00000032883	acyl-CoA synthetase long-chain family member 3 [Source:MGI Symbol;Acc:MGI:1921455]	+	gene	Name match	0	0.00685599	0.029216	-4.22621	-12.1396	-15.9852	-24.8712	-12.3742	-26.1144	-25.9106	-21.4442	-20.3474	-17.0762	-21.6009	-13.5096	-18.8762	-22.5614	-16.8845	-15.7358	-17.7481	-12.8589	-19.6186	-17.7813	-15.4419	-10.8836	-19.7963	-19.5317	-13.1457	-12.7006	-8.95255	-16.1221	-14.8487	-15.5986	-18.5025	-13.1984	-16.8615	-17.9628	-15.8738	-19.5476
Utp14b	1	78658038	78671512	+	Utp14b	ENSMUSG00000079470	UTP14B small subunit processome component [Source:MGI Symbol;Acc:MGI:2445092]	+	gene	Name match	0	3.19458e-06	2.26536e-05	-6.12831	-11.9057	-22.4863	-22.9819	-15.6369	-24.2251	-24.0213	-19.5549	-18.4581	-15.1869	-19.7116	-12.4277	-16.9869	-20.6721	-14.9952	-15.0559	-15.8588	-17.0042	-17.7293	-15.892	-13.5526	-13.6057	-17.907	-17.6424	-11.2563	-10.8113	-12.2596	-14.2328	-12.9594	-13.7093	-16.6132	-15.368	-14.9722	-16.0735	-17.7215	-17.6583
Wdfy1	1	79702262	79776143	-	Wdfy1	ENSMUSG00000073643	WD repeat and FYVE domain containing 1 [Source:MGI Symbol;Acc:MGI:1916618]	-	gene	Name match	0	6.80037e-14	1.3262e-12	-5.0032	-13.0387	-15.1709	-18.208	-12.3251	-9.00191	-26.4762	-16.0764	-16.3016	-17.6419	-17.0145	-13.5251	-13.3126	-23.1271	-17.4501	-21.6629	-18.3137	-19.4591	-14.0322	-18.3469	-16.0075	-16.0607	-20.362	-20.0974	-13.7113	-13.2662	-9.56258	-16.6877	-9.67739	-16.1642	-14.3925	-10.2872	-11.1052	-18.5285	-20.1764	-20.1133
Mrpl44	1	79776018	79781445	+	Mrpl44	ENSMUSG00000026248	mitochondrial ribosomal protein L44 [Source:MGI Symbol;Acc:MGI:1916413]	+	gene	Name match	0	0.000686508	0.0034496	-6.24474	-16.6528	-21.1745	-21.6701	-14.3251	-22.9133	-16.9725	-18.2431	-17.1463	-13.8751	-18.3998	-15.2679	-15.6751	-19.3603	-13.6834	-17.8962	-14.547	-15.6924	-16.4175	-14.5802	-12.2408	-12.2939	-16.5952	-16.3306	-9.94456	-9.49948	-10.9479	-12.921	-11.6476	-12.3975	-15.3014	-14.0562	-13.6604	-14.7617	-16.4097	-16.3465
Serpine2	1	79794197	79861180	-	Serpine2	ENSMUSG00000026249	serine (or cysteine) peptidase inhibitor, clade E, member 2 [Source:MGI Symbol;Acc:MGI:101780]	-	gene	Name match	0	0	0	-11.384	-12.7598	-15.6535	-15.4291	-12.711	-26.5387	-26.3348	-21.8684	-15.4102	-11.5156	-22.0251	-18.8932	-15.2416	-22.9856	-17.3087	-21.5215	-18.1723	-19.3177	-20.0428	-18.2055	-15.8661	-15.9193	-20.2206	-19.956	-13.5699	-13.1248	-14.5732	-16.5463	-15.273	-16.0228	-14.6872	-17.6815	-17.2857	-18.3871	-20.035	-19.9719
Cul3	1	80264923	80340480	-	Cul3	ENSMUSG00000004364	cullin 3 [Source:MGI Symbol;Acc:MGI:1347360]	-	gene	Name match	0	1.99906e-09	2.18467e-08	-5.18178	-11.4051	-6.17431	-18.1077	-13.2173	-11.6336	-26.5086	-15.7816	-20.9454	-17.6742	-17.3464	-19.067	-19.4742	-23.1594	-17.4825	-21.6952	-18.3461	-19.4915	-20.2166	-18.3793	-11.4956	-16.093	-20.3943	-20.1297	-13.7436	-13.2986	-9.30954	-16.7201	-15.4467	-16.1966	-19.1005	-17.8553	-17.4595	-18.5608	-14.8473	-20.1456
Gm37262	1	80326177	80327994	-	Gm37262	ENSMUSG00000103525	predicted gene, 37262 [Source:MGI Symbol;Acc:MGI:5610490]	-	gene	Name match	0	0.00337541	0.0150337	6.46581	-15.0747	-2.17052	-20.092	-7.84017	-21.3353	-21.1314	-16.665	-15.5683	-12.2971	-16.8217	-13.6898	-14.0971	-17.7823	-12.1053	-16.3181	-12.9689	-14.1143	-14.8394	-13.0021	-10.6627	-10.7159	-15.0172	-14.7526	-8.36649	-7.92141	-9.36978	-11.343	-10.0696	-10.8194	-13.7233	-12.4782	-12.0823	-13.1837	-14.8316	-14.7685
Dock10	1	80501073	80758527	-	Dock10	ENSMUSG00000038608	dedicator of cytokinesis 10 [Source:MGI Symbol;Acc:MGI:2146320]	-	gene	Name match	0	0.000424073	0.00220338	2.84945	-11.5034	-15.6216	-17.4766	-11.9595	-21.6709	-20.2735	-17.7762	-17.3142	-12.6044	-14.6582	-12.5856	-13.8814	-16.4098	-10.0935	-23.4639	-12.2078	-21.2602	-15.7672	-12.2212	-10.9151	-11.5599	-16.3671	-14.8275	-15.5123	-15.0672	-10.5562	-10.9792	-10.2179	-11.7472	-13.7398	-12.7441	-11.7274	-12.8199	-13.7486	-14.0344
Irs1	1	82233101	82291416	-	Irs1	ENSMUSG00000055980	insulin receptor substrate 1 [Source:MGI Symbol;Acc:MGI:99454]	-	gene	Name match	0	1.82234e-15	4.37055e-14	-5.67115	-10.4606	-14.4118	-25.0955	-13.0136	-26.3387	-26.1349	-16.9315	-20.5717	-17.3005	-21.8252	-18.6933	-19.1005	-22.7857	-11.7089	-21.3216	-17.9724	-14.2654	-19.8429	-13.7661	-15.6662	-15.7193	-20.0206	-19.756	-13.37	-12.9249	-14.3732	-16.3464	-15.073	-15.8229	-18.7268	-17.4816	-13.2333	-18.1871	-19.8351	-14.3345
Gm9747	1	82233112	82235933	+	Gm9747	ENSMUSG00000022591	predicted gene 9747 [Source:MGI Symbol;Acc:MGI:3710571]	+	gene	Name match	0	1.022e-14	2.20984e-13	-5.64809	-15.7091	-20.2308	-20.7264	-13.3814	-21.9696	-21.7658	-17.2994	-16.2026	-12.9314	-17.4561	-14.3242	-14.7314	-18.4166	-12.7397	-16.9524	-13.6033	-14.7487	-15.4738	-13.6365	-11.2971	-11.3502	-15.6515	-15.3869	-9.00085	-8.55578	-10.0041	-11.9773	-10.7039	-11.4538	-14.3577	-13.1125	-12.7167	-13.818	-15.466	-15.4028
Col4a3	1	82586921	82722059	+	Col4a3	ENSMUSG00000079465	collagen, type IV, alpha 3 [Source:MGI Symbol;Acc:MGI:104688]	+	gene	Name match	0	7.66695e-38	1.67408e-35	-11.1303	-11.9637	-20.451	-16.8476	-12.5256	-23.9398	-23.6104	-16.0996	-21.7842	-18.513	-23.0376	-13.1099	-14.2303	-23.9982	-13.9213	-22.534	-19.1849	-15.3203	-21.0554	-19.2181	-16.8787	-16.9318	-21.2331	-16.6466	-14.5824	-14.1374	-10.1858	-11.5995	-16.2855	-17.0354	-19.9393	-18.6941	-11.5024	-19.3996	-21.0475	-15.5845
C430014B12Rik	1	82691928	82725169	-	C430014B12Rik	ENSMUSG00000097564	RIKEN cDNA C430014B12 gene [Source:MGI Symbol;Acc:MGI:2444820]	-	gene	Name match	0	4.32274e-14	8.63359e-13	-5.96163	-12.6724	-23.7891	-14.8242	-16.9396	-11.7237	-21.587	-17.1206	-19.7608	-16.4897	-21.0143	-17.8824	-18.2897	-21.9748	-16.2979	-20.5107	-17.1615	-14.57	-19.032	-17.1947	-14.8553	-14.9085	-19.2097	-18.9452	-12.5591	-12.114	-13.5624	-15.5355	-14.2621	-15.012	-17.9159	-16.6707	-16.2749	-17.3763	-19.0242	-18.9611
Mff	1	82724890	82752394	+	Mff	ENSMUSG00000026150	mitochondrial fission factor [Source:MGI Symbol;Acc:MGI:1922984]	+	gene	Name match	0	2.87761e-07	2.35821e-06	-3.4244	-10.7813	-23.5157	-15.6256	-16.6663	-6.7337	-25.0507	-14.8777	-19.4875	-16.2164	-20.741	-17.6091	-18.0163	-21.7015	-16.0246	-20.2374	-16.8882	-18.0336	-18.7587	-10.9621	-14.582	-8.72826	-18.9364	-18.6718	-12.2858	-11.8407	-7.23016	-9.7179	-13.9888	-14.7387	-17.6426	-16.3974	-16.0016	-17.1029	-18.7509	-18.6877
Agfg1	1	82839483	82901182	+	Agfg1	ENSMUSG00000026159	ArfGAP with FG repeats 1 [Source:MGI Symbol;Acc:MGI:1333754]	+	gene	Name match	0	6.49615e-05	0.000380333	-4.19466	-11.4377	-20.137	-17.9374	-12.8725	-21.9462	-26.2162	-16.843	-20.6531	-12.908	-15.8003	-15.0377	-19.1819	-22.8671	-17.1902	-21.4029	-18.0538	-19.1992	-19.9243	-13.35	-15.7476	-15.8007	-20.102	-14.013	-13.4513	-13.0063	-14.4546	-12.9539	-15.1544	-15.9043	-18.8081	-17.563	-13.4302	-18.2685	-19.9164	-19.8533
Pid1	1	84036296	84364180	-	Pid1	ENSMUSG00000045658	phosphotyrosine interaction domain containing 1 [Source:MGI Symbol;Acc:MGI:2138391]	-	gene	Name match	0	0.000425226	0.00220873	-2.18637	-12.3366	-20.5816	-19.3209	-14.5662	-28.83	-28.6261	-17.0535	-17.741	-19.7918	-24.3164	-15.8231	-15.0304	-25.2769	-15.9886	-23.8128	-20.4636	-16.4126	-16.6275	-14.005	-18.1574	-10.8787	-22.5119	-22.2473	-15.8612	-15.4161	-13.3905	-18.8376	-17.5643	-18.3141	-15.4221	-19.9728	-14.4708	-20.6784	-22.3263	-22.2632
Trip12	1	84721189	84840516	-	Trip12	ENSMUSG00000026219	thyroid hormone receptor interactor 12 [Source:MGI Symbol;Acc:MGI:1309481]	-	gene	Name match	0	3.06161e-22	1.50713e-20	-7.42544	-11.0343	-16.5036	-15.224	-13.2739	-19.4449	-19.2345	-17.0259	-17.1308	-18.3335	-17.4967	-13.1649	-15.5221	-19.4968	-11.84	-16.4212	-14.6054	-13.849	-16.1389	-19.0386	-16.6992	-12.1409	-21.0536	-15.9366	-14.4029	-13.9579	-15.4062	-17.3794	-9.97671	-16.8559	-19.7597	-18.5146	-13.8793	-13.4831	-14.0578	-13.9114
Sp110	1	85576899	85598817	-	Sp110	ENSMUSG00000070034	Sp110 nuclear body protein [Source:MGI Symbol;Acc:MGI:1923364]	-	gene	Name match	0	0.000718701	0.00359866	-5.6995	-15.3445	-14.5524	-14.1698	-16.3388	-24.927	-24.7232	-20.2568	-19.16	-15.8888	-13.5066	-17.2816	-17.6888	-21.374	-15.6971	-19.9098	-16.5607	-17.7061	-18.4312	-16.5939	-14.2545	-14.3076	-18.6089	-18.3443	-11.9582	-11.5132	-12.9615	-14.9347	-13.6613	-14.4112	-17.3151	-16.0699	-15.6741	-16.7754	-18.4234	-12.5644
Sp100	1	85649988	85709998	+	Sp100	ENSMUSG00000026222	nuclear antigen Sp100 [Source:MGI Symbol;Acc:MGI:109561]	+	gene	Name match	0	2.12883e-21	9.72619e-20	-9.59518	-11.274	-16.4725	-17.1839	-12.733	-26.3801	-17.4392	-21.7098	-15.3318	-17.3419	-21.8665	-18.7346	-19.1419	-22.8271	-17.1501	-21.3629	-18.0137	-19.1592	-19.8842	-18.0469	-15.7075	-15.7607	-14.588	-19.7974	-13.4113	-12.9662	-14.4146	-16.3878	-15.1144	-15.8642	-18.7681	-17.523	-17.1271	-18.2285	-19.8764	-15.4133
9930111H07Rik	1	85775271	85784694	+	9930111H07Rik	ENSMUSG00000100217	RIKEN cDNA 9930111H07 gene [Source:MGI Symbol;Acc:MGI:1925012]	+	gene	Name match	0	0.00239951	0.0109334	6.71636	-17.4487	-2.80261	-22.466	-15.121	-23.7092	-23.5054	-19.039	-17.9422	-14.6711	-19.1957	-12.3269	-16.4711	-20.1562	-7.78814	-18.6921	-15.3429	-16.4883	-17.2134	-15.3761	-13.0367	-13.0899	-17.3912	-17.1266	-10.7405	-10.2954	-11.7438	-13.7169	-12.4435	-13.1934	-16.0973	-14.8521	-14.4563	-15.5577	-17.2056	-17.1425
Cab39	1	85793441	85851576	+	Cab39	ENSMUSG00000036707	calcium binding protein 39 [Source:MGI Symbol;Acc:MGI:107438]	+	gene	Name match	0	7.01806e-11	9.35781e-10	-7.43622	-10.5423	-17.4211	-15.8568	-9.01663	-26.3343	-26.1304	-15.654	-20.5673	-17.2961	-15.9683	-18.6888	-12.6403	-17.4198	-17.1043	-15.4646	-17.9679	-19.1134	-19.8384	-18.0011	-15.6617	-15.7149	-20.0162	-19.7516	-13.3655	-12.9204	-14.3688	-10.8324	-15.0686	-10.4185	-18.7223	-12.6247	-11.7594	-18.1827	-15.155	-19.7675
Psmd1	1	86064387	86139151	+	Psmd1	ENSMUSG00000026229	proteasome (prosome, macropain) 26S subunit, non-ATPase, 1 [Source:MGI Symbol;Acc:MGI:1917497]	+	gene	Name match	0	5.00058e-17	1.45762e-15	-7.97003	-12.1451	-17.275	-17.054	-14.4976	-23.0858	-17.4741	-15.7252	-17.3188	-11.3985	-15.6054	-13.5422	-12.8976	-16.5999	-11.2067	-15.4195	-13.2247	-13.5169	-15.0952	-12.2813	-9.94191	-12.4664	-14.8008	-20.1145	-10.117	-13.2834	-8.45043	-11.061	-8.03157	-11.5699	-13.2608	-10.8301	-11.2479	-11.3602	-13.4268	-14.3637
Gm21972	1	86133637	86162788	+	Gm21972	ENSMUSG00000094638	predicted gene 21972 [Source:MGI Symbol;Acc:MGI:5439441]	+	gene	Name match	0	5.36934e-05	0.000318195	-6.07012	-11.0494	-17.6663	-24.0952	-11.6913	-25.3384	-21.3976	-15.9312	-19.5714	-10.5633	-15.181	-17.693	-18.1003	-21.7854	-12.256	-15.2624	-12.9132	-13.2651	-18.8426	-17.0053	-14.6659	-9.56704	-13.6204	-18.7557	-12.3697	-11.9246	-9.89902	-9.94619	-14.0727	-14.8226	-12.8196	-16.4813	-16.0855	-11.3624	-12.8248	-13.0049
Ncl	1	86344719	86359400	-	Ncl	ENSMUSG00000026234	nucleolin [Source:MGI Symbol;Acc:MGI:97286]	-	gene	Name match	0	3.22695e-11	4.52167e-10	-3.93679	-9.88105	-12.8997	-12.1821	-15.7607	-24.3489	-24.145	-14.4392	-18.5819	-15.3107	-19.8353	-16.7035	-17.1107	-11.9609	-15.1189	-15.2728	-15.9825	-17.128	-17.8531	-16.0158	-13.6763	-13.7295	-18.0308	-13.7073	-11.3801	-10.935	-12.3834	-14.3566	-4.0516	-13.833	-16.7369	-15.4918	-9.77401	-16.1973	-17.8452	-17.7821
Ptma	1	86526726	86530712	+	Ptma	ENSMUSG00000026238	prothymosin alpha [Source:MGI Symbol;Acc:MGI:97803]	+	gene	Name match	0	4.74175e-21	2.11219e-19	-4.97389	-9.50107	-20.7294	-16.751	-2.73224	-22.4682	-22.2644	-17.7979	-16.7012	-7.49667	-17.9546	-14.8228	-15.23	-18.9152	-13.2383	-17.451	-14.1019	-15.2473	-15.9724	-14.1351	-11.7957	-11.8488	-16.1501	-15.8855	-9.49944	-9.05437	-10.5027	-12.4759	-11.2025	-11.9524	-14.8563	-13.6111	-13.2153	-14.3166	-15.9646	-15.9014
Pde6d	1	86542994	86582629	-	Pde6d	ENSMUSG00000026239	phosphodiesterase 6D, cGMP-specific, rod, delta [Source:MGI Symbol;Acc:MGI:1270843]	-	gene	Name match	0	3.8037e-06	2.67281e-05	-6.66208	-11.8693	-15.6669	-16.0332	-17.1934	-25.7816	-25.5778	-21.1114	-20.0146	-16.7435	-21.2681	-13.1262	-11.65	-14.4917	-16.5517	-20.7645	-17.4153	-18.5607	-19.2858	-17.4485	-9.34239	-15.1623	-19.4636	-19.199	-12.8129	-12.3678	-9.66417	-15.7893	-14.5159	-15.2658	-18.1697	-16.9245	-16.5287	-17.6301	-19.278	-19.2149
Eif4e2	1	87213914	87240488	+	Eif4e2	ENSMUSG00000026254	eukaryotic translation initiation factor 4E member 2 [Source:MGI Symbol;Acc:MGI:1914440]	+	gene	Name match	0	5.9703e-10	6.98747e-09	-7.08474	-12.0781	-17.9566	-19.6397	-16.6167	-25.2049	-25.001	-14.4519	-19.4379	-16.1667	-20.6913	-17.5595	-17.9667	-21.6519	-15.975	-20.1877	-16.8386	-17.984	-18.7091	-16.8718	-14.5324	-14.5855	-18.8868	-18.6222	-12.2361	-11.7911	-13.2394	-15.2126	-13.9392	-14.6891	-17.5929	-16.3478	-11.8	-17.0533	-18.7012	-18.6381
Efhd1	1	87264363	87310839	+	Efhd1	ENSMUSG00000026255	EF hand domain containing 1 [Source:MGI Symbol;Acc:MGI:1921607]	+	gene	Name match	0	2.04563e-09	2.23194e-08	-7.48103	-10.095	-19.5356	-24.7681	-12.3643	-26.0114	-25.8075	-16.8672	-13.1975	-16.9732	-21.4978	-13.4066	-18.7732	-22.4583	-11.17	-20.9942	-17.645	-18.7904	-19.5155	-17.6782	-11.0169	-15.392	-19.6933	-14.3225	-13.0426	-12.5975	-14.0459	-16.019	-14.7457	-15.4955	-14.547	-17.1542	-16.7584	-17.8598	-19.5077	-13.769
Gigyf2	1	87326998	87450796	+	Gigyf2	ENSMUSG00000048000	GRB10 interacting GYF protein 2 [Source:MGI Symbol;Acc:MGI:2138584]	+	gene	Name match	0	2.37246e-09	2.57199e-08	-7.11625	-11.1699	-20.1077	-17.7487	-13.3626	-27.4248	-21.747	-16.4527	-21.6578	-13.7751	-16.6931	-14.4179	-20.1866	-18.8618	-18.1948	-22.4076	-15.0991	-20.2039	-20.9289	-19.0916	-12.6933	-12.4054	-21.1067	-20.8421	-14.456	-14.0109	-11.6068	-17.4325	-11.0529	-16.9089	-19.8128	-13.8921	-12.6979	-19.2732	-20.9211	-15.4206
Inpp5d	1	87620312	87720507	+	Inpp5d	ENSMUSG00000026288	inositol polyphosphate-5-phosphatase D [Source:MGI Symbol;Acc:MGI:107357]	+	gene	Name match	0	0.00785537	0.0330596	5.93392	-11.5907	-15.4054	-8.01829	-18.5314	-27.1196	-26.9157	-22.4493	-21.3526	-18.0814	-16.5471	-12.9128	-19.8814	-23.5666	-17.8896	-22.1024	-12.7939	-19.8987	-20.6238	-18.7865	-11.7715	-16.5002	-20.8015	-20.5369	-14.1508	-13.7057	-15.1541	-17.1273	-15.8539	-16.6038	-19.5076	-18.2625	-12.9598	-18.968	-20.6159	-14.251
Atg16l1	1	87755870	87792428	+	Atg16l1	ENSMUSG00000026289	autophagy related 16-like 1 (S. cerevisiae) [Source:MGI Symbol;Acc:MGI:1924290]	+	gene	Name match	0	0.00220786	0.0101315	-2.61286	-12.1757	-14.195	-14.8753	-12.281	-25.6651	-25.4612	-20.9948	-19.8981	-16.6269	-21.1515	-18.0196	-18.4269	-22.1121	-16.4351	-20.6479	-11.2398	-18.4442	-19.1692	-17.3319	-14.9925	-15.0457	-19.347	-19.0824	-12.6963	-12.2512	-13.6996	-15.6728	-14.3994	-15.1492	-18.0531	-16.808	-16.4121	-17.5135	-19.1614	-14.9463
Gm38365	1	87897540	87900532	+	Gm38365	ENSMUSG00000103591	predicted gene, 38365 [Source:MGI Symbol;Acc:MGI:5611593]	+	gene	Name match	0	0.00108142	0.00525213	-5.54136	-9.39402	-20.3157	-20.8112	-13.4663	-22.0545	-21.8506	-17.3842	-16.2875	-13.0163	-17.5409	-14.4091	-14.8163	-18.5015	-12.8246	-17.0373	-13.6882	-14.8336	-15.5587	-13.7214	-11.382	-6.63926	-15.7364	-15.4718	-9.08573	-8.64065	-10.089	-12.0622	-10.7888	-11.5387	-14.4425	-13.1974	-12.8016	-13.9029	-15.5508	-15.4877
Usp40	1	87945119	88008551	-	Usp40	ENSMUSG00000005501	ubiquitin specific peptidase 40 [Source:MGI Symbol;Acc:MGI:2443184]	-	gene	Name match	0	3.68093e-06	2.59063e-05	-6.5781	-11.8626	-15.7749	-16.836	-17.8719	-26.4601	-26.2562	-16.3159	-20.6931	-17.4219	-21.9465	-18.8146	-19.2219	-22.9071	-17.2301	-21.4429	-18.0937	-19.2392	-19.9642	-18.1269	-15.7875	-15.8407	-20.142	-19.8774	-13.4913	-13.0462	-14.4946	-16.4678	-9.4574	-15.9442	-18.8481	-17.603	-17.2071	-18.3085	-19.9564	-19.8933
Ugt1a10	1	88055388	88219004	+	Ugt1a10	ENSMUSG00000090165	UDP glycosyltransferase 1 family, polypeptide A10 [Source:MGI Symbol;Acc:MGI:3580642]	+	gene	Name match	0	0.00735466	0.0310768	-4.16906	-12.9307	-17.6884	-21.1099	-14.6275	-27.8271	-24.1493	-16.5786	-22.0601	-14.1775	-23.3135	-20.1817	-12.2033	-24.2741	-18.5971	-14.3679	-13.6083	-20.6062	-21.3313	-19.494	-17.1545	-17.2077	-21.509	-21.2444	-14.8583	-14.4132	-15.8616	-17.8348	-11.0171	-17.3113	-20.2151	-18.97	-18.5741	-19.6755	-21.3234	-21.2603
Ugt1a9	1	88070800	88218997	+	Ugt1a9	ENSMUSG00000090175	UDP glucuronosyltransferase 1 family, polypeptide A9 [Source:MGI Symbol;Acc:MGI:3576092]	+	gene	Name match	0	0.00735261	0.031072	-4.16906	-13.5303	-17.5456	-20.9671	-14.4847	-27.6843	-24.0065	-16.4358	-21.9173	-14.0347	-23.1707	-20.0389	-12.0605	-24.1313	-18.4543	-14.2251	-13.4655	-20.4634	-21.1885	-19.3512	-17.0117	-17.0649	-21.3662	-21.1016	-14.7155	-14.2704	-15.7188	-17.692	-10.8743	-17.1685	-20.0723	-18.8272	-18.4313	-19.5327	-21.1806	-21.1175
Ugt1a8	1	88087813	88219004	+	Ugt1a8	ENSMUSG00000089675	UDP glucuronosyltransferase 1 family, polypeptide A8 [Source:MGI Symbol;Acc:MGI:3576090]	+	gene	Name match	0	0.00735256	0.031072	-4.16906	-13.3544	-17.3697	-20.7912	-14.3088	-27.5084	-23.8307	-16.2599	-21.7414	-13.8588	-22.9949	-19.863	-11.8846	-23.9554	-18.2785	-14.0492	-13.2897	-20.2875	-21.0126	-19.1753	-16.8359	-16.8891	-21.1904	-20.9258	-14.5397	-14.0946	-15.543	-17.5161	-10.6984	-16.9926	-19.8965	-18.6513	-18.2555	-19.3569	-21.0048	-20.9417
Ugt1a7c	1	88095062	88220002	+	Ugt1a7c	ENSMUSG00000090124	UDP glucuronosyltransferase 1 family, polypeptide A7C [Source:MGI Symbol;Acc:MGI:3032636]	+	gene	Name match	0	0.00735264	0.031072	-4.16906	-13.1126	-17.2993	-20.7208	-14.2384	-27.438	-23.7602	-16.1895	-21.671	-13.7884	-22.9244	-19.7926	-11.8142	-23.885	-18.2081	-13.9788	-13.2192	-20.2171	-20.9422	-19.1049	-16.7655	-16.8186	-21.1199	-20.8553	-14.4692	-14.0242	-15.4725	-17.4457	-10.628	-16.9222	-19.8261	-18.5809	-18.1851	-19.2864	-20.9343	-20.8712
Ugt1a6b	1	88103252	88219003	+	Ugt1a6b	ENSMUSG00000090145	UDP glucuronosyltransferase 1 family, polypeptide A6B [Source:MGI Symbol;Acc:MGI:3580629]	+	gene	Name match	0	0.00735015	0.031072	-4.16906	-13.1738	-17.1891	-20.6106	-14.1282	-27.3278	-23.65	-16.0793	-21.5608	-13.6782	-22.8142	-19.6824	-11.704	-23.7748	-18.0979	-13.8686	-13.109	-20.1069	-20.832	-18.9947	-16.6553	-16.7084	-21.0097	-20.7451	-14.359	-13.914	-15.3623	-17.3355	-10.5178	-16.812	-19.7158	-18.4707	-18.0749	-19.1762	-20.8241	-20.761
Ugt1a6a	1	88134809	88218997	+	Ugt1a6a	ENSMUSG00000054545	UDP glucuronosyltransferase 1 family, polypeptide A6A [Source:MGI Symbol;Acc:MGI:2137698]	+	gene	Name match	0	0.00734797	0.0310707	-4.16906	-13.5979	-16.7297	-20.1513	-13.6688	-26.8685	-23.1907	-15.6199	-21.1015	-17.8303	-22.3549	-19.223	-19.6303	-23.3155	-17.6385	-13.4093	-12.6497	-19.6476	-20.3726	-18.5353	-16.1959	-16.2491	-20.5504	-20.2858	-13.8997	-13.4546	-14.903	-16.8762	-10.0584	-16.3526	-19.2565	-18.0114	-17.6155	-18.7169	-20.3648	-20.3017
Ugt1a5	1	88166012	88218997	+	Ugt1a5	ENSMUSG00000089943	UDP glucuronosyltransferase 1 family, polypeptide A5 [Source:MGI Symbol;Acc:MGI:3032634]	+	gene	Name match	0	0.00734766	0.0310707	-4.16906	-13.2643	-16.0617	-19.4832	-13.0008	-26.2004	-22.5227	-14.9519	-20.4334	-17.1623	-21.6869	-18.555	-18.9623	-22.6474	-16.9705	-12.7412	-11.9817	-18.9795	-19.7046	-17.8673	-15.5279	-15.5811	-19.8824	-19.6178	-13.2317	-12.7866	-14.235	-16.2081	-9.39043	-15.6846	-18.5885	-17.3433	-16.9475	-18.0489	-19.6968	-19.6337
Ugt1a2	1	88200601	88218997	+	Ugt1a2	ENSMUSG00000090171	UDP glucuronosyltransferase 1 family, polypeptide A2 [Source:MGI Symbol;Acc:MGI:3576049]	+	gene	Name match	0	0.00734566	0.0310683	-4.16906	-12.2845	-14.5356	-23.431	-16.0861	-24.6743	-20.9965	-13.4258	-18.9073	-15.6361	-20.1607	-17.0289	-17.4361	-21.1213	-15.4444	-11.2151	-16.308	-17.4534	-18.1785	-16.3412	-14.0018	-14.0549	-18.3562	-18.0916	-11.7055	-11.2605	-12.7088	-14.682	-13.4086	-14.1585	-17.0623	-15.8172	-15.4214	-16.5227	-18.1706	-18.1075
Ugt1a1	1	88211959	88218997	+	Ugt1a1	ENSMUSG00000089960	UDP glucuronosyltransferase 1 family, polypeptide A1 [Source:MGI Symbol;Acc:MGI:98898]	+	gene	Name match	0	0.00734504	0.0310683	-4.16906	-17.0277	-21.5495	-22.045	-14.7001	-23.2883	-23.0844	-18.618	-17.5213	-14.2501	-18.7747	-15.6428	-16.0501	-19.7353	-14.0583	-9.82908	-14.9219	-16.0674	-16.7924	-14.9552	-12.6157	-12.6689	-16.9702	-16.7056	-10.3195	-9.87443	-11.3228	-13.296	-12.0226	-12.7724	-15.6763	-14.4312	-14.0353	-15.1367	-16.7846	-16.7215
Hjurp	1	88262471	88277633	-	Hjurp	ENSMUSG00000044783	Holliday junction recognition protein [Source:MGI Symbol;Acc:MGI:2685821]	-	gene	Name match	0	8.3382e-13	1.42607e-11	-8.87323	-18.1348	-22.6566	-23.1521	-15.8072	-24.3954	-24.1915	-19.7251	-18.6284	-15.3572	-19.8818	-16.75	-17.1572	-20.8424	-15.1654	-19.3782	-16.029	-17.1745	-17.8996	-16.0623	-13.7228	-13.776	-18.0773	-17.8127	-11.4266	-10.9815	-12.4299	-14.4031	-13.1297	-13.8796	-16.7834	-15.5383	-15.1424	-16.2438	-17.8917	-17.8286
Agap1	1	89454806	89897617	+	Agap1	ENSMUSG00000055013	ArfGAP with GTPase domain, ankyrin repeat and PH domain 1 [Source:MGI Symbol;Acc:MGI:2653690]	+	gene	Name match	0	6.8414e-08	6.12867e-07	-4.29879	-11.7916	-16.7737	-17.5782	-13.4358	-29.2635	-21.0747	-18.3751	-18.5371	-14.3728	-17.8165	-16.0066	-17.5513	-16.3344	-13.0111	-19.6348	-20.8971	-17.1901	-22.7676	-16.3189	-18.5909	-11.8339	-22.9454	-16.7214	-16.2947	-15.8496	-17.298	-19.2712	-17.9978	-13.1038	-21.6515	-15.9324	-14.1581	-21.1119	-17.9074	-22.6967
Ackr3	1	90203980	90216751	+	Ackr3	ENSMUSG00000044337	atypical chemokine receptor 3 [Source:MGI Symbol;Acc:MGI:109562]	+	gene	Name match	0	9.42894e-27	7.39175e-25	-6.18721	-11.8045	-22.409	-13.4351	-15.5596	-24.1478	-23.944	-19.4776	-18.3808	-15.1096	-19.6343	-8.10246	-12.4357	-20.5948	-14.9179	-19.1306	-15.7815	-16.9269	-17.652	-15.8147	-13.4753	-13.5284	-17.8297	-17.5651	-11.179	-10.734	-12.1823	-14.1555	-12.8821	-13.632	-16.5359	-15.2907	-14.8949	-15.9962	-17.6442	-17.581
Cops8	1	90602981	90613341	+	Cops8	ENSMUSG00000034432	COP9 signalosome subunit 8 [Source:MGI Symbol;Acc:MGI:1915363]	+	gene	Name match	0	3.10402e-12	4.97189e-11	-4.49981	-11.2837	-13.7216	-22.6027	-15.2578	-5.47785	-23.6421	-16.0237	-18.079	-14.8078	-19.3324	-7.81016	-16.6078	-20.293	-14.6161	-18.8288	-15.4797	-16.6251	-17.3502	-15.5129	-13.1735	-13.2266	-17.5279	-17.2633	-10.8772	-10.4322	-11.8805	-13.8537	-12.5803	-13.3302	-16.234	-6.10557	-14.5931	-15.6944	-17.3423	-17.2792
Col6a3	1	90765923	90843971	-	Col6a3	ENSMUSG00000048126	collagen, type VI, alpha 3 [Source:MGI Symbol;Acc:MGI:88461]	-	gene	Name match	0	1.50733e-18	5.25956e-17	-5.40205	-12.202	-18.5646	-15.4828	-11.5433	-21.9634	-26.5554	-22.0889	-16.0329	-11.2115	-22.2456	-19.1138	-19.521	-17.1716	-13.4704	-21.742	-18.3929	-19.5383	-20.2634	-18.4261	-16.0867	-16.1398	-20.4411	-15.2172	-13.7904	-13.3454	-14.7937	-16.7669	-15.4935	-16.2434	-12.5859	-17.9021	-17.5063	-18.6076	-20.2556	-14.7925
Gm26683	1	91297203	91304405	-	Gm26683	ENSMUSG00000097285	predicted gene, 26683 [Source:MGI Symbol;Acc:MGI:5477177]	-	gene	Name match	0	0.00437148	0.0191254	4.29512	-12.3854	-21.5827	-22.0782	-14.7333	-23.3215	-23.1176	-18.6512	-17.5545	-14.2833	-18.8079	-15.6761	-16.0833	-19.7685	-9.76964	-18.3043	-14.9552	-16.1006	-16.8257	-14.9884	-7.32703	-12.7021	-17.0034	-16.7388	-10.3527	-9.90766	-11.356	-13.3292	-12.0558	-12.8057	-15.7095	-14.4644	-14.0686	-15.1699	-16.8178	-16.7547
Per2	1	91415982	91459324	-	Per2	ENSMUSG00000055866	period circadian clock 2 [Source:MGI Symbol;Acc:MGI:1195265]	-	gene	Name match	0	8.5363e-07	6.48901e-06	-6.4413	-11.5497	-18.8906	-24.6674	-17.3224	-20.8517	-25.7068	-21.2404	-20.1436	-16.8725	-21.3971	-18.2652	-18.6725	-22.3576	-11.2808	-20.8935	-17.5443	-18.6897	-19.4148	-12.3811	-15.2381	-9.18505	-19.5925	-19.3279	-12.9419	-12.4968	-13.9452	-15.9183	-14.6449	-15.3948	-18.2987	-12.0942	-16.6577	-17.7591	-19.407	-19.3438
Asb1	1	91540544	91559589	+	Asb1	ENSMUSG00000026311	ankyrin repeat and SOCS box-containing 1 [Source:MGI Symbol;Acc:MGI:1929735]	+	gene	Name match	0	2.09015e-06	1.5117e-05	-7.56608	-11.5436	-22.9855	-19.2416	-10.1512	-24.7243	-24.5205	-20.0541	-18.9573	-15.6861	-20.2108	-17.0789	-17.4861	-21.1713	-15.4944	-14.7478	-16.358	-17.5034	-18.2285	-16.3912	-14.0518	-14.1049	-18.4062	-18.1416	-11.7556	-11.3105	-12.7588	-14.732	-13.4586	-14.2085	-17.1124	-15.8672	-9.89311	-16.5727	-18.2207	-18.1575
Hdac4	1	91928779	92195699	-	Hdac4	ENSMUSG00000026313	histone deacetylase 4 [Source:MGI Symbol;Acc:MGI:3036234]	-	gene	Name match	0	7.22281e-12	1.0967e-10	-4.54591	-11.9645	-13.7977	-16.825	-14.471	-24.6807	-22.3193	-15.0707	-22.7662	-19.495	-18.4413	-14.5069	-21.295	-19.1277	-15.0638	-23.516	-16.4299	-21.3123	-22.0373	-15.1901	-17.8606	-17.9138	-22.2151	-16.9911	-15.5644	-15.1193	-16.5677	-18.5409	-10.9455	-12.9111	-20.9212	-19.6761	-19.2802	-15.3716	-22.0295	-17.1139
Ndufa10	1	92439010	92473860	-	Ndufa10	ENSMUSG00000026260	NADH:ubiquinone oxidoreductase subunit A10 [Source:MGI Symbol;Acc:MGI:1914523]	-	gene	Name match	0	2.84297e-05	0.000174878	-2.67683	-12.6443	-23.8572	-17.1347	-17.0078	-7.39283	-25.3922	-20.9258	-19.829	-16.5579	-21.0825	-17.9506	-18.3579	-22.043	-16.3661	-20.5789	-17.2297	-18.3751	-19.1002	-17.2629	-14.9235	-14.9767	-19.2779	-19.0133	-12.6273	-12.1822	-8.72367	-15.6037	-14.3303	-15.0802	-17.9841	-16.7389	-16.3431	-17.4445	-19.0924	-19.0292
Cops9	1	92637145	92641985	-	Cops9	ENSMUSG00000073616	COP9 signalosome subunit 9 [Source:MGI Symbol;Acc:MGI:1914165]	-	gene	Name match	0	1.78172e-12	2.93308e-11	-3.68218	-16.4877	-21.0094	-21.5049	-14.16	-5.35817	-22.5444	-18.0779	-16.9812	-13.71	-18.2346	-15.1028	-15.51	-19.1952	-13.5183	-17.731	-14.3819	-15.5273	-16.2524	-14.4151	-12.0757	-12.1288	-16.4301	-16.1655	-9.77944	-9.33437	-10.7827	-12.7559	-11.4825	-12.2324	-15.1363	-13.8911	-13.4953	-14.5966	-16.2446	-16.1814
Gpc1	1	92831645	92860779	+	Gpc1	ENSMUSG00000034220	glypican 1 [Source:MGI Symbol;Acc:MGI:1194891]	+	gene	Name match	0	2.00707e-05	0.000126387	-7.0842	-13.2526	-23.5988	-24.0943	-13.0124	-19.8637	-25.1337	-20.6673	-19.5706	-16.2994	-20.824	-17.6922	-14.1401	-21.7846	-16.1076	-16.0809	-16.9712	-18.1167	-18.8418	-17.0045	-14.665	-14.7182	-19.0195	-18.7549	-12.3688	-11.9237	-13.3721	-15.3453	-14.0719	-14.8218	-17.7256	-16.4805	-11.6107	-17.186	-14.775	-18.7708
Ankmy1	1	92859803	92902906	-	Ankmy1	ENSMUSG00000034212	ankyrin repeat and MYND domain containing 1 [Source:MGI Symbol;Acc:MGI:3045261]	-	gene	Name match	0	2.00665e-05	0.000126382	-7.0842	-11.5832	-24.1639	-24.6594	-9.79613	-21.5807	-25.6988	-16.3799	-20.1357	-11.625	-21.3891	-18.2572	-14.7051	-15.6899	-10.59	-20.8855	-17.5363	-18.6817	-19.4068	-11.9581	-15.2301	-15.2833	-14.1106	-19.32	-12.9339	-12.4888	-13.9372	-15.9103	-14.637	-15.3868	-18.2907	-17.0456	-9.69036	-17.7511	-19.399	-19.3359
Dusp28	1	92906981	92908435	+	Dusp28	ENSMUSG00000047067	dual specificity phosphatase 28 [Source:MGI Symbol;Acc:MGI:1914696]	+	gene	Name match	0	0.00122119	0.00585919	-7.01716	-14.7534	-19.2751	-19.7707	-12.4257	-21.0139	-20.8101	-16.3437	-15.2469	-11.9757	-16.5004	-13.3685	-13.7757	-17.4609	-11.784	-15.9968	-12.6476	-13.793	-14.5181	-12.6808	-10.3414	-10.3945	-14.6958	-14.4312	-8.04515	-7.60008	-9.04845	-11.0216	-9.74823	-10.4981	-13.402	-12.1568	-11.761	-12.8623	-14.5103	-14.4471
Rnpepl1	1	92910783	92924384	+	Rnpepl1	ENSMUSG00000026269	arginyl aminopeptidase (aminopeptidase B)- like 1 [Source:MGI Symbol;Acc:MGI:1914170]	+	gene	Name match	0	5.80255e-06	3.9738e-05	-5.15083	-10.4686	-22.4999	-22.9954	-15.6505	-24.2387	-24.0348	-15.0241	-18.4717	-10.5249	-19.7251	-16.5932	-17.0005	-20.6856	-10.9498	-19.2215	-15.8723	-11.251	-17.7428	-15.9055	-8.95467	-13.6193	-17.9206	-17.656	-11.2699	-10.8248	-12.2732	-14.2463	-12.973	-13.7228	-16.6267	-15.3815	-14.9857	-16.0871	-17.735	-17.6719
Mterf4	1	93299211	93305915	-	Mterf4	ENSMUSG00000026273	mitochondrial transcription termination factor 4 [Source:MGI Symbol;Acc:MGI:1918355]	-	gene	Name match	0	1.14971e-09	1.29328e-08	-8.07733	-11.3462	-12.1009	-21.9749	-9.19254	-23.2181	-23.0143	-18.5479	-17.4511	-14.18	-18.7046	-11.0988	-15.98	-19.6651	-13.9882	-18.201	-14.8518	-15.9972	-16.7223	-14.885	-12.5456	-12.5988	-16.9001	-16.6355	-10.2494	-9.8043	-11.2527	-13.2258	-11.9524	-12.7023	-15.6062	-14.361	-13.9652	-15.0666	-16.7145	-16.6514
Ppp1r7	1	93342854	93373489	+	Ppp1r7	ENSMUSG00000026275	protein phosphatase 1, regulatory subunit 7 [Source:MGI Symbol;Acc:MGI:1913635]	+	gene	Name match	0	5.1194e-10	6.02727e-09	-4.21443	-12.5057	-23.6713	-18.6225	-12.1463	-21.9361	-25.2062	-14.7549	-19.6431	-16.3719	-15.2851	-11.9979	-18.1719	-21.8571	-16.1801	-20.3929	-17.0437	-18.1892	-18.9142	-17.0769	-14.7375	-14.7907	-19.092	-18.8274	-12.4413	-11.9962	-13.4446	-15.4178	-14.1444	-9.61294	-12.0022	-11.3566	-10.9607	-17.2585	-13.295	-18.8433
Hdlbp	1	93405940	93478815	-	Hdlbp	ENSMUSG00000034088	high density lipoprotein (HDL) binding protein [Source:MGI Symbol;Acc:MGI:99256]	-	gene	Name match	0	5.09806e-18	1.66923e-16	-5.06391	-11.3929	-16.0865	-13.9086	-12.6721	-8.78006	-19.4715	-16.6286	-16.2818	-10.8702	-15.7468	-12.108	-13.0803	-17.6333	-17.4303	-17.7907	-18.2939	-19.4394	-20.1645	-18.3272	-9.00284	-16.0409	-14.8683	-20.0776	-13.6915	-8.7725	-9.84236	-16.668	-15.3946	-9.6174	-13.8519	-9.1795	-10.6406	-18.5087	-14.4197	-14.0107
2002-09-01	1	93478964	93510260	+	2002-09-01	ENSMUSG00000026276	septin 2 [Source:MGI Symbol;Acc:MGI:97298]	+	gene	Name match	0	0	0	-11.9731	-12.3701	-14.6859	-16.2318	-16.8527	-16.434	-25.237	-20.7706	-19.6739	-16.4027	-16.1903	-13.556	-18.2027	-21.8879	-16.2109	-16.0238	-17.0745	-18.2199	-18.945	-17.1077	-14.7683	-14.8215	-19.1228	-18.8582	-12.4721	-12.027	-13.4754	-15.4486	-14.1752	-14.925	-17.8289	-16.5838	-16.1879	-17.2893	-18.9372	-18.8741
2002-09-01	1	93478993	93509733	+	2002-09-01	ENSMUSG00000026276	septin 2 [Source:MGI Symbol;Acc:MGI:97298]	+	gene	Name match	0	0	0	-12.0707	-12.3442	-14.66	-16.2059	-16.8268	-16.4081	-25.2111	-20.7447	-19.648	-16.3768	-16.1645	-13.5301	-18.1768	-21.862	-16.1851	-15.9979	-17.0487	-18.1941	-18.9192	-17.0819	-14.7425	-14.7956	-19.0969	-18.8323	-12.4462	-12.0012	-13.4495	-15.4227	-14.1493	-14.8992	-17.803	-16.5579	-16.1621	-17.2634	-18.9113	-18.8482
Stk25	1	93619751	93658659	-	Stk25	ENSMUSG00000026277	serine/threonine kinase 25 (yeast) [Source:MGI Symbol;Acc:MGI:1891699]	-	gene	Name match	0	1.22211e-06	9.11293e-06	-3.35018	-11.9245	-17.4548	-16.8361	-17.1667	-25.7549	-25.5511	-21.0847	-15.929	-16.7168	-21.2414	-18.1095	-14.3648	-17.0957	-16.525	-20.7378	-17.3886	-18.534	-19.2591	-17.4218	-15.0824	-15.1356	-19.4368	-19.1722	-12.7862	-12.3411	-13.7895	-15.7626	-14.4892	-15.2391	-18.143	-16.8978	-16.502	-17.6034	-19.2513	-19.1881
Bok	1	93685660	93695764	+	Bok	ENSMUSG00000026278	BCL2-related ovarian killer [Source:MGI Symbol;Acc:MGI:1858494]	+	gene	Name match	0	3.77852e-12	5.95577e-11	-5.31456	-11.616	-22.0711	-22.5666	-15.2217	-18.3725	-23.606	-19.1396	-18.0429	-14.7717	-19.2963	-16.1645	-16.5717	-20.2569	-14.58	-14.3928	-15.4436	-16.589	-17.3141	-15.4768	-13.1374	-13.1905	-17.4918	-17.2272	-10.8411	-10.3961	-11.8444	-13.8176	-12.5442	-13.2941	-16.1979	-14.9528	-14.557	-15.6583	-17.3062	-17.2431
Dtymk	1	93792576	93801934	-	Dtymk	ENSMUSG00000026281	deoxythymidylate kinase [Source:MGI Symbol;Acc:MGI:108396]	-	gene	Name match	0	1.34978e-07	1.15676e-06	-3.19884	-11.0013	-21.9605	-22.456	-15.1111	-23.6993	-23.4954	-19.029	-17.9323	-14.6611	-19.1857	-16.0538	-16.4611	-20.1463	-14.4693	-15.3602	-15.3329	-16.4784	-17.2034	-15.3661	-13.0267	-13.0799	-17.3812	-17.1166	-10.7305	-10.2854	-11.7338	-13.707	-12.4336	-13.1834	-16.0873	-14.8422	-14.4463	-15.5477	-17.1956	-17.1325
Ing5	1	93803965	93822101	+	Ing5	ENSMUSG00000026283	inhibitor of growth family, member 5 [Source:MGI Symbol;Acc:MGI:1922816]	+	gene	Name match	0	1.9075e-05	0.000120608	-6.63515	-11.23	-22.915	-23.4105	-11.6656	-24.6538	-24.4499	-19.9835	-18.8868	-11.2937	-20.1402	-17.0083	-17.4156	-21.1008	-15.4238	-16.0252	-16.2874	-17.4329	-18.1579	-16.3207	-13.9812	-14.0344	-18.3357	-18.0711	-11.685	-11.2399	-12.6883	-14.6615	-13.3881	-14.1379	-17.0418	-15.7967	-15.4008	-16.5022	-18.1501	-18.087
Gm28901	1	97024516	97025565	-	Gm28901	ENSMUSG00000100454	predicted gene 28901 [Source:MGI Symbol;Acc:MGI:5579607]	-	gene	Name match	0	6.30521e-07	4.87209e-06	-5.89337	-14.2828	-18.8045	-19.3	-11.9551	-20.5433	-20.3394	-15.873	-14.7763	-11.5051	-16.0297	-12.8979	-13.3051	-16.9903	-11.3134	-15.5261	-12.177	-13.3224	-14.0475	-12.2102	-9.87075	-9.92391	-14.2252	-13.9606	-7.57452	-7.12945	-8.57782	-10.551	-9.2776	-10.0275	-12.9313	-11.6862	-11.2904	-12.3917	-14.0396	-13.9765
Gin1	1	97770172	97793709	+	Gin1	ENSMUSG00000026333	gypsy retrotransposon integrase 1 [Source:MGI Symbol;Acc:MGI:2182036]	+	gene	Name match	0	0.00137257	0.00651871	-1.89571	-12.2422	-23.291	-23.7866	-16.4416	-18.9952	-24.826	-15.2076	-15.1108	-15.9916	-15.9048	-17.3844	-17.7916	-21.4768	-15.7999	-20.0127	-16.6635	-17.8089	-18.534	-16.6967	-14.3573	-14.4104	-18.7117	-18.4471	-12.0611	-11.616	-13.0643	-15.0375	-13.7641	-14.514	-17.4179	-16.1727	-11.1655	-16.8782	-18.5262	-18.463
Pam	1	97795114	98095646	-	Pam	ENSMUSG00000026335	peptidylglycine alpha-amidating monooxygenase [Source:MGI Symbol;Acc:MGI:97475]	-	gene	Name match	0	3.96391e-19	1.46652e-17	-4.62726	-12.5369	-10.163	-9.44586	-15.9641	-13.0035	-23.304	-18.1271	-18.5374	-19.6661	-9.16686	-15.8194	-15.7291	-25.1513	-13.1129	-23.6871	-14.0362	-17.7464	-16.0792	-12.3488	-11.1518	-18.0849	-22.3862	-22.1216	-15.7355	-15.2904	-16.7388	-18.712	-17.4386	-14.2291	-15.5141	-14.4857	-19.4513	-14.0084	-17.3482	-16.1275
Relch	1	105663861	105755191	+	Relch	ENSMUSG00000026319	RAB11 binding and LisH domain, coiled-coil and HEAT repeat containing [Source:MGI Symbol;Acc:MGI:1922832]	+	gene	Name match	0	7.31792e-08	6.52762e-07	-7.50333	-11.4912	-8.45358	-8.25495	-10.5733	-26.9859	-26.7821	-16.3563	-21.2189	-17.9478	-16.8941	-19.3405	-13.8144	-23.4329	-12.3186	-16.7724	-18.6196	-12.7182	-13.5052	-18.6528	-16.3134	-16.3666	-20.6678	-20.4032	-14.0172	-13.5721	-15.0205	-16.9936	-15.7202	-16.4701	-19.374	-18.1288	-12.2956	-14.0385	-20.4823	-14.5667
Bcl2	1	106538178	106714274	-	Bcl2	ENSMUSG00000057329	B cell leukemia/lymphoma 2 [Source:MGI Symbol;Acc:MGI:88138]	-	gene	Name match	0	0.00266221	0.0120426	-3.56396	-12.2774	-15.8476	-17.783	-19.3449	-27.9331	-27.7293	-16.9409	-22.1661	-18.895	-23.4196	-16.1357	-15.2575	-19.5277	-18.7032	-22.916	-19.5668	-20.7122	-14.0661	-13.6667	-17.2606	-17.3138	-21.615	-21.3504	-14.9644	-14.5193	-15.9677	-17.9408	-16.6674	-17.4173	-20.3212	-19.076	-18.6802	-14.5003	-14.2007	-21.3663
Kdsr	1	106720459	106759727	-	Kdsr	ENSMUSG00000009905	3-ketodihydrosphingosine reductase [Source:MGI Symbol;Acc:MGI:1918000]	-	gene	Name match	0	3.54199e-19	1.31727e-17	-6.49758	-11.5355	-24.0294	-15.7582	-17.18	-25.7682	-20.7119	-21.098	-20.0012	-16.73	-21.2547	-18.1228	-18.53	-17.5397	-16.5383	-20.7511	-17.4019	-18.5473	-19.2724	-17.4351	-15.0957	-15.1488	-12.8552	-19.1855	-12.7995	-12.3544	-13.8027	-15.7759	-14.5025	-15.2524	-18.1563	-16.9111	-16.5153	-12.8797	-13.3052	-19.2014
Cdh19	1	110888326	110977584	-	Cdh19	ENSMUSG00000047216	cadherin 19, type 2 [Source:MGI Symbol;Acc:MGI:3588198]	-	gene	Name match	0	3.43981e-16	9.11589e-15	-9.41736	-13.4528	-17.4254	-25.7096	-13.3546	-26.9528	-26.749	-13.6427	-21.1858	-11.9047	-22.4393	-19.3074	-14.9188	-23.3998	-17.7229	-21.9357	-12.6531	-19.7319	-20.457	-18.6197	-16.2803	-16.3335	-20.6347	-14.5457	-13.9841	-13.539	-14.9874	-10.7211	-15.6871	-16.437	-19.3409	-13.5514	-17.6999	-18.8012	-13.9934	-20.386
Dsel	1	111858702	111864918	-	Dsel	ENSMUSG00000038702	dermatan sulfate epimerase-like [Source:MGI Symbol;Acc:MGI:2442948]	-	gene	Name match	0	3.13421e-13	5.6055e-12	-6.50337	-12.1116	-12.9799	-21.8659	-14.5209	-23.1091	-22.9053	-18.4389	-17.3421	-14.0709	-18.5956	-15.4637	-11.3266	-19.5561	-13.8792	-18.0919	-14.7428	-15.8882	-16.6133	-14.776	-12.4366	-12.4897	-16.791	-16.5264	-10.1404	-9.69528	-11.1436	-13.1168	-11.8434	-12.5933	-15.4972	-14.252	-13.8562	-14.9575	-12.2835	-16.5423
Nifk	1	118321839	118333822	+	Nifk	ENSMUSG00000026377	nucleolar protein interacting with the FHA domain of MKI67 [Source:MGI Symbol;Acc:MGI:1915199]	+	gene	Name match	0	7.05261e-08	6.30044e-07	-7.98588	-13.3215	-22.3172	-14.4223	-15.4677	-24.0559	-23.8521	-19.3857	-18.2889	-15.0178	-19.5424	-16.4105	-16.8178	-20.5029	-14.826	-19.0388	-15.6896	-16.835	-17.5601	-15.7228	-13.3834	-13.4366	-17.7379	-17.4733	-11.0872	-10.6421	-12.0905	-14.0636	-12.7902	-13.5401	-16.444	-15.1988	-14.803	-15.9044	-17.5523	-17.4892
Clasp1	1	118389058	118612678	+	Clasp1	ENSMUSG00000064302	CLIP associating protein 1 [Source:MGI Symbol;Acc:MGI:1923957]	+	gene	Name match	0	4.34307e-14	8.66934e-13	-6.76299	-12.0104	-16.8305	-16.1538	-14.2157	-18.1877	-22.6366	-18.3263	-22.5108	-12.5641	-16.635	-20.6324	-14.9807	-19.5728	-13.4364	-23.2606	-13.8768	-15.8605	-17.4601	-19.9447	-9.75283	-17.6584	-21.9597	-21.6951	-15.309	-14.864	-16.3123	-18.2855	-12.2163	-13.2881	-11.613	-12.2134	-14.4134	-14.6523	-21.7742	-21.711
2900060B14Rik	1	118458652	118459267	-	2900060B14Rik	ENSMUSG00000107722	RIKEN cDNA 2900060B14 gene [Source:MGI Symbol;Acc:MGI:1915454]	-	gene	Name match	0	2.46031e-06	1.76613e-05	-3.55095	-13.5134	-18.0351	-18.5306	-11.1857	-9.6838	-19.5701	-15.1036	-14.0069	-10.7357	-15.2603	-12.1285	-12.5357	-16.2209	-10.544	-14.7567	-11.4076	-12.553	-13.2781	-11.4408	-9.10136	-9.15453	-13.4558	-13.1912	-6.80514	-6.36006	-7.80843	-9.7816	-8.50821	-9.25807	-12.162	-10.9168	-10.521	-11.6223	-13.2702	-13.2071
Ralb	1	119470305	119504794	-	Ralb	ENSMUSG00000004451	v-ral simian leukemia viral oncogene B [Source:MGI Symbol;Acc:MGI:1927244]	-	gene	Name match	0	2.1721e-15	5.15724e-14	-9.76193	-12.5246	-19.2308	-24.3377	-11.8866	-25.581	-25.3772	-16.1738	-19.814	-16.5428	-21.0674	-17.9356	-18.3428	-22.028	-16.3511	-20.5638	-17.2147	-18.3601	-19.0852	-17.2479	-7.58654	-14.9616	-19.2629	-18.9983	-12.6122	-12.1672	-13.6155	-15.5887	-14.3153	-15.0652	-17.9691	-16.7239	-12.0886	-17.4294	-19.0774	-19.0142
Gm27184	1	119520090	119526359	-	Gm27184	ENSMUSG00000098447	predicted gene 27184 [Source:MGI Symbol;Acc:MGI:5521027]	-	gene	Name match	0	0.00763708	0.0322128	-3.0324	-10.2494	-17.0607	-21.8781	-14.5332	-23.1214	-22.9175	-18.4511	-17.3544	-14.0832	-18.6078	-15.4759	-10.9238	-19.5684	-13.8914	-18.1042	-14.755	-15.9005	-16.6255	-14.7883	-12.4488	-12.502	-16.8033	-16.5387	-10.1526	-9.70753	-11.1559	-13.1291	-11.8557	-12.6055	-15.5094	-14.2643	-13.8684	-14.9698	-16.6177	-16.5546
Tmem185b	1	119526160	119528983	+	Tmem185b	ENSMUSG00000098923	transmembrane protein 185B [Source:MGI Symbol;Acc:MGI:1917634]	+	gene	Name match	0	7.05656e-05	0.000410443	-6.08026	-15.7101	-20.2319	-20.7274	-13.3824	-21.9706	-21.7668	-17.3004	-16.2036	-12.9325	-17.4571	-14.3252	-14.7325	-18.4176	-12.7407	-16.9535	-13.6043	-14.7497	-15.4748	-13.6375	-11.2981	-11.3513	-15.6526	-15.388	-9.00187	-8.5568	-10.0052	-11.9783	-10.7049	-11.4548	-14.3587	-13.1135	-12.7177	-13.8191	-15.467	-15.4039
Epb41l5	1	119545037	119649000	-	Epb41l5	ENSMUSG00000026383	erythrocyte membrane protein band 4.1 like 5 [Source:MGI Symbol;Acc:MGI:103006]	-	gene	Name match	0	0.000763119	0.00380395	-6.16236	-11.893	-8.94254	-15.1319	-13.0403	-27.1728	-26.969	-17.0287	-21.4058	-18.1347	-14.0074	-12.5299	-19.9347	-18.2199	-11.8602	-16.5774	-18.8065	-19.9519	-20.677	-18.8397	-16.5003	-16.5535	-15.4933	-15.7377	-14.2041	-13.759	-15.2074	-17.1805	-10.5457	-16.657	-19.5609	-18.3157	-17.9199	-13.2254	-20.6692	-14.7536
Gm37219	1	119630744	119631669	-	Gm37219	ENSMUSG00000102687	predicted gene, 37219 [Source:MGI Symbol;Acc:MGI:5610447]	-	gene	Name match	0	0.000936388	0.00458797	-6.76031	-14.1014	-18.6232	-19.1187	-11.7738	-20.362	-20.1581	-15.6917	-14.595	-11.3238	-15.8484	-12.7166	-13.1238	-16.809	-11.132	-15.3448	-11.9956	-13.1411	-13.8662	-12.0289	-9.68944	-9.74261	-14.0439	-13.7793	-7.39322	-6.94815	-8.39651	-10.3697	-9.09629	-9.84616	-12.75	-11.5049	-11.109	-12.2104	-13.8583	-13.7952
Ptpn4	1	119652467	119837613	-	Ptpn4	ENSMUSG00000026384	protein tyrosine phosphatase, non-receptor type 4 [Source:MGI Symbol;Acc:MGI:1099792]	-	gene	Name match	0	0.000286538	0.00152828	-6.69456	-11.4649	-15.7815	-15.295	-11.1411	-23.9465	-18.9985	-12.8422	-14.5395	-10.4446	-14.0452	-10.7965	-11.8339	-15.974	-8.29145	-15.9294	-19.6391	-12.428	-14.0001	-11.4979	-8.7011	-8.35447	-14.5928	-17.0228	-15.0367	-14.5916	-9.02997	-18.0131	-8.88729	-10.3603	-13.4213	-9.53689	-8.05939	-10.5572	-12.7168	-11.6719
Dbi	1	120113280	120121078	-	Dbi	ENSMUSG00000026385	diazepam binding inhibitor [Source:MGI Symbol;Acc:MGI:94865]	-	gene	Name match	0	8.81461e-11	1.1615e-09	-3.54971	-10.4691	-21.6974	-22.1929	-4.67224	-6.59761	-23.2323	-18.7659	-17.6692	-7.08614	-18.9226	-9.93832	-16.198	-19.8832	-14.2063	-18.419	-15.0699	-16.2153	-16.9404	-11.4916	-12.7636	-12.8168	-17.1181	-8.48233	-10.4674	-10.0224	-11.4707	-13.4439	-12.1705	-12.9204	-15.8242	-14.5791	-14.1833	-15.2846	-16.9325	-16.8694
Steap3	1	120190757	120272705	-	Steap3	ENSMUSG00000026389	STEAP family member 3 [Source:MGI Symbol;Acc:MGI:1915678]	-	gene	Name match	0	2.61193e-13	4.72124e-12	-8.29018	-12.8548	-21.2383	-25.5863	-12.5348	-20.569	-26.6257	-17.3069	-21.0626	-17.7914	-18.164	-19.1841	-19.5914	-23.2766	-13.5407	-21.8124	-18.4632	-19.6087	-14.567	-18.4964	-16.157	-16.2102	-20.5115	-20.2469	-13.8608	-13.4157	-14.8641	-16.8373	-15.5639	-11.8398	-19.2176	-17.9725	-17.5766	-18.678	-16.267	-15.1566
Insig2	1	121304353	121332589	-	Insig2	ENSMUSG00000003721	insulin induced gene 2 [Source:MGI Symbol;Acc:MGI:1920249]	-	gene	Name match	0	4.37682e-08	4.0107e-07	-3.51273	-12.5223	-23.5536	-16.7679	-16.7042	-6.44172	-20.0297	-20.6222	-19.5254	-7.87342	-20.7789	-17.647	-18.0542	-21.7394	-16.0625	-15.2653	-16.9261	-18.0715	-18.7966	-9.98712	-14.6199	-14.673	-18.9743	-13.6997	-12.3236	-11.8786	-13.3269	-15.3001	-14.0267	-14.7766	-17.6805	-16.4353	-16.0395	-17.1408	-18.7888	-18.7256
Ccdc93	1	121431049	121506460	+	Ccdc93	ENSMUSG00000026339	coiled-coil domain containing 93 [Source:MGI Symbol;Acc:MGI:1918079]	+	gene	Name match	0	0.0106426	0.0437188	-1.42934	-11.2859	-16.5852	-17.076	-18.1214	-26.7096	-26.5058	-22.0394	-20.9426	-17.6714	-22.1961	-19.0642	-19.4715	-23.1566	-17.4797	-21.6925	-18.3433	-19.4887	-11.3753	-18.3765	-16.0371	-16.0902	-20.3915	-15.4514	-13.7409	-13.2958	-14.7442	-16.7173	-11.5915	-16.1938	-19.0977	-14.0001	-17.4567	-18.558	-14.1232	-20.1428
Actr3	1	125392905	125435727	-	Actr3	ENSMUSG00000026341	ARP3 actin-related protein 3 [Source:MGI Symbol;Acc:MGI:1921367]	-	gene	Name match	0	6.93401e-11	9.27427e-10	-7.63389	-9.84405	-16.9044	-16.2595	-17.305	-21.1563	-25.6894	-15.3985	-20.1262	-11.7961	-21.3797	-18.2478	-18.655	-22.3402	-16.6633	-13.0167	-17.5269	-18.6723	-19.3974	-17.5601	-15.2207	-15.2738	-14.9637	-19.3105	-12.9244	-12.4794	-13.9277	-15.9009	-14.6275	-15.3774	-18.2813	-17.0361	-10.8444	-17.7416	-19.3896	-14.6509
Slc35f5	1	125560595	125595820	+	Slc35f5	ENSMUSG00000026342	solute carrier family 35, member F5 [Source:MGI Symbol;Acc:MGI:1921400]	+	gene	Name match	0	2.91074e-07	2.38317e-06	-8.35673	-12.366	-23.8727	-24.3682	-12.0133	-25.6115	-25.4076	-16.2042	-19.8445	-16.5733	-21.0979	-17.966	-18.3733	-22.0585	-16.3815	-13.8724	-17.2451	-18.3906	-19.1156	-17.2784	-14.9389	-14.9921	-19.2934	-19.0288	-12.6427	-12.1976	-13.646	-15.6192	-14.3458	-15.0956	-12.8933	-16.7544	-16.3585	-17.4599	-19.1078	-19.0447
Mgat5	1	127205015	127488336	+	Mgat5	ENSMUSG00000036155	mannoside acetylglucosaminyltransferase 5 [Source:MGI Symbol;Acc:MGI:894701]	+	gene	Name match	0	0.00588574	0.0252659	-4.8701	-12.1205	-16.0211	-17.7563	-15.4196	-19.5846	-28.4153	-19.3375	-22.8522	-14.6741	-16.2883	-16.4998	-21.381	-25.0662	-15.1498	-13.9906	-20.2529	-15.4914	-22.1234	-20.2861	-17.9467	-11.7185	-22.3011	-22.0365	-15.6504	-15.2054	-16.6537	-18.6269	-17.3535	-18.1034	-21.0072	-19.7621	-19.3663	-20.4676	-22.1155	-16.4741
Gm37510	1	127270524	127275285	+	Gm37510	ENSMUSG00000104378	predicted gene, 37510 [Source:MGI Symbol;Acc:MGI:5610738]	+	gene	Name match	0	0.00262891	0.0119146	-6.18828	-16.4639	-20.9857	-21.4812	-14.1363	-22.7245	-22.5206	-18.0542	-16.9575	-13.6863	-18.2109	-15.079	-15.4863	-19.1715	-13.4945	-17.7073	-14.3581	-15.5036	-16.2286	-14.3914	-12.0519	-12.1051	-16.4064	-16.1418	-9.7557	-9.31063	-10.759	-12.7322	-11.4588	-12.2086	-15.1125	-13.8674	-13.4715	-14.5729	-16.2208	-16.1577
Ccnt2	1	127774164	127808061	+	Ccnt2	ENSMUSG00000026349	cyclin T2 [Source:MGI Symbol;Acc:MGI:1920199]	+	gene	Name match	0	3.85895e-05	0.000233538	-2.58176	-10.7903	-23.8172	-14.0654	-16.9678	-25.556	-25.3522	-20.8858	-19.789	-16.5179	-21.0425	-17.9106	-18.3179	-22.003	-16.3261	-20.5389	-17.1897	-18.3351	-19.0602	-17.2229	-14.8835	-14.9367	-19.2379	-18.9733	-12.5873	-12.1422	-13.5906	-15.5637	-14.2903	-15.0402	-17.9441	-16.6989	-11.2442	-17.4045	-14.4409	-18.9892
Rab3gap1	1	127868773	127943868	+	Rab3gap1	ENSMUSG00000036104	RAB3 GTPase activating protein subunit 1 [Source:MGI Symbol;Acc:MGI:2445001]	+	gene	Name match	0	9.37821e-06	6.23072e-05	-5.25929	-12.1111	-24.9648	-18.3894	-18.1154	-21.3816	-26.4997	-22.0333	-20.9366	-17.6654	-22.19	-19.0581	-19.4654	-23.1506	-17.4736	-21.6864	-18.3372	-19.4827	-20.2077	-18.3705	-16.031	-16.0842	-20.3855	-20.1209	-13.7348	-13.2897	-14.7381	-16.7113	-15.4379	-16.1877	-19.0916	-17.8465	-17.4506	-18.552	-20.1999	-20.1368
R3hdm1	1	128103301	128237736	+	R3hdm1	ENSMUSG00000056211	R3H domain containing 1 [Source:MGI Symbol;Acc:MGI:2448514]	+	gene	Name match	0	0.00177974	0.00828086	-2.17058	-11.6965	-25.8049	-8.72952	-18.9555	-23.8067	-27.3398	-18.634	-21.7767	-18.5055	-23.0301	-12.9261	-16.6941	-23.9907	-13.7023	-22.5265	-12.7774	-20.3228	-21.0479	-19.2106	-11.8122	-16.9243	-21.2256	-20.961	-14.5749	-14.1298	-15.5782	-17.5514	-16.278	-17.0278	-13.8255	-18.6866	-18.2907	-12.9922	-21.04	-15.097
Ubxn4	1	128243964	128279378	+	Ubxn4	ENSMUSG00000026353	UBX domain protein 4 [Source:MGI Symbol;Acc:MGI:1915062]	+	gene	Name match	0	7.94756e-10	9.16002e-09	-3.83554	-11.1139	-19.5585	-10.3013	-17.031	-25.6192	-25.4153	-17.3375	-19.8522	-16.581	-21.1056	-17.9738	-18.381	-22.0662	-16.3893	-20.602	-17.2529	-18.3983	-19.1234	-17.2861	-9.75025	-14.9998	-19.3011	-19.0365	-12.6504	-12.2053	-13.6537	-15.6269	-14.3535	-15.1034	-18.0072	-16.7621	-16.3663	-17.4676	-19.1155	-19.0524
Dars	1	128363707	128417368	-	Dars	ENSMUSG00000026356	aspartyl-tRNA synthetase [Source:MGI Symbol;Acc:MGI:2442544]	-	gene	Name match	0	2.6558e-06	1.89919e-05	-3.63541	-13.5583	-24.4799	-16.7097	-12.7236	-12.4193	-20.693	-21.5485	-20.4517	-17.1806	-21.7052	-18.5733	-14.5806	-17.7064	-11.6669	-21.2016	-17.8524	-18.9978	-19.7229	-17.8856	-9.18473	-15.5994	-19.9006	-19.636	-13.25	-12.8049	-14.2533	-16.2264	-14.953	-15.7029	-18.6068	-17.3616	-11.8138	-18.0672	-15.3151	-19.6519
Cd55b	1	130388537	130423009	-	Cd55b	ENSMUSG00000026401	CD55 molecule, decay accelerating factor for complement B [Source:MGI Symbol;Acc:MGI:104849]	-	gene	Name match	0	6.10869e-08	5.49999e-07	-5.58055	-14.7754	-16.8951	-16.9659	-16.9921	-25.5803	-25.3764	-20.91	-10.3349	-16.5421	-21.0667	-17.9349	-13.7978	-22.0273	-16.3504	-20.5631	-17.214	-18.3594	-19.0845	-17.2472	-14.9078	-14.9609	-19.2622	-18.9976	-12.6115	-12.1665	-13.6148	-15.588	-14.3146	-15.0645	-17.9683	-16.7232	-16.3274	-17.4287	-19.0766	-19.0135
Gm15675	1	130429781	130437191	-	Gm15675	ENSMUSG00000086825	predicted gene 15675 [Source:MGI Symbol;Acc:MGI:3783117]	-	gene	Name match	0	8.33495e-08	7.36834e-07	-7.39981	-17.102	-21.6238	-22.1193	-14.7744	-23.3626	-23.1587	-18.6923	-17.5956	-14.3244	-18.849	-15.7171	-16.1244	-19.8096	-14.1326	-18.3454	-14.9962	-16.1417	-16.8667	-15.0295	-12.69	-12.7432	-17.0445	-16.7799	-10.3938	-9.94873	-11.3971	-13.3703	-12.0969	-12.8467	-15.7506	-14.5055	-14.1096	-15.211	-16.8589	-16.7958
Cd55	1	130439027	130462744	-	Cd55	ENSMUSG00000026399	CD55 molecule, decay accelerating factor for complement [Source:MGI Symbol;Acc:MGI:104850]	-	gene	Name match	0	5.22734e-34	7.98482e-32	-10.974	-10.8535	-23.302	-23.7976	-16.4526	-25.0408	-24.837	-16.1311	-19.2738	-16.0026	-20.5273	-17.3954	-17.8026	-21.4878	-15.8109	-20.0236	-16.6745	-17.8199	-18.545	-16.7077	-14.3683	-14.4214	-18.7227	-18.4581	-12.072	-11.627	-13.0753	-15.0485	-13.7751	-14.525	-17.4289	-16.1837	-15.7879	-16.8892	-18.5372	-18.474
Gm16083	1	130462576	130557075	+	Gm16083	ENSMUSG00000085526	predicted gene 16083 [Source:MGI Symbol;Acc:MGI:3802163]	+	gene	Name match	0	1.17533e-07	1.01854e-06	-5.85148	-11.8347	-15.0516	-11.1549	-10.4812	-27.0352	-20.5918	-22.3649	-21.2681	-12.1725	-22.5216	-19.3897	-10.9515	-15.7755	-17.8052	-22.018	-13.5626	-14.4923	-20.5393	-13.0265	-11.0407	-16.4158	-20.7171	-20.4525	-14.0664	-13.6213	-15.0697	-17.0428	-8.83609	-16.5193	-13.0233	-10.8461	-17.7822	-18.8836	-20.5315	-20.4684
Yod1	1	130717327	130724358	+	Yod1	ENSMUSG00000046404	YOD1 deubiquitinase [Source:MGI Symbol;Acc:MGI:2442596]	+	gene	Name match	0	1.07243e-19	4.18976e-18	-7.76214	-10.6845	-21.5481	-13.6532	-14.6986	-23.2868	-23.083	-18.6166	-17.5198	-9.70434	-18.7733	-15.6414	-16.0487	-13.8005	-14.0569	-18.2697	-14.9205	-16.0659	-16.791	-14.9537	-12.6143	-12.6675	-16.9688	-16.7042	-10.3181	-9.873	-11.3214	-13.2945	-12.0211	-12.771	-15.6749	-14.4297	-14.0339	-15.1353	-16.7832	-16.7201
Rassf5	1	131176410	131245258	-	Rassf5	ENSMUSG00000026430	Ras association (RalGDS/AF-6) domain family member 5 [Source:MGI Symbol;Acc:MGI:1926375]	-	gene	Name match	0	4.73262e-08	4.32005e-07	-8.60368	-11.8214	-15.2845	-15.0333	-12.1376	-26.5783	-26.3744	-21.908	-20.8113	-17.5401	-22.0647	-18.9328	-19.3401	-23.0253	-17.3483	-21.5611	-18.2119	-19.3574	-20.0824	-18.2452	-15.9057	-15.9589	-20.2602	-19.9956	-13.6095	-13.1644	-14.6128	-16.586	-15.3126	-16.0624	-18.9663	-17.7212	-17.3253	-18.4267	-20.0746	-20.0115
Srgap2	1	131285251	131527352	-	Srgap2	ENSMUSG00000026425	SLIT-ROBO Rho GTPase activating protein 2 [Source:MGI Symbol;Acc:MGI:109605]	-	gene	Name match	0	2.77865e-13	4.99469e-12	-8.3544	-11.2613	-10.752	-16.4502	-13.3668	-21.0407	-21.7327	-16.6997	-22.6254	-19.3542	-23.8788	-20.7469	-21.1542	-24.8394	-19.1624	-23.3752	-20.026	-15.1126	-21.8966	-20.0593	-12.4385	-12.763	-22.0743	-21.8097	-15.4236	-14.9785	-16.4269	-18.4001	-11.9303	-17.8765	-20.7804	-19.5353	-19.1394	-20.2408	-21.8887	-21.8256
Rab7b	1	131688695	131715439	+	Rab7b	ENSMUSG00000052688	RAB7B, member RAS oncogene family [Source:MGI Symbol;Acc:MGI:2442295]	+	gene	Name match	0	1.5939e-09	1.76395e-08	-7.18056	-14.6316	-15.0897	-23.9708	-12.0145	-25.2141	-25.0102	-14.4611	-19.4471	-16.1759	-20.7005	-17.5687	-17.9759	-21.6611	-15.9842	-15.5855	-16.8478	-14.3818	-18.7183	-16.881	-14.5416	-14.5947	-18.896	-18.6314	-12.2453	-11.8003	-13.2486	-15.2218	-13.9484	-14.6983	-13.6428	-16.357	-15.9612	-17.0625	-18.7104	-18.6473
Slc41a1	1	131827493	131848865	+	Slc41a1	ENSMUSG00000013275	solute carrier family 41, member 1 [Source:MGI Symbol;Acc:MGI:2444823]	+	gene	Name match	0	6.31759e-05	0.000370732	-6.45832	-11.3906	-23.1518	-15.7405	-16.3024	-24.8906	-24.6868	-20.2204	-19.1236	-15.8524	-20.3771	-17.2452	-17.6524	-21.3376	-15.6607	-19.8734	-11.98	-12.7628	-18.3948	-16.5575	-14.2181	-14.2712	-18.5725	-18.3079	-11.9219	-11.4768	-12.9251	-14.8983	-13.6249	-14.3748	-17.2787	-16.0335	-15.6377	-16.739	-18.387	-18.3238
Rab29	1	131867224	131872887	+	Rab29	ENSMUSG00000026433	RAB29, member RAS oncogene family [Source:MGI Symbol;Acc:MGI:2385107]	+	gene	Name match	0	0.00121737	0.00584319	-6.61301	-16.7142	-21.2359	-14.9212	-14.3865	-17.5748	-22.7709	-18.3045	-17.2077	-13.9365	-18.4612	-15.3293	-15.7365	-19.4217	-13.7448	-9.68143	-14.6084	-15.7538	-16.4789	-14.6416	-12.3022	-12.3553	-16.6566	-16.392	-10.006	-9.56088	-11.0093	-12.9824	-11.709	-12.4589	-15.3628	-14.1176	-13.7218	-14.8231	-16.4711	-16.4079
Nucks1	1	131910534	131936321	+	Nucks1	ENSMUSG00000026434	nuclear casein kinase and cyclin-dependent kinase substrate 1 [Source:MGI Symbol;Acc:MGI:1934811]	+	gene	Name match	0	7.77628e-16	1.9601e-14	-5.67835	-10.3958	-23.4227	-14.9176	-16.5733	-19.8802	-24.9577	-15.21	-19.3945	-16.1234	-20.648	-17.5161	-17.9234	-21.6085	-15.9316	-20.1444	-13.0582	-17.9406	-18.6657	-16.8284	-14.489	-14.5422	-18.8434	-18.5788	-12.1928	-11.7477	-13.1961	-9.88794	-13.8958	-14.6457	-17.5496	-16.3044	-15.9086	-17.01	-18.6579	-18.5947
Gm37676	1	131932464	131932970	-	Gm37676	ENSMUSG00000103975	predicted gene, 37676 [Source:MGI Symbol;Acc:MGI:5610904]	-	gene	Name match	0	0.00230464	0.0105416	-5.17077	-13.2324	-17.7542	-18.2497	-10.9048	-19.493	-19.2891	-14.8227	-13.726	-10.4548	-14.9794	-11.8475	-12.2548	-15.94	-10.263	-14.4758	-11.1266	-12.2721	-12.9971	-11.1598	-8.82042	-8.87358	-13.1749	-12.9103	-6.52419	-6.07912	-7.52749	-9.50066	-8.22726	-8.97713	-11.881	-10.6359	-10.24	-11.3414	-12.9893	-12.9262
Elk4	1	132007607	132032612	+	Elk4	ENSMUSG00000026436	ELK4, member of ETS oncogene family [Source:MGI Symbol;Acc:MGI:102853]	+	gene	Name match	0	5.58248e-12	8.60113e-11	-7.18442	-13.2127	-23.3783	-13.9033	-11.7919	-17.8776	-24.9133	-14.651	-14.5543	-16.0789	-20.6035	-11.1498	-17.8789	-18.2422	-15.8872	-15.9479	-7.01756	-17.8962	-18.6213	-10.6778	-14.4446	-14.4977	-18.799	-18.5344	-12.1483	-11.7033	-13.1516	-15.1248	-13.8514	-7.73502	-17.5052	-16.26	-15.8642	-16.9655	-12.6541	-18.5503
Mfsd4a	1	132022806	132068062	-	Mfsd4a	ENSMUSG00000059149	major facilitator superfamily domain containing 4A [Source:MGI Symbol;Acc:MGI:2442786]	-	gene	Name match	0	7.0628e-05	0.000410739	-5.77674	-12.1175	-24.2342	-24.7297	-10.8405	-25.973	-25.7691	-21.3027	-20.206	-16.9348	-21.4594	-18.3275	-18.7348	-19.098	-16.743	-20.9558	-13.8697	-18.7521	-19.4771	-17.6399	-15.3004	-15.3536	-19.6549	-19.3903	-13.0042	-12.5591	-14.0075	-15.9807	-14.7073	-15.4571	-18.361	-17.1159	-16.72	-17.8214	-19.4693	-14.5537
Nuak2	1	132316126	132333488	+	Nuak2	ENSMUSG00000009772	NUAK family, SNF1-like kinase, 2 [Source:MGI Symbol;Acc:MGI:1921387]	+	gene	Name match	0	0.00073746	0.00368792	-7.26468	-12.201	-22.8521	-23.3476	-16.0027	-19.1169	-24.387	-19.9206	-14.4239	-15.5527	-20.0773	-16.9454	-17.3527	-21.0378	-11.2089	-19.5737	-16.2245	-13.1305	-18.095	-16.2577	-13.9183	-13.9715	-18.2728	-18.0082	-11.6221	-11.177	-12.6254	-14.5985	-13.3252	-14.075	-16.9789	-15.7337	-15.3379	-16.4393	-18.0872	-18.0241
Dstyk	1	132417555	132466958	+	Dstyk	ENSMUSG00000042046	dual serine/threonine and tyrosine protein kinase [Source:MGI Symbol;Acc:MGI:1925064]	+	gene	Name match	0	1.71278e-13	3.1565e-12	-5.66415	-11.3206	-24.3607	-16.4706	-17.5113	-26.0995	-25.8956	-16.6333	-16.0105	-17.0613	-21.5859	-18.454	-18.8613	-22.5465	-16.8695	-21.0823	-17.7331	-18.8786	-19.6036	-17.7663	-15.4269	-15.4801	-19.7814	-19.5168	-13.1307	-12.6856	-14.134	-16.1072	-14.8338	-15.5836	-18.4875	-17.2424	-16.8465	-17.9479	-19.5958	-19.5327
Rbbp5	1	132477365	132505659	+	Rbbp5	ENSMUSG00000026439	retinoblastoma binding protein 5, histone lysine methyltransferase complex subunit [Source:MGI Symbol;Acc:MGI:1918367]	+	gene	Name match	0	0.0003844	0.00201283	-2.88683	-12.7743	-15.1662	-16.8021	-16.7072	-25.2954	-25.0915	-16.3032	-19.5284	-16.2572	-20.7818	-10.8397	-18.0572	-21.7424	-16.0654	-16.1262	-16.929	-18.0745	-18.7996	-16.9623	-9.26138	-14.676	-18.9773	-18.7127	-12.3266	-11.8815	-13.3299	-15.3031	-14.0297	-14.7795	-17.6834	-16.4383	-16.0424	-17.1438	-18.7917	-18.7286
Mdm4	1	132959484	133030561	-	Mdm4	ENSMUSG00000054387	transformed mouse 3T3 cell double minute 4 [Source:MGI Symbol;Acc:MGI:107934]	-	gene	Name match	0	1.12673e-21	5.27651e-20	-9.60328	-11.4736	-24.8854	-17.8981	-13.5621	-22.4722	-26.4204	-15.4269	-20.8572	-17.5861	-22.1107	-18.9788	-19.3861	-23.0712	-12.0328	-21.6071	-13.784	-19.4033	-20.1284	-18.2911	-15.9517	-16.0049	-20.3061	-14.1891	-13.6555	-13.2104	-14.6588	-16.6319	-15.3585	-16.1084	-19.0123	-17.7671	-17.3713	-18.4727	-20.1206	-20.0574
Pik3c2b	1	133045667	133108687	+	Pik3c2b	ENSMUSG00000026447	phosphatidylinositol-4-phosphate 3-kinase catalytic subunit type 2 beta [Source:MGI Symbol;Acc:MGI:2685045]	+	gene	Name match	0	0.00654106	0.0279442	-3.41232	-10.0395	-24.7119	-15.9287	-17.8625	-20.9063	-26.2468	-21.7804	-20.6837	-17.4125	-21.9371	-18.8052	-14.3056	-22.8977	-12.8208	-21.4335	-18.0843	-19.2298	-19.9548	-18.1175	-15.7781	-15.8313	-20.1326	-19.868	-13.4819	-13.0368	-14.4852	-16.4584	-15.185	-15.9348	-18.8387	-12.8566	-17.1977	-18.2991	-19.947	-19.8839
Plekha6	1	133164210	133303435	+	Plekha6	ENSMUSG00000041757	pleckstrin homology domain containing, family A member 6 [Source:MGI Symbol;Acc:MGI:2388662]	+	gene	Name match	0	3.4493e-21	1.54614e-19	-9.14631	-10.909	-17.9892	-18.0391	-12.2246	-20.1661	-27.3903	-22.9239	-21.8272	-18.556	-23.0806	-14.7524	-13.9002	-24.0412	-18.3643	-22.577	-19.2278	-20.3733	-21.0984	-19.2611	-16.9216	-12.0155	-21.2761	-21.0115	-14.6254	-14.1803	-15.6287	-17.6019	-16.3285	-17.0784	-14.8302	-14.0615	-12.4344	-19.4426	-15.415	-21.0274
Snrpe	1	133603871	133610291	-	Snrpe	ENSMUSG00000090553	small nuclear ribonucleoprotein E [Source:MGI Symbol;Acc:MGI:98346]	-	gene	Name match	0	3.81875e-10	4.58856e-09	-4.16353	-12.0993	-21.4169	-13.5316	-14.5675	-23.1557	-18.4779	-18.4854	-17.3887	-14.1175	-18.6421	-15.5103	-15.9175	-19.6027	-13.9258	-18.1385	-14.7894	-15.9348	-16.6599	-14.8226	-12.4832	-12.5363	-16.8376	-16.573	-10.1869	-9.74186	-11.1902	-13.1634	-11.89	-12.6399	-15.5437	-14.2986	-13.9028	-15.0041	-16.652	-16.5889
Zc3h11a	1	133619862	133661380	-	Zc3h11a	ENSMUSG00000102976	zinc finger CCCH type containing 11A [Source:MGI Symbol;Acc:MGI:1917829]	-	gene	Name match	0	0	0	-11.5198	-11.6613	-18.5655	-16.2197	-10.8796	-25.8486	-25.6447	-21.1783	-20.0816	-16.8104	-21.335	-13.097	-18.6104	-22.2956	-16.6187	-20.8314	-17.4823	-18.6277	-19.3528	-17.5155	-15.1761	-15.2292	-19.5305	-19.2659	-12.8798	-12.4348	-13.8831	-15.8563	-14.5829	-15.3328	-18.2366	-10.7734	-16.5957	-17.697	-19.3449	-14.7375
Zc3h11a	1	133619871	133661380	-	Zc3h11a	ENSMUSG00000102976	zinc finger CCCH type containing 11A [Source:MGI Symbol;Acc:MGI:1917829]	-	gene	Name match	0	0	0	-11.3135	-11.661	-18.5652	-16.2194	-10.8793	-25.8483	-25.6444	-21.178	-20.0813	-16.8101	-21.3347	-13.0967	-18.6101	-22.2953	-16.6184	-20.8311	-17.4819	-18.6274	-19.3525	-17.5152	-15.1757	-15.2289	-19.5302	-19.2656	-12.8795	-12.4344	-13.8828	-15.856	-14.5826	-15.3325	-18.2363	-10.7731	-16.5954	-17.6967	-19.3446	-14.7372
Gm38394	1	133619940	133661318	-	Gm38394	ENSMUSG00000094410	predicted gene, 38394 [Source:MGI Symbol;Acc:MGI:5614057]	-	gene	Name match	0	0	0	-11.3755	-11.6564	-18.5606	-16.2148	-10.8747	-25.8437	-25.6399	-21.1735	-20.0767	-16.8056	-21.3302	-13.0921	-18.6056	-22.2907	-16.6138	-20.8266	-17.4774	-18.6228	-19.3479	-17.5106	-15.1712	-15.2244	-19.5256	-19.261	-12.875	-12.4299	-13.8783	-15.8514	-14.578	-15.3279	-18.2318	-10.7685	-16.5908	-17.6922	-19.3401	-14.7326
Zbed6	1	133655879	133660885	-	Zbed6	ENSMUSG00000102049	zinc finger, BED type containing 6 [Source:MGI Symbol;Acc:MGI:3828086]	-	gene	Name match	0	0.00125633	0.00600833	-6.99171	-8.86074	-21.0581	-13.168	-7.82783	-22.7969	-22.593	-18.1266	-17.0299	-13.7587	-18.2833	-15.1514	-15.5587	-19.2438	-13.5669	-17.7797	-14.4305	-15.5759	-16.301	-14.4637	-12.1243	-12.1775	-16.4788	-16.2142	-9.82808	-9.38301	-10.8314	-12.8045	-11.5312	-12.281	-15.1849	-13.9397	-13.5439	-14.6453	-16.2932	-16.2301
Atp2b4	1	133699457	133801041	-	Atp2b4	ENSMUSG00000026463	ATPase, Ca++ transporting, plasma membrane 4 [Source:MGI Symbol;Acc:MGI:88111]	-	gene	Name match	0	1.56196e-08	1.51229e-07	-4.67859	-11.7903	-16.7056	-16.9893	-11.5166	-23.528	-26.9356	-15.6733	-16.9725	-18.1013	-16.152	-19.494	-16.0488	-23.5864	-17.9095	-22.1223	-18.7731	-15.8596	-20.6436	-14.7474	-16.4669	-16.5201	-20.8214	-20.5568	-14.1707	-13.7256	-15.174	-17.1471	-15.8738	-16.6236	-19.5275	-18.2823	-17.8865	-18.9879	-20.6358	-20.5727
Gm15851	1	133906531	133914822	+	Gm15851	ENSMUSG00000090208	predicted gene 15851 [Source:MGI Symbol;Acc:MGI:3801734]	+	gene	Name match	0	1.08413e-13	2.0656e-12	-4.00542	-11.4116	-17.3119	-22.2814	-10.6145	-23.5246	-23.3208	-14.5324	-17.7576	-7.6202	-19.0111	-15.8792	-16.2864	-19.9716	-14.2947	-10.1218	-15.1583	-16.3037	-17.0288	-15.1915	-12.8521	-12.9052	-17.2065	-16.9419	-10.5559	-10.1108	-11.5591	-13.5323	-12.2589	-13.0088	-15.9127	-14.6675	-14.2717	-15.373	-17.021	-16.9578
Prelp	1	133910304	133921414	-	Prelp	ENSMUSG00000041577	proline arginine-rich end leucine-rich repeat [Source:MGI Symbol;Acc:MGI:2151110]	-	gene	Name match	0	7.56717e-13	1.30108e-11	-4.50914	-11.8338	-22.208	-22.7036	-15.3586	-23.9468	-23.743	-19.2766	-18.1798	-7.21748	-19.4333	-16.3014	-16.7086	-20.3938	-14.7169	-10.544	-15.5805	-16.7259	-17.451	-15.6137	-13.2743	-13.3274	-17.6287	-17.3641	-10.9781	-10.533	-11.9813	-13.9545	-12.6811	-13.431	-16.3349	-15.0897	-14.6939	-15.7952	-17.4432	-17.38
Fmod	1	134037254	134048277	+	Fmod	ENSMUSG00000041559	fibromodulin [Source:MGI Symbol;Acc:MGI:1328364]	+	gene	Name match	0	0.00225578	0.0103368	6.68145	-13.1306	-15.162	-13.8123	-15.3473	-23.9355	-23.7316	-19.2652	-18.1685	-5.51408	-19.4219	-11.0937	-16.6973	-20.3825	-14.7055	-10.5327	-15.5691	-9.57389	-17.4397	-15.6024	-13.2629	-13.3161	-17.6174	-17.3528	-10.9667	-10.5216	-11.97	-13.9432	-12.6698	-13.4196	-16.3235	-15.0784	-14.6825	-15.7839	-17.4318	-17.3687
Btg2	1	134075170	134079120	-	Btg2	ENSMUSG00000020423	B cell translocation gene 2, anti- proliferative [Source:MGI Symbol;Acc:MGI:108384]	-	gene	Name match	0	2.67652e-26	2.00547e-24	-6.33791	-10.9551	-20.7163	-21.2119	-13.8669	-22.4551	-22.2513	-12.878	-16.6881	-13.4169	-17.9416	-14.8097	-15.2169	-18.9021	-13.2252	-17.438	-14.0888	-15.2342	-15.9593	-14.122	-11.7826	-11.8357	-11.6631	-15.8724	-9.48635	-9.04128	-10.4896	-12.4628	-11.1894	-11.9393	-14.8432	-13.598	-13.2022	-14.3035	-15.9515	-15.8883
Cyb5r1	1	134405559	134411740	+	Cyb5r1	ENSMUSG00000026456	cytochrome b5 reductase 1 [Source:MGI Symbol;Acc:MGI:1919267]	+	gene	Name match	0	1.74384e-08	1.6797e-07	-6.03466	-10.9071	-21.3622	-21.8577	-14.5128	-23.101	-19.4232	-18.4307	-17.334	-14.0628	-18.5874	-15.4556	-15.8628	-19.548	-13.871	-18.0838	-14.7346	-15.8801	-16.6052	-14.7679	-12.4284	-12.4816	-16.7829	-16.5183	-10.1322	-9.68714	-11.1355	-13.1087	-11.8353	-12.5851	-15.489	-14.2439	-13.848	-14.9494	-16.5973	-16.5342
Adipor1	1	134415378	134433351	+	Adipor1	ENSMUSG00000026457	adiponectin receptor 1 [Source:MGI Symbol;Acc:MGI:1919924]	+	gene	Name match	0	0.000613189	0.00310529	-2.32745	-10.3517	-17.1352	-14.4608	-16.0525	-6.60615	-3.94656	-15.359	-18.8737	-10.093	-20.1272	-10.6145	-17.4026	-21.0877	-15.4108	-19.6236	-16.2744	-17.4198	-18.1449	-16.3076	-13.9682	-14.0214	-18.3227	-18.0581	-11.672	-11.2269	-12.6753	-14.6484	-3.99182	-4.95332	-17.0288	-6.40042	-15.3878	-6.88389	-18.1371	-18.074
Klhl12	1	134455531	134491018	+	Klhl12	ENSMUSG00000026455	kelch-like 12 [Source:MGI Symbol;Acc:MGI:2385619]	+	gene	Name match	0	9.02905e-08	7.93856e-07	-3.87658	-11.9428	-16.0171	-17.2496	-10.4896	-25.6222	-20.3121	-15.045	-19.8552	-16.584	-21.1086	-12.4324	-18.384	-22.0692	-11.1109	-20.605	-17.2558	-18.4013	-19.1263	-11.071	-14.9496	-15.0028	-19.3041	-19.0395	-12.6534	-12.2083	-13.6567	-15.6299	-14.3565	-15.1063	-18.0102	-16.7651	-16.3692	-12.3644	-13.2386	-13.859
Rabif	1	134494648	134508774	+	Rabif	ENSMUSG00000042229	RAB interacting factor [Source:MGI Symbol;Acc:MGI:2138605]	+	gene	Name match	0	7.97784e-09	8.0573e-08	-6.95999	-12.5588	-22.5545	-14.1232	-15.7051	-24.2933	-20.6155	-19.623	-18.5263	-15.2551	-19.7797	-16.6479	-17.0551	-20.7403	-15.0633	-19.2761	-15.9269	-17.0724	-17.7975	-15.9602	-13.6207	-13.6739	-17.9752	-17.7106	-11.3245	-10.8794	-12.3278	-14.301	-13.0276	-13.7775	-16.6813	-15.4362	-15.0403	-16.1417	-17.7896	-17.7265
Kdm5b	1	134560171	134635285	+	Kdm5b	ENSMUSG00000042207	lysine (K)-specific demethylase 5B [Source:MGI Symbol;Acc:MGI:1922855]	+	gene	Name match	0	7.48195e-15	1.64682e-13	-5.63038	-12.3372	-16.0784	-16.9035	-18.1157	-20.6693	-20.2396	-17.8817	-15.6975	-17.6658	-22.1904	-14.4471	-19.4658	-23.1509	-17.474	-21.6868	-18.3376	-19.483	-15.6638	-18.3708	-16.0314	-16.0846	-20.3858	-20.1212	-13.7352	-13.2901	-14.7385	-16.7116	-15.4382	-16.1881	-14.692	-17.8468	-12.441	-12.619	-14.7263	-15.1778
Ppp1r12b	1	134754658	134955942	-	Ppp1r12b	ENSMUSG00000073557	protein phosphatase 1, regulatory subunit 12B [Source:MGI Symbol;Acc:MGI:1916417]	-	gene	Name match	0	0.00637052	0.0272385	-1.65	-11.8981	-16.4687	-17.4476	-10.5278	-19.2495	-17.9373	-18.9818	-22.359	-19.0878	-23.6124	-20.4806	-16.3435	-24.573	-12.5741	-17.1755	-19.7597	-20.9051	-21.6302	-14.393	-11.9091	-13.0327	-17.5684	-21.5433	-15.1572	-14.7122	-16.1605	-18.1337	-12.5384	-17.6102	-20.514	-19.2689	-18.8731	-13.8224	-15.6124	-17.0853
Ptprv	1	135108497	135132594	-	Ptprv	ENSMUSG00000097993	protein tyrosine phosphatase, receptor type, V [Source:MGI Symbol;Acc:MGI:108027]	-	gene	Name match	0	0.00570736	0.0245297	-3.11472	-10.5584	-10.6212	-23.8205	-16.4755	-25.0637	-24.8599	-20.3935	-19.2967	-16.0256	-20.5502	-17.4183	-17.8256	-21.5107	-15.8338	-20.0466	-16.6974	-17.8428	-18.5679	-16.7306	-14.3912	-14.4444	-18.7457	-18.4811	-12.095	-11.6499	-13.0983	-15.0714	-13.798	-14.5479	-17.4518	-16.2066	-15.8108	-16.9122	-18.5601	-18.497
Arl8a	1	135146824	135156269	+	Arl8a	ENSMUSG00000026426	ADP-ribosylation factor-like 8A [Source:MGI Symbol;Acc:MGI:1915974]	+	gene	Name match	0	2.63549e-07	2.17079e-06	-3.16878	-13.9781	-17.9149	-22.4693	-10.9724	-10.9837	-23.5088	-19.0423	-17.9456	-10.2745	-19.199	-16.0672	-16.4744	-20.1596	-14.4827	-18.6954	-15.3463	-16.4917	-17.2168	-15.3795	-13.0401	-13.0932	-17.3945	-17.1299	-10.7438	-10.2988	-11.7471	-13.7203	-12.4469	-13.1968	-16.1007	-14.8555	-14.4597	-15.561	-17.2089	-17.1458
Gm26642	1	135248561	135266443	+	Gm26642	ENSMUSG00000097680	predicted gene, 26642 [Source:MGI Symbol;Acc:MGI:5477136]	+	gene	Name match	0	0.000536239	0.00274272	-2.40408	-12.8286	-14.509	-23.3902	-16.0452	-24.6334	-24.4296	-15.2876	-18.8664	-15.5952	-20.1199	-16.988	-17.3952	-21.0804	-15.4035	-19.6162	-16.2671	-17.4125	-18.1376	-16.3003	-13.9609	-14.014	-18.3153	-18.0507	-11.6647	-11.2196	-7.93098	-14.6411	-13.3677	-14.1176	-17.0215	-15.7763	-15.3805	-16.4818	-18.1298	-18.0666
Rnpep	1	135262712	135284084	-	Rnpep	ENSMUSG00000041926	arginyl aminopeptidase (aminopeptidase B) [Source:MGI Symbol;Acc:MGI:2384902]	-	gene	Name match	0	0.00288897	0.0130022	-1.89774	-11.0186	-14.7662	-23.6474	-16.3024	-20.9313	-24.6868	-13.783	-19.1236	-15.8524	-20.3771	-17.2452	-17.6524	-21.3376	-15.6607	-19.8734	-16.5243	-17.6697	-18.3948	-16.5575	-14.2181	-14.2712	-18.5725	-18.3079	-11.9219	-11.4768	-8.18818	-14.8983	-13.6249	-14.3748	-17.2787	-16.0335	-15.6377	-10.2651	-18.387	-18.3238
Timm17a	1	135295213	135313778	-	Timm17a	ENSMUSG00000062580	translocase of inner mitochondrial membrane 17a [Source:MGI Symbol;Acc:MGI:1343131]	-	gene	Name match	0	1.359e-11	1.99292e-10	-3.71519	-10.8571	-12.4827	-15.0731	-16.0993	-8.13502	-24.4836	-20.0172	-18.9205	-15.6493	-20.1739	-10.9832	-17.4493	-21.1345	-15.4576	-19.6703	-16.3212	-17.4666	-18.1917	-16.3544	-14.015	-14.0681	-18.3694	-18.1048	-11.7187	-11.2737	-12.722	-14.6952	-13.4218	-14.1717	-17.0755	-15.8304	-15.4346	-16.5359	-18.1838	-18.1207
Ipo9	1	135382312	135430499	-	Ipo9	ENSMUSG00000041879	importin 9 [Source:MGI Symbol;Acc:MGI:1918944]	-	gene	Name match	0	2.79378e-05	0.000172183	-4.52668	-11.1353	-16.9535	-14.1764	-17.4753	-22.9115	-20.5784	-21.3932	-20.2965	-17.0253	-21.5499	-18.4181	-18.8253	-22.5105	-9.22213	-13.7446	-17.6972	-18.8426	-13.8307	-17.7304	-10.5951	-15.4441	-14.8385	-19.4808	-13.0947	-12.6497	-14.098	-16.0712	-14.7978	-15.5477	-18.4516	-17.2064	-11.3366	-17.9119	-19.5598	-19.4967
Nav1	1	135434580	135688105	-	Nav1	ENSMUSG00000009418	neuron navigator 1 [Source:MGI Symbol;Acc:MGI:2183683]	-	gene	Name match	0	8.40779e-45	3.27624e-42	-8.81254	-11.4908	-16.3143	-18.8987	-12.8985	-19.4243	-21.7632	-20.4667	-22.6919	-19.4207	-23.9453	-16.0765	-14.8019	-21.584	-12.9684	-23.4417	-20.0926	-21.238	-21.9631	-20.1258	-14.4644	-11.9326	-22.1408	-21.8762	-15.4901	-15.0451	-10.7868	-18.4666	-17.1932	-17.9431	-16.11	-14.0575	-12.469	-20.3073	-21.9552	-21.8921
Csrp1	1	135720061	135752232	+	Csrp1	ENSMUSG00000026421	cysteine and glycine-rich protein 1 [Source:MGI Symbol;Acc:MGI:88549]	+	gene	Name match	0	0.0104429	0.0429682	-3.90753	-9.7238	-14.6621	-16.1487	-8.49251	-21.0807	-25.2768	-15.2321	-19.7136	-16.4425	-20.9671	-17.8352	-18.2425	-15.5277	-16.2507	-20.4635	-17.1143	-18.2597	-18.9848	-17.1475	-9.37069	-14.8613	-19.1625	-18.898	-12.5119	-12.0668	-13.5152	-15.4883	-14.2149	-14.9648	-17.8687	-9.71665	-16.2277	-17.3291	-18.977	-18.9138
Tnnt2	1	135836354	135852260	+	Tnnt2	ENSMUSG00000026414	troponin T2, cardiac [Source:MGI Symbol;Acc:MGI:104597]	+	gene	Name match	0	3.45706e-06	2.43934e-05	9.16998	-6.07074	-16.5737	-13.0317	-15.8763	-5.49843	-5.67611	-19.7942	-18.6975	-15.4263	-11.6492	-8.37244	-17.2263	-8.45343	-15.2346	-11.7407	-16.0982	-17.2436	-17.9687	-7.75056	-2.14359	-13.8451	-18.1464	-17.8818	-11.4957	-11.0507	-12.499	-14.4722	-1.25848	-13.9487	-16.8525	-6.293	-15.2116	-16.3129	-17.9608	-17.8977
Tmem9	1	136008150	136035342	+	Tmem9	ENSMUSG00000026411	transmembrane protein 9 [Source:MGI Symbol;Acc:MGI:1913491]	+	gene	Name match	0	0.00357282	0.0158554	-1.7174	-11.3743	-19.0254	-23.9948	-16.6499	-19.0637	-20.6343	-20.5678	-19.4711	-16.1999	-20.7245	-17.5926	-17.9999	-21.6851	-16.0081	-15.3685	-16.8717	-18.0172	-18.7422	-16.905	-11.6062	-14.6187	-18.92	-18.6554	-12.2693	-11.8242	-13.2726	-15.2458	-13.9724	-14.7222	-17.6261	-16.381	-11.0782	-17.0865	-18.7344	-18.6713
Camsap2	1	136268123	136346104	-	Camsap2	ENSMUSG00000041570	calmodulin regulated spectrin-associated protein family, member 2 [Source:MGI Symbol;Acc:MGI:1922434]	-	gene	Name match	0	4.52902e-07	3.58604e-06	-5.3042	-12.6107	-25.0192	-14.7862	-12.2629	-22.9055	-23.2322	-22.0877	-20.991	-17.7198	-22.2444	-14.1026	-15.3678	-23.205	-17.528	-21.7408	-18.3916	-19.5371	-20.2621	-18.4249	-10.5072	-11.2862	-20.4399	-20.1753	-13.7892	-13.3441	-14.7925	-16.7657	-15.4923	-16.2421	-19.146	-17.9009	-17.505	-18.6064	-20.2543	-20.1912
Ddx59	1	136415271	136440158	+	Ddx59	ENSMUSG00000026404	DEAD (Asp-Glu-Ala-Asp) box polypeptide 59 [Source:MGI Symbol;Acc:MGI:1915247]	+	gene	Name match	0	0.00217395	0.00998363	-1.99806	-12.431	-23.3715	-12.727	-16.5221	-25.1103	-24.9064	-20.44	-19.3433	-16.0721	-20.5967	-12.8534	-17.8721	-13.1861	-15.8803	-20.0931	-16.7439	-17.8894	-18.6145	-16.7772	-14.4377	-10.5315	-18.7922	-18.5276	-12.1415	-11.6964	-13.1448	-15.118	-13.8446	-14.5944	-17.4983	-16.2532	-15.8573	-16.9587	-18.6066	-13.3471
Zfp281	1	136624901	136630053	+	Zfp281	ENSMUSG00000041483	zinc finger protein 281 [Source:MGI Symbol;Acc:MGI:3029290]	+	gene	Name match	0	0.00059713	0.0030313	-5.84224	-10.159	-16.6256	-21.5951	-14.2501	-22.8383	-22.6345	-18.1681	-17.0713	-13.8001	-18.3248	-15.1929	-11.0558	-19.2853	-13.6084	-17.8211	-14.472	-15.6174	-16.3425	-14.5052	-12.1658	-6.97947	-16.5202	-16.2556	-9.86955	-9.42447	-10.8728	-12.846	-11.5726	-12.3225	-15.2264	-13.9812	-13.5854	-14.6867	-16.3347	-16.2715
Nek7	1	138482875	138620141	-	Nek7	ENSMUSG00000026393	NIMA (never in mitosis gene a)-related expressed kinase 7 [Source:MGI Symbol;Acc:MGI:1890645]	-	gene	Name match	0	2.69277e-21	1.21986e-19	-8.05267	-11.7797	-8.73455	-10.1464	-18.9855	-27.5737	-27.3699	-22.9035	-21.8067	-11.6287	-17.7383	-15.0214	-14.6917	-24.0207	-18.3438	-22.5566	-19.2074	-20.3528	-15.604	-13.4162	-16.9012	-16.9544	-21.2557	-20.9911	-14.605	-14.1599	-15.6083	-17.5814	-16.308	-17.0579	-19.9618	-13.4772	-18.3208	-19.4222	-21.0701	-21.007
2310009B15Rik	1	138851983	138856852	-	2310009B15Rik	ENSMUSG00000079283	RIKEN cDNA 2310009B15 gene [Source:MGI Symbol;Acc:MGI:1916799]	-	gene	Name match	0	0.000112489	0.000637719	-5.15958	-16.4963	-21.018	-21.5136	-14.1686	-22.7568	-22.553	-18.0866	-12.8378	-13.7186	-18.2433	-15.1114	-15.5186	-19.2038	-13.5269	-17.7397	-14.3905	-15.5359	-16.261	-14.4237	-12.0843	-12.1374	-16.4387	-16.1741	-9.78806	-9.34298	-10.7914	-12.7645	-11.4911	-12.241	-15.1449	-13.8997	-13.5039	-14.6052	-16.2532	-11.5145
Dennd1b	1	138963435	139178960	+	Dennd1b	ENSMUSG00000056268	DENN/MADD domain containing 1B [Source:MGI Symbol;Acc:MGI:2447812]	+	gene	Name match	0	4.56075e-18	1.50997e-16	-6.36905	-12.1361	-17.5924	-16.7592	-13.1269	-28.2246	-23.4764	-23.5544	-17.0962	-14.7125	-16.8448	-14.1053	-15.4421	-19.8758	-11.9002	-16.8075	-19.8583	-21.0037	-16.1845	-19.8915	-17.5521	-11.499	-21.9065	-21.6419	-15.2559	-14.8108	-10.8977	-18.2323	-16.9589	-12.2349	-20.6127	-14.5151	-15.6498	-15.1137	-21.721	-15.4835
Gm37470	1	139030185	139032982	+	Gm37470	ENSMUSG00000102157	predicted gene, 37470 [Source:MGI Symbol;Acc:MGI:5610698]	+	gene	Name match	0	0.000529155	0.0027102	-7.36607	-15.6968	-20.2185	-20.714	-13.3691	-21.9573	-21.7534	-17.287	-16.1903	-12.9191	-17.4437	-14.3119	-14.7191	-18.4043	-12.7274	-16.9401	-13.591	-14.7364	-15.4615	-13.6242	-11.2848	-11.3379	-15.6392	-15.3746	-8.98853	-8.54346	-9.99183	-11.965	-10.6916	-11.4415	-14.3453	-13.1002	-12.7044	-13.8057	-15.4536	-15.3905
Zbtb41	1	139422288	139453005	+	Zbtb41	ENSMUSG00000033964	zinc finger and BTB domain containing 41 [Source:MGI Symbol;Acc:MGI:2444487]	+	gene	Name match	0	0.000298748	0.00159054	-5.20462	-12.0945	-15.2895	-15.785	-16.8257	-25.4139	-25.2101	-20.7437	-19.6469	-16.3757	-20.9004	-17.7685	-18.1757	-21.8609	-16.184	-15.6009	-17.0476	-18.193	-18.9181	-17.0808	-14.7414	-14.7945	-19.0958	-14.2869	-12.4451	-12.0001	-13.4484	-15.4216	-14.1482	-14.8981	-17.802	-16.5568	-16.161	-17.2623	-14.1144	-18.8471
Gm4788	1	139697623	139781243	-	Gm4788	ENSMUSG00000070594	predicted gene 4788 [Source:MGI Symbol;Acc:MGI:3646434]	-	gene	Name match	0	3.54699e-36	6.50726e-34	-7.86141	-13.4804	-15.1461	-18.5686	-13.7262	-26.8587	-26.6548	-22.1884	-21.0917	-17.8205	-22.3451	-13.7393	-19.6205	-23.3057	-17.6288	-21.8415	-12.6679	-19.6378	-20.3629	-18.5256	-16.1862	-16.2393	-20.5406	-20.276	-13.8899	-13.4449	-14.8932	-16.8664	-15.593	-16.3429	-19.2467	-18.0016	-17.6058	-18.7071	-20.355	-20.2919
Cfhr2	1	139804167	139858702	-	Cfhr2	ENSMUSG00000033898	complement factor H-related 2 [Source:MGI Symbol;Acc:MGI:3611575]	-	gene	Name match	0	1.52545e-41	4.60102e-39	-8.41956	-12.742	-16.1128	-16.881	-17.6538	-26.242	-26.0382	-21.5718	-20.475	-17.2039	-21.7285	-18.5966	-19.0039	-22.689	-12.4007	-21.2249	-17.8757	-19.0211	-19.7462	-13.172	-15.5695	-15.6227	-19.924	-19.6594	-13.2733	-12.8282	-14.2766	-16.2497	-14.9763	-15.7262	-18.6301	-17.3849	-16.9891	-18.0905	-19.7384	-19.6753
Cfh	1	140084708	140183764	-	Cfh	ENSMUSG00000026365	complement component factor h [Source:MGI Symbol;Acc:MGI:88385]	-	gene	Name match	0	8.82293e-25	5.84762e-23	-6.82484	-16.5206	-15.3921	-17.0821	-11.6625	-27.1031	-26.8992	-17.3266	-21.3361	-9.10878	-22.5895	-19.4577	-19.8649	-23.5501	-17.8732	-15.1657	-18.7367	-19.8822	-20.6073	-18.77	-16.4305	-16.4837	-20.785	-20.5204	-14.1343	-13.6892	-15.1376	-17.1108	-15.8374	-16.5873	-19.4911	-18.246	-17.8502	-18.9515	-20.5994	-20.5363
Kcnt2	1	140246158	140612067	+	Kcnt2	ENSMUSG00000052726	potassium channel, subfamily T, member 2 [Source:MGI Symbol;Acc:MGI:3036273]	+	gene	Name match	0	5.15155e-17	1.5004e-15	-5.41279	-12.3349	-17.113	-17.149	-13.9813	-28.9883	-24.1088	-19.6424	-18.8213	-19.9501	-24.4747	-21.3428	-21.7501	-19.9613	-19.7583	-20.0117	-15.0776	-21.7673	-18.1705	-20.6551	-18.3157	-18.3689	-22.6702	-22.4056	-16.0195	-15.5744	-17.0228	-18.9959	-17.7226	-18.4724	-21.3763	-20.1311	-19.7353	-16.6847	-22.4846	-22.4215
Gm37599	1	141356789	141357277	+	Gm37599	ENSMUSG00000102740	predicted gene, 37599 [Source:MGI Symbol;Acc:MGI:5610827]	+	gene	Name match	0	4.77915e-05	0.000284916	-2.55432	-13.1803	-17.702	-18.1975	-10.8526	-19.4408	-19.237	-14.7705	-13.6738	-10.4026	-14.9272	-11.7954	-12.2026	-15.8878	-10.2109	-14.4236	-11.0745	-12.2199	-12.945	-11.1077	-8.76827	-8.82143	-13.1227	-12.8581	-6.47204	-6.02697	-7.47534	-9.44851	-8.17511	-8.92498	-11.8289	-10.5837	-10.1879	-11.2892	-12.9372	-12.874
Cdc73	1	143598800	143702893	-	Cdc73	ENSMUSG00000026361	cell division cycle 73, Paf1/RNA polymerase II complex component [Source:MGI Symbol;Acc:MGI:2384876]	-	gene	Name match	0	0.00414905	0.0181925	-1.83412	-13.1474	-16.6877	-15.7282	-11.7202	-27.1747	-26.9708	-22.5044	-21.4076	-12.3995	-22.6611	-19.5292	-19.9365	-23.6216	-17.9447	-22.1575	-13.1645	-19.9537	-20.6788	-18.8415	-16.5021	-12.0109	-20.8566	-15.0476	-14.2059	-13.7608	-15.2092	-17.1823	-15.9089	-16.6588	-19.5627	-12.1655	-17.9217	-14.7011	-20.671	-20.6079
Glrx2	1	143716338	143749676	+	Glrx2	ENSMUSG00000018196	glutaredoxin 2 (thioltransferase) [Source:MGI Symbol;Acc:MGI:1916617]	+	gene	Name match	0	2.04925e-11	2.93974e-10	-4.29655	-10.6932	-10.9585	-18.0924	-16.9438	-9.628	-20.0469	-14.3004	-14.3276	-16.4939	-15.779	-10.6366	-13.0544	-16.6571	-11.0626	-15.2754	-11.9262	-13.0717	-19.0362	-17.1989	-9.95261	-14.9127	-19.214	-18.9494	-12.5633	-12.1182	-13.5666	-15.5397	-9.02688	-15.0162	-17.9201	-10.5229	-16.2791	-12.141	-19.0284	-13.7258
Ro60	1	143750790	143777068	-	Ro60	ENSMUSG00000018199	Ro60, Y RNA binding protein [Source:MGI Symbol;Acc:MGI:106652]	-	gene	Name match	0	4.20632e-12	6.57475e-11	-7.76501	-11.8337	-19.8385	-14.5623	-16.6005	-21.0367	-24.9849	-16.5591	-19.4217	-11.2981	-20.6752	-17.5433	-17.9506	-21.6357	-15.9588	-20.1716	-16.8224	-17.9678	-18.6929	-16.8556	-14.5162	-14.5694	-18.8707	-18.6061	-12.22	-11.7749	-13.2233	-15.1964	-13.923	-14.6729	-17.5768	-16.3316	-15.9358	-17.0372	-18.6851	-18.622
Uchl5	1	143777272	143807466	+	Uchl5	ENSMUSG00000018189	ubiquitin carboxyl-terminal esterase L5 [Source:MGI Symbol;Acc:MGI:1914848]	+	gene	Name match	0	0.0101446	0.0417793	-3.49365	-11.2351	-23.6504	-24.1459	-10.479	-25.3891	-25.1853	-20.7189	-19.6221	-16.351	-20.8756	-17.7437	-18.151	-21.8361	-16.1592	-20.372	-11.7009	-18.1682	-18.8933	-17.056	-14.7166	-14.7698	-19.0711	-13.7965	-12.4204	-11.9753	-13.4237	-15.3968	-14.1234	-14.8733	-17.7772	-16.532	-16.1362	-17.2376	-18.8855	-18.8224
Rgs2	1	143999338	144004161	-	Rgs2	ENSMUSG00000026360	regulator of G-protein signaling 2 [Source:MGI Symbol;Acc:MGI:1098271]	-	gene	Name match	0	0.0010975	0.00531504	-7.04996	-12.0087	-21.0043	-21.4999	-14.1549	-22.7431	-22.5393	-18.0729	-16.9761	-13.705	-18.2296	-15.0977	-15.505	-19.1901	-13.5132	-17.726	-14.3768	-15.5222	-16.2473	-14.41	-12.0706	-12.1238	-16.425	-16.1604	-9.77437	-9.32929	-10.7777	-12.7508	-11.4774	-12.2273	-15.1312	-13.886	-13.4902	-14.5916	-16.2395	-16.1763
Pla2g4a	1	149829618	149961290	-	Pla2g4a	ENSMUSG00000056220	phospholipase A2, group IVA (cytosolic, calcium-dependent) [Source:MGI Symbol;Acc:MGI:1195256]	-	gene	Name match	0	7.31177e-14	1.41971e-12	-8.42528	-12.8112	-17.3845	-16.418	-8.93589	-27.5137	-27.3099	-18.991	-21.7467	-12.3928	-17.8482	-19.8683	-20.2755	-19.2852	-18.2838	-16.7596	-19.1474	-20.2928	-21.0179	-19.1806	-16.8412	-16.8943	-21.1956	-20.931	-14.545	-14.0999	-15.5482	-17.5214	-16.248	-16.9979	-15.5798	-18.6566	-13.3539	-19.3621	-21.0101	-20.9469
Odr4	1	150361305	150393080	-	Odr4	ENSMUSG00000006010	odr4 GPCR localization factor homolog [Source:MGI Symbol;Acc:MGI:2385108]	-	gene	Name match	0	1.70782e-13	3.14938e-12	-5.76772	-12.2558	-23.724	-24.2195	-16.8746	-10.7485	-25.2589	-20.7925	-19.6958	-16.4246	-20.9492	-11.6209	-18.2246	-21.9098	-11.6885	-20.4456	-17.0964	-18.2419	-18.9669	-17.1297	-5.57213	-14.8434	-19.1447	-18.8801	-12.494	-12.0489	-13.4973	-15.4705	-14.1971	-14.9469	-17.8508	-16.6057	-11.3029	-17.3112	-14.5592	-18.896
Tpr	1	150392838	150449935	+	Tpr	ENSMUSG00000006005	translocated promoter region, nuclear basket protein [Source:MGI Symbol;Acc:MGI:1922066]	+	gene	Name match	0	4.79582e-26	3.50988e-24	-7.37821	-10.5897	-15.2934	-25.065	-11.6373	-26.3083	-26.1044	-21.638	-20.5413	-12.0737	-18.1833	-18.6628	-19.0701	-22.7553	-17.0783	-21.2911	-17.9419	-19.0874	-15.4125	-17.9752	-15.6357	-11.0775	-19.9902	-19.7256	-13.3395	-12.8944	-14.3428	-16.316	-15.0426	-15.7924	-12.9897	-14.2992	-17.0553	-18.1567	-15.3307	-14.5895
Prg4	1	150449412	150466165	-	Prg4	ENSMUSG00000006014	proteoglycan 4 (megakaryocyte stimulating factor, articular superficial zone protein) [Source:MGI Symbol;Acc:MGI:1891344]	-	gene	Name match	0	1.81623e-05	0.00011537	-3.10367	-10.232	-22.8006	-23.2961	-11.2756	-24.5393	-24.3355	-19.8691	-18.7723	-6.77551	-15.3502	-16.8939	-17.3012	-20.9863	-15.3094	-19.5222	-11.6991	-17.3184	-18.0435	-16.2062	-13.8668	-13.92	-18.2212	-17.9566	-11.5706	-11.1255	-12.5739	-14.547	-13.2736	-14.0235	-16.9274	-15.6822	-15.2864	-16.3878	-18.0357	-17.9725
Ivns1abp	1	151344477	151364422	+	Ivns1abp	ENSMUSG00000023150	influenza virus NS1A binding protein [Source:MGI Symbol;Acc:MGI:2152389]	+	gene	Name match	0	6.09475e-14	1.19664e-12	-4.66238	-10.7859	-23.0521	-23.5477	-16.2027	-8.20185	-24.5871	-20.1207	-19.0239	-8.69386	-20.2774	-17.1455	-17.5528	-16.9985	-15.561	-19.7738	-11.1027	-17.57	-18.2951	-16.4578	-14.1184	-8.56012	-18.4728	-14.2489	-11.8222	-11.3771	-12.8255	-14.7986	-13.5252	-14.2751	-17.179	-15.9338	-15.538	-16.6394	-18.2873	-18.2241
Swt1	1	151367699	151428455	-	Swt1	ENSMUSG00000052748	SWT1 RNA endoribonuclease homolog (S. cerevisiae) [Source:MGI Symbol;Acc:MGI:1914125]	-	gene	Name match	0	1.09974e-16	3.09168e-15	-5.57056	-10.4598	-24.6591	-10.4652	-17.8097	-22.339	-20.9976	-16.6687	-15.4789	-17.3597	-21.8843	-15.4305	-19.1597	-22.8449	-10.3294	-21.3807	-18.0315	-19.177	-19.9021	-9.68395	-10.4034	-15.7785	-20.0798	-19.8152	-13.4291	-12.984	-14.4324	-16.4056	-15.1322	-15.8821	-12.191	-13.6883	-11.8637	-18.2463	-19.8942	-19.8311
Rnf2	1	151458004	151500955	-	Rnf2	ENSMUSG00000026484	ring finger protein 2 [Source:MGI Symbol;Acc:MGI:1101759]	-	gene	Name match	0	2.0377e-07	1.70564e-06	-7.41925	-12.3557	-24.1588	-15.9249	-17.3094	-25.8976	-25.6937	-21.2273	-15.455	-11.0635	-21.384	-18.2521	-18.6594	-22.3446	-12.3457	-20.8804	-17.5312	-18.6767	-19.4017	-17.5644	-15.225	-15.2782	-19.5795	-19.3149	-12.9288	-12.4837	-13.9321	-15.9053	-14.6319	-15.3817	-18.2856	-17.0405	-16.6446	-17.746	-19.3939	-19.3308
Fam129a	1	151571186	151721939	+	Fam129a	ENSMUSG00000026483	family with sequence similarity 129, member A [Source:MGI Symbol;Acc:MGI:2137237]	+	gene	Name match	0	1.00175e-22	5.24311e-21	-7.3577	-12.162	-16.5942	-16.428	-15.0619	-23.8565	-27.5051	-16.6772	-17.9826	-18.6708	-23.1954	-14.8241	-20.4708	-18.3315	-9.49729	-16.8393	-12.2481	-16.4292	-16.8912	-19.3758	-11.212	-12.7676	-21.3909	-21.1263	-14.7402	-14.2951	-15.7435	-17.7167	-16.4433	-17.1931	-20.097	-18.8519	-12.0561	-14.3179	-15.8438	-21.1422
2810414N06Rik	1	151748949	151755018	-	2810414N06Rik	ENSMUSG00000100594	RIKEN cDNA 2810414N06 gene [Source:MGI Symbol;Acc:MGI:1919065]	-	gene	Name match	0	0.00215074	0.00988468	-6.30603	-16.8141	-21.3358	-21.8313	-14.4864	-23.0746	-22.8707	-18.4043	-17.3076	-14.0364	-18.561	-15.4292	-15.8364	-19.5216	-13.8447	-11.1775	-14.7083	-15.8537	-16.5788	-14.7415	-12.4021	-12.4552	-16.7565	-16.4919	-10.1058	-9.66076	-11.1091	-13.0823	-11.8089	-12.5588	-15.4626	-14.2175	-13.8217	-14.923	-16.5709	-16.5078
Edem3	1	151755371	151822051	+	Edem3	ENSMUSG00000043019	ER degradation enhancer, mannosidase alpha- like 3 [Source:MGI Symbol;Acc:MGI:1914217]	+	gene	Name match	0	0.0005662	0.00288788	-4.33591	-11.762	-17.6526	-17.9177	-13.622	-26.5321	-26.3283	-21.8618	-20.7651	-12.5346	-22.0185	-18.8867	-15.972	-22.9791	-13.2433	-16.3629	-13.5543	-19.3112	-20.0363	-18.199	-15.8596	-15.9127	-20.214	-15.5495	-13.5633	-13.1183	-9.65974	-16.5398	-15.2664	-10.7768	-18.9202	-17.675	-12.6036	-18.3805	-20.0284	-19.9653
Tsen15	1	152370735	152386688	-	Tsen15	ENSMUSG00000014980	tRNA splicing endonuclease subunit 15 [Source:MGI Symbol;Acc:MGI:1913887]	-	gene	Name match	0	4.37501e-07	3.47958e-06	-8.17258	-18.2082	-22.73	-23.2255	-15.8806	-24.4688	-24.2649	-19.7985	-18.7018	-15.4306	-19.9552	-16.8233	-17.2306	-20.9157	-15.2388	-19.4516	-16.1024	-17.2478	-17.9729	-16.1356	-13.7962	-13.8494	-18.1507	-17.8861	-11.5	-11.0549	-12.5033	-14.4764	-13.2031	-13.9529	-16.8568	-15.6116	-15.2158	-16.3172	-17.9651	-17.902
Colgalt2	1	152399830	152510695	+	Colgalt2	ENSMUSG00000032649	collagen beta(1-O)galactosyltransferase 2 [Source:MGI Symbol;Acc:MGI:2138232]	+	gene	Name match	0	0.00414097	0.0181705	-5.89596	-12.2383	-17.0756	-15.8988	-11.8111	-27.2656	-27.0617	-17.3559	-21.4986	-18.2274	-18.3521	-19.6202	-20.0274	-17.5382	-18.0356	-16.8485	-18.8992	-20.0447	-20.7698	-18.9325	-16.593	-16.6462	-15.8886	-20.6829	-14.2968	-13.8517	-15.3001	-17.2733	-15.9999	-16.7497	-19.6536	-18.4085	-12.8162	-19.114	-20.7619	-16.1545
Rgl1	1	152516760	152766351	-	Rgl1	ENSMUSG00000026482	ral guanine nucleotide dissociation stimulator,-like 1 [Source:MGI Symbol;Acc:MGI:107484]	-	gene	Name match	0	0.00951152	0.0393156	-1.51886	-11.5965	-16.3669	-12.5406	-15.1726	-28.4363	-22.7951	-17.4643	-17.8735	-19.3982	-18.6833	-14.2126	-21.1982	-24.8833	-19.2064	-23.4192	-20.07	-21.2154	-21.9405	-15.1963	-17.7638	-13.343	-22.1182	-21.8536	-15.4676	-15.0225	-16.4709	-18.444	-17.1706	-17.9205	-15.628	-14.5692	-19.1834	-14.8473	-21.9327	-17.5476
Smg7	1	152836995	152902646	-	Smg7	ENSMUSG00000042772	Smg-7 homolog, nonsense mediated mRNA decay factor (C. elegans) [Source:MGI Symbol;Acc:MGI:2682334]	-	gene	Name match	0	6.16673e-17	1.7815e-15	-5.14953	-12.0044	-24.7709	-15.8406	-17.9215	-26.5097	-26.3058	-17.0435	-20.7427	-17.4715	-16.4178	-11.8921	-15.6601	-18.2197	-17.2797	-21.4925	-18.1433	-13.8148	-20.0138	-18.1766	-15.8371	-10.346	-20.1916	-19.927	-13.5409	-13.0958	-14.5442	-16.5174	-15.244	-15.9938	-18.8977	-17.6526	-11.9348	-18.3581	-14.9471	-19.9429
Nmnat2	1	152954993	153119261	+	Nmnat2	ENSMUSG00000042751	nicotinamide nucleotide adenylyltransferase 2 [Source:MGI Symbol;Acc:MGI:2444155]	+	gene	Name match	0	0.0024832	0.0112931	-5.6299	-12.2782	-19.4991	-17.2802	-11.6664	-27.8328	-20.5821	-16.7817	-16.1325	-18.7946	-16.038	-13.5118	-15.2332	-17.9985	-12.3011	-15.8435	-14.2701	-13.7457	-21.337	-19.4997	-12.3644	-17.2134	-21.5147	-21.2501	-14.8641	-14.419	-15.8673	-17.8405	-16.5671	-11.7056	-20.2209	-12.2691	-13.3404	-14.4	-16.0072	-16.0266
Lamc2	1	153122756	153186447	-	Lamc2	ENSMUSG00000026479	laminin, gamma 2 [Source:MGI Symbol;Acc:MGI:99913]	-	gene	Name match	0	4.39064e-07	3.48889e-06	-8.37288	-11.4498	-15.6895	-25.2227	-13.4778	-26.4659	-26.2621	-18.4738	-20.6989	-17.4278	-16.0999	-18.8205	-19.2278	-22.9129	-17.236	-21.4488	-18.0996	-19.245	-19.9701	-11.8109	-15.7934	-15.8466	-20.1479	-19.8833	-13.4972	-13.0521	-14.5005	-16.4736	-15.2002	-15.9501	-18.854	-17.6088	-17.213	-18.3144	-19.9623	-19.8992
Lamc1	1	153218922	153332786	-	Lamc1	ENSMUSG00000026478	laminin, gamma 1 [Source:MGI Symbol;Acc:MGI:99914]	-	gene	Name match	0	0	0	-12.0188	-12.368	-18.7694	-26.0608	-13.92	-20.3192	-27.1002	-15.4265	-21.5371	-18.2659	-17.6843	-14.4623	-15.3903	-23.7511	-10.9796	-17.6755	-11.9278	-20.0832	-20.8083	-18.971	-16.6315	-11.6258	-20.986	-20.7214	-14.3353	-13.8902	-15.3386	-17.3118	-16.0384	-16.7883	-19.6921	-18.447	-18.0511	-13.7526	-16.7415	-14.0617
Gm38009	1	153283850	153287190	-	Gm38009	ENSMUSG00000103818	predicted gene, 38009 [Source:MGI Symbol;Acc:MGI:5611237]	-	gene	Name match	0	0.0111372	0.0455618	-5.23237	-15.9526	-20.4744	-20.9699	-13.625	-17.6018	-22.0093	-17.5429	-16.4462	-13.175	-17.6996	-14.5678	-14.975	-18.6602	-12.9832	-17.196	-13.8468	-14.9923	-15.7174	-13.8801	-11.5406	-11.5938	-15.8951	-15.6305	-9.24442	-8.79934	-10.2477	-12.2209	-10.9475	-11.6974	-14.6012	-13.3561	-12.9602	-14.0616	-15.7095	-15.6464
Dhx9	1	153455758	153487660	-	Dhx9	ENSMUSG00000042699	DEAH (Asp-Glu-Ala-His) box polypeptide 9 [Source:MGI Symbol;Acc:MGI:108177]	-	gene	Name match	0	3.03288e-10	3.69795e-09	-5.6197	-11.0673	-23.7297	-17.1307	-16.8803	-25.4685	-25.2647	-20.7983	-19.7015	-16.4303	-20.955	-17.8231	-18.2303	-21.9155	-16.2386	-20.4514	-11.4583	-18.2476	-18.9727	-17.1354	-14.796	-14.8491	-19.1504	-18.8858	-12.4998	-12.0547	-13.503	-15.4762	-14.2028	-14.9527	-17.8566	-16.6114	-11.8157	-17.3169	-18.9649	-18.9017
Teddm2	1	153849542	153900228	-	Teddm2	ENSMUSG00000045968	transmembrane epididymal family member 2 [Source:MGI Symbol;Acc:MGI:1923273]	-	gene	Name match	0	1.03963e-05	6.87411e-05	-4.28092	-11.5998	-14.2067	-17.973	-12.8113	-26.1365	-25.9326	-21.4662	-20.3694	-17.0983	-21.6229	-18.491	-18.8983	-22.5834	-16.9065	-21.1193	-17.7701	-18.9155	-19.6406	-17.8033	-15.4639	-15.5171	-19.8184	-19.5538	-13.1677	-12.7226	-14.171	-16.1441	-14.8708	-15.6206	-14.9131	-17.2793	-16.8835	-17.9849	-19.6328	-19.5697
Glul	1	153899944	153909723	+	Glul	ENSMUSG00000026473	glutamate-ammonia ligase (glutamine synthetase) [Source:MGI Symbol;Acc:MGI:95739]	+	gene	Name match	0	9.1284e-24	5.42386e-22	-6.11832	-11.9239	-16.4125	-22.5195	-15.1745	-12.7543	-23.5589	-19.0925	-17.9957	-14.7246	-19.2492	-16.1173	-16.5246	-20.2097	-8.40352	-18.7456	-15.3964	-16.5418	-17.2669	-15.4296	-13.0902	-13.1434	-17.4446	-17.18	-10.794	-10.3489	-11.7973	-13.7704	-12.497	-13.2469	-16.1508	-14.9056	-14.5098	-15.6112	-17.2591	-10.1371
Ier5	1	155096361	155099636	-	Ier5	ENSMUSG00000056708	immediate early response 5 [Source:MGI Symbol;Acc:MGI:1337072]	-	gene	Name match	0	2.53302e-07	2.09219e-06	-7.41185	-10.1873	-20.4461	-20.9416	-13.5966	-22.1848	-21.981	-17.5146	-16.4178	-13.1467	-17.6713	-14.5394	-14.9467	-18.6318	-12.9549	-17.1677	-13.8185	-14.9639	-15.689	-13.8517	-11.5123	-11.5655	-15.8668	-15.6022	-9.21607	-8.771	-10.2194	-12.1925	-10.9191	-11.669	-14.5729	-13.3277	-12.9319	-14.0333	-15.6812	-15.6181
Mr1	1	155127277	155146814	-	Mr1	ENSMUSG00000026471	major histocompatibility complex, class I- related [Source:MGI Symbol;Acc:MGI:1195463]	-	gene	Name match	0	5.56134e-13	9.69312e-12	-9.30343	-12.2611	-23.0223	-23.5179	-16.1729	-24.7611	-24.5573	-20.0909	-18.9941	-9.66405	-20.2476	-17.1157	-17.5229	-21.2081	-15.5312	-19.7439	-16.3948	-17.5402	-18.2653	-16.428	-14.0886	-14.1417	-18.443	-18.1784	-11.7923	-11.3473	-12.7956	-14.7688	-13.4954	-14.2453	-17.1492	-15.904	-15.5082	-16.6095	-18.2575	-18.1943
Stx6	1	155158715	155208256	+	Stx6	ENSMUSG00000026470	syntaxin 6 [Source:MGI Symbol;Acc:MGI:1926235]	+	gene	Name match	0	4.26585e-06	2.97698e-05	-3.4065	-11.5929	-24.3647	-16.4698	-17.5153	-26.1035	-25.8996	-21.4332	-20.3365	-13.2129	-21.5899	-13.7825	-18.8653	-22.5505	-16.8735	-21.0863	-12.4152	-18.8826	-19.6077	-12.7604	-10.957	-15.4841	-19.7854	-14.8452	-13.1347	-12.6896	-14.138	-16.1112	-14.8378	-15.5877	-14.0176	-17.2464	-16.8505	-17.9519	-19.5998	-19.5367
Gm5532	1	155520173	155527143	-	Gm5532	ENSMUSG00000073535	predicted gene 5532 [Source:MGI Symbol;Acc:MGI:3646828]	-	gene	Name match	0	0.000175657	0.000969425	9.46994	-12.0037	-21.5355	-13.655	-14.6861	-9.98064	-23.0704	-18.604	-17.5073	-14.2361	-18.7607	-15.6288	-11.9772	-19.7213	-14.0443	-18.2571	-14.9079	-16.0534	-16.7784	-14.9412	-12.6017	-12.6549	-16.9562	-16.6916	-10.3055	-9.86043	-11.3088	-13.282	-12.0086	-12.7584	-15.6623	-14.4172	-14.0213	-15.1227	-16.7706	-16.7075
Cep350	1	155844964	155973255	-	Cep350	ENSMUSG00000033671	centrosomal protein 350 [Source:MGI Symbol;Acc:MGI:1921331]	-	gene	Name match	0	7.81232e-07	5.96158e-06	-6.13595	-11.9088	-21.778	-17.8473	-12.5661	-27.4762	-27.2723	-18.332	-21.7092	-14.8266	-18.0033	-19.8308	-20.238	-23.9232	-18.2463	-16.5257	-19.1098	-20.2553	-20.9804	-19.1431	-16.8036	-11.3125	-21.1581	-20.8935	-14.5074	-14.0624	-15.5107	-17.4839	-16.2105	-12.416	-19.8642	-18.6191	-13.9013	-19.3246	-20.9725	-20.9094
Tor1aip1	1	156004599	156036480	-	Tor1aip1	ENSMUSG00000026466	torsin A interacting protein 1 [Source:MGI Symbol;Acc:MGI:3582693]	-	gene	Name match	0	0.000182738	0.00100663	-2.24733	-11.4477	-17.7694	-6.99688	-10.1127	-25.4676	-25.2637	-15.516	-19.7006	-16.4294	-20.954	-17.8221	-13.1705	-21.9146	-16.2376	-20.4504	-17.1012	-18.2467	-18.9717	-17.1345	-14.795	-9.6518	-14.0433	-18.8849	-12.4988	-12.0537	-6.90715	-15.4753	-5.81147	-14.9517	-17.8556	-16.6105	-9.79585	-17.316	-18.9639	-18.9008
Tor1aip2	1	156035403	156068861	+	Tor1aip2	ENSMUSG00000050565	torsin A interacting protein 2 [Source:MGI Symbol;Acc:MGI:3582695]	+	gene	Name match	0	7.69738e-12	1.1633e-10	-6.70531	-12.7324	-17.602	-17.0976	-16.949	-25.5372	-25.3334	-20.867	-19.7702	-16.4991	-21.0237	-17.8918	-18.299	-21.9842	-16.3073	-20.5201	-17.1709	-18.3163	-19.0414	-17.2041	-14.8647	-14.9178	-19.2191	-18.9545	-12.5685	-12.1234	-13.5718	-15.5449	-14.2715	-15.0214	-17.9253	-16.6801	-16.2843	-17.3856	-19.0336	-18.9704
Gm2000	1	156366040	156366484	+	Gm2000	ENSMUSG00000078193	predicted gene 2000 [Source:MGI Symbol;Acc:MGI:3780170]	+	gene	Name match	0	1.10458e-39	2.89067e-37	-5.19037	-4.49563	-17.566	-18.0615	-10.7166	-3.32976	-19.1009	-14.6345	-13.5378	-10.2666	-14.7912	-11.6594	-12.0666	-15.7518	-10.0748	-14.2876	-10.9384	-12.0839	-12.809	-10.9717	-8.63224	-8.6854	-12.9867	-12.7221	-6.33601	-5.89094	-7.33931	-9.31248	-8.03908	-8.78895	-11.6928	-10.4477	-10.0518	-11.1532	-12.8011	-12.738
Soat1	1	156424525	156474331	-	Soat1	ENSMUSG00000026600	sterol O-acyltransferase 1 [Source:MGI Symbol;Acc:MGI:104665]	-	gene	Name match	0	1.33444e-14	2.83885e-13	-8.25499	-11.3903	-15.9868	-16.4775	-11.513	-26.1112	-22.0549	-21.4409	-20.3442	-17.073	-21.5976	-14.3138	-14.6335	-22.5582	-16.8812	-21.094	-14.1334	-18.8903	-19.6154	-17.7781	-11.7017	-15.4918	-19.7931	-19.5285	-13.1424	-12.6973	-14.1457	-9.07205	-14.8455	-15.5953	-18.4992	-11.6102	-16.8582	-17.9596	-19.6075	-19.5444
Gm10031	1	156524012	156526664	+	Gm10031	ENSMUSG00000101523	predicted pseudogene 10031 [Source:MGI Symbol;Acc:MGI:3704198]	+	gene	Name match	0	2.40702e-10	2.97666e-09	-4.65801	-15.62	-20.1417	-20.6373	-13.2923	-9.0357	-21.6767	-17.2103	-16.1135	-12.8424	-17.367	-14.2351	-14.6424	-12.6837	-12.6506	-16.8634	-8.2329	-14.6596	-10.2785	-13.5474	-11.208	-11.2611	-15.5624	-9.82391	-8.91176	-8.46669	-9.91505	-11.8882	-10.6148	-11.3647	-14.2686	-13.0234	-12.6276	-13.7289	-15.3769	-15.3137
Tor3a	1	156653617	156674356	-	Tor3a	ENSMUSG00000060519	torsin family 3, member A [Source:MGI Symbol;Acc:MGI:1353652]	-	gene	Name match	0	2.23222e-08	2.11972e-07	-8.01187	-10.1679	-16.284	-17.1121	-16.2591	-24.8473	-24.6434	-20.177	-19.0802	-15.8091	-20.3337	-17.2018	-13.8721	-15.9723	-15.6173	-19.8301	-16.4809	-17.6263	-18.3514	-11.9027	-14.1747	-14.2279	-18.5292	-18.2646	-11.8785	-11.4334	-12.8818	-14.8549	-13.5816	-14.3314	-17.2353	-15.9901	-15.5943	-16.6957	-18.3436	-14.5435
Fam20b	1	156678532	156719086	-	Fam20b	ENSMUSG00000033557	family with sequence similarity 20, member B [Source:MGI Symbol;Acc:MGI:2443990]	-	gene	Name match	0	4.98329e-11	6.78501e-10	-5.27626	-11.4953	-17.9016	-24.5714	-13.3741	-21.9623	-18.269	-21.1444	-20.0477	-16.7765	-21.3011	-18.1693	-18.5765	-22.2617	-16.5848	-20.7975	-17.4484	-18.5938	-19.3189	-17.4816	-15.1422	-15.1953	-19.4966	-19.232	-12.8459	-12.4009	-13.8492	-15.8224	-14.549	-15.2989	-12.5913	-16.9576	-16.5618	-10.8529	-13.8371	-19.2479
Ralgps2	1	156804166	156939626	-	Ralgps2	ENSMUSG00000026594	Ral GEF with PH domain and SH3 binding motif 2 [Source:MGI Symbol;Acc:MGI:1925505]	-	gene	Name match	0	0.00262627	0.0119042	4.31264	-11.7455	-17.3555	-9.50393	-18.9664	-27.5546	-21.9893	-18.2729	-21.7876	-18.5165	-23.0411	-19.9092	-15.1201	-18.0167	-12.9248	-15.9097	-13.2289	-16.2748	-21.0588	-14.8996	-16.8821	-16.9353	-21.2365	-20.972	-14.5859	-14.1408	-15.5892	-17.5623	-16.2889	-17.0388	-19.9427	-18.6975	-18.3017	-15.5506	-21.051	-20.9879
Angptl1	1	156838562	156861078	+	Angptl1	ENSMUSG00000033544	angiopoietin-like 1 [Source:MGI Symbol;Acc:MGI:1919963]	+	gene	Name match	0	3.52609e-17	1.04581e-15	-9.32876	-13.8529	-23.2271	-23.7226	-16.3776	-24.9659	-24.762	-20.2956	-19.1989	-15.9277	-20.4523	-17.3204	-13.2537	-21.4128	-15.7359	-19.9487	-16.5995	-13.686	-18.47	-16.6327	-14.2933	-14.3465	-18.6478	-18.3832	-11.9971	-11.552	-13.0004	-14.9735	-13.7001	-14.45	-17.3539	-16.1087	-15.7129	-16.8143	-18.4622	-18.3991
Gm37802	1	156856217	156858859	-	Gm37802	ENSMUSG00000103303	predicted gene, 37802 [Source:MGI Symbol;Acc:MGI:5611030]	-	gene	Name match	0	1.33151e-06	9.8832e-06	-6.75336	-10.7621	-20.1363	-20.6318	-13.2869	-21.8751	-21.6712	-17.2048	-16.1081	-12.8369	-17.3615	-14.2297	-14.6369	-18.3221	-12.6451	-16.8579	-13.5087	-14.6542	-15.3793	-13.542	-11.2025	-11.2557	-15.557	-15.2924	-8.90631	-8.46124	-9.90961	-11.8828	-10.6094	-11.3592	-14.2631	-13.018	-12.6221	-13.7235	-15.3714	-15.3083
Sec16b	1	157506728	157568425	+	Sec16b	ENSMUSG00000026589	SEC16 homolog B (S. cerevisiae) [Source:MGI Symbol;Acc:MGI:2148802]	+	gene	Name match	0	4.7357e-08	4.32064e-07	-4.03699	-11.283	-16.4312	-10.5896	-12.3945	-26.4201	-26.2162	-21.7498	-20.6531	-12.475	-15.646	-18.7746	-19.1819	-22.8671	-12.2832	-17.344	-18.0537	-19.1992	-19.9242	-13.613	-15.7475	-9.56121	-20.102	-19.8374	-13.4513	-13.0062	-14.4546	-16.4278	-15.1544	-15.9042	-13.5686	-11.7671	-17.1671	-13.657	-19.9164	-13.9733
Cop1	1	159232320	159347640	+	Cop1	ENSMUSG00000040782	COP1, E3 ubiquitin ligase [Source:MGI Symbol;Acc:MGI:1347046]	+	gene	Name match	0	8.58863e-08	7.56816e-07	-5.09519	-11.5435	-15.9661	-15.9484	-11.3728	-27.3224	-17.9666	-15.5001	-16.703	-13.3773	-22.8089	-19.677	-12.7825	-17.6401	-18.0925	-13.8495	-11.3446	-20.1015	-20.8266	-18.9893	-16.6499	-10.7961	-15.0194	-20.7397	-14.3536	-13.9086	-15.3569	-17.3301	-10.5124	-16.8066	-19.7105	-18.4653	-11.9402	-19.1708	-15.1122	-20.7556
4930523C07Rik	1	160044382	160080208	+	4930523C07Rik	ENSMUSG00000090394	RIKEN cDNA 4930523C07 gene [Source:MGI Symbol;Acc:MGI:1914897]	+	gene	Name match	0	1.51509e-17	4.67679e-16	-5.77462	-13.3654	-15.5115	-16.0118	-17.0477	-25.6359	-25.432	-20.9656	-14.962	-16.5977	-21.1223	-17.9905	-18.3977	-22.0829	-16.4059	-20.6187	-17.2695	-18.415	-19.1401	-17.3028	-14.9633	-15.0165	-19.3178	-19.0532	-12.6671	-12.222	-13.6704	-15.6436	-14.3702	-15.12	-18.0239	-16.7788	-16.3829	-17.4843	-19.1322	-19.0691
4930562F07Rik	1	160074735	160077985	-	4930562F07Rik	ENSMUSG00000026729	RIKEN cDNA 4930562F07 gene [Source:MGI Symbol;Acc:MGI:1922505]	-	gene	Name match	0	1.26668e-08	1.24159e-07	-3.97113	-15.9132	-20.435	-20.9305	-13.5856	-22.1738	-21.9699	-17.5035	-16.4068	-13.1356	-17.6602	-14.5284	-14.9356	-18.6208	-12.9438	-17.1566	-13.8074	-14.9529	-15.678	-13.8407	-11.5012	-11.5544	-15.8557	-15.5911	-9.20502	-8.75994	-10.2083	-12.1815	-10.9081	-11.658	-14.5618	-13.3167	-12.9208	-14.0222	-15.6701	-15.607
Mrps14	1	160195215	160202170	+	Mrps14	ENSMUSG00000058267	mitochondrial ribosomal protein S14 [Source:MGI Symbol;Acc:MGI:1928141]	+	gene	Name match	0	2.16659e-14	4.4989e-13	-4.20988	-17.0106	-21.5324	-22.0279	-10.0715	-5.87757	-23.0673	-18.6009	-17.5042	-14.233	-18.7576	-15.6257	-16.033	-19.7182	-14.0412	-18.254	-14.9048	-16.0503	-16.7753	-14.938	-12.5986	-12.6518	-16.9531	-16.6885	-10.3024	-9.85732	-11.3057	-13.2789	-12.0055	-12.7553	-15.6592	-14.4141	-14.0182	-15.1196	-16.7675	-16.7044
Cacybp	1	160202367	160212875	-	Cacybp	ENSMUSG00000014226	calcyclin binding protein [Source:MGI Symbol;Acc:MGI:1270839]	-	gene	Name match	0	5.67983e-17	1.64618e-15	-5.09801	-11.206	-16.5162	-22.6232	-15.2783	-7.89186	-23.6626	-19.1962	-18.0995	-14.8283	-19.3529	-16.221	-16.6283	-20.3135	-14.6365	-18.8493	-15.5001	-16.6456	-17.3706	-15.5333	-13.1939	-13.2471	-17.5484	-17.2838	-10.8977	-10.4526	-11.901	-13.8742	-12.6008	-13.3506	-16.2545	-15.0094	-14.6135	-15.7149	-17.3628	-17.2997
Rabgap1l	1	160219174	160793211	-	Rabgap1l	ENSMUSG00000026721	RAB GTPase activating protein 1-like [Source:MGI Symbol;Acc:MGI:1352507]	-	gene	Name match	0	8.97482e-08	7.89283e-07	-7.00981	-11.9012	-17.6025	-17.8375	-12.8262	-22.3984	-24.5272	-17.8849	-19.7189	-14.9559	-17.9063	-14.7112	-13.2171	-19.6475	-13.6561	-16.4189	-14.3382	-15.1565	-16.5471	-14.6136	-12.4735	-13.4742	-16.8459	-23.0552	-16.6691	-16.2241	-17.6724	-12.9237	-18.3722	-14.5778	-22.026	-12.2581	-20.385	-15.2682	-23.1342	-16.5972
Gm38126	1	160755687	160759689	+	Gm38126	ENSMUSG00000104053	predicted gene, 38126 [Source:MGI Symbol;Acc:MGI:5611354]	+	gene	Name match	0	0.000863967	0.00426306	-6.07713	-10.5069	-20.7352	-21.2307	-13.8858	-22.474	-22.2701	-17.8037	-16.707	-13.4358	-12.523	-14.8286	-15.2358	-18.921	-13.244	-17.4568	-14.1076	-15.2531	-15.9782	-14.1409	-11.8014	-11.8546	-16.1559	-15.8913	-9.50522	-9.06014	-10.5085	-12.4817	-11.2083	-11.9582	-14.862	-13.6169	-13.221	-14.3224	-15.9703	-15.9072
Rc3h1	1	160906418	160974978	+	Rc3h1	ENSMUSG00000040423	RING CCCH (C3H) domains 1 [Source:MGI Symbol;Acc:MGI:2685397]	+	gene	Name match	0	7.99289e-11	1.05871e-09	-7.67284	-9.98101	-19.981	-18.6224	-11.7659	-21.3758	-26.3684	-15.7727	-16.3313	-17.534	-22.0587	-18.9268	-19.334	-18.6973	-11.7308	-21.555	-12.0766	-19.3513	-14.7545	-18.2391	-9.66021	-15.9528	-20.2541	-19.9895	-13.6035	-13.1584	-14.6067	-12.521	-15.3065	-16.0564	-18.9603	-17.7151	-17.3193	-18.4206	-20.0686	-15.766
Gas5	1	161034422	161038539	+	Gas5	ENSMUSG00000053332	growth arrest specific 5 [Source:MGI Symbol;Acc:MGI:95659]	+	gene	Name match	0	1.18912e-10	1.53898e-09	-3.54365	-9.99378	-20.7761	-21.2716	-13.9267	-22.5149	-22.311	-17.8446	-16.7479	-13.4767	-18.0013	-14.8694	-15.2767	-11.8326	-13.2849	-17.4977	-14.1485	-15.2939	-11.0597	-14.1817	-11.8423	-11.8955	-16.1968	-15.9322	-9.54608	-9.10101	-10.5494	-9.20061	-11.2492	-11.999	-14.9029	-13.6577	-13.2619	-14.3633	-16.0112	-15.9481
Klhl20	1	161088375	161131511	-	Klhl20	ENSMUSG00000026705	kelch-like 20 [Source:MGI Symbol;Acc:MGI:2444855]	-	gene	Name match	0	8.95605e-09	8.98154e-08	-5.59599	-11.0074	-16.7841	-19.7011	-17.3156	-25.9038	-25.6999	-16.6221	-20.1368	-11.6692	-21.3902	-14.0189	-18.6656	-16.3408	-12.3519	-20.8866	-12.2155	-18.6829	-19.4079	-12.8951	-15.2312	-15.2844	-19.5857	-19.3211	-12.935	-12.4899	-13.9383	-15.9115	-14.6381	-15.3879	-18.2918	-17.0467	-16.6508	-17.7522	-19.4001	-19.337
Prdx6	1	161240112	161251219	-	Prdx6	ENSMUSG00000026701	peroxiredoxin 6 [Source:MGI Symbol;Acc:MGI:894320]	-	gene	Name match	0	4.65896e-10	5.5327e-09	-3.95564	-11.212	-22.2076	-14.3175	-15.3582	-5.79324	-23.7426	-19.2762	-18.1794	-14.9083	-19.4329	-16.301	-16.7083	-20.3934	-14.7165	-18.9293	-15.5801	-16.7255	-17.4506	-15.6133	-9.66245	-13.3271	-17.6283	-17.3637	-10.9777	-10.5326	-11.981	-13.9541	-12.6807	-13.4306	-16.3345	-15.0893	-14.6935	-15.7949	-17.4428	-17.3796
Pigc	1	161969186	161973435	+	Pigc	ENSMUSG00000026698	phosphatidylinositol glycan anchor biosynthesis, class C [Source:MGI Symbol;Acc:MGI:1914542]	+	gene	Name match	0	0.000453868	0.00234825	-5.67784	-9.14782	-20.8216	-21.3171	-13.9722	-22.5604	-22.3565	-17.8901	-16.7934	-13.5222	-18.0468	-14.9149	-15.3222	-19.0074	-13.3304	-17.5432	-14.194	-15.3395	-16.0645	-14.2273	-11.8878	-11.941	-16.2423	-15.9777	-9.5916	-9.14653	-10.5949	-12.5681	-11.2947	-12.0445	-14.9484	-13.7033	-13.3074	-14.4088	-11.9978	-15.9936
Dnm3	1	161982453	162478034	-	Dnm3	ENSMUSG00000040265	dynamin 3 [Source:MGI Symbol;Acc:MGI:1341299]	-	gene	Name match	0	6.18027e-05	0.000363393	-3.41977	-11.732	-9.42173	-16.6496	-12.2763	-21.473	-29.222	-15.9136	-19.6	-13.7763	-16.1905	-14.8736	-14.836	-17.5311	-14.1371	-17.5702	-14.8415	-14.805	-17.0776	-15.1594	-12.6241	-12.4066	-17.9114	-22.8432	-16.4571	-16.012	-17.4604	-13.3989	-18.1602	-10.9965	-13.5798	-12.2469	-12.6286	-15.1223	-15.5705	-13.9094
Dnm3os	1	162217623	162225550	+	Dnm3os	ENSMUSG00000078190	dynamin 3, opposite strand [Source:MGI Symbol;Acc:MGI:3052332]	+	gene	Name match	0	4.82693e-05	0.00028762	-2.57703	-11.1893	-21.7211	-22.2166	-14.8717	-23.4599	-23.256	-18.7896	-17.6929	-14.4217	-18.9463	-15.8144	-16.2217	-19.9069	-14.2299	-18.4427	-15.0935	-16.239	-16.964	-15.1267	-12.7873	-12.8405	-17.1418	-16.8772	-10.4911	-10.046	-11.4944	-13.4676	-12.1942	-12.944	-15.8479	-14.6028	-14.2069	-15.3083	-16.9562	-16.8931
Eef1aknmt	1	162532127	162548551	-	Eef1aknmt	ENSMUSG00000026694	EEF1A lysine and N-terminal methyltransferase [Source:MGI Symbol;Acc:MGI:1918699]	-	gene	Name match	0	1.93609e-09	2.12023e-08	-8.09701	-11.2278	-13.3815	-14.429	-15.9225	-24.5107	-24.3069	-19.8405	-18.7437	-15.4725	-16.3857	-16.8653	-17.2725	-20.9577	-15.2808	-19.4936	-16.1444	-17.2898	-18.0149	-16.1776	-13.8382	-13.8913	-18.1926	-17.928	-11.542	-11.0969	-12.5453	-14.5184	-13.245	-13.9949	-16.8988	-15.6536	-15.2578	-16.3591	-18.0071	-17.9439
Vamp4	1	162570515	162599084	+	Vamp4	ENSMUSG00000026696	vesicle-associated membrane protein 4 [Source:MGI Symbol;Acc:MGI:1858730]	+	gene	Name match	0	6.2396e-14	1.22355e-12	-6.12598	-11.0264	-18.1706	-24.0661	-11.6149	-25.3093	-25.1055	-20.6391	-15.2204	-16.2712	-20.7958	-17.6639	-18.0712	-21.7563	-16.0794	-20.2922	-16.943	-18.0884	-18.8135	-16.9762	-14.6368	-14.69	-18.9912	-18.7266	-12.3406	-11.8955	-13.3439	-15.317	-14.0436	-14.7935	-17.6974	-16.4522	-16.0564	-17.1578	-18.8057	-18.7425
Myoc	1	162639155	162649693	+	Myoc	ENSMUSG00000026697	myocilin [Source:MGI Symbol;Acc:MGI:1202864]	+	gene	Name match	0	6.9579e-15	1.53908e-13	-9.25957	-10.4027	-15.3799	-22.6273	-15.2824	-23.8706	-23.6667	-19.2003	-18.1036	-14.8324	-19.357	-16.2251	-16.6324	-20.3176	-14.6406	-18.8534	-15.5042	-16.6497	-17.3747	-15.5375	-13.198	-13.2512	-17.5525	-17.2879	-10.9018	-10.4567	-11.9051	-13.8783	-12.6049	-13.3547	-16.2586	-15.0135	-14.6176	-15.719	-17.3669	-17.3038
Myocos	1	162647193	162658219	-	Myocos	ENSMUSG00000091060	myocilin opposite strand [Source:MGI Symbol;Acc:MGI:3642786]	-	gene	Name match	0	0.000536275	0.00274272	-4.5192	-10.468	-15.4452	-13.7462	-11.1957	-23.9359	-23.732	-19.2656	-18.1689	-14.8977	-19.4223	-16.2904	-10.8178	-20.3829	-14.7059	-18.9187	-10.2081	-16.715	-17.44	-15.6028	-13.2633	-13.3165	-12.2563	-17.3532	-10.9671	-10.522	-11.9704	-13.9436	-12.6702	-13.42	-16.3239	-15.0788	-14.6829	-15.7843	-17.4322	-17.3691
Prrc2c	1	162670725	162740556	-	Prrc2c	ENSMUSG00000040225	proline-rich coiled-coil 2C [Source:MGI Symbol;Acc:MGI:1913754]	-	gene	Name match	0	4.31743e-37	8.83113e-35	-6.89824	-11.6239	-15.4767	-16.6147	-13.0512	-26.5987	-26.3949	-16.1326	-20.8317	-11.8236	-22.0852	-18.9533	-19.3605	-23.0457	-17.3688	-21.5815	-13.3799	-19.3778	-20.1029	-13.1594	-15.9262	-15.9793	-20.2806	-20.016	-13.63	-13.1849	-14.6332	-16.6064	-15.333	-16.0829	-18.9868	-17.7416	-17.3458	-18.4471	-15.7731	-16.295
Fmo1	1	162829561	162866610	-	Fmo1	ENSMUSG00000040181	flavin containing monooxygenase 1 [Source:MGI Symbol;Acc:MGI:1310002]	-	gene	Name match	0	7.26945e-26	5.24801e-24	-9.8178	-12.4263	-20.4716	-17.4562	-13.6222	-25.6843	-25.4805	-21.014	-16.4434	-16.6461	-21.1707	-18.0389	-14.9722	-18.6574	-16.4544	-20.6671	-17.318	-18.4634	-19.1885	-17.3512	-15.0118	-15.0649	-19.3662	-19.1016	-12.7155	-12.2705	-13.7188	-15.692	-14.4186	-15.1685	-18.0724	-16.8272	-16.4314	-17.5327	-19.1806	-19.1175
Fmo2	1	162874317	162898726	-	Fmo2	ENSMUSG00000040170	flavin containing monooxygenase 2 [Source:MGI Symbol;Acc:MGI:1916776]	-	gene	Name match	0	5.49644e-11	7.45518e-10	-4.50101	-11.0698	-17.668	-23.839	-16.4941	-25.0823	-24.8784	-12.3	-19.3153	-16.0441	-20.5687	-17.4369	-17.8441	-15.8537	-15.8524	-20.0651	-16.716	-17.8614	-18.5865	-16.7492	-10.0098	-14.4629	-18.7642	-18.4996	-12.1135	-11.6685	-13.1168	-15.09	-13.8166	-14.5665	-17.4704	-16.2252	-15.8294	-16.9307	-18.5786	-18.5155
Prrx1	1	163245119	163313710	-	Prrx1	ENSMUSG00000026586	paired related homeobox 1 [Source:MGI Symbol;Acc:MGI:97712]	-	gene	Name match	0	6.253e-17	1.80259e-15	-6.40403	-12.2961	-15.2727	-25.3296	-12.6232	-26.5729	-26.369	-14.868	-15.3685	-17.5347	-22.0593	-18.9274	-13.5103	-23.0199	-17.3429	-21.5557	-12.7691	-19.352	-20.077	-12.8024	-15.9003	-10.3421	-13.3749	-15.6683	-13.6041	-13.159	-10.755	-16.5806	-11.2483	-16.057	-12.2698	-17.7158	-17.3199	-13.0214	-20.0692	-20.0061
Gm26523	1	163301790	163303620	-	Gm26523	ENSMUSG00000096984	predicted gene, 26523 [Source:MGI Symbol;Acc:MGI:5477017]	-	gene	Name match	0	0.00010315	0.00058744	-7.09909	-15.085	-19.6068	-20.1023	-12.7573	-21.3455	-21.1417	-16.6753	-15.5785	-12.3074	-16.832	-13.7001	-14.1074	-17.7925	-12.1156	-16.3284	-12.9792	-14.1246	-14.8497	-13.0124	-10.673	-10.7262	-15.0274	-14.7628	-8.37677	-7.93169	-9.38006	-11.3532	-10.0798	-10.8297	-13.7336	-12.4884	-12.0926	-13.194	-14.8419	-14.7787
Gorab	1	163384908	163403669	-	Gorab	ENSMUSG00000040124	golgin, RAB6-interacting [Source:MGI Symbol;Acc:MGI:2138271]	-	gene	Name match	0	0.000297561	0.00158445	-2.363	-11.3953	-18.1114	-23.4594	-16.1144	-24.7027	-24.4988	-20.0324	-18.9356	-15.6645	-20.1891	-17.0572	-13.853	-21.1496	-15.4727	-19.6855	-16.3363	-17.4817	-18.2068	-16.3695	-14.0301	-14.0833	-18.3846	-18.12	-11.7339	-11.2888	-12.7372	-14.7103	-13.4369	-14.1868	-17.0907	-15.8455	-15.4497	-16.5511	-18.199	-18.1359
Kifap3	1	163779583	163917109	+	Kifap3	ENSMUSG00000026585	kinesin-associated protein 3 [Source:MGI Symbol;Acc:MGI:107566]	+	gene	Name match	0	2.67052e-10	3.2854e-09	-4.92739	-11.9643	-16.2763	-26.3332	-14.3127	-27.5765	-27.3726	-17.8962	-21.8095	-18.5383	-23.0629	-15.6916	-20.3383	-24.0235	-18.3465	-22.5593	-19.2101	-20.3556	-21.0807	-14.6319	-16.9039	-16.9571	-21.2584	-20.9938	-14.6077	-14.1626	-15.611	-17.5842	-16.3108	-17.0606	-19.9645	-18.7194	-18.3235	-19.4249	-21.0728	-21.0097
Blzf1	1	164289800	164307489	-	Blzf1	ENSMUSG00000026577	basic leucine zipper nuclear factor 1 [Source:MGI Symbol;Acc:MGI:1201607]	-	gene	Name match	0	1.04561e-05	6.912e-05	-2.8236	-8.64489	-22.879	-23.3745	-10.52	-24.6178	-24.4139	-19.9475	-18.8508	-15.5796	-20.1042	-16.9723	-17.3796	-21.0648	-15.3878	-19.6006	-16.2514	-17.3969	-18.1219	-16.2847	-13.9452	-13.9984	-18.2997	-18.0351	-11.649	-11.2039	-12.6523	-14.6255	-13.3521	-14.1019	-17.0058	-15.7607	-15.3648	-16.4662	-13.7922	-18.051
Nme7	1	164304121	164437725	+	Nme7	ENSMUSG00000026575	NME/NM23 family member 7 [Source:MGI Symbol;Acc:MGI:2449121]	+	gene	Name match	0	5.18178e-07	4.05864e-06	-5.03493	-10.6515	-25.7959	-20.467	-11.9744	-14.3562	-27.3309	-22.8645	-21.7677	-18.4966	-23.0212	-19.8893	-20.2966	-23.9817	-18.3048	-22.5176	-19.1684	-20.3138	-21.0389	-19.2016	-16.8622	-16.9154	-21.2166	-20.952	-14.566	-14.1209	-15.5693	-12.5324	-16.269	-10.5093	-19.9228	-18.6776	-18.2818	-19.3832	-21.0311	-20.9679
Dpt	1	164796644	164824266	+	Dpt	ENSMUSG00000026574	dermatopontin [Source:MGI Symbol;Acc:MGI:1928392]	+	gene	Name match	0	1.35083e-36	2.6129e-34	-6.80903	-10.8203	-23.5219	-15.627	-16.6725	-25.2607	-25.0568	-20.5904	-19.4937	-16.2225	-20.7471	-17.6153	-18.0225	-21.7077	-16.0308	-20.2435	-16.8944	-18.0398	-18.7649	-16.9276	-14.5882	-14.6413	-18.9426	-18.678	-12.2919	-11.8469	-13.2952	-15.2684	-13.995	-14.7449	-17.6487	-16.4036	-16.0078	-17.1091	-18.757	-18.6939
Sft2d2	1	165174337	165194438	-	Sft2d2	ENSMUSG00000040848	SFT2 domain containing 2 [Source:MGI Symbol;Acc:MGI:1917362]	-	gene	Name match	0	8.01166e-05	0.000462294	-5.95231	-11.9302	-23.0634	-14.0538	-10.892	-19.8428	-19.3589	-20.1319	-19.0352	-10.4421	-20.2886	-11.8348	-12.0901	-21.2492	-9.9608	-16.4631	-11.1545	-17.5813	-12.4819	-16.4691	-14.1296	-14.1828	-18.4841	-18.2195	-11.8334	-11.3883	-12.8367	-14.8099	-13.5365	-7.2036	-17.1902	-10.4711	-15.5492	-16.6506	-11.2885	-18.2354
Tiprl	1	165212286	165236996	-	Tiprl	ENSMUSG00000040843	TIP41, TOR signalling pathway regulator-like (S. cerevisiae) [Source:MGI Symbol;Acc:MGI:1915087]	-	gene	Name match	0	2.15827e-17	6.57663e-16	-8.09257	-11.0436	-17.6242	-19.7978	-16.5118	-17.2269	-24.8961	-20.4297	-19.333	-16.0618	-20.5864	-17.4546	-17.8618	-21.547	-15.87	-20.0828	-16.7336	-17.8791	-18.6042	-16.7669	-14.4274	-14.4806	-10.138	-18.5173	-12.1312	-11.6861	-13.1345	-15.1077	-13.8343	-14.5842	-17.488	-16.2429	-15.847	-16.9484	-18.5963	-18.5332
Dcaf6	1	165328698	165460475	-	Dcaf6	ENSMUSG00000026571	DDB1 and CUL4 associated factor 6 [Source:MGI Symbol;Acc:MGI:1921356]	-	gene	Name match	0	0.000426977	0.00221653	-1.9906	-11.1924	-8.60585	-8.38247	-11.5079	-27.5149	-22.159	-22.8446	-21.7479	-12.8984	-14.1146	-19.8694	-20.2767	-17.2707	-12.963	-22.4977	-19.1485	-20.294	-21.019	-13.5703	-16.8423	-16.8955	-16.5212	-20.9322	-14.5461	-14.101	-15.5494	-17.5226	-16.2492	-16.999	-19.9029	-11.356	-9.98581	-14.5108	-21.0112	-20.9481
Mpc2	1	165460637	165481214	+	Mpc2	ENSMUSG00000026568	mitochondrial pyruvate carrier 2 [Source:MGI Symbol;Acc:MGI:1917706]	+	gene	Name match	0	1.96029e-05	0.000123791	-2.57162	-12.0658	-23.0971	-17.9488	-16.2477	-7.30628	-6.11605	-20.1657	-19.0689	-11.5583	-20.3224	-17.1905	-17.5978	-21.2829	-15.606	-14.3814	-16.4696	-17.615	-18.3401	-16.5028	-14.1634	-14.2166	-18.5178	-18.2532	-11.8672	-11.4221	-12.8705	-14.8436	-13.5702	-5.03367	-17.224	-15.9788	-9.43099	-8.53235	-18.3323	-18.2691
Mpzl1	1	165592240	165634538	-	Mpzl1	ENSMUSG00000026566	myelin protein zero-like 1 [Source:MGI Symbol;Acc:MGI:1915731]	-	gene	Name match	0	4.96443e-09	5.17088e-08	-8.22323	-11.0117	-16.9294	-24.6322	-12.2773	-25.8755	-21.1273	-16.1463	-13.3565	-16.8373	-21.3619	-18.23	-18.6373	-22.3225	-16.6455	-20.8583	-17.5091	-18.6545	-14.2734	-17.5423	-15.2029	-15.2561	-19.5574	-19.2928	-12.9067	-12.4616	-13.91	-15.8832	-14.6098	-15.3596	-18.2635	-17.0184	-11.3006	-17.7239	-19.3718	-19.3087
Creg1	1	165763746	165775308	+	Creg1	ENSMUSG00000040713	cellular repressor of E1A-stimulated genes 1 [Source:MGI Symbol;Acc:MGI:1344382]	+	gene	Name match	0	9.91614e-08	8.68419e-07	-5.47574	-17.7438	-22.2656	-22.7611	-15.4162	-12.1506	-23.8005	-19.3341	-18.2374	-14.9662	-19.4908	-16.3589	-16.7662	-20.4513	-14.7744	-18.9872	-15.638	-16.7834	-17.5085	-15.6712	-13.3318	-13.385	-17.6863	-17.4217	-11.0356	-10.5905	-12.0389	-14.012	-12.7387	-13.4885	-16.3924	-15.1472	-14.7514	-15.8528	-17.5007	-17.4376
Pou2f1	1	165865154	166002678	-	Pou2f1	ENSMUSG00000026565	POU domain, class 2, transcription factor 1 [Source:MGI Symbol;Acc:MGI:101898]	-	gene	Name match	0	3.62258e-06	2.55107e-05	-7.35503	-12.7335	-25.8377	-17.9524	-12.9294	-27.5765	-27.3726	-22.9062	-21.8095	-18.5383	-23.0629	-19.931	-20.3383	-17.7015	-14.3872	-22.5593	-19.2101	-20.3555	-16.6067	-19.2433	-16.9039	-16.9571	-21.2584	-20.9938	-14.6077	-14.1626	-15.611	-17.5842	-16.3108	-17.0606	-19.9645	-11.9526	-13.9236	-19.4249	-15.7509	-21.0097
Ildr2	1	166254139	166316823	+	Ildr2	ENSMUSG00000040612	immunoglobulin-like domain containing receptor 2 [Source:MGI Symbol;Acc:MGI:1196370]	+	gene	Name match	0	0.00945724	0.0391539	-5.36314	-12.3866	-16.2484	-15.2291	-12.8448	-20.3368	-26.2391	-17.2988	-16.0645	-17.4048	-21.9294	-18.7975	-19.2048	-22.8899	-17.213	-21.4258	-18.0766	-19.222	-19.9471	-18.1098	-15.7704	-15.8236	-20.1249	-15.6208	-13.4742	-13.0291	-14.4775	-16.4506	-15.1773	-15.9271	-18.831	-17.5858	-17.19	-18.2914	-19.9393	-19.8762
Tada1	1	166379097	166393621	+	Tada1	ENSMUSG00000026563	transcriptional adaptor 1 [Source:MGI Symbol;Acc:MGI:1196415]	+	gene	Name match	0	0.00217112	0.0099732	-5.10025	-11.0879	-22.5946	-23.0901	-15.7452	-20.7219	-24.1295	-19.6631	-18.5664	-15.2952	-19.8198	-16.6879	-17.0952	-20.7804	-15.1034	-19.3162	-15.967	-17.1125	-17.8375	-16.0003	-13.6608	-13.714	-18.0153	-17.7507	-11.3646	-10.9195	-12.3679	-14.3411	-13.0677	-13.8175	-16.7214	-15.4763	-15.0804	-16.1818	-17.8297	-17.7666
Pogk	1	166384622	166409863	-	Pogk	ENSMUSG00000040596	pogo transposable element with KRAB domain [Source:MGI Symbol;Acc:MGI:1918842]	-	gene	Name match	0	2.44793e-09	2.64896e-08	-7.94782	-11.6096	-15.8648	-23.8874	-16.5425	-21.5192	-24.9268	-20.4604	-19.3637	-16.0925	-20.6171	-17.4852	-17.8925	-21.5777	-15.9007	-20.1135	-10.6123	-17.9098	-18.6348	-16.7975	-14.4581	-14.5113	-18.8126	-18.548	-12.1619	-11.7168	-13.1652	-15.1384	-13.865	-14.6148	-17.5187	-16.2736	-15.8777	-16.9791	-18.627	-18.5639
Fam78b	1	167001417	167091302	+	Fam78b	ENSMUSG00000060568	family with sequence similarity 78, member B [Source:MGI Symbol;Acc:MGI:2443050]	+	gene	Name match	0	0.00945243	0.0391507	-5.30129	-11.6049	-17.4428	-16.1289	-12.1353	-22.4186	-26.7591	-17.6171	-21.1959	-17.9248	-22.4494	-14.5216	-19.7248	-18.936	-13.6741	-21.9458	-18.5966	-19.742	-15.7915	-18.6298	-16.2904	-11.3842	-20.6448	-20.3802	-13.9942	-13.5491	-14.9975	-16.9706	-15.6972	-16.4471	-16.029	-18.1058	-17.71	-18.8113	-20.4593	-16.3372
Tmco1	1	167308378	167333978	+	Tmco1	ENSMUSG00000052428	transmembrane and coiled-coil domains 1 [Source:MGI Symbol;Acc:MGI:1921173]	+	gene	Name match	0	2.89236e-15	6.71068e-14	-4.44524	-11.9571	-17.0314	-15.5366	-11.2409	-8.26238	-19.2716	-20.4808	-19.384	-12.1535	-20.6375	-17.5056	-14.0604	-17.446	-15.9211	-15.9819	-16.7847	-17.9301	-13.0438	-16.8179	-14.4785	-14.5317	-14.6809	-18.5683	-12.1823	-11.7372	-13.1856	-15.1587	-13.8853	-10.8982	-13.0651	-7.82904	-15.8981	-16.9995	-18.6474	-18.5842
Aldh9a1	1	167349991	167368532	+	Aldh9a1	ENSMUSG00000026687	aldehyde dehydrogenase 9, subfamily A1 [Source:MGI Symbol;Acc:MGI:1861622]	+	gene	Name match	0	1.35364e-06	1.00349e-05	-7.16114	-12.0833	-22.9468	-18.4324	-16.0974	-24.6856	-24.4818	-20.0154	-18.9186	-10.5413	-16.5606	-17.0402	-11.01	-15.2527	-15.4557	-13.7616	-16.3193	-11.6689	-14.5784	-16.3525	-14.0131	-14.0662	-18.3675	-18.1029	-11.7169	-11.2718	-12.7202	-9.33187	-13.4199	-14.1698	-17.0737	-10.5472	-10.0712	-10.2323	-18.182	-12.7574
Pbx1	1	168119364	168432270	-	Pbx1	ENSMUSG00000052534	pre B cell leukemia homeobox 1 [Source:MGI Symbol;Acc:MGI:97495]	-	gene	Name match	0	1.00328e-11	1.49405e-10	-8.16222	-11.2297	-17.6381	-17.9536	-12.8424	-28.7625	-23.7062	-20.6183	-17.4512	-15.5723	-18.927	-21.1171	-16.7874	-25.2095	-19.5326	-23.7453	-20.3962	-21.5416	-22.2667	-20.4294	-18.09	-18.1431	-17.9705	-16.7799	-15.7937	-15.3487	-16.797	-18.7702	-17.4968	-18.2467	-21.1505	-13.1684	-19.5096	-20.6109	-15.84	-17.6514
Hsd17b7	1	169949535	169969241	-	Hsd17b7	ENSMUSG00000026675	hydroxysteroid (17-beta) dehydrogenase 7 [Source:MGI Symbol;Acc:MGI:1330808]	-	gene	Name match	0	0.00395148	0.0174142	-3.80125	-13.4541	-23.0348	-23.5303	-16.1853	-24.7735	-24.5697	-20.1033	-19.0065	-15.7354	-20.26	-17.1281	-17.5354	-21.2205	-15.5436	-19.7564	-16.4072	-17.5526	-18.2777	-16.4404	-14.101	-14.1542	-18.4555	-18.1909	-11.8048	-11.3597	-12.8081	-14.7812	-13.5078	-14.2577	-17.1616	-15.9164	-15.5206	-16.622	-12.6584	-18.2068
3110045C21Rik	1	169969409	169972396	+	3110045C21Rik	ENSMUSG00000097503	RIKEN cDNA 3110045C21 gene [Source:MGI Symbol;Acc:MGI:1914553]	+	gene	Name match	0	2.12517e-07	1.77177e-06	-4.73491	-10.6853	-20.3133	-20.8088	-13.4639	-22.0521	-21.8482	-17.3818	-16.2851	-13.0139	-17.5385	-14.4067	-14.8139	-18.4991	-12.8221	-17.0349	-13.6857	-14.8312	-15.5563	-13.719	-11.3795	-11.4327	-15.734	-15.4694	-9.08331	-8.63824	-10.0866	-12.0598	-10.7864	-11.5363	-14.4401	-13.195	-12.7991	-13.9005	-15.5484	-15.4853
Ddr2	1	169972307	170110762	-	Ddr2	ENSMUSG00000026674	discoidin domain receptor family, member 2 [Source:MGI Symbol;Acc:MGI:1345277]	-	gene	Name match	0	1.95019e-39	4.9578e-37	-10.4088	-11.4942	-17.3825	-16.6831	-9.24422	-23.1863	-27.3823	-15.2882	-21.8192	-18.548	-18.5987	-16.3293	-20.348	-24.0332	-18.3562	-17.8321	-12.424	-20.3653	-21.0904	-19.2531	-16.9136	-16.9668	-21.2681	-21.0035	-14.6174	-14.1723	-15.6207	-11.798	-16.3205	-17.0704	-19.9742	-18.7291	-18.3333	-19.4346	-21.0825	-21.0194
Uap1	1	170141938	170174957	-	Uap1	ENSMUSG00000026670	UDP-N-acetylglucosamine pyrophosphorylase 1 [Source:MGI Symbol;Acc:MGI:1334459]	-	gene	Name match	0	1.03646e-25	7.4372e-24	-8.95176	-10.8865	-23.7794	-24.2749	-10.5685	-25.5182	-25.3143	-20.8479	-19.7512	-16.48	-21.0046	-17.8727	-18.28	-21.9652	-9.11386	-20.501	-17.1518	-18.2973	-19.0223	-17.1851	-14.8456	-14.8988	-19.2001	-18.9355	-12.5494	-12.1043	-13.5527	-15.5259	-14.2525	-15.0023	-17.9062	-16.6611	-16.2652	-17.3666	-12.8852	-18.9514
Olfml2b	1	170644532	170682789	+	Olfml2b	ENSMUSG00000038463	olfactomedin-like 2B [Source:MGI Symbol;Acc:MGI:2443310]	+	gene	Name match	0	2.83768e-10	3.47782e-09	-4.24937	-12.6176	-23.9918	-15.5248	-17.1424	-21.5786	-25.5267	-21.0603	-15.6417	-16.6924	-21.217	-18.0852	-18.4924	-22.1776	-11.8892	-16.1691	-17.3643	-18.5097	-13.1055	-17.3975	-15.058	-15.1112	-19.4125	-19.1479	-12.7618	-12.3168	-13.7651	-15.7383	-14.4649	-15.2148	-18.1186	-16.8735	-10.7109	-17.579	-19.2269	-19.1638
Atf6	1	170704674	170867771	-	Atf6	ENSMUSG00000026663	activating transcription factor 6 [Source:MGI Symbol;Acc:MGI:1926157]	-	gene	Name match	0	8.02258e-09	8.10019e-08	-8.479	-12.9879	-17.2209	-16.9495	-13.105	-18.3284	-21.7942	-18.8303	-22.0555	-18.7843	-23.3089	-14.2702	-20.5843	-24.2695	-18.5926	-22.8053	-19.4562	-20.6016	-21.3267	-19.4894	-17.15	-17.2031	-21.5044	-21.2398	-14.8537	-14.4087	-15.857	-17.8302	-16.5568	-17.3067	-14.1278	-18.9654	-18.5696	-19.6709	-21.3188	-21.2557
Dusp12	1	170873498	170885540	-	Dusp12	ENSMUSG00000026659	dual specificity phosphatase 12 [Source:MGI Symbol;Acc:MGI:1890614]	-	gene	Name match	0	0.010953	0.0449008	-4.14813	-10.1911	-18.3649	-22.8198	-15.4748	-24.063	-23.8592	-19.3928	-18.296	-15.0248	-19.5495	-11.9437	-16.8249	-20.51	-14.8331	-13.5719	-15.6967	-16.8421	-17.5672	-15.7299	-13.3905	-13.4436	-17.7449	-17.4803	-11.0943	-10.6492	-12.0976	-14.0707	-12.7973	-13.5472	-16.4511	-15.2059	-14.8101	-15.9114	-17.5594	-17.4962
Sdhc	1	171127165	171150603	-	Sdhc	ENSMUSG00000058076	succinate dehydrogenase complex, subunit C, integral membrane protein [Source:MGI Symbol;Acc:MGI:1913302]	-	gene	Name match	0	0.00619022	0.0264962	-1.79398	-9.87649	-23.285	-23.7805	-16.4355	-7.97645	-17.168	-20.3535	-12.7297	-15.9856	-16.3582	-17.3783	-17.7856	-21.4707	-15.7938	-20.0066	-16.6574	-17.8028	-18.5279	-16.6906	-10.1992	-14.4044	-18.7057	-18.4411	-12.055	-11.6099	-13.0583	-15.0314	-7.74806	-14.5079	-17.4118	-11.6223	-15.7708	-16.8722	-15.1982	-18.457
Ndufs2	1	171234853	171251388	-	Ndufs2	ENSMUSG00000013593	NADH:ubiquinone oxidoreductase core subunit S2 [Source:MGI Symbol;Acc:MGI:2385112]	-	gene	Name match	0	7.08545e-10	8.22768e-09	-3.98805	-11.2375	-22.7817	-13.2004	-15.9322	-14.2717	-5.50194	-14.3059	-18.7534	-10.0449	-14.3954	-11.4011	-17.2823	-20.9674	-15.2905	-19.5033	-16.1541	-17.2995	-18.0246	-16.1873	-13.8479	-8.74906	-18.2024	-17.9378	-11.5517	-11.1066	-12.555	-14.5281	-7.64331	-4.96386	-16.9085	-15.6633	-15.2675	-9.09792	-12.3102	-11.6317
Adamts4	1	171250421	171260637	+	Adamts4	ENSMUSG00000006403	a disintegrin-like and metallopeptidase (reprolysin type) with thrombospondin type 1 motif, 4 [Source:MGI Symbol;Acc:MGI:1339949]	+	gene	Name match	0	6.87334e-06	4.65694e-05	-7.65993	-11.436	-15.2071	-22.5825	-15.2376	-23.8258	-20.3	-19.1555	-18.0588	-14.7876	-19.3122	-16.1804	-16.5876	-20.2728	-14.5959	-18.8086	-15.4595	-16.6049	-12.3706	-15.4927	-13.1533	-13.2064	-17.5077	-17.2431	-10.857	-10.412	-11.8603	-13.8335	-12.5601	-13.31	-16.2139	-14.9687	-14.5729	-15.6742	-17.3221	-17.259
Ppox	1	171275990	171281186	-	Ppox	ENSMUSG00000062729	protoporphyrinogen oxidase [Source:MGI Symbol;Acc:MGI:104968]	-	gene	Name match	0	2.36492e-06	1.70144e-05	-7.13638	-16.59	-21.1118	-21.6073	-14.2624	-22.8506	-22.6467	-18.1803	-17.0836	-13.8124	-18.337	-15.2052	-15.6124	-19.2976	-13.6206	-17.8334	-14.4842	-15.6297	-11.9548	-14.5175	-12.178	-12.2312	-16.5325	-16.2679	-9.88181	-9.43674	-10.8851	-12.8583	-11.5849	-12.3348	-15.2386	-13.9935	-13.5976	-14.699	-16.3469	-16.2838
Usp21	1	171281945	171287991	-	Usp21	ENSMUSG00000053483	ubiquitin specific peptidase 21 [Source:MGI Symbol;Acc:MGI:1353665]	-	gene	Name match	0	6.35914e-08	5.71536e-07	-8.00922	-8.48165	-12.9447	-21.8259	-8.26283	-23.0691	-22.8653	-18.3989	-17.3021	-14.0309	-18.5556	-15.4237	-15.8309	-19.5161	-13.8392	-18.052	-14.7028	-11.6088	-16.5733	-14.736	-12.3966	-12.4497	-16.751	-16.4864	-10.1004	-9.65528	-11.1036	-13.0768	-11.8034	-12.5533	-15.4572	-14.212	-13.8162	-14.9175	-16.5655	-16.5023
Ufc1	1	171288563	171295024	-	Ufc1	ENSMUSG00000062963	ubiquitin-fold modifier conjugating enzyme 1 [Source:MGI Symbol;Acc:MGI:1913405]	-	gene	Name match	0	3.61487e-09	3.8325e-08	-3.56522	-9.16738	-21.4261	-21.9216	-14.5767	-5.91909	-22.961	-18.4946	-17.3979	-14.1267	-18.6513	-15.5195	-15.9267	-19.6119	-13.9349	-18.1477	-14.7985	-15.944	-16.6691	-14.8318	-12.4923	-12.5455	-13.3729	-16.5822	-10.1961	-9.75104	-11.1994	-13.1726	-11.8992	-12.6491	-15.5529	-14.3078	-13.9119	-15.0133	-16.6612	-16.5981
Dedd	1	171329145	171342331	+	Dedd	ENSMUSG00000013973	death effector domain-containing [Source:MGI Symbol;Acc:MGI:1333874]	+	gene	Name match	0	1.34305e-08	1.31345e-07	-5.98068	-11.1232	-22.4552	-11.4367	-10.5958	-24.194	-23.9901	-19.5237	-18.427	-15.1558	-19.6804	-16.5485	-16.9558	-20.6409	-14.964	-19.1768	-11.3537	-16.973	-13.0226	-15.8608	-13.5214	-13.5746	-17.8759	-17.6113	-11.2252	-10.7801	-12.2285	-14.2016	-12.9283	-13.6781	-16.582	-9.35195	-14.941	-16.0424	-17.6903	-17.6272
Nit1	1	171338008	171345646	-	Nit1	ENSMUSG00000013997	nitrilase 1 [Source:MGI Symbol;Acc:MGI:1350916]	-	gene	Name match	0	2.3286e-09	2.52829e-08	-7.25698	-12.6014	-21.6675	-11.5292	-14.8181	-23.4063	-23.2024	-18.736	-17.6393	-14.3681	-18.8927	-15.7609	-16.1681	-19.8533	-14.1763	-18.3891	-15.0399	-16.1854	-12.2349	-15.0732	-12.7337	-12.7869	-17.0882	-16.8236	-10.4375	-9.99245	-11.4408	-13.414	-12.1406	-12.8905	-15.7943	-8.56429	-14.1533	-15.2547	-16.9026	-16.8395
Pfdn2	1	171345670	171359254	+	Pfdn2	ENSMUSG00000006412	prefoldin 2 [Source:MGI Symbol;Acc:MGI:1276111]	+	gene	Name match	0	2.10232e-11	3.0098e-10	-6.90493	-10.4493	-22.4981	-22.9936	-11.4092	-24.2369	-24.033	-12.5319	-18.4699	-15.1987	-19.7233	-16.5914	-16.9987	-20.6838	-15.0069	-19.2197	-15.8705	-17.0159	-17.741	-15.9037	-13.5643	-13.6175	-17.9188	-17.6542	-11.2681	-10.823	-12.2714	-14.2445	-12.9711	-13.721	-16.6249	-15.3797	-14.9839	-16.0853	-17.7332	-17.6701
Klhdc9	1	171358446	171360798	-	Klhdc9	ENSMUSG00000045259	kelch domain containing 9 [Source:MGI Symbol;Acc:MGI:1916124]	-	gene	Name match	0	0.00155028	0.00728786	-4.67419	-8.25047	-19.9686	-20.4641	-13.1192	-21.7074	-21.5036	-10.0025	-11.329	-12.6692	-17.1938	-14.062	-14.4692	-18.1544	-12.4775	-16.6902	-13.3411	-14.4865	-15.2116	-13.3743	-11.0349	-11.088	-15.3893	-15.1247	-8.73864	-8.29356	-9.74193	-11.7151	-10.4417	-11.1916	-14.0955	-12.8503	-12.4545	-13.5558	-15.2037	-15.1406
Usf1	1	171411313	171419142	+	Usf1	ENSMUSG00000026641	upstream transcription factor 1 [Source:MGI Symbol;Acc:MGI:99542]	+	gene	Name match	0	1.02762e-09	1.16403e-08	-9.16749	-17.1814	-21.7031	-22.1987	-14.8537	-23.4419	-19.9161	-18.7717	-17.6749	-14.4037	-18.9284	-15.7965	-16.2037	-19.8889	-14.212	-18.4247	-15.0756	-16.221	-16.9461	-15.1088	-12.7694	-12.8225	-17.1238	-16.8592	-10.4731	-10.0281	-11.4764	-13.4496	-12.1762	-12.9261	-15.83	-14.5848	-14.189	-15.2903	-16.9383	-16.8751
Ncstn	1	172066013	172082795	-	Ncstn	ENSMUSG00000003458	nicastrin [Source:MGI Symbol;Acc:MGI:1891700]	-	gene	Name match	0	9.4738e-22	4.46008e-20	-9.90839	-11.3611	-22.803	-23.2986	-15.9536	-24.5418	-24.338	-19.8716	-18.7748	-15.5037	-20.0283	-16.8964	-13.3443	-20.9888	-15.3119	-19.5247	-16.1755	-17.3209	-18.046	-16.2087	-13.8693	-13.9225	-18.2237	-17.9591	-11.5731	-11.128	-12.5764	-14.5495	-13.2761	-14.026	-16.9299	-15.6847	-10.382	-16.3903	-18.0382	-13.2381
Copa	1	172082529	172122330	+	Copa	ENSMUSG00000026553	coatomer protein complex subunit alpha [Source:MGI Symbol;Acc:MGI:1334462]	+	gene	Name match	0	2.8698e-28	2.5858e-26	-9.52616	-11.6816	-16.6301	-16.4976	-6.88508	-22.3137	-22.1099	-17.3804	-20.0207	-16.7495	-16.0777	-18.1422	-18.5495	-22.2347	-11.3613	-15.5741	-17.4213	-18.5668	-13.2091	-17.4546	-9.91873	-15.1683	-19.4696	-19.205	-12.8189	-12.3738	-13.8222	-15.7954	-9.32558	-15.2718	-18.1757	-16.9306	-11.3383	-12.4397	-19.284	-19.2209
Pex19	1	172126755	172136493	+	Pex19	ENSMUSG00000003464	peroxisomal biogenesis factor 19 [Source:MGI Symbol;Acc:MGI:1334458]	+	gene	Name match	0	6.38274e-10	7.44326e-09	-3.91002	-17.4961	-22.0179	-22.5134	-11.557	-23.7567	-23.5528	-13.6865	-17.9897	-14.7185	-19.2431	-16.1112	-16.5185	-15.5922	-14.5267	-18.7395	-15.3903	-16.5358	-17.2609	-15.4236	-13.0841	-13.1373	-17.4386	-17.174	-10.7879	-10.3428	-11.7912	-13.7644	-12.491	-13.2408	-16.1447	-9.53812	-14.5037	-15.6051	-17.253	-12.394
Dcaf8	1	172148084	172197005	+	Dcaf8	ENSMUSG00000026554	DDB1 and CUL4 associated factor 8 [Source:MGI Symbol;Acc:MGI:91860]	+	gene	Name match	0	5.726e-24	3.52585e-22	-6.97996	-9.87025	-14.9729	-11.6759	-8.79437	-12.1748	-18.6002	-13.6781	-13.1776	-11.4689	-12.7473	-10.128	-12.6951	-14.7221	-8.14878	-13.5852	-13.4795	-12.3549	-12.8081	-10.1408	-8.95699	-8.67008	-13.8873	-19.5026	-13.1165	-12.6715	-8.61028	-10.4174	-9.49769	-8.90969	-18.4734	-11.4615	-8.59823	-9.74831	-10.8297	-12.3221
Pea15a	1	172196728	172206804	-	Pea15a	ENSMUSG00000013698	phosphoprotein enriched in astrocytes 15A [Source:MGI Symbol;Acc:MGI:104799]	-	gene	Name match	0	1.16574e-19	4.51958e-18	-5.06327	-17.5454	-18.4557	-15.3883	-6.03227	-6.466	-17.3626	-15.5242	-18.0389	-14.7677	-19.2923	-7.78447	-16.5677	-20.2529	-14.576	-18.7887	-15.4396	-16.585	-17.3101	-15.4728	-13.1334	-13.1865	-17.4878	-17.2232	-10.8371	-10.3921	-11.8404	-13.8136	-12.5402	-13.2901	-16.1939	-14.9488	-14.553	-15.6543	-17.3022	-17.2391
Atp1a2	1	172271709	172298064	-	Atp1a2	ENSMUSG00000007097	ATPase, Na+/K+ transporting, alpha 2 polypeptide [Source:MGI Symbol;Acc:MGI:88106]	-	gene	Name match	0	1.81205e-14	3.79591e-13	-4.538	-10.0869	-11.4341	-23.9497	-16.6048	-19.041	-24.9891	-20.5227	-19.426	-16.1548	-20.6794	-17.5475	-17.9548	-21.64	-15.963	-20.1758	-16.8266	-17.9721	-12.7638	-12.7078	-14.5204	-14.5736	-18.8749	-18.6103	-12.2242	-11.7791	-13.2275	-15.2007	-13.9273	-14.6771	-17.581	-16.3359	-15.94	-17.0414	-14.8369	-18.6262
Tagln2	1	172500047	172507380	+	Tagln2	ENSMUSG00000026547	transgelin 2 [Source:MGI Symbol;Acc:MGI:1312985]	+	gene	Name match	0	7.48238e-06	5.04558e-05	-2.98528	-10.765	-16.5498	-22.1042	-14.7593	-23.3475	-15.7062	-18.6772	-17.5805	-7.16864	-18.8339	-15.7021	-10.7479	-19.7945	-14.1176	-18.3303	-14.9812	-16.1266	-16.8517	-15.0144	-12.675	-12.7281	-17.0294	-16.7648	-10.3787	-9.93366	-11.382	-13.3552	-12.0818	-12.8317	-15.7355	-14.4904	-14.0946	-15.1959	-16.8438	-16.7807
Dusp23	1	172630764	172632962	-	Dusp23	ENSMUSG00000026544	dual specificity phosphatase 23 [Source:MGI Symbol;Acc:MGI:1915690]	-	gene	Name match	0	0.000152173	0.000846777	-4.47991	-10.8049	-10.4829	-13.2033	-13.0216	-21.6098	-21.4059	-16.9395	-15.8428	-12.5716	-17.0962	-13.9643	-14.3716	-18.0567	-12.3798	-16.5926	-13.2434	-14.3888	-15.1139	-13.2766	-10.9372	-10.9904	-15.2917	-15.0271	-8.64098	-8.19591	-9.64428	-11.6174	-10.3441	-11.0939	-13.9978	-12.7526	-12.3568	-13.4582	-15.1061	-15.043
Aim2	1	173350879	173466040	+	Aim2	ENSMUSG00000037860	absent in melanoma 2 [Source:MGI Symbol;Acc:MGI:2686159]	+	gene	Name match	0	0.00140588	0.00666624	-5.40352	-11.7505	-18.3422	-19.1178	-14.1208	-27.3204	-27.1166	-22.6502	-21.5534	-18.2822	-18.748	-19.675	-20.0822	-23.7674	-18.0905	-22.3033	-18.9541	-20.0995	-20.8246	-18.9873	-12.174	-16.701	-21.0023	-20.7377	-14.3517	-13.9066	-15.3549	-17.3281	-16.0547	-16.8046	-19.7085	-18.4633	-18.0675	-19.1688	-20.8168	-20.7536
Ifi207	1	173723427	173741747	-	Ifi207	ENSMUSG00000073490	interferon activated gene 207 [Source:MGI Symbol;Acc:MGI:2138302]	-	gene	Name match	0	6.07035e-14	1.19299e-12	-7.44844	-13.0463	-22.9295	-23.4251	-16.0801	-24.6683	-24.4645	-19.9981	-18.9013	-15.6302	-20.1548	-17.0229	-17.4302	-21.1153	-15.4384	-19.6512	-16.302	-17.4474	-18.1725	-16.3352	-13.9958	-14.049	-18.3502	-18.0856	-11.6996	-11.2545	-12.7029	-14.676	-13.4026	-14.1525	-17.0564	-15.8112	-15.4154	-16.5168	-18.1647	-18.1015
Ifi204	1	173747293	173766943	-	Ifi204	ENSMUSG00000073489	interferon activated gene 204 [Source:MGI Symbol;Acc:MGI:96429]	-	gene	Name match	0	1.22101e-18	4.32407e-17	-9.64011	-12.713	-14.645	-17.4434	-16.1812	-24.7694	-24.5656	-20.0992	-19.0024	-15.7313	-20.2559	-17.124	-17.5313	-21.2164	-15.5395	-19.7523	-16.4031	-17.5485	-18.2736	-16.4363	-14.0969	-14.1501	-18.4513	-18.1867	-11.8007	-11.3556	-12.804	-14.7771	-13.5037	-14.2536	-17.1575	-15.9123	-15.5165	-16.6179	-18.2658	-18.2026
Mndal	1	173849126	173942491	-	Mndal	ENSMUSG00000090272	myeloid nuclear differentiation antigen like [Source:MGI Symbol;Acc:MGI:3780953]	-	gene	Name match	0	9.66281e-18	3.05154e-16	-8.58243	-13.7472	-17.9772	-18.828	-18.4295	-27.0177	-26.8139	-22.3475	-21.2507	-17.9796	-15.3409	-19.3723	-19.7796	-23.4647	-17.7878	-22.0006	-18.6514	-19.7968	-20.5219	-18.6846	-16.3452	-16.3983	-20.6996	-20.435	-14.049	-13.6039	-15.0523	-17.0254	-15.752	-16.5019	-19.4058	-18.1606	-17.7648	-18.8661	-20.5141	-20.4509
Ifi211	1	173896345	173913046	-	Ifi211	ENSMUSG00000026536	interferon activated gene 211 [Source:MGI Symbol;Acc:MGI:3041120]	-	gene	Name match	0	1.19264e-34	1.89496e-32	-9.53782	-18.2743	-22.7961	-23.2916	-15.9467	-24.5349	-24.331	-19.8646	-18.7679	-15.4967	-20.0213	-16.8894	-17.2967	-20.9818	-15.3049	-19.5177	-16.1685	-17.3139	-18.039	-16.2017	-13.8623	-13.9155	-18.2168	-17.9522	-11.5661	-11.121	-12.5694	-14.5425	-13.2692	-14.019	-16.9229	-15.6778	-15.2819	-16.3833	-18.0312	-17.9681
Ifi203	1	173920407	173942672	-	Ifi203	ENSMUSG00000039997	interferon activated gene 203 [Source:MGI Symbol;Acc:MGI:96428]	-	gene	Name match	0	4.32164e-08	3.96421e-07	-6.4972	-12.2703	-23.2109	-16.76	-16.3615	-24.9497	-24.7458	-20.2794	-19.1827	-15.9115	-20.4361	-17.3042	-17.7115	-21.3967	-15.7197	-19.9325	-16.5833	-17.7288	-18.4538	-16.6166	-14.2771	-14.3303	-18.6316	-18.367	-11.9809	-11.5358	-12.9842	-14.9574	-13.684	-14.4338	-17.3377	-16.0926	-15.6967	-16.7981	-18.446	-18.3829
Ifi205	1	174011998	174031810	-	Ifi205	ENSMUSG00000054203	interferon activated gene 205 [Source:MGI Symbol;Acc:MGI:101847]	-	gene	Name match	0	1.13225e-42	3.63154e-40	-11.0434	-18.5207	-23.0425	-23.538	-16.1931	-24.7813	-24.5774	-20.111	-19.0143	-15.7431	-20.2677	-17.1359	-17.5431	-21.2283	-15.5513	-19.7641	-16.4149	-17.5604	-18.2855	-16.4482	-14.1087	-14.1619	-18.4632	-18.1986	-11.8125	-11.3674	-12.8158	-14.789	-13.5156	-14.2654	-17.1693	-15.9242	-15.5283	-16.6297	-18.2776	-18.2145
Spta1	1	174172776	174248450	+	Spta1	ENSMUSG00000026532	spectrin alpha, erythrocytic 1 [Source:MGI Symbol;Acc:MGI:98385]	+	gene	Name match	0	4.07371e-05	0.000245742	-6.00748	-12.4566	-15.4081	-16.5645	-10.6525	-21.8078	-20.6864	-22.0444	-20.9477	-17.6765	-17.0491	-19.0692	-13.8326	-17.8804	-9.80914	-21.6975	-18.3483	-19.4937	-14.9375	-18.3815	-9.91282	-16.0953	-16.7851	-20.132	-13.7459	-13.3008	-14.7492	-10.2128	-10.0875	-16.1988	-13.1178	-11.8476	-11.1003	-18.5631	-13.2261	-13.4723
Rbm8a2	1	175977777	175979114	-	Rbm8a2	ENSMUSG00000078184	RNA binding motif protein 8A2 [Source:MGI Symbol;Acc:MGI:3612447]	-	gene	Name match	0	4.63191e-07	3.65948e-06	-3.40793	-14.6324	-16.0022	-19.6497	-12.3048	-20.893	-20.6891	-16.2227	-15.126	-11.8548	-16.3794	-13.2476	-13.6548	-17.34	-11.663	-15.8758	-12.5266	-13.6721	-14.3972	-12.5599	-10.2204	-10.2736	-14.5749	-14.3103	-7.92421	-7.47914	-8.92751	-10.9007	-9.62729	-10.3771	-13.281	-12.0359	-11.64	-12.7414	-14.3893	-14.3262
Cep170	1	176733653	176814067	-	Cep170	ENSMUSG00000057335	centrosomal protein 170 [Source:MGI Symbol;Acc:MGI:1918348]	-	gene	Name match	0	1.73311e-08	1.67027e-07	-2.98925	-11.7898	-25.0635	-18.2777	-11.9746	-26.8023	-26.5984	-16.5206	-21.0353	-17.7641	-22.2887	-19.1569	-19.5641	-16.5123	-11.5624	-21.7851	-18.436	-19.5814	-20.3065	-18.4692	-16.1298	-16.1829	-20.4842	-15.6753	-13.8335	-13.3885	-9.59736	-16.81	-15.5366	-16.2865	-19.1903	-17.9452	-17.5494	-18.6507	-20.2986	-15.0391
Gm38104	1	176751521	176753415	-	Gm38104	ENSMUSG00000104154	predicted gene, 38104 [Source:MGI Symbol;Acc:MGI:5611332]	-	gene	Name match	0	0.00121484	0.00583345	-5.39639	-15.1346	-19.6563	-20.1518	-12.8069	-21.3951	-21.1912	-16.7248	-15.6281	-12.3569	-16.8815	-13.7497	-14.1569	-17.8421	-12.1652	-16.3779	-13.0288	-14.1742	-14.8993	-13.062	-10.7226	-10.7757	-15.077	-14.8124	-8.42633	-7.98126	-9.42963	-11.4028	-10.1294	-10.8793	-13.7831	-12.538	-12.1422	-13.2435	-14.8914	-14.8283
Sdccag8	1	176814660	177020437	+	Sdccag8	ENSMUSG00000026504	serologically defined colon cancer antigen 8 [Source:MGI Symbol;Acc:MGI:1924066]	+	gene	Name match	0	6.79954e-11	9.10197e-10	-8.04929	-11.7524	-26.4191	-17.5028	-11.8554	-28.1579	-20.3841	-15.4901	-22.3909	-11.6013	-15.778	-13.5149	-15.6802	-24.6048	-12.1466	-16.374	-19.7915	-14.463	-21.662	-13.5642	-17.4853	-17.5385	-16.4024	-16.2939	-15.1891	-14.744	-16.1924	-13.2062	-11.0677	-11.8176	-14.9345	-13.9788	-10.5002	-20.0063	-15.1099	-14.9472
Gm37519	1	176974236	176976445	+	Gm37519	ENSMUSG00000103251	predicted gene, 37519 [Source:MGI Symbol;Acc:MGI:5610747]	+	gene	Name match	0	0.000497027	0.00255705	-6.56465	-15.3564	-19.8782	-20.3737	-13.0288	-21.617	-21.4131	-16.9467	-15.85	-12.5788	-17.1034	-13.9715	-14.3788	-18.0639	-12.387	-16.5998	-13.2506	-14.396	-15.1211	-13.2838	-10.9444	-10.9976	-15.2989	-15.0343	-8.64818	-8.20311	-9.65147	-11.6246	-10.3513	-11.1011	-14.005	-12.7598	-12.364	-13.4654	-15.1133	-15.0502
Akt3	1	177020073	177258203	-	Akt3	ENSMUSG00000019699	thymoma viral proto-oncogene 3 [Source:MGI Symbol;Acc:MGI:1345147]	-	gene	Name match	0	2.99753e-09	3.20472e-08	-7.62278	-12.6251	-17.8965	-9.65644	-13.1526	-28.3685	-21.7647	-18.5019	-18.0572	-14.4779	-17.8203	-15.6642	-21.1303	-24.8155	-14.6646	-23.3513	-20.0022	-21.1476	-21.8727	-20.0354	-12.1864	-17.7491	-16.854	-21.7858	-15.3997	-14.9547	-16.403	-11.4693	-11.0201	-17.8527	-16.2826	-14.6045	-11.5542	-15.817	-18.3909	-14.6839
Zbtb18	1	177442351	177450764	+	Zbtb18	ENSMUSG00000063659	zinc finger and BTB domain containing 18 [Source:MGI Symbol;Acc:MGI:1353609]	+	gene	Name match	0	0.00123334	0.00590952	-4.04854	-11.179	-21.8069	-22.3024	-14.9575	-23.5457	-23.3418	-14.8165	-17.7787	-14.5075	-14.7102	-11.5003	-11.4006	-19.9927	-14.3158	-18.5285	-15.1794	-11.9249	-17.0499	-15.2126	-12.8732	-12.9263	-17.2276	-16.963	-10.5769	-10.1319	-11.5802	-13.5534	-12.28	-13.0299	-15.9337	-14.6886	-14.2928	-15.3941	-17.042	-12.8269
Adss	1	177762962	177796511	-	Adss	ENSMUSG00000015961	adenylosuccinate synthetase, non muscle [Source:MGI Symbol;Acc:MGI:87948]	-	gene	Name match	0	4.29021e-09	4.50422e-08	-4.71335	-13.3212	-15.3239	-14.7796	-16.9529	-19.0316	-25.3373	-16.1953	-19.7741	-11.5436	-16.4833	-17.8957	-18.303	-21.9881	-16.3112	-20.524	-12.5634	-18.3202	-19.0453	-17.208	-10.3243	-10.1848	-15.2637	-18.9585	-12.5724	-12.1273	-13.5757	-11.9374	-14.2754	-15.0253	-17.9292	-16.684	-11.9663	-17.3896	-15.0781	-18.9744
Desi2	1	178187417	178257301	+	Desi2	ENSMUSG00000026502	desumoylating isopeptidase 2 [Source:MGI Symbol;Acc:MGI:1926075]	+	gene	Name match	0	0.00113928	0.00550104	-2.51676	-11.9205	-15.1035	-7.28506	-12.1047	-26.5998	-26.396	-21.9296	-20.8328	-17.5616	-22.0863	-13.995	-19.3616	-23.0468	-17.3699	-21.5826	-18.2335	-19.3789	-15.367	-18.2667	-15.9273	-10.9215	-20.2817	-13.5253	-13.631	-13.186	-9.09002	-16.6075	-15.3341	-16.084	-18.9879	-13.3428	-17.3469	-18.4482	-20.0962	-20.033
B230369F24Rik	1	178313328	178318549	-	B230369F24Rik	ENSMUSG00000086350	RIKEN cDNA B230369F24 gene [Source:MGI Symbol;Acc:MGI:2443392]	-	gene	Name match	0	0.00294701	0.013235	-6.12998	-16.597	-21.1187	-21.6142	-14.2693	-22.8575	-22.6537	-18.1872	-17.0905	-13.8193	-18.3439	-15.2121	-15.6193	-19.3045	-13.6276	-17.8403	-14.4912	-15.6366	-16.3617	-14.5244	-12.185	-12.2381	-16.5394	-16.2748	-9.88874	-9.44366	-10.892	-12.8652	-11.5918	-12.3417	-15.2456	-14.0004	-13.6046	-14.7059	-16.3538	-16.2907
Cox20	1	178319130	178322693	+	Cox20	ENSMUSG00000026500	cytochrome c oxidase assembly protein 20 [Source:MGI Symbol;Acc:MGI:1913609]	+	gene	Name match	0	3.62033e-10	4.36488e-09	-3.51966	-9.80639	-20.5676	-12.6727	-13.7182	-6.63249	-7.6684	-17.6361	-16.5394	-13.2682	-17.7928	-14.661	-15.0682	-18.7534	-13.0765	-17.2892	-13.9401	-15.0855	-15.8106	-13.9733	-11.6339	-11.687	-15.9883	-15.7237	-9.33763	-8.89256	-10.3409	-12.3141	-11.0407	-5.63857	-14.6944	-13.4493	-13.0535	-14.1548	-15.8027	-15.7396
Hnrnpu	1	178321108	178337797	-	Hnrnpu	ENSMUSG00000039630	heterogeneous nuclear ribonucleoprotein U [Source:MGI Symbol;Acc:MGI:1858195]	-	gene	Name match	0	1.52637e-33	2.19939e-31	-6.18391	-10.7119	-22.795	-14.9001	-15.9456	-8.92517	-9.89451	-19.8636	-18.7668	-10.4857	-20.0203	-16.8884	-11.2857	-20.9808	-10.245	-19.5166	-16.1675	-17.3129	-18.038	-16.2007	-13.8613	-13.9144	-18.2157	-17.9511	-11.565	-11.12	-12.5683	-14.5415	-13.2681	-7.86598	-16.9219	-15.6767	-15.2809	-16.3822	-18.0302	-17.967
Smyd3	1	178951960	179518041	-	Smyd3	ENSMUSG00000055067	SET and MYND domain containing 3 [Source:MGI Symbol;Acc:MGI:1916976]	-	gene	Name match	0	0.00097628	0.00476767	-6.01031	-11.9072	-16.8375	-17.5706	-10.4682	-22.2859	-29.4139	-17.0744	-18.4893	-13.9846	-25.1042	-16.6504	-16.3947	-19.9355	-20.3878	-18.1087	-14.7596	-16.7213	-16.6662	-16.2747	-13.2386	-14.1459	-23.2997	-23.0351	-16.649	-16.2039	-17.6523	-12.9343	-10.6844	-19.1019	-22.0058	-20.7607	-16.3059	-14.3717	-18.3771	-23.051
Cnst	1	179546370	179627478	+	Cnst	ENSMUSG00000038949	consortin, connexin sorting protein [Source:MGI Symbol;Acc:MGI:2445141]	+	gene	Name match	0	0.000863661	0.00426214	-6.79798	-12.2272	-16.6065	-17.4421	-18.2265	-26.8147	-26.6108	-17.533	-14.9415	-17.7765	-22.3011	-19.1693	-19.5765	-19.6503	-17.5848	-21.7975	-18.4484	-19.5938	-20.3189	-18.4816	-16.1422	-16.1953	-20.4966	-20.232	-13.8459	-13.4009	-14.8492	-16.8224	-15.549	-16.2989	-19.2027	-17.9576	-17.5618	-14.4236	-20.311	-20.2479
Sccpdh	1	179668210	179687189	+	Sccpdh	ENSMUSG00000038936	saccharopine dehydrogenase (putative) [Source:MGI Symbol;Acc:MGI:1924486]	+	gene	Name match	0	0.00104244	0.00506919	-1.95986	-11.8805	-14.5711	-18.0386	-16.1311	-24.7193	-24.5155	-14.2823	-18.9523	-15.6811	-20.2057	-17.0739	-17.4811	-21.1663	-9.38317	-19.7021	-16.353	-17.4984	-18.2235	-16.3862	-14.0468	-14.0999	-18.4012	-18.1366	-11.7505	-11.3055	-12.7538	-9.87457	-8.09216	-14.2035	-17.1074	-15.8622	-15.4664	-16.5677	-18.2157	-18.1525
Ahctf1	1	179744894	179803680	-	Ahctf1	ENSMUSG00000026491	AT hook containing transcription factor 1 [Source:MGI Symbol;Acc:MGI:1915033]	-	gene	Name match	0	0.000430563	0.00223319	-2.38599	-12.4866	-24.6115	-11.8787	-17.7621	-26.3503	-26.1465	-21.6801	-16.1094	-17.3122	-16.3994	-18.7049	-12.6564	-22.7973	-12.3245	-21.3332	-17.984	-19.1294	-19.8545	-18.0172	-15.6778	-15.7309	-20.0322	-19.7676	-13.3816	-12.9365	-14.3849	-16.358	-15.0846	-15.8345	-18.7384	-17.4932	-17.0974	-18.1987	-19.8467	-19.7835
Cdc42bpa	1	179960472	180165603	+	Cdc42bpa	ENSMUSG00000026490	CDC42 binding protein kinase alpha [Source:MGI Symbol;Acc:MGI:2441841]	+	gene	Name match	0	2.57065e-34	4.03049e-32	-8.9557	-12.6427	-17.4487	-17.9507	-13.5551	-28.1533	-27.9495	-23.4831	-13.0031	-19.1151	-23.6397	-20.5079	-13.1121	-24.6003	-18.9234	-23.1361	-19.787	-20.9324	-21.6575	-12.0983	-17.4808	-17.5339	-16.8759	-17.0967	-15.1845	-14.7395	-16.1878	-18.161	-10.6271	-17.6375	-20.5414	-19.2962	-18.9004	-20.0017	-15.2309	-21.5865
Coq8a	1	180165238	180199602	-	Coq8a	ENSMUSG00000026489	coenzyme Q8A [Source:MGI Symbol;Acc:MGI:1914676]	-	gene	Name match	0	0.00659435	0.0281651	-4.55366	-10.9248	-23.837	-24.3325	-12.6656	-25.5758	-21.05	-20.9055	-19.8088	-16.5376	-21.0622	-17.9303	-18.3376	-13.905	-16.3458	-20.5586	-17.2094	-18.3549	-19.0799	-17.2427	-14.9032	-14.9564	-13.6794	-18.9931	-12.607	-12.1619	-13.6103	-15.5835	-14.3101	-15.0599	-17.9638	-16.7187	-16.3228	-17.4242	-19.0721	-19.009
Psen2	1	180227004	180263438	-	Psen2	ENSMUSG00000010609	presenilin 2 [Source:MGI Symbol;Acc:MGI:109284]	-	gene	Name match	0	0.00280718	0.0126581	-4.79747	-11.5265	-16.7359	-24.4169	-17.072	-25.6602	-25.4563	-12.9552	-15.4932	-16.622	-21.1466	-18.0147	-14.685	-22.1072	-10.6058	-20.643	-17.2938	-18.4393	-19.1643	-17.327	-14.9876	-15.0408	-19.3421	-19.0775	-12.6914	-12.2463	-13.6947	-15.6679	-8.31172	-15.1443	-11.5563	-11.4031	-10.6114	-12.0346	-14.917	-19.0934
Acbd3	1	180726043	180754204	+	Acbd3	ENSMUSG00000026499	acyl-Coenzyme A binding domain containing 3 [Source:MGI Symbol;Acc:MGI:2181074]	+	gene	Name match	0	2.10512e-14	4.37636e-13	-8.2864	-11.2394	-16.2179	-24.0453	-11.741	-25.2886	-25.0847	-20.6183	-19.5216	-11.9285	-20.775	-17.6432	-18.0504	-21.7356	-16.0586	-20.2714	-12.0698	-18.0677	-18.7928	-16.9555	-14.616	-10.1953	-18.9705	-18.7059	-12.3198	-11.8747	-13.3231	-15.2963	-14.0229	-14.7727	-17.6766	-16.4315	-16.0356	-17.137	-18.7849	-18.7218
H3f3a	1	180800832	180813943	-	H3f3a	ENSMUSG00000060743	H3 histone, family 3A [Source:MGI Symbol;Acc:MGI:1097686]	-	gene	Name match	0	3.74582e-23	2.05104e-21	-5.01059	-13.4512	-22.4469	-14.0124	-15.5975	-7.52385	-23.9819	-19.5155	-18.4187	-15.1475	-19.6722	-16.5403	-12.2106	-20.6327	-14.9558	-14.5571	-15.8194	-16.9648	-13.0785	-15.8526	-13.5132	-13.5663	-17.8676	-17.603	-11.217	-10.7719	-5.16135	-14.1934	-12.92	-13.6699	-16.5738	-10.5917	-14.9328	-16.0341	-17.6821	-17.6189
Gm17275	1	180802568	180809483	+	Gm17275	ENSMUSG00000097347	predicted gene, 17275 [Source:MGI Symbol;Acc:MGI:4936909]	+	gene	Name match	0	1.15283e-19	4.47441e-18	-4.30539	-17.0023	-21.5241	-13.0895	-14.6746	-7.82288	-23.059	-18.5926	-17.4958	-14.2247	-18.7493	-15.6174	-16.0247	-19.7098	-14.0329	-13.6342	-14.8965	-16.0419	-12.1556	-14.9297	-12.5903	-12.6435	-16.9448	-16.6802	-10.2941	-9.849	-11.2974	-13.2705	-11.9971	-12.747	-15.6509	-14.4057	-14.0099	-15.1113	-16.7592	-16.6961
Sde2	1	180851127	180868113	+	Sde2	ENSMUSG00000038806	SDE2 telomere maintenance homolog (S. pombe) [Source:MGI Symbol;Acc:MGI:2384788]	+	gene	Name match	0	0.00245287	0.0111637	-1.7261	-12.2887	-22.8205	-23.316	-15.9711	-20.1593	-24.3554	-15.4151	-18.7923	-15.5211	-20.0457	-16.9138	-17.3211	-21.0063	-15.3293	-19.5421	-16.1929	-17.3384	-18.0634	-16.2261	-13.8867	-13.9399	-18.2412	-17.9766	-11.5905	-11.1454	-12.5938	-14.567	-13.2936	-14.0434	-16.9473	-15.7022	-10.347	-16.4077	-18.0556	-17.9925
Ephx1	1	180976210	181020904	-	Ephx1	ENSMUSG00000038776	epoxide hydrolase 1, microsomal [Source:MGI Symbol;Acc:MGI:95405]	-	gene	Name match	0	1.92813e-28	1.78244e-26	-10.1385	-11.8771	-19.8162	-24.7117	-11.3321	-22.3435	-25.7511	-21.2847	-20.1879	-16.9168	-21.4414	-18.3095	-18.7168	-22.4019	-16.725	-20.9378	-17.5886	-18.734	-19.4591	-13.7694	-15.2824	-15.3356	-19.6369	-19.3723	-12.9862	-12.5411	-13.9895	-15.9626	-14.6892	-15.4391	-18.343	-17.0978	-16.702	-17.8034	-19.4513	-19.3882
Nvl	1	181087138	181144204	-	Nvl	ENSMUSG00000026516	nuclear VCP-like [Source:MGI Symbol;Acc:MGI:1914709]	-	gene	Name match	0	8.70984e-06	5.81926e-05	-5.1972	-11.6282	-17.2978	-16.6738	-13.4798	-22.455	-21.0447	-21.6372	-20.5405	-17.2693	-21.7939	-18.6621	-19.0693	-22.7545	-17.0775	-21.2903	-17.9411	-19.0866	-19.8117	-12.537	-15.6349	-15.6881	-19.9894	-19.7248	-13.3387	-12.8936	-14.342	-10.5782	-15.0418	-15.7917	-18.6955	-17.4504	-17.0546	-18.1559	-19.8038	-19.7407
Cnih4	1	181144693	181168994	+	Cnih4	ENSMUSG00000062169	cornichon family AMPA receptor auxiliary protein 4 [Source:MGI Symbol;Acc:MGI:1925828]	+	gene	Name match	0	3.65575e-11	5.09044e-10	-4.13731	-12.856	-23.3371	-17.6583	-16.4877	-25.0759	-24.8721	-15.8613	-19.3089	-8.61894	-20.5623	-17.4305	-17.8377	-21.5229	-12.524	-20.0587	-16.7096	-17.855	-18.5801	-16.7428	-14.4034	-9.60408	-18.7578	-18.4932	-12.1071	-11.6621	-13.1104	-15.0836	-13.8102	-14.5601	-17.464	-16.2188	-15.823	-16.9243	-18.5722	-18.5091
Wdr26	1	181173228	181212001	-	Wdr26	ENSMUSG00000038733	WD repeat domain 26 [Source:MGI Symbol;Acc:MGI:1923825]	-	gene	Name match	0	3.93466e-12	6.1964e-11	-5.70388	-9.82365	-24.0111	-11.0088	-11.0324	-16.4816	-13.4461	-15.0208	-19.9829	-16.7117	-21.2364	-18.1045	-18.5117	-22.1969	-10.4372	-20.7327	-12.1441	-18.529	-19.2541	-17.4168	-15.0774	-15.1305	-19.4318	-19.1672	-12.7812	-12.3361	-13.7844	-15.7576	-14.4842	-15.2341	-18.138	-16.8928	-16.497	-17.5983	-14.0068	-19.1831
Dnah14	1	181576559	181815774	+	Dnah14	ENSMUSG00000047369	dynein, axonemal, heavy chain 14 [Source:MGI Symbol;Acc:MGI:2444525]	+	gene	Name match	0	4.66118e-09	4.87213e-08	-4.14376	-11.5973	-16.9924	-17.3578	-15.0499	-28.3751	-24.0192	-16.1953	-18.9966	-19.3369	-17.4241	-20.7296	-16.341	-24.8221	-13.9931	-23.3579	-20.0087	-21.1542	-21.8792	-14.642	-17.7025	-17.7557	-15.0102	-15.2141	-15.4063	-14.9612	-16.4096	-18.3828	-12.2569	-13.4593	-20.7631	-19.518	-14.2152	-20.2235	-21.8714	-17.0713
Lbr	1	181815335	181843046	-	Lbr	ENSMUSG00000004880	lamin B receptor [Source:MGI Symbol;Acc:MGI:2138281]	-	gene	Name match	0	5.43517e-13	9.48251e-12	-5.33116	-12.2829	-23.5266	-16.3465	-16.6771	-25.2653	-25.0615	-14.377	-19.4983	-16.2272	-20.7518	-12.5137	-18.0272	-21.7123	-16.0354	-20.2482	-16.899	-18.0444	-18.7695	-16.9322	-14.5928	-14.646	-18.9473	-18.6827	-12.2966	-11.8515	-13.2999	-15.273	-13.9996	-14.7495	-17.6534	-16.4082	-16.0124	-17.1138	-14.6097	-18.6986
Enah	1	181896384	182019990	-	Enah	ENSMUSG00000022995	ENAH actin regulator [Source:MGI Symbol;Acc:MGI:108360]	-	gene	Name match	0	7.90483e-05	0.000456574	-2.60819	-11.6971	-15.133	-19.7053	-13.3969	-14.5127	-27.2187	-16.1245	-17.1816	-18.3843	-17.509	-13.4958	-15.9449	-19.7175	-11.9321	-22.4053	-19.0562	-20.2016	-20.9267	-13.6155	-16.75	-16.8031	-21.1044	-20.8398	-14.4538	-14.0087	-15.457	-10.6058	-16.1568	-12.9473	-15.7517	-13.5554	-13.6253	-19.2709	-16.2433	-20.8557
Srp9	1	182124737	182132407	+	Srp9	ENSMUSG00000026511	signal recognition particle 9 [Source:MGI Symbol;Acc:MGI:1350930]	+	gene	Name match	0	1.40724e-05	9.13294e-05	-2.67573	-12.3559	-21.6735	-22.1691	-14.8241	-7.56713	-23.2085	-18.7421	-17.6453	-14.3741	-18.8988	-15.7669	-16.1741	-19.8593	-9.63806	-18.3951	-15.046	-16.1914	-16.9165	-15.0792	-12.7398	-12.7929	-17.0942	-16.8296	-10.4435	-9.99848	-11.4468	-13.42	-12.1466	-12.8965	-15.8004	-14.5552	-14.1594	-15.2607	-16.9087	-16.8455
Degs1	1	182275772	182282804	-	Degs1	ENSMUSG00000038633	delta(4)-desaturase, sphingolipid 1 [Source:MGI Symbol;Acc:MGI:1097711]	-	gene	Name match	0	2.04159e-18	7.0273e-17	-5.25245	-11.0671	-21.5483	-22.0438	-14.6988	-23.287	-17.7613	-18.6168	-17.52	-14.2489	-18.7735	-15.6416	-16.0489	-19.734	-14.0571	-18.2699	-14.9207	-16.0661	-16.7912	-14.9539	-12.6145	-12.6677	-16.969	-16.7044	-10.3183	-9.8732	-11.3216	-13.2947	-12.0213	-12.7712	-15.6751	-14.4299	-14.0341	-15.1355	-16.7834	-16.7203
1700047M11Rik	1	182287990	182303325	+	1700047M11Rik	ENSMUSG00000100147	RIKEN cDNA 1700047M11 gene [Source:MGI Symbol;Acc:MGI:1914580]	+	gene	Name match	0	0.00119912	0.00576495	-5.41131	-18.1512	-22.673	-23.1685	-15.8236	-24.4118	-24.2079	-19.7415	-18.6448	-15.3736	-19.8982	-11.3664	-17.1736	-20.8588	-15.1818	-19.3946	-16.0454	-17.1908	-17.9159	-16.0786	-13.7392	-13.7924	-18.0937	-17.8291	-11.443	-10.9979	-12.4463	-14.4194	-13.1461	-13.8959	-16.7998	-15.5547	-15.1588	-16.2602	-17.9081	-17.845
Fbxo28	1	182313102	182341629	-	Fbxo28	ENSMUSG00000047539	F-box protein 28 [Source:MGI Symbol;Acc:MGI:1261890]	-	gene	Name match	0	4.19828e-05	0.000252528	-8.2025	-12.4352	-23.5684	-24.0639	-16.719	-25.3072	-20.3075	-20.6369	-19.5402	-16.269	-20.7936	-13.8093	-13.3935	-21.7542	-16.0773	-20.29	-16.9409	-18.0863	-18.8114	-16.9741	-14.6347	-14.6878	-18.9891	-18.7245	-12.3384	-11.8934	-13.3417	-15.3149	-14.0415	-14.7914	-17.6953	-16.4501	-11.6543	-17.1556	-18.8036	-18.7404
Trp53bp2	1	182409172	182462432	+	Trp53bp2	ENSMUSG00000026510	transformation related protein 53 binding protein 2 [Source:MGI Symbol;Acc:MGI:2138319]	+	gene	Name match	0	0.000315755	0.00167382	-6.61311	-10.403	-18.4842	-24.9646	-12.0414	-26.2079	-26.0041	-14.8465	-20.4409	-17.1697	-21.6943	-13.1251	-14.2328	-22.6549	-16.978	-16.0387	-17.8416	-18.987	-19.7121	-17.8748	-15.5354	-15.5885	-19.8898	-19.6252	-13.2391	-12.7941	-14.2424	-16.2156	-14.9422	-15.6921	-18.596	-17.3508	-16.955	-18.0563	-15.3043	-19.6411
Capn2	1	182467260	182517608	-	Capn2	ENSMUSG00000026509	calpain 2 [Source:MGI Symbol;Acc:MGI:88264]	-	gene	Name match	0	1.4345e-16	3.97316e-15	-5.30151	-11.8255	-16.6066	-24.8835	-17.5386	-26.1268	-25.9229	-21.4565	-20.3598	-17.0886	-21.6132	-18.4814	-18.8886	-22.5738	-11.99	-21.1096	-17.7605	-18.9059	-19.631	-17.7937	-15.4543	-15.5074	-19.8087	-19.5441	-13.158	-12.713	-14.1613	-16.1345	-14.8611	-15.611	-18.5148	-12.5327	-16.8739	-17.9752	-19.6231	-19.56
Disp1	1	183086266	183221522	-	Disp1	ENSMUSG00000030768	dispatched RND transporter family member 1 [Source:MGI Symbol;Acc:MGI:1916147]	-	gene	Name match	0	1.46121e-07	1.24724e-06	-5.32496	-11.595	-18.3218	-16.8018	-13.1684	-27.5525	-27.3486	-16.6427	-15.961	-18.5143	-23.0389	-15.1701	-14.8404	-18.5255	-18.3225	-16.991	-19.1861	-20.3316	-21.0566	-19.2193	-16.8799	-16.9331	-21.2344	-16.4958	-14.5837	-14.1386	-15.587	-17.5602	-16.2868	-17.0366	-19.9405	-18.6954	-13.9776	-14.001	-21.0488	-20.9857
Brox	1	183276352	183297269	-	Brox	ENSMUSG00000046836	BRO1 domain and CAAX motif containing [Source:MGI Symbol;Acc:MGI:1918928]	-	gene	Name match	0	1.41996e-06	1.04893e-05	-3.21363	-12.5644	-15.9915	-15.2259	-10.9495	-24.8596	-24.6557	-20.1893	-19.0926	-15.8214	-20.346	-11.7402	-17.6214	-21.3066	-15.6296	-19.8424	-16.4932	-17.6387	-18.3638	-16.5265	-14.187	-14.2402	-18.5415	-18.2769	-11.8908	-11.4457	-12.8941	-14.8673	-13.5939	-14.3437	-17.2476	-16.0025	-15.6066	-16.708	-18.3559	-18.2928
Aida	1	183296590	183325476	+	Aida	ENSMUSG00000042901	axin interactor, dorsalization associated [Source:MGI Symbol;Acc:MGI:1919737]	+	gene	Name match	0	2.38228e-15	5.59286e-14	-7.41471	-11.4049	-6.74725	-9.42821	-11.0932	-16.9253	-25.1214	-20.655	-19.5583	-16.2871	-20.8117	-17.6798	-18.0871	-21.7722	-16.0953	-20.3081	-16.9589	-18.1043	-18.8294	-16.9921	-14.6527	-14.7059	-19.0072	-18.7426	-12.3565	-11.9114	-13.3598	-15.3329	-14.0596	-14.8094	-17.7133	-16.4682	-16.0723	-17.1737	-18.8216	-18.7585
Mia3	1	183326725	183369553	-	Mia3	ENSMUSG00000056050	melanoma inhibitory activity 3 [Source:MGI Symbol;Acc:MGI:2443183]	-	gene	Name match	0	1.79237e-19	6.83e-18	-9.044	-10.5891	-15.2378	-16.0803	-17.3052	-25.8934	-25.6896	-21.2232	-20.1264	-16.8552	-21.3799	-13.096	-18.6552	-22.3404	-16.6635	-20.8762	-17.5271	-18.6725	-19.3976	-17.5603	-15.2209	-15.274	-19.5753	-19.3107	-12.9247	-12.4796	-13.9279	-10.7047	-14.6277	-15.3776	-18.2815	-17.0363	-11.279	-12.946	-15.4304	-19.3266
Taf1a	1	183388981	183410198	+	Taf1a	ENSMUSG00000072258	TATA-box binding protein associated factor, RNA polymerase I, A [Source:MGI Symbol;Acc:MGI:109578]	+	gene	Name match	0	0.000378722	0.00198602	-4.99256	-13.7127	-23.1413	-15.3049	-16.2919	-24.8801	-24.6763	-20.2099	-19.1131	-15.8419	-20.3666	-17.2347	-17.6419	-21.3271	-15.6502	-15.0105	-16.5138	-17.6592	-18.3843	-10.3075	-14.2076	-14.2607	-18.562	-18.2974	-11.9114	-11.4663	-12.9146	-14.8878	-13.6144	-14.3643	-17.2682	-16.023	-9.26573	-16.7285	-18.3765	-18.3133
2002-03-01	1	184813068	184846451	-	2002-03-01	ENSMUSG00000073481	mitochondrial amidoxime reducing component 2 [Source:MGI Symbol;Acc:MGI:1914497]	-	gene	Name match	0	6.18158e-06	4.21392e-05	-6.27706	-12.5979	-23.7952	-20.0513	-16.9458	-25.534	-25.3301	-20.8637	-19.767	-16.4958	-21.0204	-17.8886	-18.2958	-17.3054	-16.3041	-20.5168	-17.1676	-18.3131	-14.1313	-17.2009	-14.8614	-14.9146	-19.2159	-18.9513	-12.5652	-12.1201	-13.5685	-10.1802	-14.2683	-15.0182	-17.922	-12.9399	-16.2811	-17.3824	-19.0303	-18.9672
Rab3gap2	1	185204117	185286759	+	Rab3gap2	ENSMUSG00000039318	RAB3 GTPase activating protein subunit 2 [Source:MGI Symbol;Acc:MGI:1916043]	+	gene	Name match	0	5.27992e-13	9.21616e-12	-7.92682	-10.5511	-25.1029	-15.7254	-12.1015	-26.8417	-26.6379	-22.1715	-21.0747	-17.8035	-17.8542	-19.1963	-15.2816	-23.2887	-17.6118	-21.8246	-18.4754	-15.1469	-20.3459	-18.5086	-12.1103	-16.2223	-20.5236	-20.259	-13.873	-13.4279	-14.8763	-16.8494	-15.576	-16.3259	-19.2298	-17.9846	-17.5888	-18.6901	-15.0161	-14.7306
Iars2	1	185284726	185329396	-	Iars2	ENSMUSG00000026618	isoleucine-tRNA synthetase 2, mitochondrial [Source:MGI Symbol;Acc:MGI:1919586]	-	gene	Name match	0	0.000354516	0.00186761	-4.87017	-11.5816	-15.3769	-24.7109	-17.366	-25.9542	-25.7503	-16.7396	-20.1872	-16.916	-21.4406	-18.3087	-18.716	-22.4012	-16.7242	-20.937	-17.5878	-18.7333	-14.914	-17.6211	-15.2816	-15.3348	-19.6361	-15.132	-12.9854	-12.5403	-13.9887	-15.9619	-14.6885	-15.4383	-18.3422	-17.0971	-12.2273	-17.8026	-19.4505	-19.3874
Bpnt1	1	185332149	185357777	+	Bpnt1	ENSMUSG00000026617	bisphosphate 3'-nucleotidase 1 [Source:MGI Symbol;Acc:MGI:1338800]	+	gene	Name match	0	5.2906e-15	1.18352e-13	-8.79421	-15.4181	-15.8356	-23.9093	-16.5644	-25.1526	-24.9488	-20.4823	-19.3856	-16.1144	-20.639	-17.5072	-17.9144	-21.5996	-15.9227	-20.1354	-16.7863	-14.0793	-18.6568	-16.8195	-14.4801	-14.5332	-18.8345	-18.5699	-12.1838	-11.7388	-13.1871	-15.1603	-13.8869	-14.6368	-17.5407	-16.2955	-15.8997	-17.001	-18.649	-18.5858
Eprs	1	185363044	185428360	+	Eprs	ENSMUSG00000026615	glutamyl-prolyl-tRNA synthetase [Source:MGI Symbol;Acc:MGI:97838]	+	gene	Name match	0	1.95414e-21	8.9621e-20	-6.42254	-10.7104	-13.5905	-17.3928	-11.3698	-21.2628	-20.3391	-13.1643	-20.7353	-17.4641	-21.9887	-12.4195	-12.3177	-22.9493	-17.2724	-15.5782	-12.736	-19.2814	-20.0065	-18.1692	-15.8297	-15.8829	-14.6746	-19.9196	-13.5335	-13.0884	-14.5368	-16.51	-15.2366	-15.9865	-18.8903	-12.4932	-10.3292	-12.4438	-15.8466	-13.4616
Lyplal1	1	186087731	186117310	-	Lyplal1	ENSMUSG00000039246	lysophospholipase-like 1 [Source:MGI Symbol;Acc:MGI:2385115]	-	gene	Name match	0	0.000224503	0.00122119	-6.74156	-12.8384	-23.6207	-24.1162	-9.63057	-25.3595	-25.1556	-20.6892	-19.5925	-16.3213	-20.8459	-17.714	-18.1213	-21.8064	-16.1295	-20.3423	-16.9931	-18.1385	-18.8636	-17.0263	-14.6869	-14.7401	-19.0414	-18.7768	-12.3907	-11.9456	-13.394	-15.3671	-14.0938	-14.8436	-17.7475	-16.5024	-16.1065	-17.2079	-18.8558	-18.7927
Tgfb2	1	186622792	186705989	-	Tgfb2	ENSMUSG00000039239	transforming growth factor, beta 2 [Source:MGI Symbol;Acc:MGI:98726]	-	gene	Name match	0	7.13334e-18	2.30593e-16	-6.80921	-11.5654	-21.0537	-18.4008	-12.7893	-12.6917	-26.6475	-22.1811	-21.0844	-13.7543	-22.3378	-19.206	-15.5543	-23.2984	-17.6214	-21.8342	-18.485	-19.6305	-15.5031	-14.5589	-16.1788	-16.232	-20.5333	-20.2687	-13.8826	-13.4375	-14.8859	-16.8591	-15.5857	-16.3355	-19.2394	-17.9943	-17.5984	-18.6998	-20.3477	-20.2846
Rrp15	1	186720978	186749358	-	Rrp15	ENSMUSG00000001305	ribosomal RNA processing 15 homolog (S. cerevisiae) [Source:MGI Symbol;Acc:MGI:1914473]	-	gene	Name match	0	1.80237e-05	0.000114571	-7.07505	-12.0417	-15.1802	-24.0565	-11.6527	-25.2998	-25.0959	-20.6295	-19.5328	-16.2616	-20.7862	-17.6543	-18.0616	-21.7468	-11.4584	-20.2826	-16.9334	-18.0788	-18.8039	-16.9666	-14.6272	-14.6804	-18.9817	-18.7171	-12.331	-11.8859	-13.3343	-15.3075	-14.0341	-14.7839	-17.6878	-16.4427	-16.0468	-17.1482	-18.7961	-18.733
Kctd3	1	188971095	189007841	-	Kctd3	ENSMUSG00000026608	potassium channel tetramerisation domain containing 3 [Source:MGI Symbol;Acc:MGI:2444629]	-	gene	Name match	0	0.000397732	0.00207683	-4.3098	-11.817	-19.3894	-24.4292	-12.5399	-25.6725	-25.4686	-21.0022	-15.5835	-16.6343	-21.1589	-18.027	-18.4343	-22.1195	-16.4425	-20.6553	-17.3061	-18.4516	-19.1766	-13.6024	-14.9999	-15.0531	-19.3544	-19.0898	-12.7037	-12.2586	-13.707	-15.6802	-14.4068	-15.1566	-14.0016	-16.8154	-16.4195	-17.5209	-19.1688	-14.7837
Kcnk2	1	189207930	189402273	-	Kcnk2	ENSMUSG00000037624	potassium channel, subfamily K, member 2 [Source:MGI Symbol;Acc:MGI:109366]	-	gene	Name match	0	3.0842e-07	2.51246e-06	-7.17587	-12.3636	-16.6967	-18.2538	-11.7205	-11.9742	-27.8715	-19.2531	-22.3084	-19.0372	-23.5618	-20.4299	-16.4373	-18.7265	-18.8454	-23.0582	-19.709	-15.243	-21.5795	-19.7423	-17.4028	-17.456	-16.0203	-21.4927	-15.1066	-14.6615	-16.1099	-18.0831	-16.8097	-17.5595	-20.4634	-19.2183	-18.8224	-19.9238	-21.5717	-15.5237
Angel2	1	190925112	190946962	+	Angel2	ENSMUSG00000026634	angel homolog 2 [Source:MGI Symbol;Acc:MGI:1196310]	+	gene	Name match	0	3.03113e-14	6.18583e-13	-8.16451	-11.1437	-13.7957	-15.2889	-16.3343	-19.6831	-24.7187	-20.2523	-19.1555	-15.8844	-20.409	-17.2771	-17.6844	-21.3695	-11.5406	-19.9054	-16.5562	-17.7016	-18.4267	-16.5894	-14.25	-14.3032	-18.6044	-18.3398	-11.9538	-11.5087	-12.9571	-14.9302	-9.0454	-14.4067	-17.3106	-16.0654	-15.6696	-16.771	-18.4189	-18.3557
Tatdn3	1	191045826	191062932	-	Tatdn3	ENSMUSG00000026632	TatD DNase domain containing 3 [Source:MGI Symbol;Acc:MGI:1916222]	-	gene	Name match	0	0.000865475	0.00426991	-6.65379	-12.9089	-19.0937	-17.2915	-10.875	-24.5694	-24.3656	-19.8992	-18.8024	-15.5312	-20.0559	-16.924	-11.5645	-21.0164	-15.3395	-19.5522	-16.2031	-17.3485	-18.0736	-16.2363	-13.8969	-13.95	-18.2513	-17.9867	-11.6006	-11.1556	-12.6039	-14.5771	-13.3037	-14.0536	-16.9575	-15.7123	-15.3165	-11.8064	-18.0658	-12.6807
Fam71a	1	191162584	191164817	-	Fam71a	ENSMUSG00000091017	family with sequence similarity 71, member A [Source:MGI Symbol;Acc:MGI:3588202]	-	gene	Name match	0	0.000943573	0.00461745	-6.07764	-15.372	-19.8937	-20.3893	-13.0443	-21.6325	-21.4287	-16.9623	-15.8655	-12.5944	-17.119	-13.9871	-14.3944	-18.0795	-12.4026	-16.6154	-13.2662	-14.4116	-15.1367	-13.2994	-10.96	-11.0132	-15.3144	-15.0498	-8.66376	-8.21869	-9.66706	-11.6402	-10.3668	-11.1167	-14.0206	-12.7754	-12.3796	-13.481	-15.1289	-15.0657
Atf3	1	191170296	191218039	-	Atf3	ENSMUSG00000026628	activating transcription factor 3 [Source:MGI Symbol;Acc:MGI:109384]	-	gene	Name match	0	1.69969e-29	1.71857e-27	-7.12971	-11.9165	-24.3114	-18.7007	-17.462	-21.9913	-25.8463	-21.3799	-20.2832	-12.0526	-17.2147	-14.3458	-14.9595	-17.7013	-11.4588	-21.033	-17.6838	-18.8292	-19.5543	-17.717	-10.1812	-15.4308	-15.6732	-19.4675	-13.0814	-12.6363	-14.0847	-16.0578	-14.7845	-15.5343	-13.6423	-17.193	-16.7972	-13.4986	-19.5465	-19.4834
D730003I15Rik	1	191224454	191226140	+	D730003I15Rik	ENSMUSG00000073478	RIKEN cDNA D730003I15 gene [Source:MGI Symbol;Acc:MGI:1925971]	+	gene	Name match	0	0.00365699	0.0161946	-5.96665	-14.9668	-19.4886	-19.9841	-12.6392	-21.2274	-21.0235	-16.5571	-15.4604	-12.1892	-12.6549	-13.5819	-13.9892	-17.6744	-11.9974	-16.2102	-12.861	-10.0471	-14.7315	-12.8942	-10.5548	-10.608	-14.9093	-14.6447	-8.25859	-7.81352	-9.26189	-11.2351	-9.96167	-10.7115	-13.6154	-12.3703	-11.9744	-13.0758	-14.7237	-14.6606
Nenf	1	191306789	191318194	-	Nenf	ENSMUSG00000037499	neuron derived neurotrophic factor [Source:MGI Symbol;Acc:MGI:1913458]	-	gene	Name match	0	4.00287e-11	5.53911e-10	-4.06808	-11.9282	-22.2458	-22.7414	-15.3964	-7.4303	-23.7808	-19.3144	-18.2176	-7.31871	-15.1491	-8.45249	-11.7871	-20.4316	-9.7447	-18.9675	-15.6183	-16.7637	-17.4888	-15.6515	-8.35272	-13.3652	-17.6665	-17.4019	-11.0159	-10.5708	-12.0192	-13.9923	-12.7189	-13.4688	-16.3727	-10.1175	-14.7317	-11.8737	-17.481	-17.4178
Tmem206	1	191325912	191350914	+	Tmem206	ENSMUSG00000026627	transmembrane protein 206 [Source:MGI Symbol;Acc:MGI:1914200]	+	gene	Name match	0	2.65037e-05	0.000163766	-8.33251	-11.2865	-23.3781	-17.5318	-10.9505	-21.2645	-19.5131	-20.4467	-13.8404	-16.0788	-12.8003	-17.4715	-10.0974	-14.293	-10.4496	-14.7383	-16.7506	-17.896	-13.4247	-11.4224	-14.4444	-14.4976	-11.8524	-18.5342	-12.1482	-11.7031	-13.1515	-9.76317	-13.8512	-14.6011	-17.505	-10.8599	-10.4641	-10.006	-12.0862	-13.4439
Ppp2r5a	1	191351975	191403272	-	Ppp2r5a	ENSMUSG00000026626	protein phosphatase 2, regulatory subunit B', alpha [Source:MGI Symbol;Acc:MGI:2388479]	-	gene	Name match	0	8.02813e-09	8.10306e-08	-4.19268	-12.2574	-17.2295	-17.7698	-13.6062	-8.99735	-25.9499	-16.8079	-20.3867	-17.1156	-14.0703	-13.549	-13.8094	-18.0564	-13.1868	-21.1366	-17.7874	-18.9328	-19.6579	-17.8206	-15.4812	-15.5344	-19.8356	-19.571	-13.185	-12.7399	-14.1883	-10.8395	-14.888	-15.6379	-13.6349	-7.91101	-16.9008	-11.311	-15.9131	-14.3475
Ints7	1	191575636	191623688	+	Ints7	ENSMUSG00000037461	integrator complex subunit 7 [Source:MGI Symbol;Acc:MGI:1924315]	+	gene	Name match	0	1.78874e-09	1.96673e-08	-8.52146	-12.9887	-15.9303	-24.8162	-17.4713	-26.0595	-25.8556	-21.3892	-20.2925	-13.0619	-21.5459	-18.414	-18.8213	-13.9751	-16.8295	-21.0423	-17.6931	-18.8386	-19.5636	-17.7263	-15.3869	-15.4401	-19.7414	-19.4768	-13.0907	-12.6456	-14.094	-16.0672	-10.3938	-15.5436	-18.4475	-17.2024	-16.8065	-17.9079	-19.5558	-19.4927
Lpgat1	1	191717834	191784255	+	Lpgat1	ENSMUSG00000026623	lysophosphatidylglycerol acyltransferase 1 [Source:MGI Symbol;Acc:MGI:2446186]	+	gene	Name match	0	4.125e-11	5.68821e-10	-8.43569	-11.7259	-24.7877	-15.0071	-17.9383	-22.2046	-21.0007	-21.8562	-20.7595	-17.4883	-22.0129	-18.8811	-19.2883	-22.9735	-17.2966	-21.5093	-13.054	-19.3056	-20.0307	-18.1934	-15.8539	-15.9071	-20.2084	-14.7918	-13.5577	-13.1127	-14.561	-11.0968	-15.2608	-16.0107	-18.9145	-17.6694	-17.2736	-18.3749	-14.7415	-19.9597
Gm26879	1	192092355	192099628	+	Gm26879	ENSMUSG00000097089	predicted gene, 26879 [Source:MGI Symbol;Acc:MGI:5477373]	+	gene	Name match	0	1.57057e-10	1.99708e-09	-8.13142	-12.3381	-21.5969	-22.0924	-10.2031	-23.3357	-23.1318	-18.6654	-17.5687	-14.2975	-18.8221	-15.6902	-16.0975	-19.7826	-14.1057	-18.3185	-14.9693	-16.1147	-16.8398	-15.0025	-12.6631	-12.7163	-17.0176	-16.753	-10.3669	-9.92181	-11.3702	-13.3433	-12.07	-12.8198	-15.7237	-14.4786	-14.0827	-15.1841	-16.832	-16.7689
Rcor3	1	192098546	192138062	-	Rcor3	ENSMUSG00000037395	REST corepressor 3 [Source:MGI Symbol;Acc:MGI:2441920]	-	gene	Name match	0	1.08281e-14	2.33001e-13	-8.65389	-12.0338	-17.3319	-19.8585	-8.94964	-25.7773	-25.5735	-21.107	-20.0103	-12.6802	-21.2637	-18.1319	-18.5391	-22.2243	-10.1286	-20.7601	-17.411	-18.5564	-19.2815	-17.4442	-15.1048	-15.1579	-19.4592	-19.1946	-12.8085	-12.3635	-13.8118	-15.785	-14.5116	-15.2615	-18.1654	-12.6807	-16.5244	-17.6257	-19.2736	-19.2105
Sertad4	1	192844488	192855756	-	Sertad4	ENSMUSG00000016262	SERTA domain containing 4 [Source:MGI Symbol;Acc:MGI:2443496]	-	gene	Name match	0	6.45681e-20	2.58789e-18	-5.98652	-12.0952	-22.2284	-22.7239	-15.379	-23.9672	-23.7633	-19.2969	-18.2002	-14.929	-19.4536	-16.3218	-16.729	-13.6772	-14.7373	-18.95	-15.6009	-16.7463	-17.4714	-15.6341	-13.2946	-13.3478	-17.6491	-11.7731	-10.9984	-10.5533	-12.0017	-13.9749	-12.7015	-13.4514	-16.3552	-15.1101	-10.3143	-15.8156	-17.4635	-17.4004
A130010J15Rik	1	193168046	193177832	+	A130010J15Rik	ENSMUSG00000079144	RIKEN cDNA A130010J15 gene [Source:MGI Symbol;Acc:MGI:2441776]	+	gene	Name match	0	0.000858809	0.00424172	-5.13932	-13.1813	-22.025	-22.5205	-10.5	-23.7638	-23.5599	-19.0935	-17.9968	-14.7256	-19.2502	-16.1183	-16.5256	-20.2108	-14.5338	-18.7466	-15.3974	-16.5429	-17.2679	-15.4307	-13.0912	-13.1444	-17.4457	-17.1811	-10.795	-10.3499	-11.7983	-13.7715	-12.4981	-13.2479	-16.1518	-14.9067	-14.5108	-15.6122	-17.2601	-17.197
Hsd11b1	1	193221634	193264075	-	Hsd11b1	ENSMUSG00000016194	hydroxysteroid 11-beta dehydrogenase 1 [Source:MGI Symbol;Acc:MGI:103562]	-	gene	Name match	0	1.66755e-43	5.66069e-41	-11.2508	-11.537	-24.1415	-17.9932	-17.2921	-25.8803	-25.6765	-21.2101	-20.1133	-16.8421	-21.3668	-18.2349	-13.9666	-13.961	-16.6504	-20.8632	-17.514	-18.6594	-19.3845	-17.5472	-15.2078	-15.2609	-19.5622	-19.2976	-12.9116	-12.4665	-13.9148	-15.888	-14.6146	-15.3645	-18.2684	-17.0232	-16.6274	-17.7287	-19.3767	-19.3135
G0s2	1	193272161	193273217	-	G0s2	ENSMUSG00000009633	G0/G1 switch gene 2 [Source:MGI Symbol;Acc:MGI:1316737]	-	gene	Name match	0	3.44192e-34	5.32615e-32	-9.93712	-14.2923	-18.8141	-19.3096	-11.9647	-20.5529	-20.349	-15.8826	-14.7859	-11.5147	-16.0393	-12.9075	-13.3147	-16.9999	-11.3229	-15.5357	-12.1865	-13.332	-14.0571	-12.2198	-9.88034	-9.9335	-14.2348	-13.9702	-7.58411	-7.13904	-8.5874	-10.5606	-9.28718	-10.037	-12.9409	-11.6958	-11.2999	-12.4013	-14.0492	-13.9861
Plxna2	1	194618218	194816869	+	Plxna2	ENSMUSG00000026640	plexin A2 [Source:MGI Symbol;Acc:MGI:107684]	+	gene	Name match	0	0.000225769	0.00122733	-5.48485	-12.056	-16.7164	-15.77	-11.6526	-28.107	-19.8685	-17.6123	-22.34	-14.3933	-16.7976	-14.0616	-20.8688	-18.4713	-14.0246	-23.0898	-14.8882	-20.8861	-15.8445	-19.7739	-11.823	-17.4876	-17.389	-17.0504	-15.1382	-14.6932	-10.5972	-18.1147	-12.0454	-11.7953	-14.5882	-19.2499	-14.8947	-12.8727	-21.6033	-15.0844
Cd34	1	194938819	194961279	+	Cd34	ENSMUSG00000016494	CD34 antigen [Source:MGI Symbol;Acc:MGI:88329]	+	gene	Name match	0	1.12174e-41	3.47165e-39	-7.46964	-12.8493	-14.8331	-23.719	-12.5216	-24.9623	-24.7584	-20.292	-19.1953	-15.9241	-20.4487	-17.3168	-17.7241	-21.4093	-15.7323	-19.9451	-16.5959	-17.7413	-18.4664	-16.6291	-14.2897	-14.3429	-18.6442	-18.3796	-11.9935	-11.5484	-12.9968	-14.9699	-13.6966	-14.4464	-17.3503	-16.1052	-15.7093	-16.8107	-18.4586	-18.3955
Gm16897	1	194955759	194976960	-	Gm16897	ENSMUSG00000097325	predicted gene, 16897 [Source:MGI Symbol;Acc:MGI:4439821]	-	gene	Name match	0	2.96958e-38	6.79774e-36	-6.09257	-12.2767	-23.1402	-23.6358	-12.4384	-24.879	-24.6752	-20.2088	-19.112	-15.8409	-20.3655	-17.2336	-11.6815	-21.326	-15.6491	-19.8619	-16.5127	-17.6581	-18.3832	-16.5459	-14.2065	-14.2597	-18.5609	-18.2963	-11.9103	-11.4652	-12.9136	-14.8867	-13.6133	-14.3632	-17.2671	-11.4776	-15.6261	-16.7275	-18.3754	-18.3122
Cr1l	1	195097382	195131586	-	Cr1l	ENSMUSG00000016481	complement component (3b/4b) receptor 1-like [Source:MGI Symbol;Acc:MGI:88513]	-	gene	Name match	0	4.76313e-08	4.34233e-07	-3.70554	-11.2617	-19.2859	-20.7143	-16.9808	-25.569	-25.3652	-20.8988	-8.2433	-16.5309	-21.0555	-17.9236	-18.3309	-22.016	-16.3391	-20.5519	-17.2027	-18.3481	-19.0732	-17.2359	-14.8965	-14.9497	-19.2509	-7.12915	-12.6003	-12.1552	-13.6036	-15.5767	-14.3033	-15.0532	-17.9571	-16.7119	-16.3161	-17.4175	-19.0654	-19.0023
Cr2	1	195136811	195176716	-	Cr2	ENSMUSG00000026616	complement receptor 2 [Source:MGI Symbol;Acc:MGI:88489]	-	gene	Name match	0	0.00175706	0.00819064	-6.41427	-13.3345	-24.0527	-24.5482	-17.2032	-25.7914	-19.912	-21.1212	-20.0244	-16.7533	-21.2779	-18.146	-13.6464	-22.2384	-16.5615	-20.7743	-17.4251	-18.5705	-19.2956	-17.4583	-15.1189	-15.1721	-19.4733	-19.2087	-12.8227	-12.3776	-13.826	-15.7991	-14.5257	-15.2756	-18.1795	-16.9343	-16.5385	-17.6399	-19.2878	-19.2246
Fam171a1	2	3114224	3227806	+	Fam171a1	ENSMUSG00000050530	family with sequence similarity 171, member A1 [Source:MGI Symbol;Acc:MGI:2442917]	+	gene	Name match	0	7.74227e-05	0.00044813	-6.60494	-12.5173	-16.9059	-16.3856	-8.67461	-27.3005	-21.6967	-22.6302	-17.1336	-12.1103	-17.5057	-19.6551	-20.0623	-23.7475	-13.9186	-14.9415	-18.9342	-20.0796	-16.4048	-18.9674	-11.228	-11.2437	-20.9824	-15.9809	-14.3317	-13.8867	-15.335	-17.3082	-16.0348	-16.7847	-19.6886	-12.0626	-18.0476	-19.1489	-20.7968	-20.7337
Nmt2	2	3284212	3328877	+	Nmt2	ENSMUSG00000026643	N-myristoyltransferase 2 [Source:MGI Symbol;Acc:MGI:1202298]	+	gene	Name match	0	0	0	-12.3876	-11.4173	-24.2152	-24.7107	-17.3658	-25.954	-25.7502	-21.2837	-20.187	-16.9158	-16.1185	-18.3086	-18.7158	-22.401	-16.7241	-20.9368	-17.5877	-18.7331	-19.4582	-17.6209	-15.2815	-15.3346	-19.6359	-19.3713	-12.9852	-12.5402	-13.9885	-15.9617	-14.6883	-15.4382	-18.3421	-17.0969	-16.7011	-17.8024	-19.4503	-19.3872
Rpp38	2	3328949	3332643	-	Rpp38	ENSMUSG00000049950	ribonuclease P/MRP 38 subunit [Source:MGI Symbol;Acc:MGI:2443607]	-	gene	Name match	0	3.92043e-05	0.000237017	-7.29436	-16.0979	-20.6197	-21.1152	-13.7703	-22.3585	-22.1546	-17.6882	-16.5915	-13.3203	-17.8449	-14.7131	-15.1203	-18.8055	-13.1285	-17.3413	-13.9921	-15.1376	-15.8627	-14.0254	-11.6859	-11.7391	-16.0404	-15.7758	-9.38971	-8.94464	-10.393	-12.3662	-11.0928	-11.8426	-14.7465	-13.5014	-13.1055	-14.2069	-15.8548	-15.7917
Hspa14	2	3488850	3512814	-	Hspa14	ENSMUSG00000109865	heat shock protein 14 [Source:MGI Symbol;Acc:MGI:1354164]	-	gene	Name match	0	6.92185e-12	1.0537e-10	-8.61866	-11.2254	-23.317	-17.8791	-12.4087	-25.0558	-24.8519	-14.7099	-19.2888	-11.8656	-20.5422	-17.4103	-17.8176	-21.5028	-15.8258	-20.0386	-16.6894	-17.8349	-18.5599	-16.7226	-14.3832	-14.4364	-18.7377	-18.4731	-12.087	-11.6419	-13.0903	-15.0635	-13.7901	-14.5399	-17.4438	-16.1987	-15.8028	-16.9042	-18.5521	-18.489
Gm45902	2	3504527	3512790	-	Gm45902	ENSMUSG00000051396	predicted gene 45902 [Source:MGI Symbol;Acc:MGI:5805017]	-	gene	Name match	0	0.000138657	0.000776298	-5.53057	-9.68935	-21.781	-22.2765	-14.9315	-23.5197	-23.3159	-18.8495	-17.7527	-14.4816	-19.0062	-15.8743	-16.2816	-19.9667	-14.2898	-18.5026	-15.1534	-16.2988	-17.0239	-15.1866	-12.8472	-12.9004	-17.2017	-16.9371	-10.551	-10.1059	-11.5543	-13.5274	-12.254	-13.0039	-15.9078	-14.6626	-14.2668	-15.3682	-17.0161	-16.953
Frmd4a	2	4017717	4614043	+	Frmd4a	ENSMUSG00000026657	FERM domain containing 4A [Source:MGI Symbol;Acc:MGI:1919850]	+	gene	Name match	0	1.114e-06	8.33825e-06	-5.80551	-11.9118	-18.5423	-17.6059	-12.9927	-29.6929	-21.6159	-16.9281	-17.7515	-14.4803	-17.601	-17.3719	-15.3485	-26.1399	-14.2024	-24.6757	-21.3265	-22.472	-23.197	-21.3597	-19.0203	-19.0735	-23.3748	-18.7102	-16.7241	-16.279	-17.7274	-15.1562	-18.4272	-19.177	-14.9631	-14.1602	-14.2656	-15.3893	-18.1303	-16.3891
Prpf18	2	4622058	4652113	-	Prpf18	ENSMUSG00000039449	pre-mRNA processing factor 18 [Source:MGI Symbol;Acc:MGI:1914479]	-	gene	Name match	0	1.75571e-11	2.54014e-10	-8.34619	-19.1219	-18.7913	-19.5278	-16.7943	-25.3825	-20.8567	-20.7122	-19.6155	-16.3443	-17.547	-17.7371	-18.1443	-21.8295	-16.1525	-20.3653	-17.0161	-18.1616	-18.8867	-17.0494	-14.7099	-14.7631	-15.5905	-18.7998	-12.4137	-11.9686	-13.417	-15.3902	-14.1168	-14.8667	-17.7705	-16.5254	-11.7296	-17.2309	-18.8788	-18.8157
Sephs1	2	4881564	4910557	+	Sephs1	ENSMUSG00000026662	selenophosphate synthetase 1 [Source:MGI Symbol;Acc:MGI:1923580]	+	gene	Name match	0	1.26713e-06	9.42693e-06	-4.16403	-11.5257	-23.5918	-24.0873	-16.7424	-25.3306	-25.1267	-20.6603	-19.5636	-11.681	-16.2056	-17.6852	-13.8529	-21.7776	-12.1413	-20.3134	-13.1118	-18.1097	-18.8348	-16.9975	-14.658	-14.7112	-19.0125	-18.7479	-12.3618	-11.9167	-13.3651	-15.3383	-14.0649	-14.8148	-17.7186	-16.4735	-16.0776	-12.8571	-18.8269	-18.7638
Phyh	2	4919019	4938730	+	Phyh	ENSMUSG00000026664	phytanoyl-CoA hydroxylase [Source:MGI Symbol;Acc:MGI:891978]	+	gene	Name match	0	0.000363076	0.00190931	-2.48522	-10.9351	-16.0502	-15.008	-11.7858	-6.27595	-19.4639	-20.1036	-19.0069	-15.7357	-1.32708	-17.1285	-17.5357	-21.2209	-15.544	-19.7567	-16.4076	-17.553	-18.2781	-16.4408	-14.1014	-14.1545	-13.3038	-18.1912	-11.8051	-11.3601	-12.8084	-14.7816	-13.5082	-5.87245	-8.77154	-15.9168	-15.521	-16.6223	-18.2702	-18.2071
Camk1d	2	5293457	5714515	-	Camk1d	ENSMUSG00000039145	calcium/calmodulin-dependent protein kinase ID [Source:MGI Symbol;Acc:MGI:2442190]	-	gene	Name match	0	7.10246e-06	4.80395e-05	-6.35889	-11.2904	-10.2648	-16.8493	-12.9748	-15.3228	-22.4255	-18.3912	-13.9657	-20.1526	-14.5028	-12.8935	-13.0391	-17.006	-11.1868	-14.9636	-14.1026	-14.3832	-18.221	-20.8577	-11.7813	-12.1526	-15.0696	-22.6081	-16.222	-15.7769	-17.2253	-12.0578	-10.7178	-12.1831	-15.6195	-12.7059	-19.9378	-12.2219	-14.6709	-16.3845
Cdc123	2	5794294	5845164	-	Cdc123	ENSMUSG00000039128	cell division cycle 123 [Source:MGI Symbol;Acc:MGI:2138811]	-	gene	Name match	0	1.30173e-19	5.03586e-18	-9.81299	-13.8712	-15.5539	-17.046	-17.5535	-26.1417	-25.9378	-21.4714	-20.3747	-17.1035	-21.6281	-18.4962	-18.9035	-18.1887	-16.9117	-21.1245	-17.7753	-12.502	-19.6459	-17.8086	-15.4691	-15.5223	-19.8236	-19.559	-13.1729	-12.7278	-14.1762	-16.1494	-14.876	-15.6258	-18.5297	-17.2846	-16.8887	-17.9901	-19.638	-19.5749
Nudt5	2	5845019	5871895	+	Nudt5	ENSMUSG00000025817	nudix (nucleoside diphosphate linked moiety X)-type motif 5 [Source:MGI Symbol;Acc:MGI:1858232]	+	gene	Name match	0	1.64851e-12	2.72513e-11	-8.86445	-10.8314	-9.3051	-17.0058	-16.633	-25.2212	-25.0174	-20.5509	-19.4542	-16.183	-20.7076	-17.5758	-12.7017	-21.6682	-15.9913	-20.204	-16.8549	-11.5815	-18.7254	-16.8881	-14.5487	-14.6018	-18.9031	-18.6385	-12.2524	-11.8074	-13.2557	-15.2289	-13.9555	-14.7054	-17.6092	-16.3641	-15.9683	-17.0696	-13.2436	-18.6544
Dhtkd1	2	5896115	5942792	-	Dhtkd1	ENSMUSG00000025815	dehydrogenase E1 and transketolase domain containing 1 [Source:MGI Symbol;Acc:MGI:2445096]	-	gene	Name match	0	0.000311197	0.00165163	7.03313	-10.9081	-17.1381	-14.6479	-13.5769	-26.0176	-19.1226	-17.6103	-9.73444	-16.9794	-21.504	-13.8982	-18.7794	-17.4057	-9.30472	-16.6005	-17.6512	-14.0008	-19.5217	-17.6845	-15.345	-15.3982	-2.48928	-19.4349	-13.0488	-12.6037	-14.0521	-16.0253	-14.7519	-15.5017	-18.4056	-17.1605	-16.7646	-17.866	-19.5139	-14.3446
Upf2	2	5951469	6056703	+	Upf2	ENSMUSG00000043241	UPF2 regulator of nonsense transcripts homolog (yeast) [Source:MGI Symbol;Acc:MGI:2449307]	+	gene	Name match	0	1.64115e-09	1.81398e-08	-7.1819	-11.7582	-14.903	-15.2983	-12.2802	-19.431	-21.4083	-16.7831	-21.4234	-18.1522	-22.6768	-19.5449	-19.9522	-23.6374	-12.8084	-18.3208	-13.5021	-19.9695	-20.6945	-14.3833	-16.5178	-16.571	-16.2609	-20.6077	-14.2216	-13.7765	-15.2249	-17.1981	-15.9247	-16.6745	-19.5784	-18.3333	-12.3592	-19.0388	-20.6867	-20.6236
Usp6nl	2	6322667	6446390	+	Usp6nl	ENSMUSG00000039046	USP6 N-terminal like [Source:MGI Symbol;Acc:MGI:2138893]	+	gene	Name match	0	0.000835099	0.00413265	-2.59352	-12.4568	-16.3164	-17.218	-18.8357	-27.4239	-27.22	-18.6016	-17.0455	-14.2337	-14.3447	-19.7785	-20.1857	-23.8709	-18.1939	-22.4067	-10.7711	-20.203	-20.9281	-19.0908	-16.7513	-16.8045	-21.1058	-15.8818	-14.4551	-14.01	-15.4584	-17.4316	-16.1582	-16.9081	-15.075	-18.5668	-18.1709	-19.2723	-20.9202	-20.8571
Celf2	2	6539694	7509563	-	Celf2	ENSMUSG00000002107	CUGBP, Elav-like family member 2 [Source:MGI Symbol;Acc:MGI:1338822]	-	gene	Name match	0	0	0	-10.8919	-12.0377	-9.44891	-15.5024	-12.9679	-20.777	-24.3108	-17.3974	-17.0577	-14.4495	-18.1143	-16.1877	-23.1564	-20.166	-13.2182	-17.7578	-15.5908	-14.8567	-23.8987	-17.209	-13.712	-13.9507	-24.0765	-23.8119	-17.4258	-16.9807	-10.8848	-15.2502	-12.787	-13.8687	-22.7826	-14.3086	-21.1416	-16.363	-16.2551	-16.1212
Gm37340	2	6940625	6951061	+	Gm37340	ENSMUSG00000103412	predicted gene, 37340 [Source:MGI Symbol;Acc:MGI:5610568]	+	gene	Name match	0	1.43569e-06	1.0599e-05	-7.65888	-17.596	-22.1178	-22.6133	-15.2683	-23.8565	-23.6527	-11.7305	-18.0895	-14.8184	-19.343	-16.2111	-16.6184	-20.3035	-14.6266	-13.5999	-15.4902	-16.6356	-17.3607	-15.5234	-13.184	-13.2372	-17.5385	-17.2739	-10.8878	-10.4427	-11.8911	-13.8642	-12.5908	-13.3407	-16.2446	-14.9994	-14.6036	-15.705	-17.3529	-17.2898
Gm10115	2	6950453	6951680	-	Gm10115	ENSMUSG00000062319	predicted gene 10115 [Source:MGI Symbol;Acc:MGI:3641675]	-	gene	Name match	0	1.58585e-08	1.535e-07	-8.65222	-14.5087	-19.0304	-19.526	-12.181	-20.7692	-20.5654	-10.1921	-15.0022	-11.731	-16.2557	-13.1238	-13.531	-17.2162	-11.5393	-15.752	-12.4029	-13.5483	-14.2734	-12.4361	-10.0967	-10.1498	-14.4511	-14.1865	-7.80045	-7.35537	-8.80374	-10.7769	-9.50352	-10.2534	-13.1573	-11.9121	-11.5163	-12.6176	-14.2656	-14.2024
Gm26565	2	7077265	7081313	+	Gm26565	ENSMUSG00000097774	predicted gene, 26565 [Source:MGI Symbol;Acc:MGI:5477059]	+	gene	Name match	0	8.01873e-13	1.37407e-11	-8.50494	-11.2199	-20.7517	-21.2472	-13.9023	-22.4905	-22.2866	-17.8202	-16.7235	-13.4523	-17.9769	-14.845	-15.2523	-18.9375	-13.2605	-17.4733	-14.1241	-15.2696	-15.9946	-14.1574	-11.8179	-11.8711	-16.1724	-15.9078	-9.5217	-9.07663	-10.525	-12.4982	-11.2248	-11.9746	-14.8785	-13.6334	-13.2375	-14.3389	-15.9868	-15.9237
Atp5c1	2	10056016	10080510	-	Atp5c1	ENSMUSG00000025781	ATP synthase, H+ transporting, mitochondrial F1 complex, gamma polypeptide 1 [Source:MGI Symbol;Acc:MGI:1261437]	-	gene	Name match	0	1.216e-25	8.67309e-24	-5.17105	-13.3528	-23.3485	-23.8441	-16.4991	-7.01992	-24.8835	-20.4171	-19.3203	-16.0491	-20.5738	-13.8305	-17.8491	-21.5343	-15.8574	-20.0701	-16.721	-17.8664	-18.5915	-16.7542	-14.4148	-14.4679	-18.7692	-18.5046	-12.1185	-11.6735	-13.1218	-15.095	-13.8216	-14.5715	-17.4754	-16.2302	-15.8344	-16.9357	-18.5837	-18.5205
Kin	2	10080593	10092806	+	Kin	ENSMUSG00000037262	Kin17 DNA and RNA binding protein [Source:MGI Symbol;Acc:MGI:96676]	+	gene	Name match	0	4.7574e-10	5.63651e-09	-4.72285	-11.2958	-22.3446	-22.8401	-15.4952	-24.0834	-23.8795	-15.0912	-18.3164	-15.0452	-19.5698	-16.4379	-16.8452	-20.5304	-14.8534	-19.0662	-15.717	-16.8625	-17.5875	-15.7503	-13.4108	-13.464	-17.7653	-17.5007	-11.1146	-10.6695	-12.1179	-14.0911	-12.8177	-13.5675	-16.4714	-15.2263	-14.8304	-15.9318	-17.5797	-17.5166
Itih5	2	10153571	10256529	+	Itih5	ENSMUSG00000025780	inter-alpha (globulin) inhibitor H5 [Source:MGI Symbol;Acc:MGI:1925751]	+	gene	Name match	0	1.7189e-14	3.60716e-13	-5.67003	-11.5344	-18.9282	-17.2558	-18.5706	-21.7974	-26.955	-17.2491	-13.7007	-18.1207	-22.6453	-19.5134	-13.886	-23.6058	-17.9289	-22.1417	-18.7925	-19.9379	-20.663	-18.8257	-16.4863	-16.5394	-20.8407	-20.5761	-14.1901	-13.745	-15.1934	-17.1665	-15.8931	-16.643	-19.5469	-13.8278	-13.7539	-19.0072	-20.6552	-20.592
Rbm17	2	11585437	11604153	-	Rbm17	ENSMUSG00000037197	RNA binding motif protein 17 [Source:MGI Symbol;Acc:MGI:1924188]	-	gene	Name match	0	0.00237725	0.0108459	-1.84369	-11.1268	-14.57	-15.7493	-16.111	-24.6992	-24.4953	-20.0289	-18.9322	-15.661	-20.1856	-17.0538	-17.461	-21.1462	-15.4692	-19.682	-16.3328	-17.4783	-18.2034	-16.3661	-14.0266	-14.0798	-18.3811	-18.1165	-11.7304	-11.2853	-12.7337	-14.7069	-13.4335	-14.1833	-17.0872	-15.8421	-15.4462	-16.5476	-18.1955	-18.1324
Il15ra	2	11705290	11734317	+	Il15ra	ENSMUSG00000023206	interleukin 15 receptor, alpha chain [Source:MGI Symbol;Acc:MGI:104644]	+	gene	Name match	0	2.03022e-10	2.5407e-09	-8.63008	-11.8753	-23.5935	-24.089	-16.7441	-25.3323	-25.1284	-20.662	-19.5653	-16.2941	-20.8187	-17.6868	-18.0941	-21.7793	-16.1023	-20.3151	-16.9659	-18.1114	-18.8365	-16.9992	-14.6597	-14.7129	-19.0142	-18.7496	-12.3635	-11.9184	-13.3668	-15.34	-14.0666	-14.8164	-17.7203	-16.4752	-16.0793	-17.1807	-18.8286	-18.7655
Fbh1	2	11742573	11777582	-	Fbh1	ENSMUSG00000058594	F-box DNA helicase 1 [Source:MGI Symbol;Acc:MGI:1354699]	-	gene	Name match	0	0.000571276	0.00291105	-5.38542	-11.539	-15.7345	-24.3593	-17.0144	-25.6026	-25.3987	-20.9323	-19.8356	-16.5644	-21.089	-17.9572	-18.3644	-22.0496	-16.3727	-20.5854	-17.2363	-18.3817	-19.1068	-17.2695	-14.9301	-9.87702	-19.2845	-19.0199	-12.6338	-12.1888	-13.6371	-15.6103	-14.3369	-10.8473	-17.9906	-16.7455	-16.3497	-17.451	-19.0989	-19.0358
Ankrd16	2	11777876	11790329	+	Ankrd16	ENSMUSG00000047909	ankyrin repeat domain 16 [Source:MGI Symbol;Acc:MGI:2444796]	+	gene	Name match	0	0.00831982	0.0347548	-4.86418	-12.1753	-18.8987	-22.8682	-15.5232	-24.1114	-23.9076	-19.4412	-18.3444	-15.0733	-19.5979	-16.466	-16.8733	-20.5584	-14.8815	-19.0943	-15.7451	-16.8905	-17.6156	-15.7783	-13.4389	-13.4921	-17.7934	-17.5288	-11.1427	-10.6976	-12.146	-14.1191	-12.8457	-13.5956	-16.4995	-15.2543	-14.8585	-15.9599	-17.6078	-17.5447
Itga8	2	12106632	12301922	-	Itga8	ENSMUSG00000026768	integrin alpha 8 [Source:MGI Symbol;Acc:MGI:109442]	-	gene	Name match	0	0.000628079	0.00317358	-6.39776	-11.3661	-17.0292	-17.2053	-14.8828	-22.6825	-27.8785	-16.6308	-17.2092	-19.0442	-23.5688	-20.437	-20.8442	-24.5294	-18.8524	-23.0652	-19.716	-20.8615	-21.5866	-19.7493	-12.1286	-17.463	-21.7643	-21.4997	-15.1136	-14.6685	-16.1169	-18.0901	-16.8167	-17.5666	-20.4704	-19.2253	-18.8294	-19.9308	-21.5787	-15.2138
Mindy3	2	12347263	12419470	-	Mindy3	ENSMUSG00000026767	MINDY lysine 48 deubiquitinase 3 [Source:MGI Symbol;Acc:MGI:1914210]	-	gene	Name match	0	3.29228e-07	2.67158e-06	-7.84124	-11.775	-16.5226	-16.2744	-18.0588	-26.647	-26.4431	-17.3653	-20.88	-17.6088	-22.1334	-19.0016	-19.4088	-23.094	-17.4171	-21.6298	-18.2806	-19.4261	-20.1512	-18.3139	-15.9744	-16.0276	-20.3289	-20.0643	-13.6782	-13.2331	-14.6815	-16.6547	-15.3813	-16.1312	-19.035	-13.1143	-17.3941	-18.4954	-20.1433	-20.0802
Pter	2	12924041	13003455	+	Pter	ENSMUSG00000026730	phosphotriesterase related [Source:MGI Symbol;Acc:MGI:107372]	+	gene	Name match	0	1.00337e-06	7.54668e-06	-7.24186	-11.4648	-14.4745	-16.1506	-11.8943	-26.7842	-26.5804	-15.6044	-21.0172	-17.7461	-22.2707	-19.1388	-15.0017	-23.2312	-17.5543	-21.7671	-18.4179	-19.5633	-20.2884	-18.4511	-16.1117	-16.1649	-20.4662	-14.8796	-13.8155	-13.3704	-14.8188	-11.6857	-15.5185	-16.2684	-13.6627	-17.9271	-17.5313	-11.9888	-16.0411	-20.2175
Rsu1	2	13076821	13271415	-	Rsu1	ENSMUSG00000026727	Ras suppressor protein 1 [Source:MGI Symbol;Acc:MGI:103040]	-	gene	Name match	0	8.9518e-26	6.43644e-24	-6.01047	-12.4601	-17.6204	-15.8515	-14.1276	-28.0772	-27.8734	-23.407	-22.3102	-12.8647	-23.5637	-20.4318	-15.5171	-24.5242	-13.9949	-23.0601	-19.7109	-20.8563	-21.5814	-19.7441	-17.4047	-17.4579	-21.7591	-21.4945	-15.1085	-14.6634	-7.73094	-18.0849	-9.63717	-17.5614	-15.9914	-19.2201	-13.28	-19.9257	-21.5736	-16.9661
Gm13270	2	13271601	13325827	+	Gm13270	ENSMUSG00000086358	predicted gene 13270 [Source:MGI Symbol;Acc:MGI:3651704]	+	gene	Name match	0	0.0036508	0.0161712	-5.97601	-14.2977	-18.2556	-24.9906	-17.6456	-26.2338	-26.03	-21.5636	-20.4668	-17.1957	-21.7203	-18.5884	-18.9957	-22.6808	-17.0039	-21.2167	-17.8675	-19.0129	-19.738	-17.9007	-15.5613	-15.6145	-19.9158	-19.6512	-13.2651	-12.82	-14.2684	-16.2415	-14.9681	-15.718	-14.3824	-17.3767	-16.9809	-18.0823	-19.7302	-19.6671
Trdmt1	2	13509014	13544668	-	Trdmt1	ENSMUSG00000026723	tRNA aspartic acid methyltransferase 1 [Source:MGI Symbol;Acc:MGI:1274787]	-	gene	Name match	0	5.03785e-07	3.95113e-06	-4.99336	-12.4749	-17.9833	-24.3857	-10.0686	-25.6289	-21.1856	-13.9612	-19.8619	-16.5908	-21.1154	-11.4917	-12.9534	-16.4321	-10.2928	-20.6118	-17.2626	-10.8298	-13.6592	-17.2958	-9.2498	-15.0096	-19.3108	-19.0462	-12.6602	-12.2151	-13.6635	-9.78419	-8.65665	-9.50167	-18.017	-11.2623	-10.7977	-12.0034	-19.1253	-12.4024
Vim	2	13573927	13582826	+	Vim	ENSMUSG00000026728	vimentin [Source:MGI Symbol;Acc:MGI:98932]	+	gene	Name match	0	6.55787e-24	4.00345e-22	-5.84326	-13.4068	-21.8879	-22.3834	-15.0385	-23.6267	-23.4229	-18.9564	-17.8597	-6.21736	-19.1131	-14.2443	-16.3885	-20.0737	-9.60091	-18.6095	-15.2604	-16.4058	-13.657	-15.2936	-12.9542	-13.0073	-17.3086	-17.044	-10.6579	-10.2129	-11.6612	-13.6344	-7.88708	-13.1109	-16.0148	-9.81025	-14.3738	-15.4751	-17.1231	-17.0599
Stam	2	14074098	14149634	+	Stam	ENSMUSG00000026718	signal transducing adaptor molecule (SH3 domain and ITAM motif) 1 [Source:MGI Symbol;Acc:MGI:1329014]	+	gene	Name match	0	0.00143871	0.00681191	-3.42549	-12.3108	-12.271	-18.702	-11.0892	-21.6058	-26.5082	-22.0418	-16.2695	-17.6738	-22.1985	-19.0666	-19.4738	-23.159	-17.4821	-21.6948	-18.3457	-14.6387	-20.2162	-18.3789	-16.0395	-16.0926	-16.072	-16.6554	-13.7432	-13.2982	-14.7465	-16.7197	-15.4463	-16.1962	-19.1001	-17.8549	-12.9148	-18.5604	-20.2084	-20.1452
Nsun6	2	14995131	15055069	-	Nsun6	ENSMUSG00000026707	NOL1/NOP2/Sun domain family member 6 [Source:MGI Symbol;Acc:MGI:1921705]	-	gene	Name match	0	1.29031e-06	9.59337e-06	-7.2363	-11.4035	-15.2563	-17.9607	-17.7901	-26.3783	-20.7745	-16.3081	-20.6113	-17.3402	-21.8648	-18.7329	-19.1402	-22.8253	-17.1484	-21.3612	-18.012	-19.1574	-19.8825	-18.0452	-15.7058	-15.7589	-20.0602	-19.7956	-13.4096	-12.9645	-14.4129	-16.386	-15.1126	-15.8625	-18.7664	-17.5212	-13.2729	-18.2267	-19.8747	-19.8115
Arl5b	2	15049395	15082456	+	Arl5b	ENSMUSG00000017418	ADP-ribosylation factor-like 5B [Source:MGI Symbol;Acc:MGI:1923119]	+	gene	Name match	0	0.00014296	0.000798007	-5.73905	-12.9989	-23.7812	-24.2767	-9.73541	-25.52	-25.3162	-16.4498	-19.753	-16.4818	-21.0064	-17.8746	-18.2818	-21.967	-16.2901	-20.5028	-17.1537	-18.2991	-19.0242	-17.1869	-14.8475	-14.9006	-19.2019	-18.9373	-12.5512	-12.1062	-13.5545	-15.5277	-14.2543	-15.0042	-17.9081	-16.6629	-16.2671	-17.3684	-19.0163	-18.9532
Gm38257	2	15056713	15059473	+	Gm38257	ENSMUSG00000102258	predicted gene, 38257 [Source:MGI Symbol;Acc:MGI:5611485]	+	gene	Name match	0	0.000251922	0.00135625	-3.69889	-15.6776	-20.1993	-20.6948	-13.3499	-21.9381	-21.7342	-17.2678	-16.1711	-12.8999	-17.4245	-14.2927	-14.6999	-18.3851	-12.7082	-16.9209	-13.5718	-14.7172	-15.4423	-13.605	-11.2656	-11.3187	-15.62	-15.3554	-8.96933	-8.52425	-9.97262	-11.9458	-10.6724	-11.4223	-14.3261	-13.081	-12.6852	-13.7865	-15.4344	-15.3713
Plxdc2	2	16356304	16755839	+	Plxdc2	ENSMUSG00000026748	plexin domain containing 2 [Source:MGI Symbol;Acc:MGI:1914698]	+	gene	Name match	0	1.20066e-28	1.1305e-26	-6.1223	-9.23748	-19.7649	-16.5568	-10.4294	-20.7932	-22.5498	-16.6929	-14.8124	-20.0769	-20.8646	-21.4697	-14.2251	-18.3877	-14.4112	-24.0979	-20.7487	-15.0007	-22.6193	-14.8226	-13.0051	-18.4957	-22.797	-14.751	-16.1463	-15.7012	-17.1496	-19.1228	-11.916	-18.5993	-21.5031	-12.146	-19.8621	-20.9635	-14.372	-15.9869
Mllt10	2	18055237	18212388	+	Mllt10	ENSMUSG00000026743	myeloid/lymphoid or mixed-lineage leukemia; translocated to, 10 [Source:MGI Symbol;Acc:MGI:1329038]	+	gene	Name match	0	5.43896e-07	4.24793e-06	-3.78609	-12.4737	-16.3684	-14.9411	-10.143	-27.7689	-27.5651	-15.6429	-12.7758	-11.5235	-15.8842	-13.7236	-15.0933	-20.157	-12.7723	-17.9559	-19.4026	-16.3085	-16.9512	-14.2838	-10.922	-17.1495	-21.4508	-21.1862	-14.8002	-14.3551	-15.8034	-17.7766	-12.5439	-10.3197	-20.157	-13.2363	-18.516	-19.6173	-21.2653	-14.5266
Dnajc1	2	18195654	18392830	-	Dnajc1	ENSMUSG00000026740	DnaJ heat shock protein family (Hsp40) member C1 [Source:MGI Symbol;Acc:MGI:103268]	-	gene	Name match	0	9.85007e-16	2.44132e-14	-9.05192	-10.8164	-14.9724	-11.0168	-13.6836	-21.518	-27.8924	-17.3198	-22.3293	-14.3825	-23.5827	-15.8394	-16.7992	-24.5432	-13.7601	-23.0791	-19.7299	-20.8753	-21.6004	-19.7631	-17.4237	-17.4769	-21.7782	-21.5136	-15.1275	-14.6824	-16.1308	-18.1039	-11.0638	-10.9206	-20.4843	-19.2392	-18.8433	-19.9447	-21.5926	-21.5295
Commd3	2	18672384	18676231	+	Commd3	ENSMUSG00000051154	COMM domain containing 3 [Source:MGI Symbol;Acc:MGI:88218]	+	gene	Name match	0	1.17034e-08	1.15256e-07	-3.5263	-16.1565	-15.7189	-21.1737	-13.8288	-22.417	-22.2132	-17.7467	-16.65	-13.3788	-17.9035	-14.7716	-15.1788	-18.864	-13.1871	-17.3998	-14.0507	-15.1961	-15.9212	-14.0839	-11.7445	-11.7976	-16.0989	-15.8343	-9.44824	-9.00317	-10.4515	-12.4247	-11.1513	-11.9012	-14.8051	-13.5599	-13.1641	-14.2654	-15.9134	-15.8502
Bmi1	2	18677018	18686629	+	Bmi1	ENSMUSG00000026739	Bmi1 polycomb ring finger oncogene [Source:MGI Symbol;Acc:MGI:88174]	+	gene	Name match	0	7.49457e-07	5.72893e-06	-9.60552	-12.4672	-15.2771	-22.4945	-10.6052	-23.7377	-23.5339	-19.0675	-17.9707	-9.74021	-19.2242	-16.0923	-16.4996	-20.1847	-14.5078	-18.7206	-15.3714	-16.5168	-17.2419	-15.4046	-13.0652	-13.1184	-17.4197	-12.8331	-10.769	-10.3239	-11.7723	-13.7454	-12.472	-13.2219	-16.1258	-14.8806	-14.4848	-15.5862	-17.2341	-17.171
Armc3	2	19199302	19310241	+	Armc3	ENSMUSG00000037683	armadillo repeat containing 3 [Source:MGI Symbol;Acc:MGI:1918132]	+	gene	Name match	0	0.0056943	0.0244795	6.13147	-12.6013	-5.70369	-17.3635	-14.3564	-27.2665	-27.0627	-22.5963	-21.4995	-18.2284	-16.5566	-16.0097	-20.0284	-23.7135	-14.0772	-22.2494	-18.9002	-16.1932	-20.7707	-18.9334	-16.594	-16.6472	-16.7964	-15.625	-14.2978	-13.8527	-15.3011	-17.2742	-16.0008	-12.5987	-19.6546	-18.4094	-18.0136	-19.115	-20.7629	-20.6998
Msrb2	2	19371440	19394976	+	Msrb2	ENSMUSG00000023094	methionine sulfoxide reductase B2 [Source:MGI Symbol;Acc:MGI:1923717]	+	gene	Name match	0	1.12645e-05	7.42022e-05	-6.55504	-12.0626	-19.554	-23.7865	-16.4416	-25.0298	-24.8259	-20.3595	-19.2628	-15.9916	-20.5162	-17.3843	-17.7916	-21.4768	-15.7998	-20.0126	-16.6634	-17.8089	-12.7381	-16.6966	-14.3572	-14.4104	-18.7117	-18.4471	-12.061	-11.6159	-13.0643	-15.0375	-13.7641	-14.5139	-17.4178	-16.1727	-15.7768	-16.8782	-18.5261	-18.463
Arhgap21	2	20847919	20968881	-	Arhgap21	ENSMUSG00000036591	Rho GTPase activating protein 21 [Source:MGI Symbol;Acc:MGI:1918685]	-	gene	Name match	0	7.95309e-20	3.1416e-18	-8.07401	-11.4184	-25.6525	-19.2546	-12.9787	-16.0063	-18.093	-14.1055	-16.665	-14.6162	-13.5862	-12.3085	-15.9137	-10.786	-12.6875	-13.454	-15.7031	-20.1704	-20.8955	-15.2058	-16.7188	-6.51534	-17.7513	-15.1972	-14.4226	-13.9775	-15.4258	-17.399	-16.1256	-16.8755	-14.9835	-18.5342	-9.78671	-9.1899	-17.5657	-14.3327
Pdss1	2	22895522	22940266	+	Pdss1	ENSMUSG00000026784	prenyl (solanesyl) diphosphate synthase, subunit 1 [Source:MGI Symbol;Acc:MGI:1889278]	+	gene	Name match	0	0.000193299	0.00106136	-5.92093	-10.978	-18.9365	-9.85561	-9.72451	-25.9566	-25.7527	-13.6667	-15.0834	-11.3741	-15.5096	-12.5153	-14.2445	-22.4036	-10.8467	-16.4655	-17.5902	-12.9112	-19.4607	-17.6234	-10.6726	-8.57047	-15.1645	-19.3739	-12.9878	-12.5427	-13.9911	-15.9643	-14.6909	-15.4407	-18.3446	-17.0995	-12.3037	-17.805	-14.1716	-14.1934
Abi1	2	22940073	23040241	-	Abi1	ENSMUSG00000058835	abl-interactor 1 [Source:MGI Symbol;Acc:MGI:104913]	-	gene	Name match	0	1.36183e-06	1.00893e-05	-3.03355	-11.3165	-19.6434	-17.3103	-10.5272	-15.4819	-20.8326	-14.496	-14.4587	-12.2286	-16.8389	-12.6636	-12.3196	-17.5315	-10.6183	-16.7801	-18.7529	-11.4984	-13.2915	-18.7861	-10.2947	-9.80865	-20.8011	-14.7406	-14.1504	-13.7054	-15.1537	-17.1269	-9.53157	-16.6034	-19.5072	-12.3027	-12.0704	-13.261	-13.2836	-13.2711
Yme1l1	2	23156369	23199260	+	Yme1l1	ENSMUSG00000026775	YME1-like 1 (S. cerevisiae) [Source:MGI Symbol;Acc:MGI:1351651]	+	gene	Name match	0	0.00239499	0.0109156	-2.29095	-10.8106	-15.6873	-9.68845	-11.9074	-25.8955	-20.5855	-14.681	-13.5672	-11.7985	-21.382	-12.8502	-12.8907	-22.3425	-11.4692	-20.8784	-17.5292	-18.6746	-19.3997	-17.5624	-10.9835	-11.2173	-19.5775	-14.2067	-12.9268	-12.4817	-13.9301	-15.9032	-14.6298	-15.3797	-18.2836	-17.0384	-11.2427	-17.744	-19.3919	-19.3288
Hnmt	2	24002910	24049394	-	Hnmt	ENSMUSG00000026986	histamine N-methyltransferase [Source:MGI Symbol;Acc:MGI:2153181]	-	gene	Name match	0	0.00712044	0.030191	-1.59401	-10.9056	-24.2728	-14.2665	-13.0235	-26.0116	-25.8077	-21.3413	-13.0926	-16.9734	-21.498	-18.3662	-18.7734	-22.4586	-16.7817	-20.9944	-17.6453	-18.7907	-19.5158	-17.6785	-15.3391	-15.3922	-19.6935	-19.4289	-13.0428	-12.5978	-14.0461	-16.0193	-14.7459	-15.4958	-18.3996	-17.1545	-16.7587	-17.86	-19.5079	-19.4448
Ehmt1	2	24789928	24919614	-	Ehmt1	ENSMUSG00000036893	euchromatic histone methyltransferase 1 [Source:MGI Symbol;Acc:MGI:1924933]	-	gene	Name match	0	2.61565e-13	4.72556e-12	-4.40056	-11.8055	-17.3018	-16.9621	-13.3253	-27.4918	-21.0915	-16.5402	-21.7248	-14.4943	-18.3027	-19.8464	-15.7797	-23.9388	-18.2619	-22.4746	-19.1255	-14.8335	-20.996	-14.6847	-16.8193	-16.8724	-21.1737	-20.9091	-14.523	-14.078	-15.5263	-17.4995	-16.2261	-11.576	-19.8798	-14.4827	-13.2795	-19.3402	-16.5142	-20.925
Zmynd19	2	24949792	24962075	+	Zmynd19	ENSMUSG00000026974	zinc finger, MYND domain containing 19 [Source:MGI Symbol;Acc:MGI:1914437]	+	gene	Name match	0	0.0082945	0.0346693	-1.67805	-11.3392	-16.1134	-14.8954	-15.5034	-24.0916	-18.7358	-13.1401	-18.3246	-15.0534	-19.578	-16.4462	-16.8534	-20.5386	-9.50022	-19.0744	-15.7253	-16.8707	-17.5958	-15.7585	-13.4191	-13.4722	-17.7735	-17.5089	-11.1228	-10.6778	-12.1261	-14.0993	-12.8259	-13.5758	-16.4797	-15.2345	-14.8387	-10.5786	-17.588	-17.5248
Dph7	2	24962400	24972163	+	Dph7	ENSMUSG00000026975	diphthamine biosynethesis 7 [Source:MGI Symbol;Acc:MGI:1914478]	+	gene	Name match	0	6.62945e-10	7.72336e-09	-8.60961	-13.0999	-16.315	-14.1363	-15.1722	-19.0848	-23.5565	-19.0901	-17.9934	-14.7222	-19.2468	-16.1149	-11.5628	-20.2074	-14.5304	-18.7432	-15.394	-16.5395	-17.2646	-15.4273	-13.0878	-13.141	-17.4423	-17.1777	-10.7916	-10.3465	-11.7949	-13.7681	-12.4947	-13.2445	-16.1484	-14.9033	-14.5074	-15.6088	-17.2567	-17.1936
Mrpl41	2	24974117	24975098	-	Mrpl41	ENSMUSG00000036850	mitochondrial ribosomal protein L41 [Source:MGI Symbol;Acc:MGI:1333816]	-	gene	Name match	0	3.41365e-08	3.16724e-07	-3.41684	-14.1862	-18.7079	-19.2034	-11.8585	-3.98551	-20.2428	-15.7764	-14.6797	-11.4085	-15.9331	-12.8013	-13.2085	-16.8937	-11.2168	-15.4295	-12.0804	-13.2258	-13.9509	-12.1136	-9.77416	-9.82732	-14.1286	-13.864	-7.47793	-7.03286	-8.48122	-10.4544	-9.181	-9.93087	-12.8347	-11.5896	-11.1938	-12.2951	-13.943	-13.8799
Pnpla7	2	24976033	25054057	+	Pnpla7	ENSMUSG00000036833	patatin-like phospholipase domain containing 7 [Source:MGI Symbol;Acc:MGI:2385325]	+	gene	Name match	0	0.00135211	0.00643527	-2.02589	-11.7352	-16.1606	-16.5953	-12.9311	-13.7644	-20.7305	-16.6511	-20.9918	-17.7206	-22.2452	-19.1133	-19.5206	-18.5302	-17.5288	-21.7416	-18.3924	-19.5379	-20.2629	-12.9882	-16.0862	-9.70198	-20.4407	-20.1761	-13.79	-13.3449	-14.7933	-16.7665	-15.4931	-16.2429	-19.1468	-17.9017	-12.7689	-18.6072	-20.2551	-13.6306
Nsmf	2	25054355	25062881	+	Nsmf	ENSMUSG00000006476	NMDA receptor synaptonuclear signaling and neuronal migration factor [Source:MGI Symbol;Acc:MGI:1861755]	+	gene	Name match	0	0.00135928	0.00646336	-2.53868	-10.9429	-21.8262	-11.9361	-14.9767	-19.9535	-23.3611	-18.8947	-17.7979	-14.5268	-19.0514	-15.9195	-16.3268	-20.0119	-14.335	-18.5478	-15.1986	-16.344	-17.0691	-15.2318	-12.8924	-12.9456	-17.2469	-16.9823	-10.5962	-10.1511	-11.5995	-13.5726	-12.2992	-13.0491	-15.953	-14.7078	-14.312	-15.4134	-17.0613	-16.9982
Nelfb	2	25199712	25211489	-	Nelfb	ENSMUSG00000013465	negative elongation factor complex member B [Source:MGI Symbol;Acc:MGI:1931035]	-	gene	Name match	0	0.00022429	0.0012206	-3.71076	-12.9179	-22.2921	-22.7877	-15.4427	-19.124	-17.7924	-10.5504	-18.2639	-14.9928	-19.5174	-16.3855	-16.7928	-20.4779	-14.801	-19.0138	-15.6646	-16.81	-17.5351	-15.6978	-13.3584	-13.4115	-17.7128	-17.4482	-11.0622	-10.6171	-12.0655	-14.0386	-12.7652	-13.5151	-16.419	-15.1738	-14.778	-15.8793	-17.5273	-17.4641
Fam166a	2	25218745	25222280	+	Fam166a	ENSMUSG00000026969	family with sequence similarity 166, member A [Source:MGI Symbol;Acc:MGI:3605773]	+	gene	Name match	0	6.83374e-10	7.94836e-09	-3.52169	-16.0345	-20.5562	-21.0518	-13.7068	-7.18628	-22.0912	-17.6248	-16.528	-13.2568	-17.7815	-14.6496	-15.0568	-18.742	-13.0651	-17.2779	-13.9287	-15.0741	-15.7992	-13.9619	-11.6225	-11.6756	-15.9769	-15.7123	-9.32625	-8.88118	-10.3295	-12.3027	-11.0293	-11.7792	-14.6831	-13.4379	-13.0421	-14.1434	-15.7914	-15.7282
Tubb4b	2	25222160	25224702	-	Tubb4b	ENSMUSG00000036752	tubulin, beta 4B class IVB [Source:MGI Symbol;Acc:MGI:1915472]	-	gene	Name match	0	2.17384e-12	3.53606e-11	-4.54407	-8.42961	-20.0807	-13.1858	-13.2312	-3.17873	-21.6156	-17.1492	-16.0524	-12.7813	-17.3059	-14.174	-14.5813	-18.2664	-12.5895	-16.8023	-13.4531	-14.5985	-15.3236	-13.4863	-11.1469	-11.2001	-15.5013	-15.2367	-8.85067	-8.40559	-9.85396	-11.8271	-10.5537	-11.3036	-14.2075	-12.9623	-12.5665	-13.6679	-15.3158	-15.2526
Ndor1	2	25244821	25256022	-	Ndor1	ENSMUSG00000006471	NADPH dependent diflavin oxidoreductase 1 [Source:MGI Symbol;Acc:MGI:1926047]	-	gene	Name match	0	0.00848284	0.0353404	-1.76951	-17.698	-13.8294	-22.7153	-15.3704	-23.9586	-23.7547	-19.2883	-18.1916	-14.9204	-19.445	-16.3132	-16.7204	-20.4056	-11.1172	-18.9414	-15.5922	-16.7377	-17.4628	-15.6255	-13.286	-13.3392	-17.6405	-17.3759	-10.9898	-10.5447	-11.9931	-13.9663	-12.6929	-13.4428	-16.3466	-15.1015	-14.7057	-15.807	-17.4549	-17.3918
Anapc2	2	25272478	25285915	+	Anapc2	ENSMUSG00000026965	anaphase promoting complex subunit 2 [Source:MGI Symbol;Acc:MGI:2139135]	+	gene	Name match	0	9.01468e-09	9.0327e-08	-3.6915	-10.5894	-22.4824	-15.919	-11.159	-24.2212	-24.0173	-19.5509	-18.4542	-15.183	-19.7076	-16.5757	-16.983	-20.6681	-14.9912	-19.204	-15.8548	-17.0002	-17.7253	-15.888	-13.5486	-13.6018	-17.9031	-17.6385	-11.2524	-10.8073	-12.2557	-14.2288	-12.9555	-13.7053	-16.6092	-10.5682	-14.9682	-16.0696	-17.7175	-17.6544
Uap1l1	2	25359889	25365682	-	Uap1l1	ENSMUSG00000026956	UDP-N-acteylglucosamine pyrophosphorylase 1- like 1 [Source:MGI Symbol;Acc:MGI:2443318]	-	gene	Name match	0	0.00489286	0.0212446	-2.85714	-11.5949	-21.2687	-21.7642	-14.4193	-23.0075	-22.8036	-13.8633	-17.2405	-9.11685	-13.8183	-15.362	-15.7693	-19.4545	-13.7775	-17.9903	-14.6411	-15.7866	-16.5116	-14.6743	-12.3349	-12.3881	-16.6894	-16.4248	-10.0387	-9.59362	-11.042	-13.0152	-11.7418	-12.4916	-15.3955	-14.1504	-13.7545	-14.8559	-16.5038	-16.4407
Entpd2	2	25395874	25401321	+	Entpd2	ENSMUSG00000015085	ectonucleoside triphosphate diphosphohydrolase 2 [Source:MGI Symbol;Acc:MGI:1096863]	+	gene	Name match	0	0	0	-11.7074	-16.6581	-21.1798	-21.6754	-14.3304	-22.9186	-22.7148	-18.2484	-17.1516	-13.8805	-18.4051	-15.2732	-15.6805	-19.3656	-13.6887	-17.9015	-14.5523	-15.6977	-16.4228	-14.5855	-12.2461	-12.2993	-16.6005	-16.3359	-9.94986	-9.50479	-10.9532	-12.9263	-11.6529	-12.4028	-15.3067	-14.0615	-13.6657	-14.7671	-16.415	-16.3518
Npdc1	2	25399351	25409494	+	Npdc1	ENSMUSG00000015094	neural proliferation, differentiation and control 1 [Source:MGI Symbol;Acc:MGI:1099802]	+	gene	Name match	0	0	0	-10.6002	-12.7025	-22.0767	-14.1302	-9.9878	-20.204	-17.0502	-14.4696	-18.0485	-14.7773	-19.3019	-16.17	-16.5773	-20.2625	-14.5855	-18.7983	-15.4491	-16.5946	-17.3196	-15.4823	-13.1429	-13.1961	-17.4974	-17.2328	-10.8467	-10.4016	-11.85	-13.8232	-12.5498	-13.2996	-16.2035	-9.38009	-14.5625	-15.6639	-10.9899	-17.2487
Abca2	2	25428703	25448540	+	Abca2	ENSMUSG00000026944	ATP-binding cassette, sub-family A (ABC1), member 2 [Source:MGI Symbol;Acc:MGI:99606]	+	gene	Name match	0	0.000164806	0.000913218	-5.39036	-9.82366	-13.4045	-23.5398	-11.795	-21.4612	-20.4272	-13.621	-19.0161	-15.7449	-15.1175	-17.1377	-12.9335	-21.2301	-10.4012	-15.2216	-16.4168	-17.5622	-18.2873	-16.45	-14.1106	-14.1637	-18.465	-18.2004	-11.8143	-11.3693	-12.8176	-14.7908	-13.5174	-14.2673	-17.1711	-15.926	-15.5302	-16.6315	-18.2794	-18.2163
Paxx	2	25455141	25461094	-	Paxx	ENSMUSG00000047617	non-homologous end joining factor [Source:MGI Symbol;Acc:MGI:2442831]	-	gene	Name match	0	1.09965e-06	8.24124e-06	-3.47391	-16.7862	-21.308	-21.8035	-14.4586	-6.05566	-22.8429	-18.3765	-17.2798	-14.0086	-18.5332	-15.4013	-15.8086	-19.4938	-13.8168	-18.0296	-14.6804	-15.8259	-16.5509	-14.7136	-12.3742	-12.4274	-16.7287	-16.4641	-10.078	-9.63292	-11.0813	-13.0545	-11.7811	-12.5309	-15.4348	-14.1897	-13.7938	-14.8952	-16.5431	-16.48
Ptgds	2	25466709	25470046	-	Ptgds	ENSMUSG00000015090	prostaglandin D2 synthase (brain) [Source:MGI Symbol;Acc:MGI:99261]	-	gene	Name match	0	0.000986152	0.00481126	6.68283	-4.30049	-20.4731	-20.9686	-13.6237	-4.60996	-22.008	-12.9973	-16.4449	-13.1737	-17.6983	-14.5665	-14.9737	-18.6589	-12.9819	-17.1947	-13.8455	-14.991	-15.7161	-13.8788	-11.5393	-11.5925	-15.8938	-15.6292	-9.24312	-8.79805	-10.2464	-12.2196	-10.9462	-11.6961	-14.5999	-13.3548	-12.9589	-14.0603	-15.7082	-15.6451
C8g	2	25498651	25501719	-	C8g	ENSMUSG00000015083	complement component 8, gamma polypeptide [Source:MGI Symbol;Acc:MGI:88237]	-	gene	Name match	0	0.0111668	0.0456404	-5.20089	-11.1546	-20.3519	-20.8474	-8.89104	-22.0907	-21.8868	-17.4204	-16.3237	-13.0525	-17.5771	-14.4452	-14.8525	-18.5377	-12.8607	-17.0735	-13.7243	-14.8698	-15.5948	-13.7576	-11.4181	-11.4713	-15.7726	-15.508	-9.1219	-8.67683	-10.1252	-12.0984	-10.825	-11.5748	-14.4787	-13.2336	-12.8377	-13.9391	-15.587	-15.5239
Fbxw5	2	25500750	25505471	+	Fbxw5	ENSMUSG00000015095	F-box and WD-40 domain protein 5 [Source:MGI Symbol;Acc:MGI:1354731]	+	gene	Name match	0	0.000236561	0.00127936	-7.05998	-11.7762	-20.9735	-21.469	-14.1241	-22.7123	-22.5084	-18.042	-16.9453	-13.6741	-18.1987	-15.0669	-15.4741	-19.1593	-13.4824	-17.6951	-14.346	-15.4914	-16.2165	-14.3792	-12.0398	-12.0929	-16.3942	-16.1296	-9.74353	-9.29846	-10.7468	-12.72	-11.4466	-12.1965	-15.1003	-13.8552	-13.4594	-14.5607	-16.2086	-16.1455
Edf1	2	25557847	25562082	+	Edf1	ENSMUSG00000015092	endothelial differentiation-related factor 1 [Source:MGI Symbol;Acc:MGI:1891227]	+	gene	Name match	0	2.22384e-08	2.11345e-07	-3.19253	-10.2362	-20.8168	-21.3123	-13.9674	-5.17535	-22.3518	-17.8853	-16.7886	-13.5174	-18.042	-14.9102	-15.3174	-19.0026	-13.3257	-17.5384	-14.1893	-15.3347	-16.0598	-14.2225	-11.8831	-11.9362	-16.2375	-15.9729	-9.58684	-9.14176	-10.5901	-12.5633	-11.2899	-12.0398	-14.9437	-13.6985	-13.3027	-14.404	-16.0519	-15.9888
Mamdc4	2	25563115	25574845	-	Mamdc4	ENSMUSG00000026941	MAM domain containing 4 [Source:MGI Symbol;Acc:MGI:2685841]	-	gene	Name match	0	3.4846e-15	7.98072e-14	-5.50625	-9.78607	-22.2864	-22.7819	-11.7	-24.0252	-23.8213	-19.3549	-18.2582	-14.987	-19.5116	-16.3797	-16.787	-20.4722	-14.7952	-19.008	-15.6588	-16.8043	-17.5293	-15.692	-13.3526	-13.4058	-17.7071	-17.4425	-11.0564	-10.6113	-12.0597	-9.63292	-12.7595	-13.5093	-16.4132	-15.1681	-14.7722	-15.8736	-17.5215	-17.4584
Phpt1	2	25573430	25575224	-	Phpt1	ENSMUSG00000036504	phosphohistidine phosphatase 1 [Source:MGI Symbol;Acc:MGI:1922704]	-	gene	Name match	0	2.35125e-11	3.34466e-10	-4.50907	-15.0563	-19.5781	-20.0736	-12.7287	-21.3169	-21.113	-16.6466	-15.5499	-12.2787	-16.8033	-13.6715	-14.0787	-17.7639	-5.15359	-16.2997	-12.9505	-14.096	-14.8211	-12.9838	-10.6443	-10.6975	-14.9988	-14.7342	-8.34812	-7.90305	-9.35141	-11.3246	-10.0512	-10.8011	-13.7049	-12.4598	-12.0639	-13.1653	-14.8132	-14.7501
A230005M16Rik	2	25705850	25709716	-	A230005M16Rik	ENSMUSG00000087612	RIKEN cDNA A230005M16 gene [Source:MGI Symbol;Acc:MGI:3603401]	-	gene	Name match	0	1.85522e-09	2.03731e-08	-3.79027	-16.1636	-20.6853	-21.1809	-13.8359	-5.20211	-22.2203	-17.7539	-16.6571	-13.3859	-17.9106	-14.7787	-15.1859	-18.8711	-13.1942	-17.4069	-14.0578	-15.2032	-15.9283	-14.091	-11.7516	-11.8047	-16.106	-15.8414	-9.45535	-9.01028	-10.4586	-12.4318	-11.1584	-11.9083	-14.8122	-13.567	-13.1712	-14.2725	-15.9205	-15.8573
Bmyc	2	25706739	25707721	+	Bmyc	ENSMUSG00000049086	brain expressed myelocytomatosis oncogene [Source:MGI Symbol;Acc:MGI:88184]	+	gene	Name match	0	4.82765e-10	5.71213e-09	-3.9773	-14.1876	-18.7094	-19.2049	-11.86	-3.22616	-20.2443	-15.7779	-14.6812	-11.41	-15.9346	-12.8027	-13.21	-16.8952	-11.2182	-15.431	-12.0818	-13.2273	-13.9523	-12.1151	-9.77562	-9.82879	-14.1301	-13.8655	-7.4794	-7.03433	-8.48269	-10.4559	-9.18247	-9.93233	-12.8362	-11.5911	-11.1952	-12.2966	-13.9445	-13.8814
Camsap1	2	25926838	25983282	-	Camsap1	ENSMUSG00000026933	calmodulin regulated spectrin-associated protein 1 [Source:MGI Symbol;Acc:MGI:3036242]	-	gene	Name match	0	3.81088e-09	4.02233e-08	-4.34965	-11.5984	-18.2716	-16.5345	-12.6935	-21.6161	-26.0878	-16.4694	-20.5247	-12.4011	-21.7781	-14.1723	-19.0535	-18.3387	-12.8223	-21.2745	-17.9253	-19.0708	-19.7959	-17.9586	-15.6191	-15.6723	-19.9736	-19.709	-13.3229	-12.8778	-14.3262	-11.8994	-15.026	-11.717	-18.6797	-17.4346	-10.3018	-18.1401	-19.788	-19.7249
Nacc2	2	26055535	26123220	-	Nacc2	ENSMUSG00000026932	nucleus accumbens associated 2, BEN and BTB (POZ) domain containing [Source:MGI Symbol;Acc:MGI:1915241]	-	gene	Name match	0	8.5152e-07	6.47435e-06	-7.23724	-11.4372	-17.6405	-11.9979	-12.4916	-22.0094	-21.7384	-21.8834	-11.6347	-13.7785	-17.3032	-12.5274	-19.3155	-15.2266	-12.5868	-16.9922	-14.4504	-19.3328	-20.0579	-18.2206	-9.48122	-15.9343	-20.2356	-14.961	-13.5849	-13.1398	-14.5882	-16.5614	-9.55103	-16.0379	-18.9417	-17.6966	-17.3008	-13.0407	-13.3589	-16.1345
Gm13554	2	26059010	26060275	+	Gm13554	ENSMUSG00000087515	predicted gene 13554 [Source:MGI Symbol;Acc:MGI:3650406]	+	gene	Name match	0	0.0111786	0.0456625	-5.19888	-9.94121	-19.0744	-19.5699	-12.225	-20.8132	-20.6093	-16.1429	-15.0462	-11.775	-16.2996	-13.1678	-13.575	-12.6487	-11.5832	-15.796	-12.4468	-13.5923	-14.3174	-12.4801	-10.1406	-10.1938	-14.4951	-14.2305	-7.84441	-7.39934	-8.84771	-10.8209	-9.54748	-10.2973	-13.2012	-11.9561	-11.5602	-12.6616	-14.3095	-14.2464
Tmem250-ps	2	26136814	26140521	-	Tmem250-ps	ENSMUSG00000087679	transmembrane protein 250, pseudogene [Source:MGI Symbol;Acc:MGI:1924939]	-	gene	Name match	0	5.18902e-15	1.16226e-13	-6.50687	-11.8635	-20.6248	-21.1203	-8.76536	-22.3636	-22.1597	-17.6933	-16.5965	-8.04408	-11.4501	-14.7181	-9.8859	-18.8105	-13.1336	-12.0244	-8.67528	-15.1426	-15.8677	-14.0304	-11.691	-7.0072	-16.0455	-15.7809	-9.39478	-8.9497	-10.3981	-12.3712	-11.0978	-6.60825	-14.7516	-13.5064	-13.1106	-14.212	-15.8599	-15.7968
Gpsm1	2	26315515	26348237	+	Gpsm1	ENSMUSG00000026930	G-protein signalling modulator 1 (AGS3-like, C. elegans) [Source:MGI Symbol;Acc:MGI:1915089]	+	gene	Name match	0	2.52216e-08	2.37791e-07	-6.12139	-12.8258	-23.7664	-15.1297	-16.9169	-21.8937	-25.3013	-20.8349	-19.7381	-16.467	-20.9916	-17.8597	-18.267	-21.9521	-16.2752	-20.488	-17.1388	-18.2842	-19.0093	-17.172	-10.3587	-14.8858	-19.187	-18.9224	-12.5364	-12.0913	-13.5397	-15.5128	-14.2394	-14.9893	-17.8932	-16.648	-16.2522	-12.8092	-19.0015	-18.9383
Snapc4	2	26362765	26380653	-	Snapc4	ENSMUSG00000036281	small nuclear RNA activating complex, polypeptide 4 [Source:MGI Symbol;Acc:MGI:2443935]	-	gene	Name match	0	0.000208188	0.00113784	-7.84662	-13.8994	-13.5095	-15.0002	-16.0457	-24.6339	-24.43	-13.8116	-18.8669	-10.5857	-20.1203	-16.9885	-17.3957	-15.174	-9.8257	-14.0053	-16.2676	-17.413	-18.1381	-16.3008	-13.9614	-14.0145	-18.3158	-18.0512	-11.6651	-11.2201	-12.6684	-9.63162	-13.3682	-14.1181	-17.022	-15.7768	-15.381	-16.4823	-18.1302	-18.0671
Gm13563	2	26381526	26389018	+	Gm13563	ENSMUSG00000085767	predicted gene 13563 [Source:MGI Symbol;Acc:MGI:3652052]	+	gene	Name match	0	0.000396159	0.00206922	-6.48576	-17.1179	-21.6397	-22.1352	-14.7902	-23.3785	-23.1746	-18.7082	-17.6115	-14.3403	-18.8649	-15.733	-16.1403	-19.8254	-14.1485	-18.3613	-15.0121	-11.7576	-16.8826	-15.0453	-12.7059	-12.7591	-17.0604	-16.7958	-10.4097	-9.96461	-11.413	-13.3861	-12.1128	-12.8626	-15.7665	-14.5213	-14.1255	-15.2269	-16.8748	-16.8117
Entr1	2	26382802	26389316	-	Entr1	ENSMUSG00000026927	endosome associated trafficking regulator 1 [Source:MGI Symbol;Acc:MGI:1915362]	-	gene	Name match	0	5.01861e-06	3.46158e-05	-6.68395	-16.9161	-21.4379	-21.9334	-14.5885	-23.1767	-22.9728	-18.5064	-17.4097	-14.1385	-18.6631	-15.5312	-15.9385	-19.6237	-13.9467	-18.1595	-14.8103	-11.5558	-16.6808	-14.8436	-7.95981	-12.5573	-16.8586	-16.594	-10.2079	-9.76283	-11.2112	-13.1844	-11.911	-12.6608	-15.5647	-14.3196	-13.9237	-15.0251	-16.673	-16.6099
Pmpca	2	26389339	26397122	+	Pmpca	ENSMUSG00000026926	peptidase (mitochondrial processing) alpha [Source:MGI Symbol;Acc:MGI:1918568]	+	gene	Name match	0	2.04595e-10	2.5591e-09	-8.57149	-12.7729	-21.6946	-22.1902	-14.8452	-23.4334	-23.2296	-18.7632	-17.6664	-14.3952	-18.9199	-15.788	-16.1952	-19.8804	-14.2035	-18.4162	-15.0671	-16.2125	-16.9376	-15.1003	-12.7609	-12.814	-17.1153	-16.8507	-10.4646	-10.0196	-11.4679	-13.4411	-12.1677	-12.9176	-15.8215	-14.5763	-14.1805	-15.2818	-16.9298	-16.8666
Inpp5e	2	26396249	26409203	-	Inpp5e	ENSMUSG00000026925	inositol polyphosphate-5-phosphatase E [Source:MGI Symbol;Acc:MGI:1927753]	-	gene	Name match	0	1.17836e-06	8.80517e-06	-6.76014	-17.9078	-22.4296	-22.9251	-15.5801	-24.1683	-23.9645	-19.4981	-18.4013	-15.1302	-19.6548	-16.5229	-16.9302	-20.6153	-14.9384	-19.1512	-15.802	-16.9474	-17.6725	-15.8352	-13.4958	-13.549	-17.8503	-17.5857	-11.1996	-10.7545	-12.2029	-14.176	-12.9026	-13.6525	-16.5564	-15.3112	-14.9154	-16.0168	-17.6647	-12.6947
Sec16a	2	26409431	26445216	-	Sec16a	ENSMUSG00000026924	SEC16 homolog A, endoplasmic reticulum export factor [Source:MGI Symbol;Acc:MGI:2139207]	-	gene	Name match	0	3.74902e-12	5.91452e-11	-7.30666	-12.1342	-19.8365	-16.908	-12.6461	-25.6342	-25.4304	-17.49	-19.8672	-11.9846	-16.0618	-12.9299	-18.3961	-22.0812	-16.4043	-20.6171	-17.2679	-13.132	-19.1384	-17.3011	-14.9617	-10.7754	-19.3161	-19.0515	-12.6655	-12.2204	-13.6688	-15.6419	-14.3685	-15.1184	-18.0223	-16.7771	-16.3813	-17.4826	-14.5191	-19.0674
Gm13568	2	26457144	26458316	+	Gm13568	ENSMUSG00000085543	predicted gene 13568 [Source:MGI Symbol;Acc:MGI:3702049]	+	gene	Name match	0	0.00318912	0.0142521	-5.16741	-9.29056	-13.2888	-19.4598	-12.1149	-20.7031	-20.4993	-16.0328	-14.9361	-11.6649	-16.1895	-13.0577	-13.4649	-17.1501	-6.2337	-15.6859	-12.3368	-13.4822	-14.2073	-12.37	-10.0306	-10.0837	-14.385	-14.1204	-7.73434	-7.28927	-8.73763	-10.7108	-4.15612	-10.1873	-13.0912	-11.846	-11.4502	-12.5515	-9.18946	-8.85503
Notch1	2	26457903	26516663	-	Notch1	ENSMUSG00000026923	notch 1 [Source:MGI Symbol;Acc:MGI:97363]	-	gene	Name match	0	0.00313356	0.0140179	-2.57048	-11.0699	-16.1735	-16.396	-11.5434	-26.3497	-26.1458	-17.3575	-20.5827	-17.3115	-21.8361	-18.7043	-19.1115	-22.7967	-17.1198	-17.8586	-17.9833	-19.1288	-19.8539	-18.0166	-15.6771	-15.7303	-20.0316	-19.767	-13.3809	-12.9358	-14.3842	-16.3574	-15.084	-15.8339	-18.7377	-17.4926	-17.0968	-18.1981	-14.1091	-19.7829
Egfl7	2	26580014	26593120	+	Egfl7	ENSMUSG00000026921	EGF-like domain 7 [Source:MGI Symbol;Acc:MGI:2449923]	+	gene	Name match	0	0.00333487	0.0148606	5.15114	-6.5241	-22.4464	-22.9419	-15.597	-24.1852	-23.9813	-19.5149	-18.4182	-15.147	-19.6716	-16.5397	-16.947	-20.6322	-14.9552	-19.168	-15.8188	-16.9643	-17.6893	-15.8521	-13.5126	-13.5658	-17.8671	-17.6025	-11.2164	-10.7713	-12.2197	-14.1929	-12.9195	-13.6693	-16.5732	-15.3281	-14.9322	-16.0336	-17.6815	-17.6184
Agpat2	2	26593057	26604417	-	Agpat2	ENSMUSG00000026922	1-acylglycerol-3-phosphate O-acyltransferase 2 (lysophosphatidic acid acyltransferase, beta) [Source:MGI Symbol;Acc:MGI:1914762]	-	gene	Name match	0	0.00141494	0.00670559	-2.0216	-17.7184	-22.2401	-16.8557	-15.3907	-23.9789	-23.7751	-19.3087	-18.2119	-10.8819	-19.4654	-16.3335	-11.8339	-20.4259	-14.749	-18.9618	-15.6126	-16.758	-17.4831	-15.6458	-13.3064	-13.3595	-17.6608	-17.3962	-11.0102	-10.5651	-12.0134	-13.9866	-12.7132	-13.4631	-16.367	-15.1218	-14.726	-15.8273	-17.4753	-17.4121
Med22	2	26905262	26910677	-	Med22	ENSMUSG00000015776	mediator complex subunit 22 [Source:MGI Symbol;Acc:MGI:98446]	-	gene	Name match	0	2.24171e-05	0.000140269	-7.77769	-9.29792	-21.1713	-21.6669	-14.3219	-22.9101	-22.7063	-18.2399	-17.1431	-13.872	-18.3966	-15.2647	-15.672	-19.3571	-13.6802	-17.893	-14.5438	-15.6892	-16.4143	-14.577	-12.2376	-12.2908	-16.592	-16.3274	-9.94136	-9.49629	-10.9447	-12.9178	-11.6444	-12.3943	-15.2982	-14.053	-13.6572	-14.7586	-16.4065	-16.3433
Rpl7a	2	26910764	26913318	+	Rpl7a	ENSMUSG00000062647	ribosomal protein L7A [Source:MGI Symbol;Acc:MGI:1353472]	+	gene	Name match	0	1.91669e-32	2.56455e-30	-5.55534	-15.5657	-20.0874	-20.583	-13.238	-7.14035	-21.6224	-17.156	-16.0592	-12.7881	-17.3127	-14.1808	-14.5881	-18.2732	-12.5963	-16.8091	-13.4599	-14.6053	-15.3304	-13.4931	-11.1537	-11.2068	-15.5081	-15.2435	-8.85746	-8.41239	-9.86075	-11.8339	-10.5605	-11.3104	-14.2143	-12.9691	-12.5733	-13.6746	-15.3226	-15.2594
Surf1	2	26913381	26916530	-	Surf1	ENSMUSG00000015790	surfeit gene 1 [Source:MGI Symbol;Acc:MGI:98443]	-	gene	Name match	0	2.4684e-07	2.04167e-06	-7.22309	-10.2239	-20.3895	-20.885	-13.5401	-18.1689	-21.9244	-17.458	-16.3613	-13.0901	-17.6147	-14.4828	-14.8901	-18.5753	-12.8983	-17.1111	-13.7619	-14.9073	-15.6324	-13.7951	-11.4557	-11.5089	-15.8102	-15.5456	-9.15949	-8.71441	-10.1628	-12.136	-10.8626	-11.6124	-14.5163	-13.2712	-12.8753	-13.9767	-15.6246	-15.5615
Surf2	2	26916367	26920183	+	Surf2	ENSMUSG00000014873	surfeit gene 2 [Source:MGI Symbol;Acc:MGI:98444]	+	gene	Name match	0	1.9528e-08	1.87135e-07	-4.23022	-11.7449	-20.6666	-21.1621	-13.8171	-22.4053	-22.2015	-17.7351	-16.6383	-13.3672	-17.8918	-14.7599	-15.1672	-18.8523	-13.1754	-17.3882	-14.039	-15.1844	-15.9095	-14.0722	-11.7328	-11.786	-16.0873	-15.8227	-9.43657	-8.9915	-10.4399	-12.413	-11.1396	-11.8895	-14.7934	-13.5482	-13.1524	-14.2538	-15.9017	-15.8386
Surf4	2	26920040	26933928	-	Surf4	ENSMUSG00000014867	surfeit gene 4 [Source:MGI Symbol;Acc:MGI:98445]	-	gene	Name match	0	2.78647e-09	2.99166e-08	-3.61874	-9.52531	-13.154	-23.0255	-15.6806	-20.7948	-24.0649	-19.5985	-18.5018	-15.2306	-19.7552	-16.6233	-17.0306	-20.7158	-15.0388	-19.2516	-15.9024	-17.0479	-17.7729	-15.9357	-13.5962	-13.6494	-17.9507	-17.6861	-11.3	-10.8549	-12.3033	-14.2765	-13.0031	-13.7529	-16.6568	-15.4117	-10.6159	-16.1172	-17.7651	-17.702
Rexo4	2	26953563	26964386	-	Rexo4	ENSMUSG00000052406	REX4, 3'-5' exonuclease [Source:MGI Symbol;Acc:MGI:2684957]	-	gene	Name match	0	0.000374047	0.00196324	-5.18148	-12.139	-22.1703	-22.6658	-9.99894	-23.9091	-23.7052	-19.2388	-18.1421	-14.8709	-19.3955	-16.2636	-16.6709	-13.9946	-14.6791	-18.8919	-15.5427	-16.6882	-17.4132	-15.5759	-13.2365	-13.2897	-17.591	-17.3264	-10.9403	-10.4952	-11.9436	-13.9168	-12.6434	-13.3932	-16.2971	-8.99307	-14.6561	-15.7575	-17.4054	-17.3423
Adamtsl2	2	27079379	27108981	+	Adamtsl2	ENSMUSG00000036040	ADAMTS-like 2 [Source:MGI Symbol;Acc:MGI:1925044]	+	gene	Name match	0	4.82437e-15	1.08605e-13	-5.11167	-11.5472	-15.2314	-15.1451	-16.7724	-21.7491	-25.1567	-16.9533	-19.5936	-11.5854	-20.847	-17.7151	-18.1224	-21.8076	-16.1306	-20.3434	-16.9942	-18.1397	-18.8647	-17.0275	-14.688	-14.7412	-19.0425	-18.7779	-12.3918	-11.9467	-13.3951	-15.3683	-14.0949	-14.8447	-17.7486	-16.5035	-16.1076	-17.209	-18.8569	-18.7938
Vav2	2	27262104	27427033	-	Vav2	ENSMUSG00000009621	vav 2 oncogene [Source:MGI Symbol;Acc:MGI:102718]	-	gene	Name match	0	0.000538994	0.00275504	-5.86979	-11.4588	-15.445	-19.1035	-11.8696	-27.8386	-27.6348	-18.8464	-22.0716	-14.8411	-23.3251	-20.1932	-20.6004	-24.2856	-12.2472	-17.46	-19.4723	-20.6177	-15.7314	-15.8941	-17.1661	-12.3668	-21.5205	-16.1497	-14.8698	-14.4248	-15.8731	-12.0796	-12.0286	-17.3228	-20.2267	-18.9815	-14.6263	-19.687	-21.335	-16.5349
Brd3	2	27445579	27507662	-	Brd3	ENSMUSG00000026918	bromodomain containing 3 [Source:MGI Symbol;Acc:MGI:1914632]	-	gene	Name match	0	1.37515e-23	7.89405e-22	-6.79787	-12.6946	-19.5841	-14.5754	-10.3225	-26.4291	-26.2252	-17.2849	-16.2621	-17.3909	-21.9155	-14.7247	-19.1909	-16.1849	-12.6548	-21.4119	-18.0627	-19.2081	-19.9332	-18.0959	-10.9607	-15.8097	-20.111	-19.8464	-13.4603	-13.0152	-14.4636	-16.4367	-15.1634	-15.9132	-18.8171	-17.572	-17.1761	-14.038	-19.9254	-19.8623
Rxra	2	27676440	27762957	+	Rxra	ENSMUSG00000015846	retinoid X receptor alpha [Source:MGI Symbol;Acc:MGI:98214]	+	gene	Name match	0	0.00285058	0.0128424	-4.43711	-11.4646	-15.7834	-16.7214	-12.8101	-26.9078	-26.704	-22.2376	-11.6896	-11.3426	-16.2881	-19.2624	-19.6697	-23.3548	-17.6779	-18.5687	-18.5415	-19.6869	-15.5596	-18.5747	-10.1764	-10.0921	-20.5897	-20.3251	-13.9391	-13.494	-14.9424	-16.9155	-15.6421	-16.392	-19.2959	-18.0507	-17.6549	-18.7563	-15.0042	-20.341
Col5a1	2	27886425	28039514	+	Col5a1	ENSMUSG00000026837	collagen, type V, alpha 1 [Source:MGI Symbol;Acc:MGI:88457]	+	gene	Name match	0	4.97416e-18	1.63166e-16	-4.9488	-12.1067	-18.7851	-15.7775	-19.1429	-23.4917	-27.5273	-16.0262	-21.9641	-13.2556	-18.8956	-14.3791	-20.493	-24.1781	-18.5012	-22.714	-19.3648	-15.7733	-21.2353	-19.398	-17.0586	-12.8723	-21.4131	-21.1485	-14.7624	-14.3173	-15.7657	-17.7388	-16.4654	-17.2153	-15.6453	-18.874	-18.4782	-14.7271	-16.4905	-21.1644
Olfm1	2	28192992	28230736	+	Olfm1	ENSMUSG00000026833	olfactomedin 1 [Source:MGI Symbol;Acc:MGI:1860437]	+	gene	Name match	0	7.03106e-09	7.16001e-08	-8.69556	-10.9766	-20.2354	-19.8564	-17.1229	-25.7111	-25.5073	-15.8889	-19.9441	-16.6729	-21.1976	-13.8262	-18.4729	-22.1581	-16.4812	-20.6939	-17.3448	-18.4902	-19.2153	-17.378	-15.0386	-15.0917	-19.393	-19.1284	-12.7423	-12.2973	-13.7456	-11.1745	-10.7085	-15.1953	-18.0992	-16.854	-16.4582	-17.5595	-19.2075	-19.1443
Ralgds	2	28513125	28553081	+	Ralgds	ENSMUSG00000026821	ral guanine nucleotide dissociation stimulator [Source:MGI Symbol;Acc:MGI:107485]	+	gene	Name match	0	9.30004e-07	7.02308e-06	-6.94028	-11.6803	-17.693	-12.9939	-17.2051	-20.1818	-25.5894	-16.2161	-20.0263	-16.7551	-21.2797	-18.1479	-13.8181	-22.2403	-12.019	-20.7761	-17.4269	-18.5724	-19.2975	-17.4602	-15.1207	-15.1739	-19.4752	-19.2106	-12.8245	-12.3794	-13.8278	-15.801	-14.5276	-15.2774	-18.1813	-16.9362	-16.5403	-17.6417	-19.2896	-19.2265
Gtf3c5	2	28566311	28583751	-	Gtf3c5	ENSMUSG00000026816	general transcription factor IIIC, polypeptide 5 [Source:MGI Symbol;Acc:MGI:1917489]	-	gene	Name match	0	0.000609649	0.00308868	-5.91638	-11.6929	-22.8585	-23.3541	-16.0091	-20.4453	-24.3935	-19.9271	-18.8303	-15.5591	-20.0838	-16.9519	-17.3591	-21.0443	-15.3674	-19.5801	-16.231	-17.3764	-18.1015	-16.2642	-9.01788	-13.9779	-18.2792	-18.0146	-11.6285	-11.1835	-12.6318	-14.605	-13.3316	-14.0815	-16.9854	-15.7402	-15.3444	-16.4457	-18.0937	-18.0305
Tsc1	2	28641228	28691167	+	Tsc1	ENSMUSG00000026812	tuberous sclerosis 1 [Source:MGI Symbol;Acc:MGI:1929183]	+	gene	Name match	0	0.00726366	0.0307507	-3.21965	-12.1868	-15.6059	-16.6808	-17.5268	-19.1428	-20.5497	-14.9177	-16.4956	-13.018	-21.6015	-18.4696	-18.8769	-22.562	-16.8851	-21.0979	-17.7487	-18.8941	-19.6192	-17.7819	-15.4425	-15.4956	-19.7969	-19.5323	-13.1463	-12.7012	-14.1496	-16.1227	-14.8493	-15.5992	-18.5031	-11.858	-16.8621	-17.9634	-19.6114	-14.1868
Ddx31	2	28840406	28905571	+	Ddx31	ENSMUSG00000026806	DEAD/H (Asp-Glu-Ala-Asp/His) box polypeptide 31 [Source:MGI Symbol;Acc:MGI:2682639]	+	gene	Name match	0	0.000204481	0.00111827	-6.79764	-12.3929	-15.526	-25.2557	-17.9108	-20.0071	-21.0556	-21.8287	-20.732	-17.4608	-21.9854	-18.8535	-19.2608	-22.9459	-17.269	-21.4818	-18.1326	-19.278	-20.0031	-18.1658	-15.8264	-15.8796	-20.1809	-19.9163	-13.5302	-13.0851	-14.5335	-16.5066	-15.2333	-15.9831	-18.887	-11.261	-17.246	-18.3474	-19.9953	-19.9322
Ttf1	2	29060262	29087656	+	Ttf1	ENSMUSG00000026803	transcription termination factor, RNA polymerase I [Source:MGI Symbol;Acc:MGI:105044]	+	gene	Name match	0	5.56198e-10	6.52676e-09	-7.16429	-14.0288	-15.63	-12.0289	-16.6605	-25.2487	-25.0449	-20.5785	-19.4817	-16.2106	-20.7352	-17.6033	-18.0106	-21.6957	-16.0188	-20.2316	-16.8824	-18.0278	-18.7529	-16.9156	-14.5762	-14.6294	-18.9307	-18.6661	-12.28	-11.8349	-13.2833	-15.2564	-13.983	-14.7329	-17.6368	-16.3916	-15.9958	-17.0972	-18.7451	-18.682
Setx	2	29124181	29182471	+	Setx	ENSMUSG00000043535	senataxin [Source:MGI Symbol;Acc:MGI:2443480]	+	gene	Name match	0	1.05159e-11	1.56337e-10	-5.10837	-11.6036	-17.2281	-25.0948	-12.0433	-22.7267	-21.9822	-16.872	-20.5711	-17.2999	-21.8245	-18.6927	-19.0999	-22.7851	-17.1082	-21.3209	-17.9718	-19.1172	-19.8423	-18.005	-15.6656	-15.7187	-20.02	-19.7554	-13.3693	-12.9243	-14.3726	-16.3458	-15.0724	-15.8223	-18.7262	-17.481	-17.0852	-18.1865	-14.7756	-19.7713
Med27	2	29346819	29524793	+	Med27	ENSMUSG00000026799	mediator complex subunit 27 [Source:MGI Symbol;Acc:MGI:1916225]	+	gene	Name match	0	0.000283453	0.00151318	-6.63425	-11.3325	-16.1704	-19.0694	-11.2894	-27.9484	-21.7346	-18.0818	-22.1814	-18.9103	-23.4349	-12.9222	-14.2184	-24.3954	-18.7185	-18.6093	-14.7297	-20.7275	-21.4526	-19.6153	-11.1239	-9.8195	-17.7779	-21.3657	-14.9797	-14.5346	-9.4734	-17.9561	-16.6827	-17.4326	-20.3365	-14.8519	-18.6955	-19.7969	-16.1635	-15.1211
Rapgef1	2	29619720	29740978	+	Rapgef1	ENSMUSG00000039844	Rap guanine nucleotide exchange factor (GEF) 1 [Source:MGI Symbol;Acc:MGI:104580]	+	gene	Name match	0	1.1259e-07	9.7927e-07	-7.42891	-11.6073	-17.2704	-16.1667	-14.2623	-27.3949	-22.0848	-18.049	-21.6279	-18.3567	-14.4909	-19.7494	-20.1567	-23.8418	-12.2316	-22.3777	-12.4842	-20.1739	-20.899	-19.0617	-16.7223	-16.7755	-13.7056	-20.8122	-14.4261	-13.981	-15.4294	-13.1631	-16.1292	-16.879	-19.7829	-18.5378	-18.1419	-13.114	-20.8912	-20.8281
Trub2	2	29761224	29788502	-	Trub2	ENSMUSG00000039826	TruB pseudouridine (psi) synthase family member 2 [Source:MGI Symbol;Acc:MGI:2442186]	-	gene	Name match	0	0.00100542	0.00490058	-4.92294	-11.4638	-23.5038	-16.0336	-16.6544	-20.6312	-25.0388	-20.5724	-19.4756	-16.2044	-20.7291	-17.5972	-13.9456	-21.6896	-11.9538	-20.2255	-16.8763	-13.4103	-18.7468	-16.9095	-14.5701	-14.6232	-18.9245	-18.6599	-12.2739	-11.8288	-13.2771	-15.2503	-13.9769	-14.7268	-17.6307	-16.3855	-15.9897	-17.091	-18.739	-18.6758
Slc27a4	2	29802634	29817522	+	Slc27a4	ENSMUSG00000059316	solute carrier family 27 (fatty acid transporter), member 4 [Source:MGI Symbol;Acc:MGI:1347347]	+	gene	Name match	0	0.00972311	0.0401363	-4.79606	-10.3055	-22.6303	-16.008	-11.5414	-21.0472	-24.1652	-19.6988	-18.6021	-15.3309	-19.8555	-16.7237	-17.1309	-20.8161	-15.1391	-19.3519	-16.0027	-17.1482	-12.9139	-16.036	-13.6965	-13.7497	-18.051	-17.7864	-11.4003	-10.9552	-12.4036	-14.3768	-13.1034	-13.8532	-12.3572	-11.4531	-15.1161	-16.2175	-17.8654	-17.8023
Cercam	2	29869164	29882840	+	Cercam	ENSMUSG00000039787	cerebral endothelial cell adhesion molecule [Source:MGI Symbol;Acc:MGI:2139134]	+	gene	Name match	0	1.63521e-10	2.07482e-09	-7.03453	-12.0011	-22.5078	-23.0033	-15.6584	-24.2466	-24.0427	-19.5763	-18.4796	-15.2084	-19.733	-16.6012	-17.0084	-20.6936	-15.0166	-19.2294	-15.8802	-11.7037	-17.7508	-15.9135	-13.574	-13.6272	-17.9285	-17.6639	-11.2778	-10.8327	-12.2811	-14.2543	-12.9809	-13.7308	-16.6346	-15.3895	-14.9936	-16.095	-17.7429	-17.6798
Gle1	2	29935426	29960371	+	Gle1	ENSMUSG00000019715	GLE1 RNA export mediator (yeast) [Source:MGI Symbol;Acc:MGI:1921662]	+	gene	Name match	0	0.00341048	0.0151766	-3.27193	-12.7469	-13.4797	-14.48	-16.5254	-20.2068	-19.8998	-20.4434	-19.3466	-11.1161	-20.6001	-17.4682	-17.8755	-21.5606	-15.8837	-20.0965	-16.7473	-17.8927	-18.6178	-16.7805	-14.4411	-14.4943	-18.7956	-18.531	-12.1449	-11.6998	-13.1482	-15.1213	-13.8479	-14.5978	-12.5423	-16.2565	-15.8607	-13.0027	-18.61	-18.5469
Sptan1	2	29965560	30031451	+	Sptan1	ENSMUSG00000057738	spectrin alpha, non-erythrocytic 1 [Source:MGI Symbol;Acc:MGI:98386]	+	gene	Name match	0	3.48955e-18	1.16836e-16	-6.26522	-10.6803	-15.4368	-16.7103	-12.4528	-22.041	-26.3111	-15.9647	-15.1365	-17.4768	-22.0014	-13.7175	-19.2768	-17.1375	-10.2261	-21.4978	-18.1486	-14.8941	-20.0191	-11.2485	-10.0465	-10.7894	-20.1968	-19.9322	-13.5462	-13.1011	-14.5495	-16.5226	-15.2492	-15.9991	-18.903	-13.3359	-17.262	-18.3634	-15.3998	-14.4386
Set	2	30057378	30072577	+	Set	ENSMUSG00000054766	SET nuclear oncogene [Source:MGI Symbol;Acc:MGI:1860267]	+	gene	Name match	0	0	0	-11.0624	-9.33172	-14.2889	-17.0264	-11.4108	-20.4395	-24.1951	-19.7286	-18.6319	-15.3607	-19.8853	-7.29086	-17.1607	-20.8459	-7.65064	-19.3817	-16.0326	-17.178	-11.2916	-16.0658	-13.7264	-13.7795	-18.0808	-17.8162	-11.4301	-10.9851	-12.4334	-8.93267	-13.1332	-13.8831	-16.7869	-15.5418	-15.146	-16.2473	-17.8952	-17.8321
Zer1	2	30097283	30124585	-	Zer1	ENSMUSG00000039686	zyg-11 related, cell cycle regulator [Source:MGI Symbol;Acc:MGI:2442511]	-	gene	Name match	0	4.37446e-10	5.22454e-09	-7.08696	-11.465	-23.5051	-24.0006	-16.6557	-25.2439	-25.04	-14.6937	-19.4769	-16.2057	-20.7303	-17.5985	-13.5318	-21.6909	-16.014	-20.2267	-16.8776	-18.023	-18.7481	-16.9108	-14.5713	-14.6245	-18.9258	-18.6612	-12.2751	-11.83	-13.2784	-15.2516	-13.9782	-14.7281	-17.6319	-16.3868	-15.991	-17.0923	-18.7402	-14.1328
Spout1	2	30173453	30178459	-	Spout1	ENSMUSG00000039660	SPOUT domain containing methyltransferase 1 [Source:MGI Symbol;Acc:MGI:106544]	-	gene	Name match	0	0.000111564	0.000632778	-2.67409	-8.28102	-21.0581	-21.5536	-14.2087	-6.22358	-22.593	-18.1266	-17.0299	-13.7587	-18.2833	-15.1514	-15.5587	-19.2438	-13.5669	-17.7797	-14.4305	-15.5759	-16.301	-14.4637	-12.1243	-12.1775	-16.4788	-16.2142	-9.82808	-9.38301	-10.8314	-12.8045	-11.5312	-12.281	-15.1849	-13.9397	-13.5439	-9.79283	-16.2932	-16.2301
Kyat1	2	30185124	30205847	-	Kyat1	ENSMUSG00000039648	kynurenine aminotransferase 1 [Source:MGI Symbol;Acc:MGI:1917516]	-	gene	Name match	0	0.000617699	0.0031268	-5.90876	-13.9742	-14.7169	-18.696	-16.2579	-24.8461	-24.6423	-20.1759	-19.0791	-15.808	-20.3326	-17.2007	-17.608	-21.2931	-15.6162	-13.7228	-16.4798	-17.6252	-13.806	-16.513	-14.1736	-14.2268	-18.528	-18.2634	-11.8774	-11.4323	-12.8807	-14.8538	-13.5804	-14.3303	-12.4383	-15.989	-15.5932	-12.6357	-18.3425	-18.2793
Lrrc8a	2	30237715	30263790	+	Lrrc8a	ENSMUSG00000007476	leucine rich repeat containing 8A [Source:MGI Symbol;Acc:MGI:2652847]	+	gene	Name match	0	3.69478e-27	3.02997e-25	-5.76095	-11.2732	-13.1626	-23.9343	-16.5894	-25.1776	-24.9737	-20.5073	-13.9366	-16.1394	-20.664	-9.20022	-13.3951	-16.8876	-10.7081	-20.1604	-16.8112	-17.9566	-18.6817	-16.8444	-14.505	-9.19672	-18.8595	-14.2729	-12.2088	-11.7637	-13.2121	-15.1853	-13.9119	-14.6617	-13.8286	-16.3205	-15.9246	-17.026	-18.6739	-18.6108
Gm28035	2	30240567	30282148	+	Gm28035	ENSMUSG00000099041	predicted gene, 28035 [Source:MGI Symbol;Acc:MGI:5547771]	+	gene	Name match	0	0.000668675	0.00336712	-2.06043	-11.1575	-14.1543	-15.2364	-17.2626	-25.8508	-25.6469	-21.1805	-14.6099	-16.8126	-21.3372	-9.87345	-14.0683	-17.5608	-12.2989	-20.8336	-17.4844	-18.6299	-19.355	-17.5177	-15.1782	-9.86996	-19.5327	-14.9462	-12.882	-12.4369	-13.8853	-15.8585	-14.5851	-15.335	-14.5019	-16.9937	-16.5979	-17.6992	-19.3471	-19.284
Phyhd1	2	30266203	30282149	+	Phyhd1	ENSMUSG00000079484	phytanoyl-CoA dioxygenase domain containing 1 [Source:MGI Symbol;Acc:MGI:3612860]	+	gene	Name match	0	1.10808e-06	8.2974e-06	-6.49998	-10.8076	-16.2554	-13.8537	-15.8799	-24.4681	-24.2643	-19.7979	-18.7011	-15.4299	-19.9546	-16.8227	-17.2299	-20.9151	-15.2382	-19.4509	-16.1018	-17.2472	-17.9723	-16.135	-13.7956	-13.8487	-18.15	-17.8854	-11.4993	-11.0543	-12.5026	-14.4758	-13.2024	-13.9523	-16.8562	-15.611	-15.2152	-16.3165	-17.9645	-17.9013
Gm28038	2	30281043	30301078	+	Gm28038	ENSMUSG00000098794	predicted gene, 28038 [Source:MGI Symbol;Acc:MGI:5547774]	+	gene	Name match	0	0.000258308	0.00138643	-3.59911	-11.6167	-15.6972	-14.6879	-16.2092	-24.7974	-24.5936	-20.1272	-19.0304	-15.7593	-20.2839	-17.152	-17.5592	-21.2444	-9.89192	-19.7803	-16.4311	-17.5765	-18.3016	-16.4643	-14.1249	-14.178	-18.4793	-18.2147	-11.8287	-11.3836	-12.832	-14.8051	-13.5317	-14.2816	-17.1855	-15.9403	-15.5445	-16.6458	-18.2938	-18.2306
Dolk	2	30284231	30286334	-	Dolk	ENSMUSG00000075419	dolichol kinase [Source:MGI Symbol;Acc:MGI:2677836]	-	gene	Name match	0	6.47952e-06	4.40395e-05	-8.1229	-10.046	-19.8073	-20.3028	-12.9578	-21.546	-21.3422	-16.8758	-15.779	-12.5079	-17.0325	-13.9006	-14.3079	-17.993	-12.3161	-16.5289	-13.1797	-14.3251	-15.0502	-13.2129	-10.8735	-10.9267	-15.2279	-14.9634	-8.57727	-8.1322	-9.58056	-11.5537	-10.2803	-11.0302	-13.9341	-12.6889	-12.2931	-13.3945	-15.0424	-14.9793
Nup188	2	30286397	30344266	+	Nup188	ENSMUSG00000052533	nucleoporin 188 [Source:MGI Symbol;Acc:MGI:2446190]	+	gene	Name match	0	0.00688923	0.029347	-4.29061	-11.6483	-17.2274	-15.3103	-13.3395	-26.3277	-26.1238	-16.0791	-20.5607	-12.5525	-21.8141	-18.6822	-19.0895	-22.7746	-11.4221	-21.3105	-17.9613	-19.1067	-19.8318	-13.4502	-15.6551	-15.7083	-20.0096	-19.745	-13.3589	-12.9138	-14.3622	-16.3353	-15.062	-15.8118	-14.8633	-17.4705	-17.0747	-18.1761	-11.7955	-19.7609
Sh3glb2	2	30344809	30359337	-	Sh3glb2	ENSMUSG00000026860	SH3-domain GRB2-like endophilin B2 [Source:MGI Symbol;Acc:MGI:2385131]	-	gene	Name match	0	0.00111691	0.00540329	-5.49378	-12.7513	-22.595	-23.0905	-7.35516	-24.3338	-24.1299	-19.6635	-18.5668	-15.2956	-19.8202	-16.6883	-17.0956	-16.5413	-15.1038	-19.3166	-15.9674	-17.1129	-17.8379	-16.0007	-13.6612	-13.7144	-18.0157	-17.7511	-11.365	-10.9199	-12.3683	-14.3415	-13.0681	-13.8179	-12.3999	-15.4767	-15.0808	-16.1822	-17.8301	-17.767
Dolpp1	2	30392254	30400529	+	Dolpp1	ENSMUSG00000026856	dolichyl pyrophosphate phosphatase 1 [Source:MGI Symbol;Acc:MGI:1914093]	+	gene	Name match	0	7.08272e-09	7.20849e-08	-8.2247	-11.1786	-21.7831	-22.2786	-14.9336	-23.5218	-23.318	-18.8516	-17.7548	-14.4837	-19.0083	-15.8764	-16.2837	-19.9688	-9.68046	-18.5047	-15.1555	-16.3009	-17.026	-11.7148	-12.8493	-12.9025	-17.2037	-16.9391	-10.5531	-10.108	-11.5564	-13.5295	-12.2561	-13.006	-15.9099	-14.6647	-14.2689	-15.3703	-17.0182	-16.955
Crat	2	30400471	30415813	-	Crat	ENSMUSG00000026853	carnitine acetyltransferase [Source:MGI Symbol;Acc:MGI:109501]	-	gene	Name match	0	0.000423353	0.00219997	-4.43093	-10.9124	-14.2042	-23.1692	-15.8242	-24.4124	-24.2086	-19.7421	-18.6454	-11.9003	-19.8988	-16.767	-17.1742	-20.8594	-15.1825	-19.3952	-16.0461	-17.1915	-14.0641	-16.0793	-13.7399	-13.793	-18.0943	-17.8297	-11.4436	-10.9986	-12.4469	-14.4201	-8.82479	-13.8966	-12.6485	-15.5553	-15.1595	-16.2608	-17.9088	-17.8456
Ptpa	2	30416039	30447806	+	Ptpa	ENSMUSG00000039515	protein phosphatase 2 protein activator [Source:MGI Symbol;Acc:MGI:1346006]	+	gene	Name match	0	6.19649e-10	7.24029e-09	-5.80491	-11.3425	-16.0402	-17.9586	-12.0784	-19.529	-18.8586	-14.0108	-19.6954	-12.3653	-15.89	-17.817	-13.9848	-16.6699	-12.4955	-20.4452	-17.0961	-13.3891	-18.9666	-17.1293	-14.7899	-14.843	-19.1443	-18.8797	-12.4936	-12.0486	-13.4969	-15.4701	-9.87478	-14.9466	-7.10599	-10.6204	-16.2095	-12.2519	-18.9587	-18.8956
Cstad	2	30595040	30608943	+	Cstad	ENSMUSG00000047363	CSA-conditional, T cell activation-dependent protein [Source:MGI Symbol;Acc:MGI:1925867]	+	gene	Name match	0	0.00698402	0.0297011	-2.9949	-10.6386	-22.5315	-23.0271	-15.6821	-24.2703	-24.0665	-19.6001	-18.5033	-10.2222	-14.6979	-16.6249	-12.2952	-20.7173	-15.0404	-19.2532	-15.904	-12.7275	-17.7745	-15.9372	-13.5978	-13.651	-17.9522	-17.6876	-11.3016	-10.8565	-12.3049	-14.278	-13.0046	-13.7545	-16.6584	-15.4132	-15.0174	-16.1188	-17.7667	-17.7035
Asb6	2	30823097	30830333	-	Asb6	ENSMUSG00000039483	ankyrin repeat and SOCS box-containing 6 [Source:MGI Symbol;Acc:MGI:1919573]	-	gene	Name match	0	0.000226421	0.00123031	-5.77835	-9.97324	-21.5895	-22.085	-14.7401	-23.3283	-19.0655	-12.5991	-17.5613	-14.2901	-18.8147	-15.6829	-16.0901	-19.7753	-14.0984	-13.4042	-14.962	-16.1074	-16.8325	-14.9952	-12.6558	-12.7089	-17.0102	-16.7456	-10.3595	-9.91445	-11.3628	-7.30135	-12.0626	-12.8125	-15.7163	-14.4712	-14.0754	-15.1767	-16.8246	-16.7615
Ptges	2	30889471	30929863	-	Ptges	ENSMUSG00000050737	prostaglandin E synthase [Source:MGI Symbol;Acc:MGI:1927593]	-	gene	Name match	0	0.00948554	0.0392307	-3.93593	-11.6216	-24.0702	-24.5657	-12.6764	-25.8089	-21.2832	-15.5604	-15.8899	-12.8114	-21.2954	-13.4265	-18.5708	-22.2559	-16.579	-14.4499	-17.4426	-18.588	-15.7017	-17.4758	-10.177	-15.1896	-19.4908	-19.2262	-12.8402	-12.3951	-13.8435	-15.8166	-14.5432	-15.2931	-18.197	-16.9518	-12.819	-17.6574	-19.3053	-19.2421
Tor1b	2	30952959	30959015	+	Tor1b	ENSMUSG00000026848	torsin family 1, member B [Source:MGI Symbol;Acc:MGI:1353605]	+	gene	Name match	0	1.21243e-10	1.56743e-09	-6.8506	-9.47905	-21.3327	-21.8282	-14.4833	-23.0715	-22.8677	-18.4012	-17.3045	-14.0333	-18.5579	-15.4261	-15.8333	-19.5185	-13.8416	-18.0543	-14.7052	-15.8506	-16.5757	-14.7384	-12.399	-12.4521	-12.3535	-16.4888	-10.1027	-9.65767	-11.106	-13.0792	-11.8058	-12.5557	-15.4596	-14.2144	-13.8186	-14.9199	-16.5678	-16.5047
Tor1a	2	30960627	30967933	-	Tor1a	ENSMUSG00000026849	torsin family 1, member A (torsin A) [Source:MGI Symbol;Acc:MGI:1353568]	-	gene	Name match	0	2.01339e-07	1.68687e-06	-8.25478	-11.9754	-21.6034	-22.0989	-14.754	-23.3422	-23.1383	-18.6719	-17.5752	-14.304	-18.8286	-15.6968	-16.104	-19.7892	-14.1122	-18.325	-14.9758	-16.1213	-16.8464	-15.0091	-12.6696	-12.7228	-17.0241	-16.7595	-10.3734	-9.92834	-11.3767	-13.3499	-12.0765	-12.8264	-15.7302	-14.4851	-14.0892	-15.1906	-16.8385	-16.7754
BC005624	2	30972177	30982201	-	BC005624	ENSMUSG00000026851	cDNA sequence BC005624 [Source:MGI Symbol;Acc:MGI:2385132]	-	gene	Name match	0	8.05761e-17	2.28327e-15	-9.39902	-11.742	-16.9076	-22.5552	-11.2509	-23.7984	-23.5946	-13.9318	-18.0314	-14.7603	-19.2849	-16.153	-16.5603	-20.2454	-14.5685	-18.7813	-15.4321	-16.5775	-17.3026	-15.4653	-13.1259	-13.1791	-17.4803	-17.2157	-10.8297	-10.3846	-11.833	-13.8061	-12.5327	-13.2826	-16.1865	-14.9413	-14.5455	-15.6469	-17.2948	-17.2316
Usp20	2	30982279	31023586	+	Usp20	ENSMUSG00000026854	ubiquitin specific peptidase 20 [Source:MGI Symbol;Acc:MGI:1921520]	+	gene	Name match	0	0.000983182	0.00479874	-5.73182	-11.44	-17.3506	-24.598	-11.7791	-25.8413	-25.6374	-21.171	-20.0743	-16.8031	-21.3277	-18.1958	-18.6031	-22.2882	-16.6113	-20.8241	-17.4749	-18.6203	-19.3454	-17.5081	-15.1687	-15.2219	-19.5232	-19.2586	-12.8725	-12.4274	-13.8758	-15.8489	-14.5756	-15.3254	-18.2293	-16.9842	-16.5883	-17.6897	-19.3376	-19.2745
Fnbp1	2	31026206	31142008	-	Fnbp1	ENSMUSG00000075415	formin binding protein 1 [Source:MGI Symbol;Acc:MGI:109606]	-	gene	Name match	0	1.53484e-06	1.12934e-05	-6.6674	-9.09811	-15.6063	-16.142	-10.9958	-17.3467	-15.5547	-13.1775	-14.9665	-10.7895	-13.4365	-11.5537	-10.8167	-15.7226	-10.7468	-14.8017	-10.7386	-13.9782	-13.1184	-11.7348	-10.1288	-8.25784	-13.836	-20.7457	-14.3597	-13.9146	-9.21095	-8.89872	-9.10338	-7.85324	-12.3846	-10.0432	-10.6756	-11.1731	-12.5383	-13.4701
D330023K18Rik	2	31146457	31152291	-	D330023K18Rik	ENSMUSG00000087269	RIKEN cDNA D330023K18 gene [Source:MGI Symbol;Acc:MGI:2445152]	-	gene	Name match	0	0.000770705	0.00383692	-6.62095	-16.7571	-21.2789	-14.752	-10.4701	-23.0176	-22.8138	-18.3474	-17.2506	-13.9795	-18.5041	-15.3722	-11.8201	-19.4646	-13.7877	-18.0005	-14.6513	-15.7967	-16.5218	-14.6845	-12.3451	-12.3983	-16.6995	-16.4349	-10.0489	-9.6038	-11.0522	-13.0253	-11.7519	-12.5018	-10.7301	-14.1605	-13.7647	-14.8661	-16.514	-16.4508
Gpr107	2	31152316	31218775	+	Gpr107	ENSMUSG00000000194	G protein-coupled receptor 107 [Source:MGI Symbol;Acc:MGI:2139054]	+	gene	Name match	0	4.83434e-09	5.04424e-08	-6.42275	-12.1148	-18.2103	-16.4316	-11.1724	-22.4684	-20.3386	-18.3831	-15.3989	-13.2497	-16.3072	-13.6006	-14.1829	-17.5744	-12.5604	-15.1102	-13.1021	-13.8325	-20.0315	-14.2348	-12.3808	-15.9079	-15.7353	-19.9446	-13.5585	-13.1135	-9.50295	-12.2955	-10.8617	-16.0115	-18.9154	-11.8744	-11.1682	-13.2237	-20.0237	-14.7641
Hmcn2	2	31314415	31460738	+	Hmcn2	ENSMUSG00000055632	hemicentin 2 [Source:MGI Symbol;Acc:MGI:2677838]	+	gene	Name match	0	0.000180447	0.000994317	-2.6713	-11.4032	-15.9566	-17.2962	-10.7659	-20.4586	-19.1006	-14.5583	-16.3894	-11.3058	-14.5492	-12.1961	-12.1936	-15.9002	-10.2561	-14.9043	-12.5477	-12.8668	-15.5262	-13.5661	-11.5935	-9.5195	-14.1406	-17.1239	-14.6972	-14.2521	-10.4192	-11.5909	-10.0783	-11.7502	-13.2438	-11.2731	-10.8773	-12.0586	-15.1523	-13.0768
Fubp3	2	31572651	31617526	+	Fubp3	ENSMUSG00000026843	far upstream element (FUSE) binding protein 3 [Source:MGI Symbol;Acc:MGI:2443699]	+	gene	Name match	0	1.25312e-06	9.3305e-06	-3.67227	-11.2768	-14.7436	-14.3573	-10.0209	-18.3493	-18.7594	-14.3836	-14.3979	-8.95042	-13.3179	-10.8414	-11.047	-13.8592	-8.55093	-15.2066	-10.5355	-11.9014	-12.585	-10.1719	-9.70996	-11.489	-13.2239	-19.3781	-12.992	-12.5469	-10.5214	-8.49454	-7.81516	-9.64908	-12.2661	-11.1968	-9.20711	-10.9157	-12.3051	-12.1652
Gm13425	2	31633453	31640589	-	Gm13425	ENSMUSG00000085224	predicted gene 13425 [Source:MGI Symbol;Acc:MGI:3649915]	-	gene	Name match	0	0.00140344	0.00665645	5.73311	-9.18143	-16.33	-17.591	-8.26424	-18.6968	-17.7824	-14.0265	-17.5412	-10.3107	-14.9422	-9.17094	-9.63264	-14.9594	-8.11893	-12.2564	-10.146	-12.4759	-13.201	-9.46555	-7.43928	-7.95188	-10.4983	-16.7255	-10.3395	-9.89438	-6.33276	-13.3159	-5.93633	-8.05542	-10.9004	-9.83969	-7.73336	-8.81481	-11.7457	-10.304
Aif1l	2	31950139	31973442	+	Aif1l	ENSMUSG00000001864	allograft inflammatory factor 1-like [Source:MGI Symbol;Acc:MGI:1919598]	+	gene	Name match	0	2.96957e-05	0.000182224	-7.64489	-12.1935	-23.2766	-16.6894	-16.4272	-25.0154	-24.8116	-15.2863	-19.2484	-15.9772	-20.5018	-12.4106	-17.7772	-21.4624	-15.7855	-16.0389	-16.6491	-17.7945	-18.5196	-16.6823	-14.3429	-14.396	-18.6973	-18.4327	-12.0466	-11.6016	-13.0499	-15.0231	-13.7497	-14.4996	-17.4035	-16.1583	-15.7625	-16.8638	-18.5118	-18.4486
Nup214	2	31974436	32053975	+	Nup214	ENSMUSG00000001855	nucleoporin 214 [Source:MGI Symbol;Acc:MGI:1095411]	+	gene	Name match	0	8.89324e-11	1.17013e-09	-5.00716	-11.4701	-20.3108	-17.1105	-12.4316	-26.7865	-26.5827	-22.1163	-21.0195	-17.7483	-22.273	-19.1411	-19.5483	-23.2335	-17.5566	-17.4474	-14.9462	-19.5656	-20.2907	-18.4534	-16.114	-16.1671	-20.4684	-20.2038	-13.8177	-13.3727	-14.821	-16.7942	-15.5208	-16.2707	-19.1746	-17.9294	-17.5336	-13.2735	-20.2829	-15.6754
Prrc2b	2	32151082	32234537	+	Prrc2b	ENSMUSG00000039262	proline-rich coiled-coil 2B [Source:MGI Symbol;Acc:MGI:1923304]	+	gene	Name match	0	0.000485323	0.00249901	-2.06359	-12.388	-17.2169	-15.87	-13.8677	-19.871	-26.652	-18.4486	-21.0889	-17.8177	-22.3423	-19.2104	-15.0734	-23.3028	-12.2645	-16.6423	-13.1676	-19.6349	-20.36	-18.5227	-11.7094	-16.2365	-20.5378	-20.2732	-13.8871	-13.442	-14.8904	-10.8536	-15.5901	-16.34	-13.5683	-11.8925	-13.3634	-14.8518	-20.3522	-20.2891
Uck1	2	32255002	32260159	-	Uck1	ENSMUSG00000002550	uridine-cytidine kinase 1 [Source:MGI Symbol;Acc:MGI:98904]	-	gene	Name match	0	0.00497918	0.0215825	-3.21346	-16.5792	-21.1009	-21.5965	-14.2515	-19.5178	-22.6359	-18.1695	-17.0727	-13.8015	-18.3262	-15.1943	-15.6015	-19.2867	-9.06546	-17.8225	-14.4734	-15.6188	-16.3439	-14.5066	-12.1672	-12.2203	-16.5216	-16.257	-9.87095	-9.42587	-10.8742	-12.8474	-11.574	-12.3239	-15.2278	-13.9826	-13.5868	-14.6881	-16.3361	-16.2729
Swi5	2	32278816	32288075	-	Swi5	ENSMUSG00000044627	SWI5 recombination repair homolog (yeast) [Source:MGI Symbol;Acc:MGI:1920181]	-	gene	Name match	0	1.45193e-10	1.8555e-09	-4.329	-11.3645	-14.5547	-22.4407	-10.2999	-19.21	-23.4801	-13.7324	-17.9169	-14.6457	-19.1704	-16.0385	-16.4457	-20.1309	-14.454	-18.6667	-15.3176	-16.463	-17.1881	-15.3508	-13.0114	-13.0645	-17.3658	-17.1012	-10.7151	-10.2701	-11.7184	-13.6916	-12.4182	-13.1681	-16.072	-14.8268	-14.431	-15.5323	-17.1803	-12.6432
Golga2	2	32287384	32307921	+	Golga2	ENSMUSG00000002546	golgi autoantigen, golgin subfamily a, 2 [Source:MGI Symbol;Acc:MGI:2139395]	+	gene	Name match	0	9.91378e-06	6.57305e-05	-6.25167	-10.5137	-23.0943	-18.6305	-8.04853	-21.0962	-24.6293	-13.7629	-19.0661	-15.795	-20.3196	-17.1877	-17.595	-17.1281	-15.6032	-19.816	-16.4668	-17.6122	-18.3373	-16.5	-14.1606	-14.2137	-18.515	-12.9285	-11.8644	-11.4193	-12.8677	-14.8408	-13.5674	-14.3173	-17.2212	-15.976	-15.5802	-16.6815	-18.3295	-18.2663
Dnm1	2	32308471	32353338	-	Dnm1	ENSMUSG00000026825	dynamin 1 [Source:MGI Symbol;Acc:MGI:107384]	-	gene	Name match	0	1.0443e-14	2.25533e-13	-6.22451	-9.65619	-14.3082	-19.0107	-11.3874	-20.0536	-19.4347	-17.6788	-20.1935	-8.47572	-21.447	-18.3151	-13.0785	-22.4075	-16.7306	-20.9433	-17.5942	-13.6807	-19.4647	-17.6274	-15.288	-15.3411	-19.6424	-19.3778	-12.9917	-12.5467	-13.995	-11.5683	-14.6948	-15.4447	-14.2897	-12.7035	-12.3076	-13.1334	-19.4569	-19.3937
Ciz1	2	32352327	32380970	+	Ciz1	ENSMUSG00000039205	CDKN1A interacting zinc finger protein 1 [Source:MGI Symbol;Acc:MGI:1920234]	+	gene	Name match	0	1.43037e-10	1.83255e-09	-6.16631	-9.94924	-17.6674	-18.5602	-10.2509	-8.17714	-21.1499	-20.6428	-19.5461	-16.2749	-20.7995	-17.6676	-18.0749	-21.7601	-16.0831	-20.2959	-11.2098	-13.0333	-18.8172	-16.9799	-14.6405	-14.6937	-18.995	-18.7304	-12.3443	-11.8992	-13.3476	-15.3208	-14.0474	-14.7972	-11.8212	-16.456	-16.0601	-8.7427	-18.8094	-18.7463
1110008P14Rik	2	32377097	32381938	-	1110008P14Rik	ENSMUSG00000039195	RIKEN cDNA 1110008P14 gene [Source:MGI Symbol;Acc:MGI:1920987]	-	gene	Name match	0	1.59968e-08	1.54629e-07	-3.54154	-16.488	-21.0097	-18.0313	-14.1603	-5.31495	-22.5447	-18.0782	-16.9815	-13.7103	-18.2349	-15.1031	-15.5103	-19.1955	-13.5186	-17.7313	-14.3822	-15.5276	-16.2527	-14.4154	-12.076	-12.1291	-16.4304	-16.1658	-9.77974	-9.33467	-10.783	-12.7562	-11.4828	-12.2327	-15.1366	-13.8914	-13.4956	-14.5969	-16.2448	-16.1817
Ptges2	2	32395896	32405772	+	Ptges2	ENSMUSG00000026820	prostaglandin E synthase 2 [Source:MGI Symbol;Acc:MGI:1917592]	+	gene	Name match	0	0.000940142	0.00460338	-6.76134	-9.905	-22.0382	-17.2942	-15.1888	-23.777	-18.8976	-19.1067	-18.01	-10.4169	-19.2634	-16.1315	-16.5388	-20.224	-10.395	-18.7598	-15.4106	-11.7036	-17.2812	-10.9699	-13.1044	-13.1576	-17.4589	-17.1943	-10.8082	-10.3631	-11.8115	-13.7847	-12.5113	-13.2611	-16.165	-14.9199	-14.524	-15.6254	-17.2733	-17.2102
Slc25a25	2	32414487	32451445	-	Slc25a25	ENSMUSG00000026819	solute carrier family 25 (mitochondrial carrier, phosphate carrier), member 25 [Source:MGI Symbol;Acc:MGI:1915913]	-	gene	Name match	0	4.04839e-06	2.83427e-05	-7.75566	-11.61	-17.2822	-15.5407	-17.0926	-19.7474	-20.8013	-21.0105	-19.9138	-16.6426	-21.1672	-18.0353	-18.4426	-22.1278	-11.2988	-20.6636	-17.3144	-18.4599	-19.1849	-17.3476	-15.0082	-15.0614	-19.3627	-19.0981	-12.712	-12.2669	-13.7153	-15.6885	-14.4151	-15.1649	-18.0688	-16.8237	-16.4278	-17.5292	-19.1771	-19.114
Fam102a	2	32535332	32569756	+	Fam102a	ENSMUSG00000039157	family with sequence similarity 102, member A [Source:MGI Symbol;Acc:MGI:2138935]	+	gene	Name match	0	2.5436e-09	2.74581e-08	-5.1877	-12.1323	-23.8395	-20.0956	-12.3787	-25.5783	-25.3744	-20.908	-19.8113	-16.5401	-21.0647	-17.9329	-18.3401	-17.2883	-16.3484	-20.5611	-17.2119	-18.3574	-19.0825	-17.2452	-14.9057	-14.9589	-19.2602	-18.9956	-12.6095	-12.1644	-13.6128	-15.586	-14.3126	-15.0625	-17.9663	-16.7212	-16.3253	-17.4267	-19.0746	-19.0115
Dpm2	2	32570858	32573579	+	Dpm2	ENSMUSG00000026810	dolichol-phosphate (beta-D) mannosyltransferase 2 [Source:MGI Symbol;Acc:MGI:1330238]	+	gene	Name match	0	1.79478e-08	1.72737e-07	-3.42778	-11.0456	-20.1788	-20.6743	-13.3294	-21.9176	-21.7137	-17.2473	-16.1506	-4.50339	-17.404	-14.2721	-14.6794	-18.3646	-12.6876	-16.9004	-13.5512	-14.6967	-15.4217	-13.5845	-11.245	-11.2982	-15.5995	-15.3349	-8.9488	-8.50373	-9.9521	-11.9253	-10.6519	-11.4017	-14.3056	-13.0605	-12.6646	-13.766	-15.4139	-15.3508
Ak1	2	32621758	32635058	+	Ak1	ENSMUSG00000026817	adenylate kinase 1 [Source:MGI Symbol;Acc:MGI:87977]	+	gene	Name match	0	5.03798e-05	0.000299644	-2.62399	-10.15	-22.4676	-13.5823	-15.6182	-6.94574	-4.26249	-19.5361	-18.4394	-15.1682	-19.6928	-16.5609	-16.9682	-20.6534	-14.9764	-19.1892	-15.84	-16.9855	-17.7105	-7.48763	-13.5338	-7.02559	-13.1513	-17.6237	-11.2376	-10.7925	-12.2409	-14.2141	-4.95578	-13.6905	-16.5944	-15.3493	-14.9534	-8.9255	-17.7027	-17.6396
Eng	2	32646595	32682669	+	Eng	ENSMUSG00000026814	endoglin [Source:MGI Symbol;Acc:MGI:95392]	+	gene	Name match	0	3.04369e-18	1.02486e-16	-6.04663	-10.9069	-23.907	-17.8076	-17.0576	-25.6458	-20.042	-13.8578	-19.8788	-16.6077	-21.1323	-18.0004	-18.4077	-16.2129	-16.4159	-20.6287	-17.2795	-18.4249	-14.0911	-17.3127	-14.9733	-15.0265	-19.3277	-19.0631	-12.6771	-12.232	-13.6804	-15.6535	-14.3801	-15.13	-18.0339	-16.7887	-16.3929	-17.4943	-19.1422	-19.079
Cdk9	2	32705784	32713076	-	Cdk9	ENSMUSG00000009555	cyclin-dependent kinase 9 (CDC2-related kinase) [Source:MGI Symbol;Acc:MGI:1328368]	-	gene	Name match	0	1.07354e-05	7.08897e-05	-7.78537	-12.3419	-16.9892	-13.7057	-14.7512	-23.3394	-19.6616	-18.6692	-17.5724	-14.3012	-18.8259	-15.694	-16.1012	-19.7864	-14.1095	-18.3222	-14.9731	-16.1185	-16.8436	-15.0063	-12.6669	-12.72	-17.0213	-16.7567	-10.3706	-9.92557	-11.3739	-13.3471	-12.0737	-12.8236	-15.7275	-14.4823	-14.0865	-10.392	-16.8358	-16.7726
Tor2a	2	32757234	32762244	+	Tor2a	ENSMUSG00000009563	torsin family 2, member A [Source:MGI Symbol;Acc:MGI:1353596]	+	gene	Name match	0	0.00705299	0.0299371	-1.55123	-16.5375	-21.0592	-21.5547	-14.2098	-22.798	-22.5941	-18.1277	-17.031	-13.7598	-18.2844	-15.1526	-10.9484	-19.245	-13.5681	-17.7808	-14.4317	-15.5771	-16.3022	-14.4649	-12.1255	-12.1786	-12.421	-16.2153	-9.82923	-9.38416	-10.8325	-12.8057	-11.5323	-12.2822	-15.186	-13.9409	-13.5451	-14.6464	-16.2943	-16.2312
Stxbp1	2	32787602	32847245	-	Stxbp1	ENSMUSG00000026797	syntaxin binding protein 1 [Source:MGI Symbol;Acc:MGI:107363]	-	gene	Name match	0	2.81127e-05	0.000173077	-5.19348	-12.1195	-11.1698	-16.3393	-9.53298	-21.6342	-19.0041	-15.5947	-17.1303	-17.333	-21.8576	-18.7258	-19.133	-17.3087	-17.1413	-21.354	-18.0049	-19.1503	-19.8754	-13.9792	-15.6987	-15.7518	-20.0531	-19.7885	-13.4024	-12.9574	-14.4057	-16.3789	-15.1055	-15.8554	-18.7593	-10.4314	-11.3224	-18.2196	-19.8675	-19.8044
Rpl12	2	32961559	32965345	+	Rpl12	ENSMUSG00000038900	ribosomal protein L12 [Source:MGI Symbol;Acc:MGI:98002]	+	gene	Name match	0	3.12762e-07	2.54551e-06	-2.90285	-9.23995	-20.6552	-21.1507	-13.8058	-8.04582	-16.9506	-17.7237	-16.627	-13.3558	-17.8804	-14.7485	-15.1558	-18.841	-13.164	-17.3768	-14.0276	-15.1731	-15.8981	-14.0608	-11.7214	-11.7746	-16.0759	-15.8113	-9.42519	-8.98012	-10.4285	-12.4017	-11.1283	-11.8781	-14.782	-13.5369	-13.141	-14.2424	-15.8903	-15.8272
Angptl2	2	33216069	33247717	+	Angptl2	ENSMUSG00000004105	angiopoietin-like 2 [Source:MGI Symbol;Acc:MGI:1347002]	+	gene	Name match	0	4.09173e-26	3.02134e-24	-9.74201	-11.199	-23.7182	-16.9637	-12.1318	-25.457	-21.1942	-20.7867	-19.69	-16.4188	-20.9434	-17.8116	-13.4819	-21.904	-12.4901	-20.4398	-17.0907	-14.1772	-18.9612	-17.1239	-14.7844	-14.8376	-19.1389	-18.8743	-12.4882	-12.0431	-13.4915	-11.7277	-14.1913	-14.9412	-17.845	-16.5999	-16.2041	-17.3054	-18.9533	-18.8902
Zbtb43	2	33450287	33468559	-	Zbtb43	ENSMUSG00000026788	zinc finger and BTB domain containing 43 [Source:MGI Symbol;Acc:MGI:1919084]	-	gene	Name match	0	0.0029413	0.013216	-4.84721	-11.4318	-14.5354	-14.7147	-10.6389	-24.6645	-24.4607	-19.9943	-13.4601	-15.6264	-20.151	-17.0191	-17.4264	-21.1115	-15.4346	-19.6474	-16.2982	-17.4436	-18.1687	-16.3314	-13.992	-14.0452	-12.6095	-18.0819	-11.6958	-11.2507	-12.6991	-14.6722	-13.3988	-14.1487	-17.0526	-10.37	-15.4116	-16.513	-18.1609	-12.5882
Pbx3	2	34171457	34373142	-	Pbx3	ENSMUSG00000038718	pre B cell leukemia homeobox 3 [Source:MGI Symbol;Acc:MGI:97496]	-	gene	Name match	0	5.94028e-06	4.06031e-05	-7.12126	-10.7834	-16.8696	-17.6621	-11.873	-21.9325	-21.8904	-16.9668	-16.3519	-19.0907	-18.1058	-15.2022	-15.6094	-24.5759	-13.7927	-16.5847	-19.7625	-20.908	-16.8961	-19.7958	-17.4563	-12.148	-16.4493	-21.5462	-15.1601	-14.715	-16.1634	-18.1366	-11.6237	-11.8172	-15.9726	-19.2718	-18.8759	-19.9773	-21.6252	-15.1433
Hspa5	2	34771970	34777547	+	Hspa5	ENSMUSG00000026864	heat shock protein 5 [Source:MGI Symbol;Acc:MGI:95835]	+	gene	Name match	0	5.57091e-32	7.10661e-30	-6.78967	-12.0165	-21.2139	-13.2087	-14.3645	-22.9527	-22.7488	-18.2824	-17.1857	-5.52407	-18.4391	-6.88376	-10.9775	-19.3996	-13.7227	-13.083	-14.5863	-15.7317	-16.4568	-14.6195	-12.2801	-12.3333	-16.6346	-16.37	-9.98388	-9.53881	-10.9872	-12.9603	-11.687	-12.4368	-15.3407	-14.0956	-13.6997	-14.8011	-16.449	-16.3859
Rabepk	2	34777556	34799912	-	Rabepk	ENSMUSG00000070953	Rab9 effector protein with kelch motifs [Source:MGI Symbol;Acc:MGI:2139530]	-	gene	Name match	0	1.8757e-06	1.36297e-05	-7.39738	-10.8777	-23.2168	-14.9456	-16.3674	-24.9556	-24.7517	-20.2853	-19.1886	-15.9174	-20.442	-17.3101	-17.7174	-21.4026	-15.7256	-19.9384	-16.5892	-17.7347	-18.4597	-16.6224	-14.283	-14.3362	-18.6375	-18.3729	-11.9868	-11.5417	-12.9901	-10.7238	-13.6899	-14.4397	-17.3436	-16.0985	-15.7026	-16.804	-18.4519	-18.3888
Fbxw2	2	34804514	34826311	-	Fbxw2	ENSMUSG00000035949	F-box and WD-40 domain protein 2 [Source:MGI Symbol;Acc:MGI:1353435]	-	gene	Name match	0	6.84297e-05	0.000399259	-2.50975	-14.0471	-16.8785	-23.6758	-16.3308	-24.919	-18.0874	-20.2488	-14.2996	-11.2053	-20.4055	-17.2736	-17.6809	-21.366	-15.6891	-19.9019	-16.5527	-17.6981	-18.4232	-16.5859	-14.2465	-14.2996	-18.6009	-18.3363	-11.9503	-11.5052	-12.9536	-14.9267	-13.6533	-14.4032	-17.3071	-16.0619	-15.6661	-16.7674	-18.4154	-18.3522
Psmd5	2	34849734	34874968	-	Psmd5	ENSMUSG00000026869	proteasome (prosome, macropain) 26S subunit, non-ATPase, 5 [Source:MGI Symbol;Acc:MGI:1914248]	-	gene	Name match	0	6.17907e-08	5.56054e-07	-7.97952	-12.8597	-14.7597	-17.5062	-10.9977	-25.1303	-24.9264	-20.46	-19.3633	-16.0921	-20.6167	-17.4848	-17.8921	-21.5773	-15.9003	-20.1131	-16.7639	-17.9094	-18.6344	-12.0013	-14.4577	-14.5109	-18.8122	-18.5476	-12.1615	-11.7164	-13.1648	-15.138	-13.8646	-14.6144	-17.5183	-16.2732	-15.8773	-16.9787	-18.6266	-18.5635
Cntrl	2	35109492	35178822	+	Cntrl	ENSMUSG00000057110	centriolin [Source:MGI Symbol;Acc:MGI:1889576]	+	gene	Name match	0	3.50965e-14	7.09323e-13	-9.66773	-12.062	-24.8495	-25.3451	-11.5444	-26.5883	-22.4251	-15.8834	-16.0255	-17.5502	-15.9686	-18.9429	-14.0282	-23.0353	-17.3584	-21.5712	-18.222	-19.3674	-20.0925	-18.2552	-10.4062	-15.969	-20.2702	-20.0056	-13.6196	-13.1745	-14.6229	-16.596	-15.3226	-16.0725	-18.9764	-17.7312	-17.3354	-14.0368	-20.0847	-20.0215
Rab14	2	35180205	35201120	-	Rab14	ENSMUSG00000026878	RAB14, member RAS oncogene family [Source:MGI Symbol;Acc:MGI:1915615]	-	gene	Name match	0	2.61719e-13	4.72595e-12	-4.25243	-9.41347	-16.9026	-23.6162	-16.2712	-8.59231	-24.6556	-20.1892	-19.0924	-15.8213	-20.3459	-12.6026	-17.6213	-21.3064	-15.6295	-19.8423	-16.4931	-17.6385	-18.3636	-16.5263	-14.1869	-14.2401	-18.5414	-18.2768	-11.8907	-11.4456	-12.894	-8.27219	-13.5937	-14.3436	-17.2475	-16.0023	-15.6065	-16.7079	-18.3558	-18.2927
Gsn	2	35256380	35307892	+	Gsn	ENSMUSG00000026879	gelsolin [Source:MGI Symbol;Acc:MGI:95851]	+	gene	Name match	0	2.0743e-30	2.26461e-28	-7.69474	-11.7872	-20.4616	-20.5166	-10.9601	-26.1598	-25.9559	-17.25	-14.5683	-7.06721	-21.6462	-10.1239	-18.9216	-13.6999	-16.9298	-14.2224	-17.7934	-10.5677	-19.6639	-17.8267	-15.4872	-11.1405	-19.8417	-19.5771	-13.191	-12.7459	-14.1943	-16.1675	-10.7421	-15.6439	-18.5478	-17.3027	-16.9068	-18.0082	-19.6561	-19.593
Dab2ip	2	35558266	35730994	+	Dab2ip	ENSMUSG00000026883	disabled 2 interacting protein [Source:MGI Symbol;Acc:MGI:1916851]	+	gene	Name match	0	0.00113969	0.00550225	-4.41499	-11.8725	-17.5799	-15.8971	-12.0565	-24.7533	-27.7014	-16.6236	-17.1789	-13.0712	-23.3917	-14.353	-15.4276	-24.3523	-18.6753	-22.8881	-19.5389	-15.488	-17.557	-19.5722	-17.2327	-12.49	-21.5872	-21.3226	-14.9365	-14.4914	-15.9398	-17.913	-12.6802	-17.3894	-20.2933	-15.0888	-18.6523	-13.4932	-21.4016	-21.3385
Ndufa8	2	36036326	36049406	-	Ndufa8	ENSMUSG00000026895	NADH:ubiquinone oxidoreductase subunit A8 [Source:MGI Symbol;Acc:MGI:1915625]	-	gene	Name match	0	2.10671e-10	2.62535e-09	-3.90348	-11.9624	-22.4435	-22.939	-15.5941	-6.67909	-23.9785	-19.512	-18.4153	-10.4072	-19.6687	-16.5369	-16.9441	-20.6293	-14.9524	-19.1651	-15.816	-16.9614	-17.6865	-15.8492	-13.5098	-13.5629	-17.8642	-17.5996	-11.2135	-10.7685	-12.2168	-14.19	-12.9166	-13.6665	-16.5704	-15.3252	-14.9294	-16.0307	-17.6786	-17.6155
Rbm18	2	36116079	36136773	-	Rbm18	ENSMUSG00000026889	RNA binding motif protein 18 [Source:MGI Symbol;Acc:MGI:1915139]	-	gene	Name match	0	9.31787e-08	8.18239e-07	-3.94942	-10.1278	-23.1053	-15.2104	-16.2559	-24.8441	-24.6403	-20.1739	-19.0771	-15.8059	-20.3306	-17.1987	-17.6059	-21.2911	-15.6142	-19.8269	-16.4778	-17.6232	-18.3483	-16.511	-14.1716	-14.2247	-18.526	-18.2614	-11.8753	-11.4303	-12.8786	-14.8518	-13.5784	-14.3283	-17.2322	-15.987	-15.5912	-16.6925	-18.3405	-18.2773
Mrrf	2	36136389	36190647	+	Mrrf	ENSMUSG00000026887	mitochondrial ribosome recycling factor [Source:MGI Symbol;Acc:MGI:1915121]	+	gene	Name match	0	0.000472951	0.00243953	-2.08566	-11.8738	-16.1151	-24.9914	-17.6465	-26.2347	-26.0308	-17.2425	-20.4677	-17.1965	-21.7211	-18.5893	-18.9965	-17.6228	-17.0048	-21.2175	-13.324	-19.0138	-19.7389	-17.9016	-15.5622	-15.6153	-19.9166	-19.652	-13.2659	-12.8209	-14.2692	-16.2424	-14.969	-15.7189	-18.6227	-17.3776	-16.9818	-18.0831	-19.731	-19.6679
Pdcl	2	37350074	37359332	-	Pdcl	ENSMUSG00000009030	phosducin-like [Source:MGI Symbol;Acc:MGI:1914716]	-	gene	Name match	0	1.98338e-09	2.16935e-08	-8.44226	-9.23779	-15.3011	-14.9847	-6.35485	-17.4657	-18.2835	-19.0135	-17.9168	-9.49358	-12.9958	-10.757	-9.20612	-12.6478	-6.89243	-18.6666	-9.12102	-10.2448	-11.9485	-10.0287	-6.48417	-7.82491	-12.1693	-17.1011	-10.715	-10.2699	-11.7183	-13.6915	-12.4181	-5.65837	-16.0718	-9.58719	-9.19136	-9.29271	-9.93007	-10.795
Rc3h2	2	37370069	37422903	-	Rc3h2	ENSMUSG00000075376	ring finger and CCCH-type zinc finger domains 2 [Source:MGI Symbol;Acc:MGI:2442789]	-	gene	Name match	0	3.36678e-12	5.36379e-11	-7.619	-12.5646	-19.9836	-24.9531	-12.2467	-26.1963	-25.9925	-21.5261	-15.885	-17.1581	-16.3213	-18.5509	-18.9581	-22.6433	-16.9664	-21.1792	-12.9775	-15.123	-19.7005	-10.9563	-15.5238	-15.5769	-19.8782	-19.6136	-13.2276	-12.7825	-14.2309	-12.052	-14.9306	-15.6805	-13.4324	-12.8653	-16.9434	-18.0447	-19.6927	-15.4775
Zbtb6	2	37425500	37443171	-	Zbtb6	ENSMUSG00000066798	zinc finger and BTB domain containing 6 [Source:MGI Symbol;Acc:MGI:2442998]	-	gene	Name match	0	0.00494638	0.0214691	-3.56474	-9.8462	-13.9182	-23.373	-11.2911	-24.6163	-24.4124	-15.1502	-18.8493	-15.5781	-16.3658	-16.9709	-17.3781	-17.7414	-15.3864	-19.5991	-12.513	-17.3954	-18.1205	-12.2243	-13.9438	-9.93802	-18.2982	-18.0336	-11.6475	-11.2025	-12.6508	-14.624	-13.3506	-14.1005	-17.0043	-15.7592	-15.3634	-16.4647	-18.1126	-18.0495
Rabgap1	2	37443279	37566454	+	Rabgap1	ENSMUSG00000035437	RAB GTPase activating protein 1 [Source:MGI Symbol;Acc:MGI:2385139]	+	gene	Name match	0	0.0101222	0.0417014	-1.8133	-11.4087	-7.75757	-8.69842	-11.0774	-20.4453	-20.9323	-17.4253	-16.7436	-12.4199	-16.7746	-19.7721	-12.42	-18.5832	-10.896	-22.4003	-12.2992	-15.7966	-15.8628	-13.7624	-13.1335	-16.7981	-16.4238	-20.8348	-14.4487	-14.0036	-15.452	-17.4252	-16.1518	-13.5797	-15.1941	-14.601	-18.1645	-12.5593	-13.6325	-16.5288
Dennd1a	2	37798991	38287390	-	Dennd1a	ENSMUSG00000035392	DENN/MADD domain containing 1A [Source:MGI Symbol;Acc:MGI:2442794]	-	gene	Name match	0	0.000155507	0.000863981	-5.50734	-11.6879	-17.0752	-16.8861	-13.8317	-29.4048	-24.191	-16.5004	-23.6378	-20.3666	-20.9319	-21.7594	-18.3142	-17.4758	-16.3224	-17.9319	-14.1316	-16.5401	-16.3647	-13.5799	-18.7323	-11.3667	-23.0867	-22.8221	-16.4361	-15.991	-17.4393	-19.4125	-12.7777	-18.889	-21.7929	-12.0559	-11.669	-14.3464	-15.473	-16.7318
Nek6	2	38511643	38594606	+	Nek6	ENSMUSG00000026749	NIMA (never in mitosis gene a)-related expressed kinase 6 [Source:MGI Symbol;Acc:MGI:1891638]	+	gene	Name match	0	4.13931e-05	0.000249445	-2.55396	-12.0468	-19.9121	-18.386	-12.7496	-10.4245	-26.6435	-16.6675	-21.0803	-17.8091	-16.4004	-15.3494	-19.6091	-23.2943	-13.0059	-21.8301	-18.481	-15.0821	-20.3515	-18.5142	-16.1748	-16.2279	-20.5292	-20.2646	-13.8785	-13.4335	-14.8818	-16.855	-15.5816	-11.2253	-19.2354	-9.60939	-12.9188	-14.9588	-20.3437	-13.7191
Psmb7	2	38588036	38644087	-	Psmb7	ENSMUSG00000026750	proteasome (prosome, macropain) subunit, beta type 7 [Source:MGI Symbol;Acc:MGI:107637]	-	gene	Name match	0	5.52887e-08	4.99944e-07	-3.47329	-11.1514	-17.7615	-17.1381	-9.07379	-8.87148	-18.577	-15.5767	-20.5146	-9.58362	-13.7895	-12.2362	-11.5251	-15.0374	-8.82819	-13.9526	-11.1783	-12.294	-13.6338	-9.44333	-8.79884	-8.31054	-13.125	-15.64	-13.3128	-12.8678	-7.9743	-9.49343	-8.03101	-9.38494	-11.4302	-8.49113	-9.89938	-10.327	-12.4263	-12.071
Wdr38	2	38997476	39006168	+	Wdr38	ENSMUSG00000035295	WD repeat domain 38 [Source:MGI Symbol;Acc:MGI:1923896]	+	gene	Name match	0	3.30336e-22	1.61942e-20	-4.56538	-7.729	-21.854	-22.3495	-10.4602	-8.49879	-23.3889	-18.9225	-17.8258	-14.5546	-14.1723	-15.9473	-11.8807	-20.0398	-14.3628	-13.6687	-10.6821	-16.3719	-17.0969	-15.2596	-12.9202	-12.9734	-17.2747	-17.0101	-10.624	-10.1789	-11.6273	-13.6005	-12.3271	-13.0769	-15.9808	-14.7357	-14.3398	-15.4412	-17.0891	-17.026
Rpl35	2	39001580	39005624	-	Rpl35	ENSMUSG00000062997	ribosomal protein L35 [Source:MGI Symbol;Acc:MGI:1913739]	-	gene	Name match	0	1.69485e-36	3.22575e-34	-4.86662	-6.84288	-20.7503	-21.2458	-9.35653	-7.39508	-22.2852	-17.8188	-16.722	-13.4509	-13.0686	-14.8436	-15.2509	-18.936	-13.2591	-12.565	-14.1227	-15.2681	-15.9932	-14.1559	-11.8165	-11.8697	-16.171	-15.9064	-9.52027	-9.0752	-10.5236	-12.4967	-11.2233	-11.9732	-14.8771	-13.6319	-13.2361	-14.3375	-15.9854	-15.9223
Arpc5l	2	39005348	39015877	+	Arpc5l	ENSMUSG00000026755	actin related protein 2/3 complex, subunit 5- like [Source:MGI Symbol;Acc:MGI:1921442]	+	gene	Name match	0	1.25894e-05	8.23805e-05	-2.56999	-13.2869	-22.1306	-22.6261	-15.2811	-8.18048	-23.6655	-14.0027	-18.1023	-7.69047	-19.3558	-16.2239	-16.6312	-20.3163	-14.6394	-18.8522	-15.503	-16.6484	-17.3735	-15.5362	-13.1968	-13.25	-17.5512	-17.2866	-10.9006	-10.4555	-11.9039	-13.877	-12.6036	-13.3535	-16.2574	-15.0122	-14.6164	-15.7178	-17.3657	-17.3025
Golga1	2	39016155	39065541	-	Golga1	ENSMUSG00000026754	golgi autoantigen, golgin subfamily a, 1 [Source:MGI Symbol;Acc:MGI:1924149]	-	gene	Name match	0	2.43727e-05	0.000151507	-6.99791	-13.1946	-24.3602	-16.1225	-12.8352	-22.625	-25.8951	-16.0672	-20.332	-17.0608	-16.626	-18.4535	-18.8608	-15.5236	-16.869	-21.0818	-17.7326	-18.8781	-15.5442	-17.7658	-10.5195	-15.4796	-15.722	-19.5163	-13.1302	-12.6851	-14.1335	-16.1067	-14.8333	-15.5831	-18.487	-17.2419	-16.846	-17.9474	-19.5953	-15.4733
Scai	2	39066214	39190734	-	Scai	ENSMUSG00000035236	suppressor of cancer cell invasion [Source:MGI Symbol;Acc:MGI:2443716]	-	gene	Name match	0	0.00011168	0.000633335	-2.95784	-11.9491	-16.0994	-17.0072	-13.835	-22.4738	-22.0329	-16.441	-15.5834	-14.4356	-16.8134	-19.7877	-14.1122	-16.6196	-10.9744	-15.6346	-13.8273	-14.083	-14.978	-12.3631	-16.7606	-16.8138	-21.1151	-20.8505	-9.35818	-14.0193	-15.4677	-12.2014	-11.2081	-16.9173	-19.8212	-13.2948	-11.7244	-13.575	-14.1481	-15.7602
Ppp6c	2	39194354	39226451	-	Ppp6c	ENSMUSG00000026753	protein phosphatase 6, catalytic subunit [Source:MGI Symbol;Acc:MGI:1915107]	-	gene	Name match	0	2.15612e-15	5.12272e-14	-5.38833	-11.9355	-16.8451	-24.2341	-11.6078	-22.0034	-25.2735	-20.8071	-14.6041	-10.8609	-15.1679	-11.5924	-18.2391	-15.9143	-9.32719	-14.5008	-17.111	-18.2564	-13.4032	-10.1342	-14.8048	-14.8579	-19.1592	-18.8946	-12.5085	-12.0635	-13.5118	-11.8736	-14.2116	-14.9615	-17.8654	-11.3807	-16.2244	-17.3257	-18.9737	-13.6292
Zeb2	2	44983632	45117395	-	Zeb2	ENSMUSG00000026872	zinc finger E-box binding homeobox 2 [Source:MGI Symbol;Acc:MGI:1344407]	-	gene	Name match	0	2.47859e-26	1.86502e-24	-7.25437	-10.6461	-7.71976	-5.30559	-12.2264	-17.1653	-22.7883	-16.5047	-21.7695	-18.4983	-19.2859	-10.7028	-14.6227	-23.9834	-14.067	-22.5193	-19.1701	-20.3155	-21.0406	-19.2033	-16.8639	-11.9071	-21.2184	-20.9538	-14.5677	-14.1226	-15.571	-17.5441	-12.2119	-17.0206	-19.9245	-13.5273	-11.9818	-15.4255	-16.0734	-12.3138
Zeb2os	2	45110707	45114087	+	Zeb2os	ENSMUSG00000052248	zinc finger E-box binding homeobox 2, opposite strand [Source:MGI Symbol;Acc:MGI:3652108]	+	gene	Name match	0	2.37637e-05	0.00014807	-2.5985	-15.9698	-20.4916	-14.2057	-13.6422	-22.2304	-22.0265	-17.5601	-16.4634	-13.1922	-17.7168	-14.5849	-14.9922	-18.6774	-13.0004	-17.2132	-13.864	-15.0094	-15.7345	-13.8972	-11.5578	-11.611	-15.9123	-15.6477	-9.26159	-8.81651	-10.2649	-12.2381	-10.9647	-11.7145	-14.6184	-13.3733	-8.12497	-14.0788	-15.7267	-15.6636
Acvr2a	2	48814109	48903269	+	Acvr2a	ENSMUSG00000052155	activin receptor IIA [Source:MGI Symbol;Acc:MGI:102806]	+	gene	Name match	0	0.00021844	0.00119058	-6.33806	-11.7058	-15.8078	-25.708	-18.363	-26.9513	-26.7474	-22.281	-21.1842	-17.9131	-14.0665	-19.3058	-19.7131	-23.3982	-17.7213	-21.9341	-18.5849	-19.7303	-20.4554	-18.6181	-16.2787	-11.8579	-20.6332	-20.3686	-13.9825	-13.5374	-14.9858	-16.9589	-15.6855	-16.4354	-19.3393	-18.0941	-17.6983	-18.7997	-20.4476	-20.3845
Orc4	2	48902824	48950277	-	Orc4	ENSMUSG00000026761	origin recognition complex, subunit 4 [Source:MGI Symbol;Acc:MGI:1347043]	-	gene	Name match	0	1.16174e-14	2.49532e-13	-8.10664	-12.0364	-19.8286	-24.7981	-17.4532	-21.9825	-25.8375	-21.3711	-20.2744	-17.0032	-21.5278	-18.3959	-18.8032	-22.4884	-16.8114	-21.0242	-17.675	-18.8205	-19.5455	-17.7082	-15.3688	-15.422	-19.7233	-19.4587	-13.0726	-12.6275	-14.0759	-16.0491	-14.7757	-15.5255	-11.605	-17.1843	-16.7884	-17.8898	-19.5377	-19.4746
Mbd5	2	48949508	49325405	+	Mbd5	ENSMUSG00000036792	methyl-CpG binding domain protein 5 [Source:MGI Symbol;Acc:MGI:2138934]	+	gene	Name match	0	1.71886e-05	0.000109595	-3.69246	-12.562	-15.8602	-18.1724	-20.4389	-11.3822	-24.8639	-18.8473	-14.8554	-12.9914	-18.4073	-21.3817	-21.7889	-25.4741	-19.7972	-24.0099	-20.6608	-21.8062	-22.5313	-20.694	-18.3546	-18.4077	-22.709	-22.4444	-16.0583	-15.6133	-17.0616	-19.0348	-17.7614	-18.5113	-21.4151	-13.4181	-19.7742	-20.8755	-16.3054	-22.4603
Epc2	2	49451486	49551948	+	Epc2	ENSMUSG00000069495	enhancer of polycomb homolog 2 [Source:MGI Symbol;Acc:MGI:1278321]	+	gene	Name match	0	1.07062e-06	8.03047e-06	-7.37212	-11.6941	-17.0038	-25.8802	-12.4059	-27.1234	-21.5581	-16.3704	-21.3564	-18.0852	-17.2484	-19.478	-19.8852	-23.5704	-17.8935	-22.1063	-18.7571	-19.9025	-20.6276	-18.7903	-16.4509	-16.504	-20.8053	-20.5407	-14.1547	-13.7096	-15.1579	-17.1311	-15.8577	-11.8117	-19.5115	-11.6549	-17.8705	-18.9718	-20.6198	-20.5566
Mmadhc	2	50279881	50296801	-	Mmadhc	ENSMUSG00000026766	methylmalonic aciduria (cobalamin deficiency) cblD type, with homocystinuria [Source:MGI Symbol;Acc:MGI:1923786]	-	gene	Name match	0	0.000223617	0.00121754	-2.29297	-18.2931	-22.8149	-14.92	-15.9654	-24.5537	-24.3498	-19.8834	-18.7866	-15.5155	-20.0401	-16.9082	-17.3155	-21.0006	-15.3237	-19.5365	-16.1873	-17.3327	-18.0578	-16.2205	-13.8811	-13.9343	-18.2356	-17.971	-11.5849	-11.1398	-7.68128	-14.5613	-13.2879	-14.0378	-16.9417	-15.6965	-15.3007	-16.4021	-18.05	-17.9869
Rnd3	2	51130438	51149111	-	Rnd3	ENSMUSG00000017144	Rho family GTPase 3 [Source:MGI Symbol;Acc:MGI:1921444]	-	gene	Name match	0	1.19949e-28	1.1305e-26	-9.50098	-12.7287	-18.2815	-23.4526	-16.1077	-24.6959	-24.492	-20.0256	-18.9289	-15.6577	-20.1823	-17.0504	-17.4577	-21.1429	-15.4659	-19.6787	-16.3295	-17.475	-18.2	-16.3627	-14.0233	-14.0765	-18.3778	-18.1132	-11.7271	-11.282	-12.7304	-14.7036	-13.4302	-14.18	-17.0839	-15.8388	-15.4429	-16.5443	-18.1922	-18.1291
Nmi	2	51948487	51973494	-	Nmi	ENSMUSG00000026946	N-myc (and STAT) interactor [Source:MGI Symbol;Acc:MGI:1928368]	-	gene	Name match	0	0.00941563	0.0390209	-1.78946	-10.3693	-15.0317	-15.8211	-11.519	-25.1172	-24.9134	-20.447	-19.3502	-16.079	-20.6037	-17.4718	-11.3177	-21.5642	-15.8873	-20.1	-10.1895	-17.8963	-12.6114	-16.7841	-14.4447	-14.4978	-18.7991	-18.5345	-12.1485	-11.7034	-13.1517	-15.1249	-13.8515	-14.6014	-12.8938	-16.2601	-15.8643	-12.4213	-14.1396	-18.5504
Tnfaip6	2	52038009	52056686	+	Tnfaip6	ENSMUSG00000053475	tumor necrosis factor alpha induced protein 6 [Source:MGI Symbol;Acc:MGI:1195266]	+	gene	Name match	0	2.00826e-33	2.87053e-31	-10.8864	-11.5287	-22.9574	-23.4529	-16.108	-24.6962	-24.4923	-20.0259	-13.1333	-15.658	-20.1826	-17.0507	-17.458	-16.7432	-15.4662	-19.679	-16.3298	-17.4753	-18.2003	-16.3631	-14.0236	-14.0768	-18.3781	-18.1135	-11.7274	-11.2823	-12.7307	-14.7039	-13.4305	-10.8584	-17.0842	-15.8391	-15.4432	-16.5446	-18.1925	-18.1294
Arl5a	2	52397951	52424901	-	Arl5a	ENSMUSG00000036093	ADP-ribosylation factor-like 5A [Source:MGI Symbol;Acc:MGI:1922673]	-	gene	Name match	0	1.91648e-21	8.81259e-20	-9.35233	-11.0444	-18.8108	-19.3063	-11.9614	-25.2252	-25.0213	-15.4029	-19.4582	-16.187	-15.4721	-17.5797	-11.4951	-21.6722	-15.9952	-20.208	-16.8588	-18.0043	-18.7293	-16.8921	-14.5526	-14.6058	-18.9071	-18.6425	-12.2564	-11.8113	-13.2597	-15.2329	-13.9595	-14.7093	-17.6132	-16.3681	-15.9722	-11.3366	-18.7215	-13.3771
Stam2	2	52691664	52742281	-	Stam2	ENSMUSG00000055371	signal transducing adaptor molecule (SH3 domain and ITAM motif) 2 [Source:MGI Symbol;Acc:MGI:1929100]	-	gene	Name match	0	0.00227284	0.0104042	-5.50295	-12.6134	-15.4989	-21.2798	-13.0724	-26.1345	-25.9306	-15.6975	-13.3451	-17.0963	-21.6209	-18.4891	-18.8963	-22.5815	-16.9045	-21.1173	-14.0312	-14.7616	-19.6387	-17.8014	-15.4619	-11.2756	-19.8164	-19.5518	-13.1657	-12.7206	-14.169	-16.1422	-14.8688	-15.6186	-18.5225	-17.2774	-16.8815	-17.9829	-19.6308	-19.5677
Fmnl2	2	52857860	53133804	+	Fmnl2	ENSMUSG00000036053	formin-like 2 [Source:MGI Symbol;Acc:MGI:1918659]	+	gene	Name match	0	5.88671e-05	0.00034751	-3.90567	-12.4803	-17.0004	-7.52788	-13.256	-19.8108	-21.4309	-19.3666	-22.8141	-14.8674	-16.1342	-15.6962	-14.2023	-18.8317	-12.1768	-18.2827	-13.3213	-16.6847	-22.0853	-15.5725	-11.7122	-17.9618	-22.2631	-21.9985	-15.6124	-15.1673	-16.6157	-13.7364	-8.92504	-18.0653	-13.9468	-19.724	-11.518	-12.7937	-15.0428	-13.5677
Prpf40a	2	53134704	53191284	-	Prpf40a	ENSMUSG00000061136	pre-mRNA processing factor 40A [Source:MGI Symbol;Acc:MGI:1860512]	-	gene	Name match	0	1.27814e-13	2.40053e-12	-4.16698	-10.2014	-24.5564	-16.6807	-13.4675	-8.93692	-22.7694	-21.6249	-20.5282	-17.257	-21.7816	-18.6497	-13.7757	-22.7421	-11.959	-21.278	-17.9288	-19.0742	-19.7993	-13.1096	-15.6226	-11.0002	-19.9771	-19.7125	-13.3264	-12.8813	-14.3297	-16.3028	-15.0295	-15.7793	-18.6832	-17.438	-17.0422	-18.1436	-19.7915	-19.7284
Nr4a2	2	57106830	57124003	-	Nr4a2	ENSMUSG00000026826	nuclear receptor subfamily 4, group A, member 2 [Source:MGI Symbol;Acc:MGI:1352456]	-	gene	Name match	0	0.000956067	0.00467345	-6.07454	-10.8227	-14.3179	-23.3318	-10.4773	-24.5751	-24.3712	-15.6653	-18.8081	-15.5369	-20.0615	-16.9296	-17.3369	-21.0221	-15.3451	-19.5579	-16.2087	-17.3542	-18.0792	-16.2419	-13.9025	-13.9557	-18.257	-13.6704	-11.6063	-11.1612	-12.6096	-10.1088	-13.3094	-14.0592	-16.9631	-15.718	-15.3221	-16.4235	-18.0714	-18.0083
Pkp4	2	59160850	59355208	+	Pkp4	ENSMUSG00000026991	plakophilin 4 [Source:MGI Symbol;Acc:MGI:109281]	+	gene	Name match	0	1.66532e-05	0.000106448	-2.88658	-12.0742	-15.3968	-16.6386	-12.6771	-10.1047	-27.8716	-23.4052	-22.3085	-14.7154	-19.24	-20.4301	-20.8373	-24.5225	-18.8455	-23.0583	-13.6502	-20.8546	-14.9682	-15.198	-12.5505	-17.4561	-21.7574	-21.4928	-15.1067	-8.627	-16.11	-18.0832	-16.8098	-13.4076	-20.4635	-19.2184	-15.0856	-15.3125	-21.5718	-21.5087
Tanc1	2	59612042	59846149	+	Tanc1	ENSMUSG00000035168	tetratricopeptide repeat, ankyrin repeat and coiled-coil containing 1 [Source:MGI Symbol;Acc:MGI:1914110]	+	gene	Name match	0	0.0018522	0.0085936	-2.21471	-11.674	-16.7562	-11.6099	-12.9313	-18.4811	-28.1401	-16.8778	-17.518	-19.3058	-17.1238	-12.2111	-16.1989	-19.5515	-14.7921	-16.4743	-19.9776	-12.5787	-14.2449	-15.0008	-12.6614	-17.7246	-15.8294	-17.6092	-15.3752	-14.9301	-16.3785	-11.0297	-17.0782	-17.8281	-20.732	-13.4522	-12.7691	-20.1924	-21.8403	-14.8703
Wdsub1	2	59852364	59882591	-	Wdsub1	ENSMUSG00000026988	WD repeat, SAM and U-box domain containing 1 [Source:MGI Symbol;Acc:MGI:1919387]	-	gene	Name match	0	1.81316e-08	1.7427e-07	-8.01242	-11.3128	-18.6926	-24.1475	-16.8025	-21.9168	-25.1869	-20.7205	-19.6237	-16.3525	-20.8772	-17.7453	-18.1525	-21.8377	-16.1608	-20.3735	-17.0244	-18.1698	-18.8949	-17.0576	-14.7182	-14.7713	-19.0726	-18.808	-12.4219	-11.9769	-13.4252	-15.3984	-14.125	-14.8749	-17.7788	-12.3816	-16.1378	-17.2391	-18.8871	-18.8239
Baz2b	2	59899363	60209839	-	Baz2b	ENSMUSG00000026987	bromodomain adjacent to zinc finger domain, 2B [Source:MGI Symbol;Acc:MGI:2442782]	-	gene	Name match	0	2.24662e-15	5.31293e-14	-5.4066	-11.2407	-15.5756	-17.2939	-12.4186	-21.3898	-23.4412	-18.0221	-17.406	-12.4843	-19.1788	-21.1058	-13.9348	-20.2914	-12.5749	-23.7341	-15.2787	-21.5303	-22.2554	-15.7426	-18.0787	-18.1319	-22.4332	-22.1686	-15.7825	-15.3374	-10.5463	-12.0524	-17.4855	-18.2354	-14.9212	-13.1572	-19.4983	-20.5997	-22.2476	-22.1845
Gm13620	2	60125096	60125819	+	Gm13620	ENSMUSG00000086603	predicted gene 13620 [Source:MGI Symbol;Acc:MGI:3650077]	+	gene	Name match	0	0.0048765	0.0211787	-3.14321	-13.7464	-18.2682	-18.7637	-11.4188	-20.007	-19.8031	-15.3367	-14.24	-10.9688	-15.4934	-12.3615	-12.7688	-16.454	-10.777	-14.9898	-11.6406	-12.7861	-13.5111	-11.6738	-9.33442	-9.38759	-13.6889	-13.4243	-7.0382	-6.59312	-8.04149	-10.0147	-8.74127	-9.49113	-12.395	-11.1499	-10.754	-11.8554	-13.5033	-13.4402
2007-03-01	2	60209887	60250676	+	2007-03-01	ENSMUSG00000026977	membrane-associated ring finger (C3HC4) 7 [Source:MGI Symbol;Acc:MGI:1931053]	+	gene	Name match	0	7.99203e-05	0.000461236	-2.55784	-12.8559	-7.00293	-16.1894	-17.2348	-25.8231	-25.6192	-21.1528	-20.056	-16.7849	-21.3095	-18.1776	-13.6255	-22.27	-16.5931	-20.8059	-17.4567	-14.4501	-19.3272	-17.4899	-15.1505	-15.2037	-19.505	-19.2404	-12.8543	-12.4092	-13.8576	-15.8307	-10.0834	-15.3072	-18.2111	-16.9659	-16.5701	-17.6715	-19.3194	-19.2563
Cd302	2	60251993	60284488	-	Cd302	ENSMUSG00000060703	CD302 antigen [Source:MGI Symbol;Acc:MGI:1913455]	-	gene	Name match	0	0	0	-9.71052	-12.6231	-12.3177	-24.2518	-10.9735	-25.4951	-25.2912	-20.8248	-19.7281	-16.4569	-20.9815	-11.0538	-18.2569	-21.9421	-16.2652	-20.4779	-17.1288	-18.2742	-18.9993	-17.162	-14.8226	-14.8757	-19.177	-18.9124	-12.5263	-12.0813	-13.5296	-15.5028	-14.2294	-11.2423	-17.8831	-16.638	-16.2422	-17.3435	-18.9914	-18.9283
Pla2r1	2	60417543	60553308	-	Pla2r1	ENSMUSG00000054580	phospholipase A2 receptor 1 [Source:MGI Symbol;Acc:MGI:102468]	-	gene	Name match	0	9.62747e-09	9.59539e-08	-7.74514	-11.8762	-13.6295	-18.2617	-11.8752	-27.5579	-27.354	-18.4137	-21.7909	-18.5197	-17.6069	-19.9125	-13.8458	-24.0049	-18.3279	-22.5407	-19.1915	-20.337	-16.3251	-19.2248	-12.7333	-12.9791	-21.2398	-20.9752	-14.5891	-14.144	-15.5924	-17.5656	-16.2922	-17.042	-19.9459	-18.7008	-18.3049	-19.4063	-21.0542	-20.9911
Rbms1	2	60750193	60963192	-	Rbms1	ENSMUSG00000026970	RNA binding motif, single stranded interacting protein 1 [Source:MGI Symbol;Acc:MGI:1861774]	-	gene	Name match	0	1.58092e-09	1.75012e-08	-3.68888	-11.8293	-17.0808	-15.4368	-10.9796	-18.8413	-18.2352	-17.5027	-17.2012	-11.6511	-16.2201	-12.3174	-15.0625	-17.2642	-11.0443	-18.7165	-13.4798	-15.5128	-21.7118	-19.8745	-9.25895	-17.5882	-16.5281	-21.6249	-15.2388	-14.7938	-16.2421	-18.2153	-16.9419	-10.1304	-14.6623	-11.7147	-13.5173	-14.6946	-16.1944	-16.2794
Tank	2	61578585	61654171	+	Tank	ENSMUSG00000064289	TRAF family member-associated Nf-kappa B activator [Source:MGI Symbol;Acc:MGI:107676]	+	gene	Name match	0	5.35958e-07	4.18961e-06	-7.60465	-10.7516	-24.9742	-18.4597	-12.8853	-26.713	-26.5091	-22.0427	-14.209	-17.6748	-22.1994	-19.0675	-13.3455	-23.16	-17.483	-21.6958	-18.3466	-19.4921	-20.2171	-18.3799	-16.0404	-16.0936	-20.3949	-20.1303	-13.7442	-13.2991	-14.7475	-16.7207	-15.4473	-16.1971	-14.0421	-17.8559	-17.46	-18.5614	-20.2093	-20.1462
Psmd14	2	61711694	61800376	+	Psmd14	ENSMUSG00000026914	proteasome (prosome, macropain) 26S subunit, non-ATPase, 14 [Source:MGI Symbol;Acc:MGI:1913284]	+	gene	Name match	0	2.00371e-12	3.28334e-11	-4.26443	-11.7595	-16.1458	-25.7002	-12.4484	-26.9435	-26.7396	-22.2732	-21.1765	-17.9053	-22.4299	-19.2981	-19.7053	-23.3905	-17.7136	-21.9263	-18.5771	-19.7226	-20.4477	-18.6104	-16.2709	-16.3241	-20.6254	-20.3608	-13.9747	-13.5296	-14.978	-16.9512	-15.6778	-16.4277	-19.3315	-13.1795	-17.6906	-18.7919	-20.4398	-20.3767
Dpp4	2	62330073	62412231	-	Dpp4	ENSMUSG00000035000	dipeptidylpeptidase 4 [Source:MGI Symbol;Acc:MGI:94919]	-	gene	Name match	0	1.01518e-07	8.87963e-07	-7.35178	-13.0284	-15.3821	-21.7375	-12.7007	-26.8333	-26.6294	-22.163	-14.7244	-17.7951	-22.3197	-14.3354	-19.5951	-23.2802	-17.6033	-21.8161	-18.4669	-19.6123	-20.3374	-18.5001	-16.1607	-16.2139	-14.7484	-20.2506	-13.8645	-13.4194	-14.8678	-16.8409	-15.5676	-16.3174	-19.2213	-17.9761	-17.5803	-18.6817	-17.0077	-15.8665
Fap	2	62500943	62574075	-	Fap	ENSMUSG00000000392	fibroblast activation protein [Source:MGI Symbol;Acc:MGI:109608]	-	gene	Name match	0	0.00488858	0.0212286	-4.46481	-10.8931	-16.5362	-18.7002	-11.3252	-26.6654	-22.3095	-18.0357	-20.8984	-12.7747	-22.1518	-19.0199	-19.4272	-23.1124	-17.4354	-21.6482	-18.299	-19.4444	-20.1695	-18.3322	-15.9928	-16.046	-20.3473	-20.0827	-13.6966	-13.2515	-14.6999	-16.673	-15.3997	-16.1495	-19.0534	-17.8083	-17.4124	-18.5138	-20.1617	-20.0986
Ifih1	2	62595798	62646255	-	Ifih1	ENSMUSG00000026896	interferon induced with helicase C domain 1 [Source:MGI Symbol;Acc:MGI:1918836]	-	gene	Name match	0	8.78028e-06	5.86192e-05	-5.91463	-11.5177	-24.3911	-24.8867	-17.5417	-26.1299	-25.9261	-21.4597	-20.3629	-12.9397	-21.6164	-18.4845	-18.8917	-17.6176	-16.9	-21.1127	-17.7636	-18.909	-19.6341	-17.7968	-15.4574	-15.5105	-19.8118	-19.5472	-13.1611	-12.7161	-14.1644	-16.1376	-14.8642	-15.6141	-18.518	-17.2728	-16.877	-17.9783	-15.7738	-15.5042
Ttc21b	2	66184327	66256617	-	Ttc21b	ENSMUSG00000034848	tetratricopeptide repeat domain 21B [Source:MGI Symbol;Acc:MGI:1920918]	-	gene	Name match	0	0.00406242	0.0178677	-4.92102	-10.9097	-16.5242	-25.4054	-18.0605	-26.6487	-26.4448	-21.9784	-20.8817	-17.6105	-16.4285	-19.0032	-13.7039	-23.0956	-17.4187	-14.0037	-18.2823	-19.4277	-20.1528	-12.9936	-15.9761	-11.3537	-20.3306	-15.329	-13.6799	-13.2348	-14.6832	-16.6563	-9.90902	-16.1328	-19.0367	-17.7915	-17.3957	-18.4971	-20.145	-13.7204
Scn7a	2	66673425	66784914	-	Scn7a	ENSMUSG00000034810	sodium channel, voltage-gated, type VII, alpha [Source:MGI Symbol;Acc:MGI:102965]	-	gene	Name match	0	0	0	-12.1586	-13.5302	-16.1445	-19.1235	-13.6755	-27.2737	-27.0698	-22.6034	-21.5067	-18.2355	-18.5206	-19.6282	-20.0355	-23.7207	-18.0437	-22.2565	-18.9073	-20.0528	-16.3039	-18.9406	-11.5911	-16.6543	-20.9556	-20.691	-14.3049	-13.8598	-15.3082	-17.2814	-16.008	-16.7578	-19.6617	-18.4166	-18.0207	-19.1221	-20.77	-20.7069
Xirp2	2	67446002	67526614	+	Xirp2	ENSMUSG00000027022	xin actin-binding repeat containing 2 [Source:MGI Symbol;Acc:MGI:2685198]	+	gene	Name match	0	0.00115424	0.00556796	7.1292	-11.1573	-10.1999	-16.5218	-18.2176	-6.08951	-26.602	-22.1356	-21.0388	-17.7677	-22.2923	-19.1604	-19.5677	-23.2528	-13.4239	-21.7887	-18.4395	-14.185	-20.31	-10.9898	-16.1333	-16.1865	-20.4878	-20.2232	-13.8371	-13.392	-9.6009	-16.8135	-15.5401	-16.29	-19.1939	-11.5488	-17.5529	-10.2783	-20.3022	-20.2391
B3galt1	2	67565871	68122689	+	B3galt1	ENSMUSG00000034780	UDP-Gal:betaGlcNAc beta 1,3- galactosyltransferase, polypeptide 1 [Source:MGI Symbol;Acc:MGI:1349403]	+	gene	Name match	0	1.3422e-10	1.72768e-09	-9.53384	-12.1991	-16.7858	-16.0925	-14.2688	-21.6938	-22.8983	-20.6842	-16.5875	-15.6489	-16.6292	-17.1527	-22.3558	-26.041	-15.9641	-24.5768	-15.2176	-22.3731	-23.0981	-21.2609	-18.9214	-13.5007	-23.2759	-23.0113	-16.6252	-16.1801	-17.6285	-13.3622	-18.3283	-19.0781	-15.6206	-20.7369	-20.341	-12.4734	-23.0903	-18.4829
Stk39	2	68210445	68472268	-	Stk39	ENSMUSG00000027030	serine/threonine kinase 39 [Source:MGI Symbol;Acc:MGI:1858416]	-	gene	Name match	0	7.27011e-09	7.38443e-08	-7.11117	-11.5182	-12.2305	-10.3814	-14.3057	-28.5054	-24.6901	-16.5435	-22.7384	-12.4083	-10.9933	-14.6635	-16.3603	-19.7129	-13.2408	-23.4882	-20.139	-21.2845	-16.334	-20.1722	-17.8328	-12.0061	-22.1873	-17.0158	-15.5366	-15.0915	-16.5399	-13.1516	-12.3328	-17.9895	-20.8934	-15.0368	-12.067	-13.1794	-14.5923	-21.9386
Cers6	2	68861441	69114282	+	Cers6	ENSMUSG00000027035	ceramide synthase 6 [Source:MGI Symbol;Acc:MGI:2442564]	+	gene	Name match	0	0.0122502	0.0498396	-1.90342	-12.4076	-14.1104	-11.8298	-14.9599	-22.3488	-28.2511	-23.7847	-22.688	-19.4168	-19.4675	-20.8096	-16.4799	-20.6625	-13.2657	-23.4378	-11.8022	-21.2341	-21.9592	-20.1219	-11.8231	-17.8356	-17.3999	-14.4535	-15.4862	-15.0412	-12.2501	-18.4627	-17.1893	-17.9392	-20.843	-19.5979	-12.4062	-15.1514	-17.3399	-21.8882
Gm37747	2	68989381	68993383	+	Gm37747	ENSMUSG00000104262	predicted gene, 37747 [Source:MGI Symbol;Acc:MGI:5610975]	+	gene	Name match	0	0.000307125	0.00163172	-5.69432	-16.2134	-20.7352	-21.2307	-13.8858	-22.474	-22.2701	-17.8037	-16.707	-13.4358	-17.9604	-14.8286	-15.2358	-18.921	-13.244	-17.4568	-14.1076	-15.2531	-15.9782	-14.1409	-11.8014	-11.8546	-16.1559	-15.8913	-9.50522	-9.06014	-10.5085	-12.4817	-11.2083	-11.9582	-14.862	-13.6169	-13.221	-14.3224	-15.9703	-15.9072
Lrp2	2	69424340	69586065	-	Lrp2	ENSMUSG00000027070	low density lipoprotein receptor-related protein 2 [Source:MGI Symbol;Acc:MGI:95794]	-	gene	Name match	0	0.00127432	0.00608699	6.99784	-11.2582	-6.04458	-14.6077	-10.9826	-27.8103	-27.6065	-16.1552	-18.1909	-12.7375	-15.214	-13.8631	-11.8165	-17.9155	-13.2991	-16.0562	-13.0825	-14.2476	-14.2556	-19.4772	-9.2443	-17.1909	-14.52	-21.2276	-14.8415	-14.3965	-10.6054	-11.5575	-9.02629	-10.1312	-13.9803	-11.4089	-10.6372	-11.446	-12.8785	-13.412
Bbs5	2	69647171	69667571	+	Bbs5	ENSMUSG00000063145	Bardet-Biedl syndrome 5 (human) [Source:MGI Symbol;Acc:MGI:1919819]	+	gene	Name match	0	0.000158506	0.000879682	-2.66185	-12.2015	-15.9785	-23.5802	-11.5597	-24.8235	-24.6196	-20.1532	-19.0565	-15.7853	-20.3099	-17.178	-17.5853	-21.2705	-10.918	-19.8063	-12.7202	-17.6026	-18.3276	-16.4904	-14.1509	-14.2041	-18.5054	-18.2408	-11.8547	-11.4096	-12.858	-14.8312	-13.5578	-14.3076	-17.2115	-15.9664	-15.5705	-16.6719	-18.3198	-18.2567
Fastkd1	2	69686815	69713516	-	Fastkd1	ENSMUSG00000027086	FAST kinase domains 1 [Source:MGI Symbol;Acc:MGI:2444596]	-	gene	Name match	0	1.83676e-05	0.000116461	-7.19623	-11.0311	-14.0636	-18.1441	-9.10526	-25.2118	-25.0079	-20.5415	-19.4448	-16.1736	-20.6982	-12.9549	-17.9736	-18.3368	-10.7424	-20.1946	-11.3359	-13.2539	-18.716	-16.8787	-14.5392	-8.01413	-13.4198	-18.6291	-12.243	-11.7979	-13.2463	-15.2195	-13.9461	-14.6959	-17.5998	-16.3547	-10.2833	-17.0602	-18.7081	-18.645
Ppig	2	69722545	69754012	+	Ppig	ENSMUSG00000042133	peptidyl-prolyl isomerase G (cyclophilin G) [Source:MGI Symbol;Acc:MGI:2445173]	+	gene	Name match	0	1.03262e-10	1.34475e-09	-3.85718	-10.9973	-15.8506	-15.4205	-11.6211	-25.4487	-25.2449	-20.7785	-11.795	-11.735	-15.5737	-17.8033	-18.2105	-21.8957	-11.2594	-20.4315	-17.0824	-18.2278	-18.9529	-17.1156	-14.7762	-14.8293	-19.1306	-18.866	-12.4799	-12.0349	-13.4832	-15.4564	-14.183	-14.9329	-17.8368	-16.5916	-16.1958	-17.2971	-18.9451	-15.0295
Phospho2	2	69789623	69800005	+	Phospho2	ENSMUSG00000027088	phosphatase, orphan 2 [Source:MGI Symbol;Acc:MGI:1920623]	+	gene	Name match	0	2.11959e-13	3.87062e-12	-8.31345	-11.0967	-16.1003	-14.0275	-8.55427	-16.0388	-23.6452	-13.7789	-18.0821	-14.8109	-14.8616	-16.2036	-13.1369	-16.3367	-9.18171	-15.51	-10.9384	-16.6281	-13.8793	-15.5159	-13.1765	-13.2297	-17.531	-17.2664	-10.8803	-10.4352	-11.8836	-13.8568	-8.03904	-13.3332	-16.2371	-14.992	-11.1222	-10.5455	-17.3454	-13.8083
Ssb	2	69861562	69871846	+	Ssb	ENSMUSG00000068882	Sjogren syndrome antigen B [Source:MGI Symbol;Acc:MGI:98423]	+	gene	Name match	0	2.7866e-18	9.46353e-17	-4.75947	-10.6415	-16.8571	-22.5921	-10.3947	-23.8354	-23.6315	-19.1651	-18.0684	-14.7972	-19.3218	-12.453	-16.5972	-20.2824	-14.6054	-18.8182	-15.469	-16.6145	-17.3395	-15.5023	-13.1628	-13.216	-17.5173	-17.2527	-10.8666	-10.4215	-11.8699	-13.8431	-12.5697	-13.3195	-16.2234	-14.9783	-14.5824	-15.6838	-17.3317	-17.2686
Mettl5	2	69871198	69885615	-	Mettl5	ENSMUSG00000051730	methyltransferase like 5 [Source:MGI Symbol;Acc:MGI:1922672]	-	gene	Name match	0	1.76367e-11	2.55062e-10	-6.62351	-10.9102	-22.5839	-18.0205	-10.7751	-24.3227	-24.1188	-19.6524	-18.5557	-9.8106	-14.3717	-16.6773	-10.7427	-15.1258	-15.0928	-12.5388	-15.9564	-17.1018	-17.8269	-15.9896	-8.25023	-13.7033	-18.0046	-17.74	-11.3539	-10.9089	-12.3572	-14.3304	-13.057	-13.8069	-16.7107	-15.4656	-15.0698	-16.1711	-10.7363	-17.7559
Gm13625	2	69871412	69872202	-	Gm13625	ENSMUSG00000089902	predicted gene 13625 [Source:MGI Symbol;Acc:MGI:3709621]	-	gene	Name match	0	1.22691e-08	1.20494e-07	-3.0859	-13.8741	-18.3959	-18.8914	-11.5465	-20.1347	-19.9308	-15.4644	-14.3677	-11.0965	-15.6211	-12.4892	-12.8965	-16.5816	-10.9047	-15.1175	-11.7683	-12.9137	-13.6388	-11.8015	-9.46211	-9.51527	-13.8166	-13.552	-7.16588	-6.72081	-8.16918	-10.1423	-8.86896	-9.61882	-12.5227	-11.2776	-10.8817	-11.9831	-13.631	-13.5679
Ubr3	2	69897246	70024013	+	Ubr3	ENSMUSG00000044308	ubiquitin protein ligase E3 component n- recognin 3 [Source:MGI Symbol;Acc:MGI:1861100]	+	gene	Name match	0	6.29914e-08	5.66429e-07	-6.77566	-12.6286	-20.1419	-15.0518	-18.8708	-27.459	-23.1962	-17.7787	-21.692	-18.4208	-16.1935	-19.8135	-20.2208	-23.9059	-18.229	-22.4418	-19.0926	-14.7641	-20.9631	-19.1258	-16.7864	-16.8396	-15.5294	-20.8763	-14.4902	-14.0451	-15.4935	-12.7911	-16.1933	-16.9431	-19.847	-18.6018	-18.206	-19.3074	-14.8033	-20.8922
Gm26558	2	70661149	70662109	-	Gm26558	ENSMUSG00000097025	predicted gene, 26558 [Source:MGI Symbol;Acc:MGI:5477052]	-	gene	Name match	0	0.000489758	0.00252111	-3.28567	-14.155	-14.9398	-19.1722	-7.03146	-20.4155	-20.2117	-15.7452	-14.6485	-11.3773	-15.9019	-12.7701	-13.1773	-16.8625	-11.1856	-15.3983	-12.0492	-13.1946	-13.9197	-12.0824	-9.74297	-9.79613	-14.0974	-7.89946	-7.44674	-7.00167	-8.45004	-10.4232	-9.14982	-9.89968	-12.8036	-11.5584	-11.1626	-12.2639	-13.9119	-13.8487
Gorasp2	2	70661576	70712636	+	Gorasp2	ENSMUSG00000014959	golgi reassembly stacking protein 2 [Source:MGI Symbol;Acc:MGI:2135962]	+	gene	Name match	0	5.24071e-05	0.00031113	-2.28863	-11.4445	-20.7968	-19.1079	-12.763	-26.1471	-19.2993	-15.8012	-20.3801	-10.5818	-16.0221	-18.5016	-13.265	-17.9826	-13.3057	-17.5184	-11.479	-14.1303	-14.1069	-12.9615	-15.4745	-10.9162	-16.092	-13.631	-13.1783	-12.7332	-6.53772	-16.1548	-10.4074	-11.4792	-18.5351	-10.6785	-11.8841	-11.8893	-15.032	-14.3408
Tlk1	2	70712407	70825728	-	Tlk1	ENSMUSG00000041997	tousled-like kinase 1 [Source:MGI Symbol;Acc:MGI:2441683]	-	gene	Name match	0	1.46196e-15	3.56144e-14	-7.08894	-9.56554	-13.9155	-15.6445	-6.85698	-16.363	-14.8894	-9.52838	-13.6166	-6.38933	-10.3995	-8.17952	-6.85631	-11.4288	-6.4249	-10.3849	-7.39622	-8.96645	-9.35417	-7.75002	-5.94517	-5.24156	-9.26152	-20.7145	-14.3284	-13.8833	-5.37075	-6.46726	-5.15497	-6.1689	-7.82113	-5.87631	-5.64462	-6.08334	-8.73201	-9.0519
Dcaf17	2	71055328	71099142	+	Dcaf17	ENSMUSG00000041966	DDB1 and CUL4 associated factor 17 [Source:MGI Symbol;Acc:MGI:1923013]	+	gene	Name match	0	1.14004e-06	8.52957e-06	-6.98328	-12.5948	-18.2281	-17.5537	-10.9381	-22.1893	-17.3225	-13.4529	-20.1593	-16.8881	-21.4127	-18.2808	-13.3662	-22.3733	-10.763	-11.6723	-17.5599	-18.7054	-19.4304	-11.4869	-10.7094	-15.3069	-15.4562	-19.3436	-12.9575	-12.5124	-13.9608	-15.934	-11.3386	-15.4104	-18.3143	-12.7472	-11.7664	-14.1632	-15.5702	-19.3595
Dync1i2	2	71211706	71263303	+	Dync1i2	ENSMUSG00000027012	dynein cytoplasmic 1 intermediate chain 2 [Source:MGI Symbol;Acc:MGI:107750]	+	gene	Name match	0	2.07731e-17	6.34077e-16	-5.65523	-11.0354	-24.4234	-21.3074	-12.7215	-26.1622	-20.0514	-15.0361	-20.3951	-17.124	-15.7417	-14.7798	-18.924	-13.7326	-16.9322	-14.6007	-17.7958	-18.9412	-14.8139	-17.829	-15.4896	-15.5428	-19.8441	-19.5795	-13.1934	-12.7483	-14.1967	-16.1698	-14.8965	-15.6463	-18.5502	-17.305	-16.9092	-18.0106	-19.6585	-13.6105
Slc25a12	2	71271063	71367749	-	Slc25a12	ENSMUSG00000027010	solute carrier family 25 (mitochondrial carrier, Aralar), member 12 [Source:MGI Symbol;Acc:MGI:1926080]	-	gene	Name match	0	1.98375e-16	5.36502e-15	-8.61049	-11.7367	-15.7323	-18.1415	-14.08	-27.0682	-22.3904	-16.7865	-21.3012	-18.03	-17.8176	-14.2263	-19.83	-12.9957	-17.8382	-22.051	-18.7018	-15.3733	-20.5723	-18.735	-9.61425	-16.4488	-16.5106	-20.4855	-14.0994	-13.6543	-15.1027	-17.0758	-15.8025	-16.5523	-19.4562	-13.5996	-13.8559	-14.3051	-16.6051	-15.7644
Hat1	2	71388958	71441622	+	Hat1	ENSMUSG00000027018	histone aminotransferase 1 [Source:MGI Symbol;Acc:MGI:96013]	+	gene	Name match	0	0.000752575	0.00375568	-3.90861	-11.9526	-24.4529	-19.511	-11.751	-26.1917	-25.9878	-15.0475	-15.4147	-17.1535	-17.4386	-11.339	-18.9535	-14.2483	-16.9617	-21.1745	-11.544	-18.9708	-14.7365	-12.8992	-15.5191	-15.5723	-19.8736	-19.609	-13.2229	-12.7778	-14.2262	-11.6551	-14.926	-15.6758	-18.5797	-17.3346	-12.7867	-13.8006	-14.7287	-19.6249
Pdk1	2	71873224	71903858	+	Pdk1	ENSMUSG00000006494	pyruvate dehydrogenase kinase, isoenzyme 1 [Source:MGI Symbol;Acc:MGI:1926119]	+	gene	Name match	0	0.0120383	0.0490281	5.62349	-11.0088	-16.3098	-15.7763	-9.95557	-6.68144	-20.4103	-20.7398	-19.643	-16.3718	-20.8965	-17.7646	-18.1718	-21.857	-16.1801	-15.4335	-17.0437	-18.1891	-18.9142	-17.0769	-14.7375	-14.7906	-19.0919	-18.8273	-12.4412	-11.9962	-13.4445	-15.4177	-14.1443	-14.8942	-17.7981	-11.5936	-16.1571	-17.2584	-10.9089	-18.8432
Map3k20	2	72285637	72442610	+	Map3k20	ENSMUSG00000004085	mitogen-activated protein kinase kinase kinase 20 [Source:MGI Symbol;Acc:MGI:2443258]	+	gene	Name match	0	1.12335e-21	5.26759e-20	-6.92122	-11.4374	-12.3507	-12.9699	-11.6872	-13.6041	-21.0716	-16.9677	-22.0003	-14.6702	-18.3468	-20.1219	-20.5291	-20.2549	-10.4665	-16.1552	-19.4009	-16.0724	-21.2715	-19.4342	-13.2423	-17.1479	-17.4898	-21.1846	-14.7985	-14.3534	-15.8018	-17.775	-11.5947	-17.2515	-15.4798	-18.9102	-12.97	-19.6157	-21.2636	-16.961
Sp3	2	72936427	72980446	-	Sp3	ENSMUSG00000027109	trans-acting transcription factor 3 [Source:MGI Symbol;Acc:MGI:1277166]	-	gene	Name match	0	4.65183e-18	1.53584e-16	-5.67827	-11.3963	-15.799	-16.9453	-10.8529	-11.4393	-25.7291	-21.2627	-20.166	-10.173	-17.808	-18.2876	-14.8424	-22.38	-11.6931	-20.9158	-17.5667	-18.7121	-14.8257	-17.5999	-15.2604	-15.3136	-19.6149	-19.3503	-12.9642	-12.5191	-8.4232	-15.9407	-14.6673	-11.6802	-18.321	-13.017	-16.6801	-13.1058	-19.4293	-19.3662
Ola1	2	73092801	73218924	-	Ola1	ENSMUSG00000027108	Obg-like ATPase 1 [Source:MGI Symbol;Acc:MGI:1914309]	-	gene	Name match	0	1.41827e-10	1.81835e-09	-4.33747	-11.388	-16.429	-20.7709	-13.7114	-12.0018	-21.3144	-16.848	-18.0732	-18.4134	-16.2942	-14.0996	-20.2134	-19.0462	-12.8217	-22.4344	-14.4738	-20.2307	-20.9558	-19.1185	-16.7791	-16.8322	-21.1335	-20.8689	-14.4828	-14.0378	-15.4861	-17.4593	-16.1859	-16.9358	-19.8396	-18.5945	-18.1987	-13.9001	-20.9479	-15.3405
Cir1	2	73283105	73312701	-	Cir1	ENSMUSG00000041777	corepressor interacting with RBPJ, 1 [Source:MGI Symbol;Acc:MGI:1914185]	-	gene	Name match	0	1.87721e-10	2.36084e-09	-5.12283	-10.9705	-23.6215	-24.117	-16.7721	-11.7742	-25.1564	-20.69	-19.5933	-16.3221	-20.8467	-17.7149	-18.1221	-21.8073	-16.1303	-20.3431	-16.9939	-18.1394	-18.8645	-17.0272	-14.6877	-14.7409	-19.0422	-18.7776	-12.3915	-11.9464	-13.3948	-15.368	-14.0946	-14.8444	-17.7483	-16.5032	-16.1073	-17.2087	-18.8566	-18.7935
Wipf1	2	73429610	73529734	-	Wipf1	ENSMUSG00000075284	WAS/WASL interacting protein family, member 1 [Source:MGI Symbol;Acc:MGI:2178801]	-	gene	Name match	0	1.09337e-14	2.34988e-13	-9.18919	-12.3706	-16.3886	-16.5685	-12.6504	-22.9666	-26.9147	-22.4483	-21.3516	-18.0804	-22.605	-13.1313	-14.7742	-18.3692	-11.7366	-16.5918	-18.7522	-19.8977	-12.6252	-12.0943	-16.446	-16.4992	-13.907	-20.5359	-14.1498	-13.7047	-15.1531	-17.1263	-9.63477	-16.6027	-19.5066	-12.1095	-17.8656	-11.5389	-20.6149	-13.2001
Chn1os3	2	73596526	73616012	+	Chn1os3	ENSMUSG00000086544	chimerin 1, opposite strand 3 [Source:MGI Symbol;Acc:MGI:3705094]	+	gene	Name match	0	0.000720127	0.0036053	-5.65269	-11.2573	-23.0186	-16.8702	-16.1691	-21.1459	-20.8165	-14.0282	-18.9903	-15.7192	-20.2438	-17.1119	-17.5192	-21.2043	-15.5274	-19.7402	-16.391	-17.5364	-18.2615	-16.4242	-14.0848	-14.138	-18.4393	-18.1747	-11.7886	-11.3435	-12.7919	-14.765	-13.4916	-14.2415	-17.1454	-15.9002	-15.5044	-16.6058	-18.2537	-18.1906
Chn1	2	73610660	73775346	-	Chn1	ENSMUSG00000056486	chimerin 1 [Source:MGI Symbol;Acc:MGI:1915674]	-	gene	Name match	0	2.87382e-07	2.35565e-06	-5.90342	-12.5322	-17.4104	-14.1372	-11.7126	-19.7187	-20.1587	-23.1662	-18.217	-18.7983	-23.3229	-20.1911	-16.7459	-20.3241	-13.5966	-22.8193	-15.7332	-15.5567	-21.3407	-19.5034	-12.9245	-17.2171	-21.5184	-21.2538	-14.8677	-14.4226	-15.871	-17.8442	-16.5708	-17.3207	-20.2245	-18.9794	-18.5835	-14.889	-14.952	-21.2697
Atf2	2	73816509	73892639	-	Atf2	ENSMUSG00000027104	activating transcription factor 2 [Source:MGI Symbol;Acc:MGI:109349]	-	gene	Name match	0	3.34172e-11	4.67512e-10	-8.91004	-10.4606	-24.9845	-20.1581	-10.2689	-15.8752	-18.4426	-17.8136	-15.5949	-17.6851	-15.3995	-12.356	-13.4752	-17.5265	-9.65487	-15.0623	-12.5903	-19.5024	-14.7536	-18.3902	-10.6134	-16.1039	-20.4052	-13.0113	-13.7545	-13.3095	-10.7985	-16.731	-15.4576	-16.2075	-19.1114	-17.8662	-12.0704	-18.5717	-13.4677	-13.4967
Atp5g3	2	73908447	73911326	-	Atp5g3	ENSMUSG00000018770	ATP synthase, H+ transporting, mitochondrial F0 complex, subunit C3 (subunit 9) [Source:MGI Symbol;Acc:MGI:2442035]	-	gene	Name match	0	1.46612e-05	9.4788e-05	-2.8558	-9.80507	-20.2602	-20.7557	-13.4108	-3.47039	-2.51772	-17.3287	-16.232	-12.9608	-17.4854	-7.16812	-14.7608	-18.446	-12.769	-16.9818	-13.6326	-14.7781	-15.5031	-13.6659	-11.3264	-11.3796	-15.6809	-15.4163	-9.0302	-8.58513	-10.0335	-12.0067	-3.47275	-2.87581	-7.66516	-4.02697	-12.746	-5.49572	-15.4953	-15.4322
Lnpk	2	74520291	74579435	-	Lnpk	ENSMUSG00000009207	lunapark, ER junction formation factor [Source:MGI Symbol;Acc:MGI:1918115]	-	gene	Name match	0	3.08905e-07	2.51585e-06	-7.79646	-13.9022	-24.6203	-25.1158	-13.449	-26.3591	-22.1959	-15.8364	-20.5921	-11.262	-17.7866	-18.7137	-19.1209	-18.8467	-17.1291	-21.3419	-17.9927	-19.1382	-19.8633	-18.026	-15.6865	-15.7397	-20.041	-19.7764	-13.3903	-12.9452	-14.3936	-16.3668	-15.0934	-15.8433	-18.7471	-17.502	-17.1061	-18.2075	-16.1185	-19.7923
Mtx2	2	74825803	74878431	+	Mtx2	ENSMUSG00000027099	metaxin 2 [Source:MGI Symbol;Acc:MGI:1859652]	+	gene	Name match	0	0.000540474	0.00276221	-2.36127	-9.48123	-24.4519	-14.9752	-11.241	-8.46035	-25.9868	-21.5204	-20.4237	-17.1525	-21.6771	-18.5453	-18.9525	-22.6377	-16.9608	-21.1735	-17.8243	-18.9698	-19.6949	-17.8576	-11.3661	-15.5713	-19.8726	-19.608	-13.2219	-12.7768	-14.2252	-16.1984	-14.925	-15.6749	-18.5787	-17.3336	-10.4638	-18.0391	-15.0756	-13.3426
Hnrnpa3	2	75659261	75669407	+	Hnrnpa3	ENSMUSG00000059005	heterogeneous nuclear ribonucleoprotein A3 [Source:MGI Symbol;Acc:MGI:1917171]	+	gene	Name match	0	1.13261e-22	5.89336e-21	-9.1707	-17.5553	-14.9826	-22.5726	-15.2277	-23.8159	-23.612	-19.1456	-18.0489	-8.58131	-19.3023	-11.3746	-16.5777	-20.2629	-14.5859	-18.7987	-15.4495	-16.595	-17.3201	-15.4828	-13.1433	-13.1965	-17.4978	-17.2332	-10.8471	-10.402	-11.8504	-13.8236	-12.5502	-13.3001	-16.2039	-14.9588	-14.5629	-15.6643	-17.3122	-17.2491
Nfe2l2	2	75675513	75704641	-	Nfe2l2	ENSMUSG00000015839	nuclear factor, erythroid derived 2, like 2 [Source:MGI Symbol;Acc:MGI:108420]	-	gene	Name match	0	2.89477e-26	2.16445e-24	-6.21561	-10.1238	-16.2177	-14.4145	-11.2395	-25.3373	-19.937	-20.667	-12.2384	-16.2991	-13.4143	-11.2	-8.857	-21.7843	-7.42787	-20.3201	-16.9709	-18.1164	-18.8415	-17.0042	-8.24596	-14.7179	-19.0192	-18.7546	-12.3685	-11.9234	-13.3718	-15.345	-14.0716	-14.8215	-17.7253	-10.9359	-6.76744	-17.1857	-13.3597	-9.54436
E030042O20Rik	2	75704770	75710024	+	E030042O20Rik	ENSMUSG00000087222	RIKEN cDNA E030042O20 gene [Source:MGI Symbol;Acc:MGI:2444099]	+	gene	Name match	0	0.00126009	0.00602388	7.2172	-16.6061	-21.1278	-1.59685	-10.8045	-14.481	-22.6627	-18.1963	-17.0996	-13.8284	-18.353	-6.42531	-15.6284	-19.3136	-13.6367	-17.8494	-14.5003	-15.6457	-16.3708	-14.5335	-12.1941	-12.2472	-16.5485	-16.2839	-9.89783	-9.45275	-10.9011	-12.8743	-11.6009	-12.3508	-15.2546	-14.0095	-13.6137	-14.715	-16.3629	-16.2998
Agps	2	75832177	75931350	+	Agps	ENSMUSG00000042410	alkylglycerone phosphate synthase [Source:MGI Symbol;Acc:MGI:2443065]	+	gene	Name match	0	2.76545e-05	0.000170581	-5.28007	-10.5746	-15.3859	-15.516	-7.40967	-18.4852	-16.9304	-14.4623	-13.7346	-9.63849	-12.713	-10.0429	-9.92998	-14.1758	-8.19342	-13.0499	-9.61491	-10.9871	-12.4126	-9.55628	-7.99948	-8.23012	-11.7278	-15.0126	-7.52459	-13.691	-8.0448	-8.17913	-7.61563	-8.45397	-11.7188	-8.6569	-7.68026	-9.62629	-10.9959	-10.7787
Prkra	2	76629898	76648015	-	Prkra	ENSMUSG00000002731	protein kinase, interferon inducible double stranded RNA dependent activator [Source:MGI Symbol;Acc:MGI:1344375]	-	gene	Name match	0	1.79884e-06	1.30979e-05	-7.73661	-11.6547	-22.9135	-23.409	-16.0641	-24.6523	-24.4484	-19.982	-18.8853	-15.6141	-20.1387	-17.0068	-17.4141	-21.0993	-15.4223	-19.6351	-16.2859	-17.4313	-18.1564	-16.3191	-13.9797	-14.0329	-13.1822	-18.0696	-11.6835	-11.2384	-12.6868	-14.66	-13.3866	-14.1364	-17.0403	-15.7952	-15.3993	-16.5007	-18.1486	-18.0855
Fkbp7	2	76663044	76673116	-	Fkbp7	ENSMUSG00000002732	FK506 binding protein 7 [Source:MGI Symbol;Acc:MGI:1336879]	-	gene	Name match	0	2.73851e-22	1.35936e-20	-5.39202	-11.6379	-22.0665	-22.5621	-10.7432	-23.8053	-23.6015	-19.1351	-18.0383	-14.7671	-19.2918	-16.1599	-16.5672	-20.2523	-14.5754	-18.7882	-15.439	-16.5844	-17.3095	-15.4722	-13.1328	-13.1859	-17.4872	-17.2226	-10.8366	-10.3915	-11.8399	-13.813	-12.5396	-13.2895	-16.1934	-14.9482	-14.5524	-15.6537	-17.3017	-17.2385
Plekha3	2	76675281	76696828	+	Plekha3	ENSMUSG00000002733	pleckstrin homology domain-containing, family A (phosphoinositide binding specific) member 3 [Source:MGI Symbol;Acc:MGI:1932515]	+	gene	Name match	0	0.000188993	0.00103915	-4.0821	-11.413	-23.1636	-23.6591	-16.3142	-24.9024	-24.6985	-20.2321	-19.1354	-15.8642	-20.3888	-17.257	-17.6642	-21.3494	-15.6724	-19.8852	-16.536	-17.6815	-18.4066	-16.5693	-14.2298	-14.283	-18.5843	-13.5238	-11.9336	-11.4885	-12.9369	-14.9101	-13.6367	-14.3866	-17.2904	-16.0453	-15.6494	-16.7508	-18.3987	-18.3356
Ttn	2	76703980	76982547	-	Ttn	ENSMUSG00000051747	titin [Source:MGI Symbol;Acc:MGI:98864]	-	gene	Name match	0	0.00108705	0.00527461	4.62575	-11.2288	-17.1687	-27.3515	-12.7778	-11.6166	-23.8466	-17.9145	-22.8278	-19.5566	-24.0812	-20.9494	-16.0347	-25.0418	-15.1254	-23.5776	-20.2284	-15.7956	-22.099	-16.4092	-17.9222	-17.9754	-22.2767	-22.0121	-15.626	-15.1809	-16.6293	-18.6025	-17.3291	-18.079	-20.9828	-19.7377	-19.3419	-20.4432	-22.0911	-14.5097
Sestd1	2	77180340	77280592	-	Sestd1	ENSMUSG00000042272	SEC14 and spectrin domains 1 [Source:MGI Symbol;Acc:MGI:1916262]	-	gene	Name match	0	6.33771e-17	1.82202e-15	-7.70064	-12.5632	-15.9628	-18.5754	-15.3802	-27.1204	-26.9165	-22.4501	-21.3534	-12.8428	-22.6068	-19.475	-19.8822	-23.5674	-13.3461	-22.1032	-18.7541	-19.8995	-20.6246	-18.7873	-16.4479	-16.501	-20.8023	-20.5377	-14.1516	-13.7066	-15.1549	-17.1281	-15.8547	-16.6046	-19.5085	-18.2633	-17.8675	-18.9688	-20.6167	-20.5536
Ube2e3	2	78868124	78921293	+	Ube2e3	ENSMUSG00000027011	ubiquitin-conjugating enzyme E2E 3 [Source:MGI Symbol;Acc:MGI:107412]	+	gene	Name match	0	4.074e-10	4.87879e-09	-6.19545	-11.0347	-15.7678	-13.7962	-11.7648	-26.2054	-26.0016	-16.429	-20.4384	-11.4917	-16.0163	-18.56	-18.9673	-22.6524	-16.9755	-21.1883	-13.8797	-18.9845	-19.7096	-17.8723	-15.5329	-10.9105	-19.8874	-19.6228	-13.2367	-12.7916	-14.24	-16.2131	-14.9397	-15.6896	-13.0839	-17.3483	-9.94252	-18.0539	-14.2279	-19.6387
Itprid2	2	79635352	79672966	+	Itprid2	ENSMUSG00000027007	ITPR interacting domain containing 2 [Source:MGI Symbol;Acc:MGI:1917849]	+	gene	Name match	0	2.20475e-08	2.09643e-07	-6.08698	-12.2275	-23.9674	-16.0773	-17.1179	-25.7061	-25.5023	-21.0359	-19.9391	-11.1236	-21.1926	-18.0607	-18.468	-22.1531	-16.4762	-20.689	-17.3398	-18.4852	-19.2103	-17.373	-15.0336	-15.0868	-19.3881	-19.1235	-12.7374	-12.2923	-13.7407	-15.7138	-14.4404	-9.64599	-18.0942	-16.849	-16.4532	-17.5546	-19.2025	-19.1394
Pde1a	2	79834453	80129458	-	Pde1a	ENSMUSG00000059173	phosphodiesterase 1A, calmodulin-dependent [Source:MGI Symbol;Acc:MGI:1201792]	-	gene	Name match	0	7.7003e-10	8.89809e-09	-6.22529	-11.7277	-17.5555	-19.0438	-15.1299	-24.7181	-28.4737	-17.141	-22.9105	-19.6393	-18.69	-16.7926	-15.5324	-25.1245	-13.5142	-17.5083	-20.3112	-21.4566	-22.1817	-20.3444	-18.005	-18.0581	-22.3594	-22.0948	-15.7087	-15.2637	-16.712	-18.6852	-17.4118	-18.1617	-21.0656	-19.8204	-19.4246	-16.204	-15.8519	-22.1107
[truncated: 7,943 more rows]
[truncated: 103 more columns]

## Sheet: DEG (YFP+ clusters 2 vs 3)
Probe	Chromosome	Start	End	Probe Strand	Feature	ID	Description	Feature Strand	Type	Feature Orientation	Distance	P-value (EdgeR stats p<0.05 after correction)	FDR (EdgeR stats p<0.05 after correction)	Log2 Fold Change (EdgeR stats p<0.05 after correction)	Galaxy192-[RNA_STAR_on_data_16_and_data_15__mapped.bam].bam	Galaxy1018-[RNA_STAR_on_data_961_and_data_960__mapped.bam].bam	Galaxy1198-[RNA_STAR_on_data_1123_and_data_1122__mapped.bam].bam	Galaxy781-[RNA_STAR_on_data_771_and_data_770__mapped.bam].bam	Galaxy1186-[RNA_STAR_on_data_1115_and_data_1114__mapped.bam].bam	Galaxy189-[RNA_STAR_on_data_14_and_data_13__mapped.bam].bam	Galaxy1238-[adult_YFP__13-1.bam].bam	Galaxy1210-[RNA_STAR_on_data_1131_and_data_1130__mapped.bam].bam	Galaxy210-[RNA_STAR_on_data_28_and_data_27__mapped.bam].bam	Galaxy922-[RNA_STAR_on_data_901_and_data_900__mapped.bam].bam	Galaxy1213-[RNA_STAR_on_data_1133_and_data_1132__mapped.bam].bam	Galaxy1222-[RNA_STAR_on_data_1139_and_data_1138__mapped.bam].bam	Galaxy1050-[RNA_STAR_on_data_1022_and_data_1021__mapped.bam].bam	Galaxy991-[RNA_STAR_on_data_943_and_data_942__mapped.bam].bam	Galaxy841-[RNA_STAR_on_data_807_and_data_806__mapped.bam].bam	Galaxy1006-[RNA_STAR_on_data_953_and_data_952__mapped.bam].bam	Galaxy1171-[RNA_STAR_on_data_1105_and_data_1104__mapped.bam].bam	Galaxy869-[RNA_STAR_on_data_851_and_data_850__mapped.bam].bam	Galaxy847-[RNA_STAR_on_data_811_and_data_810__mapped.bam].bam	Galaxy186-[RNA_STAR_on_data_12_and_data_11__mapped.bam].bam	Galaxy207-[RNA_STAR_on_data_26_and_data_25__mapped.bam].bam	Galaxy183-[RNA_STAR_on_data_10_and_data_9__mapped.bam].bam	Galaxy817-[RNA_STAR_on_data_791_and_data_790__mapped.bam].bam	Galaxy778-[RNA_STAR_on_data_769_and_data_768__mapped.bam].bam	Galaxy970-[RNA_STAR_on_data_928_and_data_927__mapped.bam].bam	Galaxy887-[RNA_STAR_on_data_863_and_data_862__mapped.bam].bam	Galaxy755-[RNA_STAR_on_data_743_and_data_741__mapped.bam].bam	Galaxy1207-[RNA_STAR_on_data_1129_and_data_1128__mapped.bam].bam	Galaxy967-[RNA_STAR_on_data_926_and_data_925__mapped.bam].bam	Galaxy829-[RNA_STAR_on_data_799_and_data_798__mapped.bam].bam	Galaxy1059-[RNA_STAR_on_data_1028_and_data_1027__mapped.bam].bam	Galaxy787-[RNA_STAR_on_data_775_and_data_774__mapped.bam].bam	Galaxy1153-[RNA_STAR_on_data_1093_and_data_1092__mapped.bam].bam	Galaxy1009-[RNA_STAR_on_data_955_and_data_954__mapped.bam].bam	Galaxy832-[RNA_STAR_on_data_801_and_data_800__mapped.bam].bam
[truncated: 1,091 more rows]
[truncated: 81 more columns]

[truncated: 3 more sheets: GO & KEGG, Selected GO & KEGG, DEG (YFP+ cluster 2 vs P5 CPC)]
